# Supplementary material for: Design and Synthesis of AMPK Activators and GDF15 Inducers
Source: MDPI journal article supplement (doi:10.3390/molecules28145468), 2023-07-17

# Design and Synthesis of AMPK Activators and GDF15 Inducers

Meijian Zhang <sup>1,2,3,†</sup>, Andrea Bagán <sup>4,†</sup>, Donna Martínez <sup>4</sup>, Emma Barroso <sup>1,2,3</sup> , Xavier Palomer <sup>1,2,3</sup>,  
Santiago Vázquez <sup>4</sup> , Carmen Escolano <sup>4,\*</sup>  and Manuel Vázquez-Carrera <sup>1,2,3,\*</sup> 

<sup>1</sup> Department of Pharmacology, Toxicology and Therapeutic Chemistry, Institute of Biomedicine (IBUB), Faculty of Pharmacy and Food Sciences, University of Barcelona, Av. Joan XXIII, 27-31, 08028 Barcelona, Spain; zmeijian@gmail.com (M.Z.); ebarroso@ub.edu (E.B.); xpalomer@ub.edu (X.P.)

<sup>2</sup> Spanish Biomedical Research Center in Diabetes and Associated Metabolic Diseases (CIBERDEM)-Instituto de Salud Carlos III, 28029 Madrid, Spain

<sup>3</sup> Pediatric Research Institute-Hospital Sant Joan de Déu, 08950 Esplugues de Llobregat, Spain

<sup>4</sup> Laboratory of Medicinal Chemistry (Associated Unit to CSIC), Department of Pharmacology, Toxicology and Medicinal Chemistry, Faculty of Pharmacy and Food Sciences, Institute of Biomedicine (IBUB), University of Barcelona, Av. Joan XXIII, 27-31, 08028 Barcelona, Spain; andreabaganp@gmail.com (A.B.); luzy779@gmail.com (D.M.); svazquez@ub.edu (S.V.)

\* Correspondence: cescolano@ub.edu (C.E.); mvazquezcarrera@ub.edu (M.V.-C.)

† These authors contributed equally to this work.

## Contents:

|                                                                                             |    |
|---------------------------------------------------------------------------------------------|----|
| General procedure for the preparation of epoxyde intermediates                              | 2  |
| <sup>1</sup> H-NMR and <sup>13</sup> C-NMR spectra of compounds <b>BC1615</b> , <b>1-15</b> | 3  |
| HPLC/MS analysis of <b>BC1618</b> , <b>1-35</b>                                             | 39 |
| Smiles                                                                                      | 58 |
| HETCOR                                                                                      | 59 |

### 1.1.1. General Procedure for the synthesis of phenoxymethyloxirane derivatives.

A mixture of the corresponding phenol derivative (1 equiv) [4-(trifluoromethyl)phenol, phenol, 4-chlorophenol, 4-methylphenol, 4-isopropylphenol, 4-*tert*-butylphenol, 4-cyclohexylphenol, 4-cyclopentylphenol, 4-benzyloxyphenol, 3,4-dimethylphenol, 4-methoxyphenol, 4-propoxyphenol, 3,4-dichlorophenol, 4-chloro-3-(trifluoromethyl)phenol, 4-nitro-3-(trifluoromethyl)phenol, 2,4-dichlorophenol], ( $\pm$ )-epichlorohydrin (10 equiv) and K<sub>2</sub>CO<sub>3</sub> (1.2 equiv) was stirred in methanol at 120 °C for 4 h. The mixture was evaporated to yield a residue, which was purified by column chromatography (hexane/AcOEt) to afford pure products; 2-[[4-(trifluoromethyl)phenoxy]methyl]oxirane; 2-(phenoxymethyl)oxirane; 2-[(4-chlorophenoxy)methyl]oxirane; 2-[(*p*-tolyl)oxy)methyl]oxirane; 2-[(4-isopropylphenoxy)methyl]oxirane, 2-[[4-(*tert*-butyl)phenoxy]methyl]oxirane, 2-[(4-cyclohexylphenoxy)methyl]oxirane, 2-[(4-cyclopentylphenoxy)methyl]oxirane, 2-[(4-benzyloxy)phenoxy]methyl]oxirane, 2-[(3,4-dimethylphenoxy)methyl]oxirane, 2-[(4-methoxyphenoxy)methyl]oxirane, 2-[(4-propoxyphenoxy)methyl]oxirane, 2-[(3,4-dichlorophenoxy)methyl]oxirane, 2-[[4-chloro-3-(trifluoromethyl)phenoxy]methyl]oxirane, 2-[[4-nitro-3-(trifluoromethyl)phenoxy]methyl]oxirane, 2-[(2,4-dichlorophenoxy)methyl]oxirane.

# <sup>1</sup>H-NMR and <sup>13</sup>C-NMR spectra of new compounds BC1618, 1-35

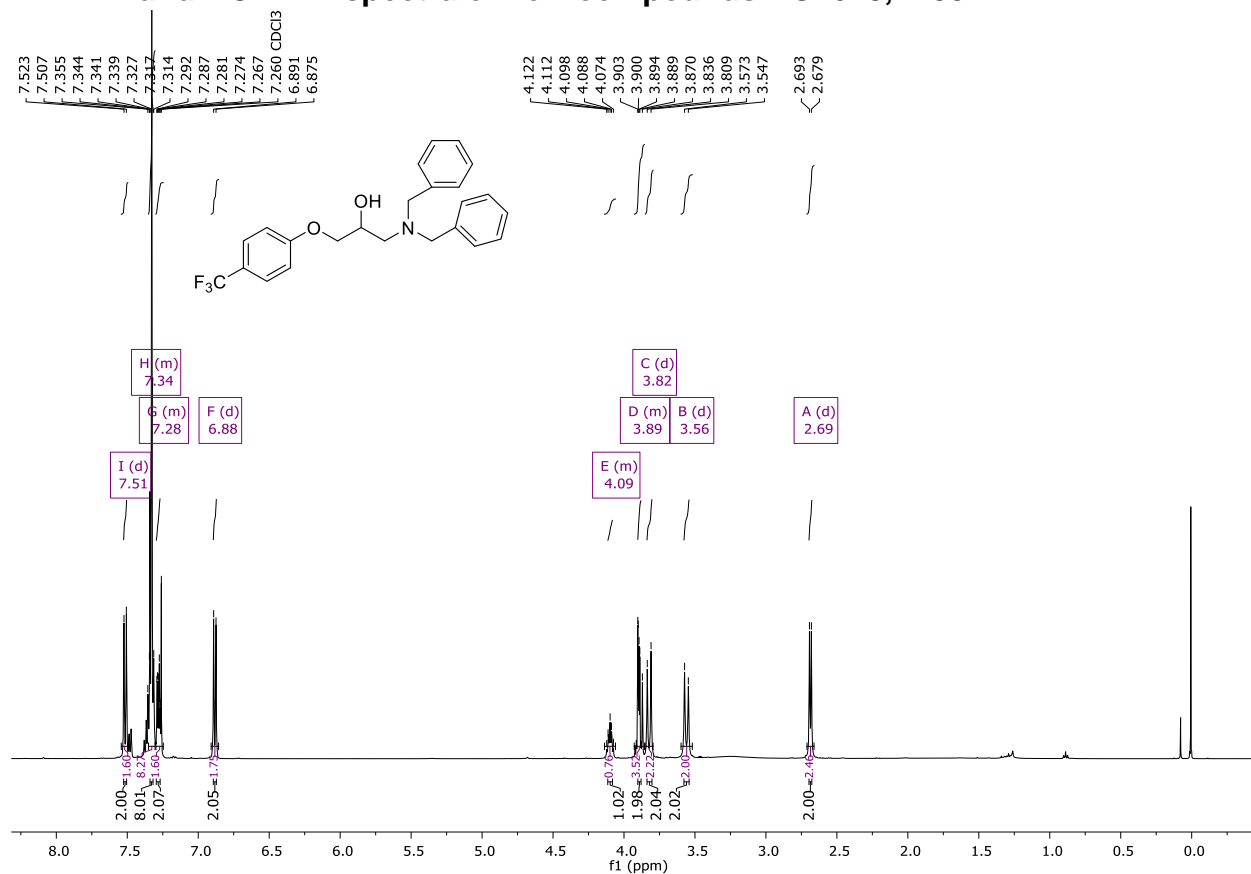

## 1-(Dibenzylamino)-3-[4-(trifluoromethyl)phenoxy]propan-2-ol (BC1618)

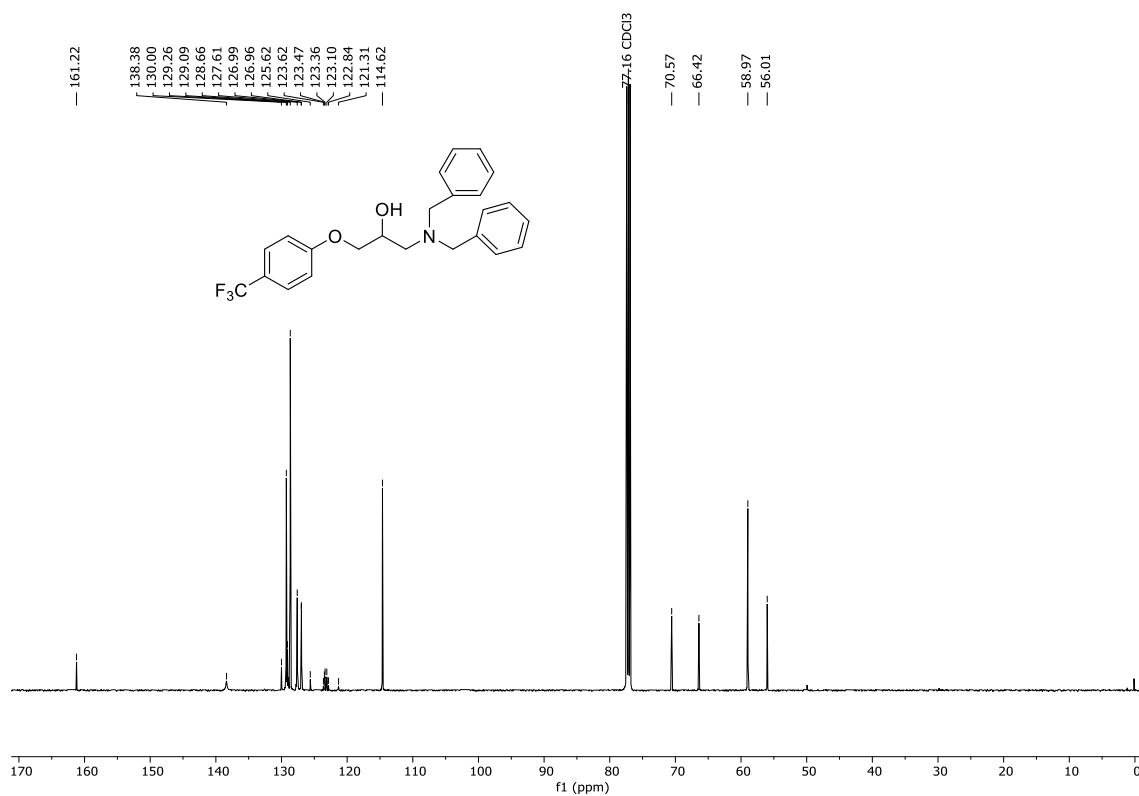

## 1-(Dibenzylamino)-3-[4-(trifluoromethyl)phenoxy]propan-2-ol (BC1618)

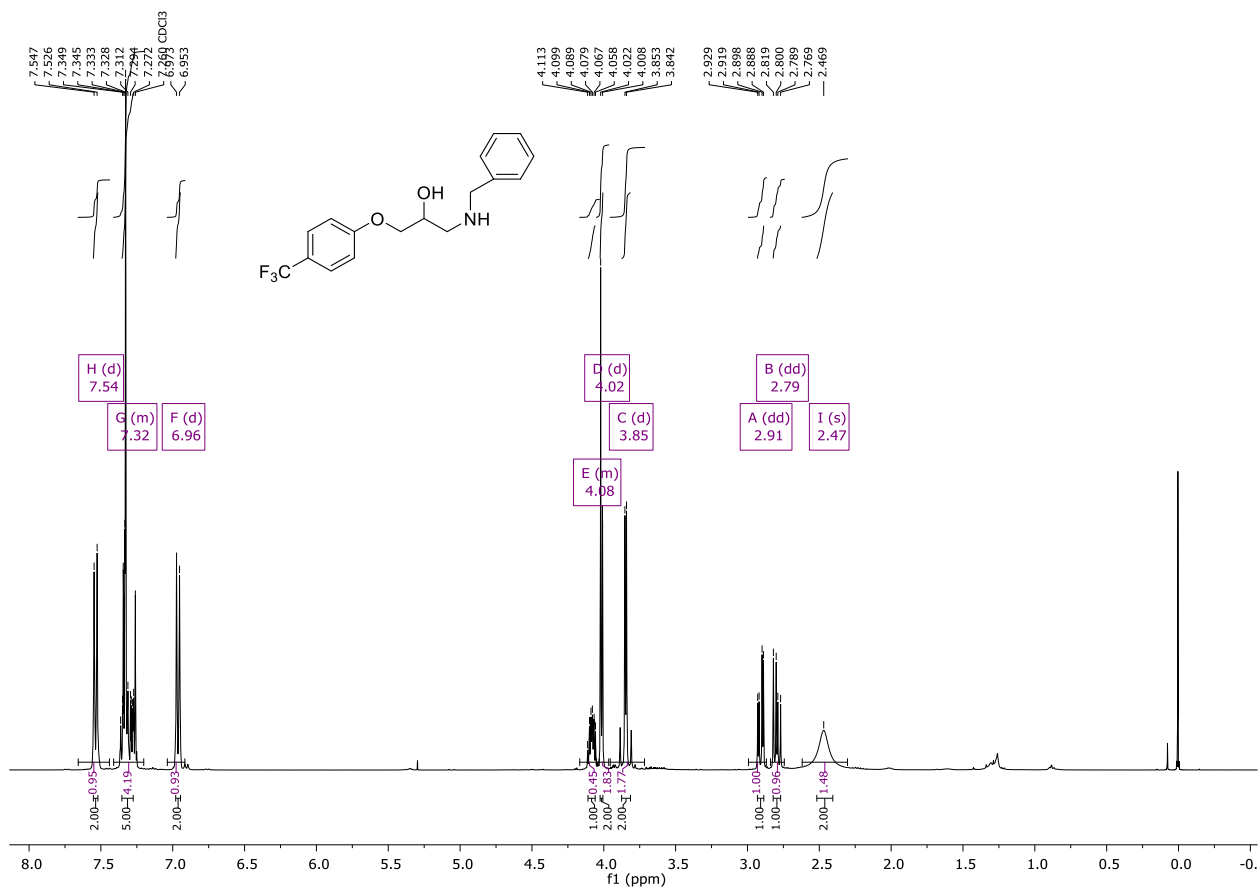

**1-(Benzylamino)-3-[4-(trifluoromethyl)phenoxy]propan-2-ol (1)**

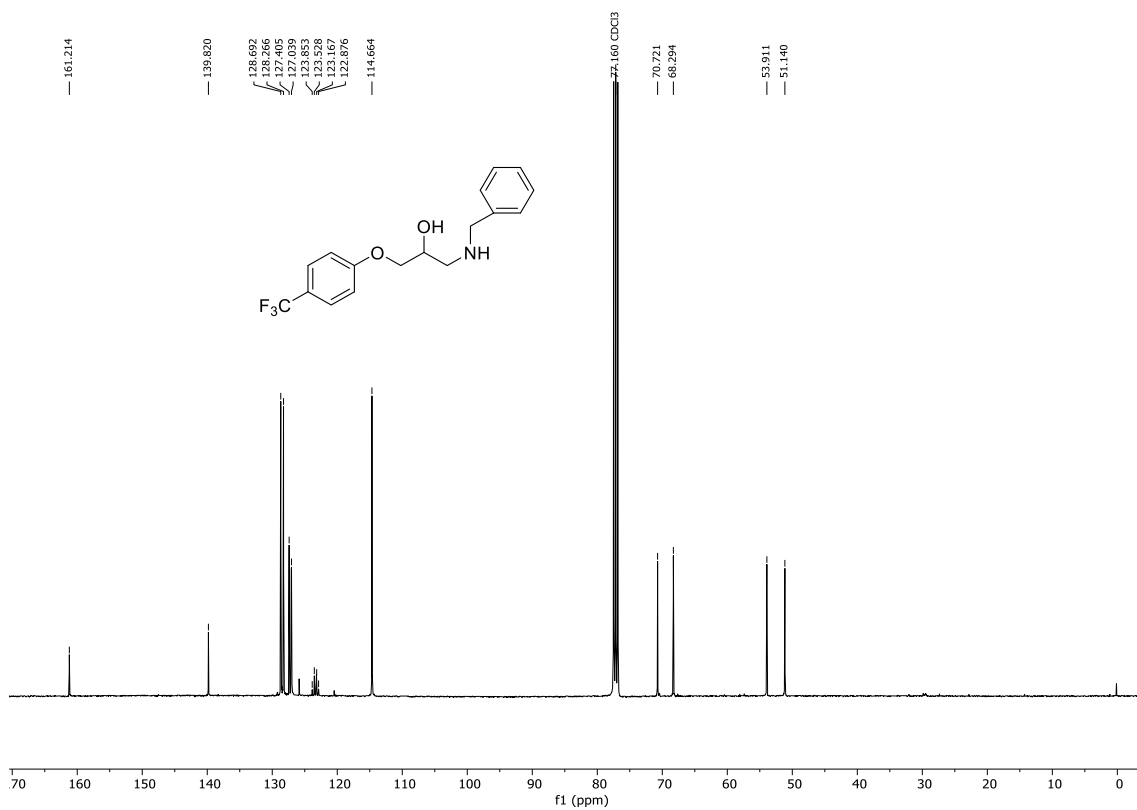

**1-(Benzylamino)-3-[4-(trifluoromethyl)phenoxy]propan-2-ol (1)**



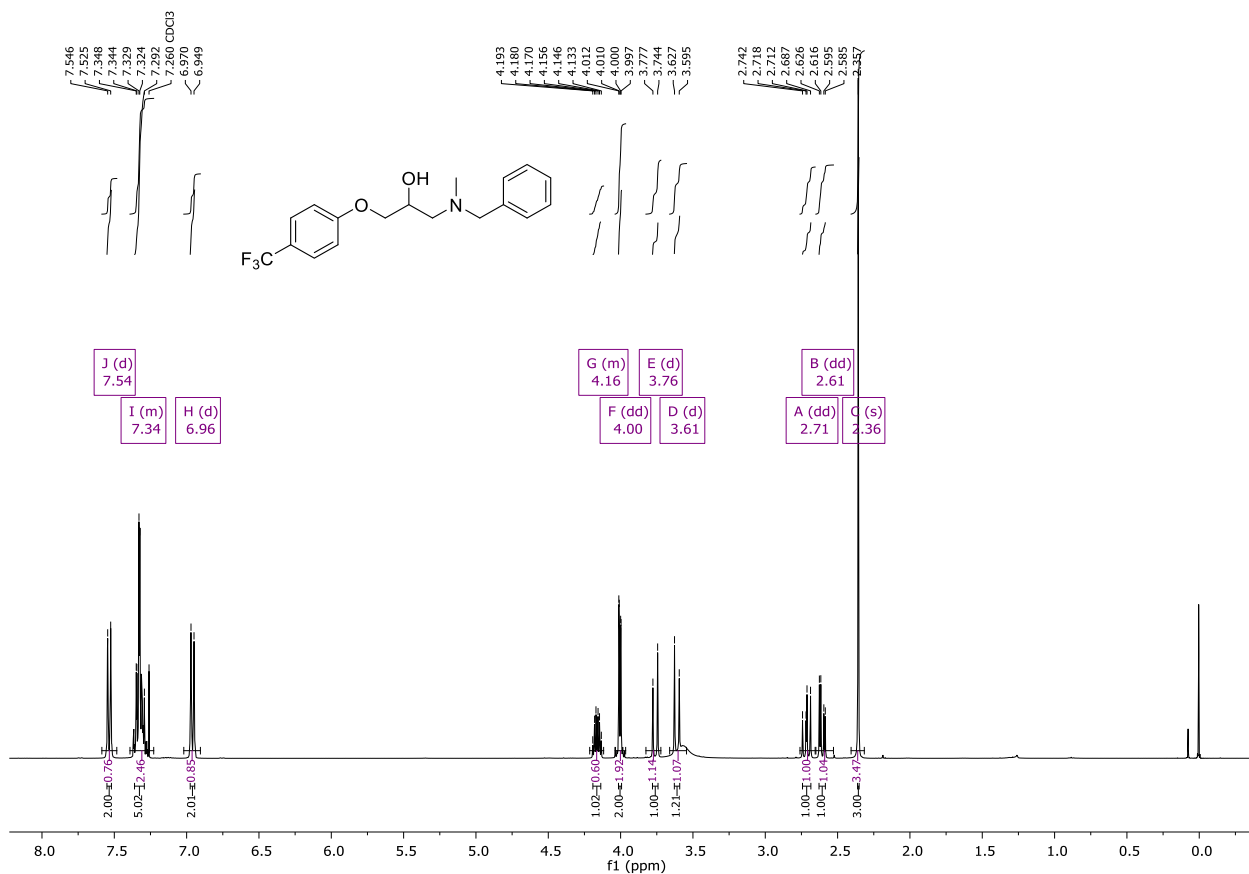

**1-[Methyl(phenyl)amino]-3-[4-(trifluoromethyl)phenoxy]propan-2-ol (2)**

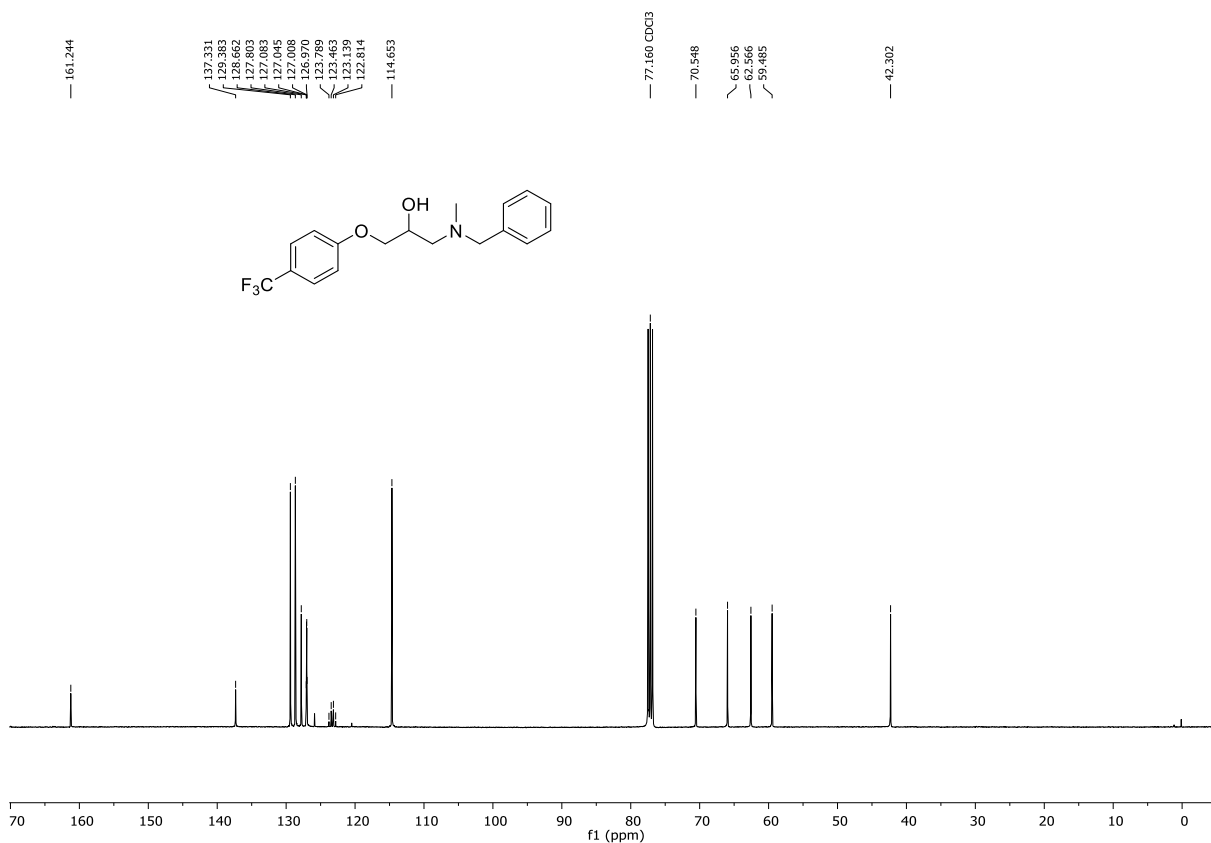

**1-[Methyl(phenyl)amino]-3-[4-(trifluoromethyl)phenoxy]propan-2-ol (2)**

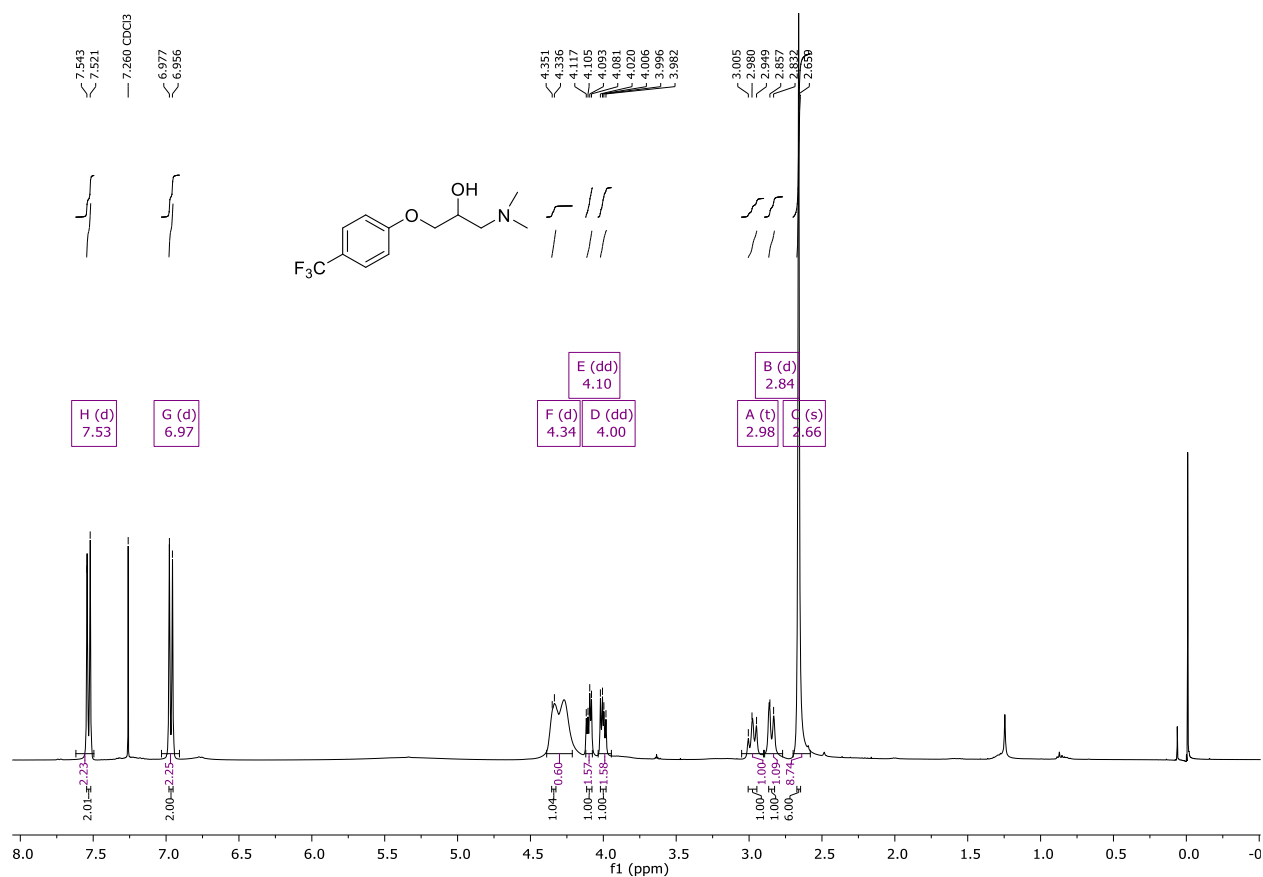

1-(Dimethylamino)-3-[4-(trifluoromethyl)phenoxy]propan-2-ol (3)

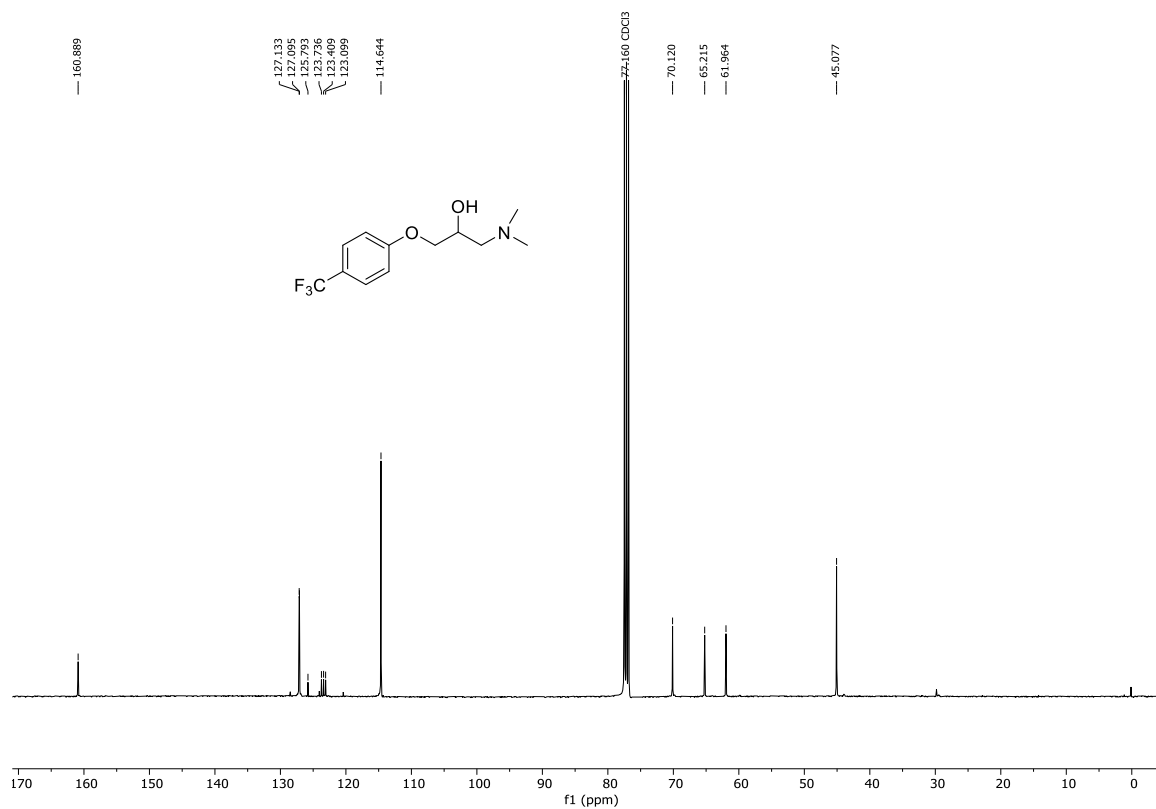

1-(Dimethylamino)-3-[4-(trifluoromethyl)phenoxy]propan-2-ol (3)

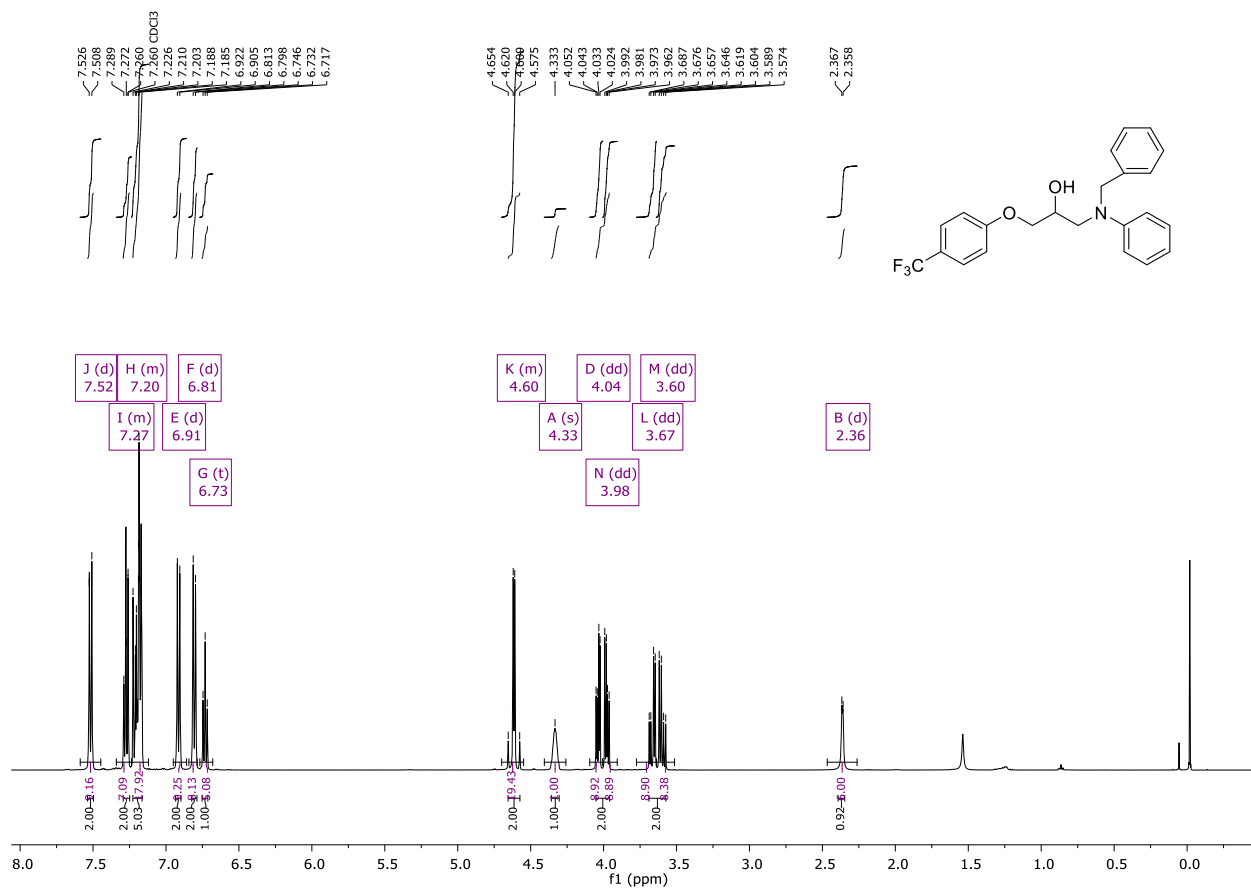

**1-[Benzyl(phenyl)amino]-3-[4-(trifluoromethyl)phenoxy]propan-2-ol (4)**

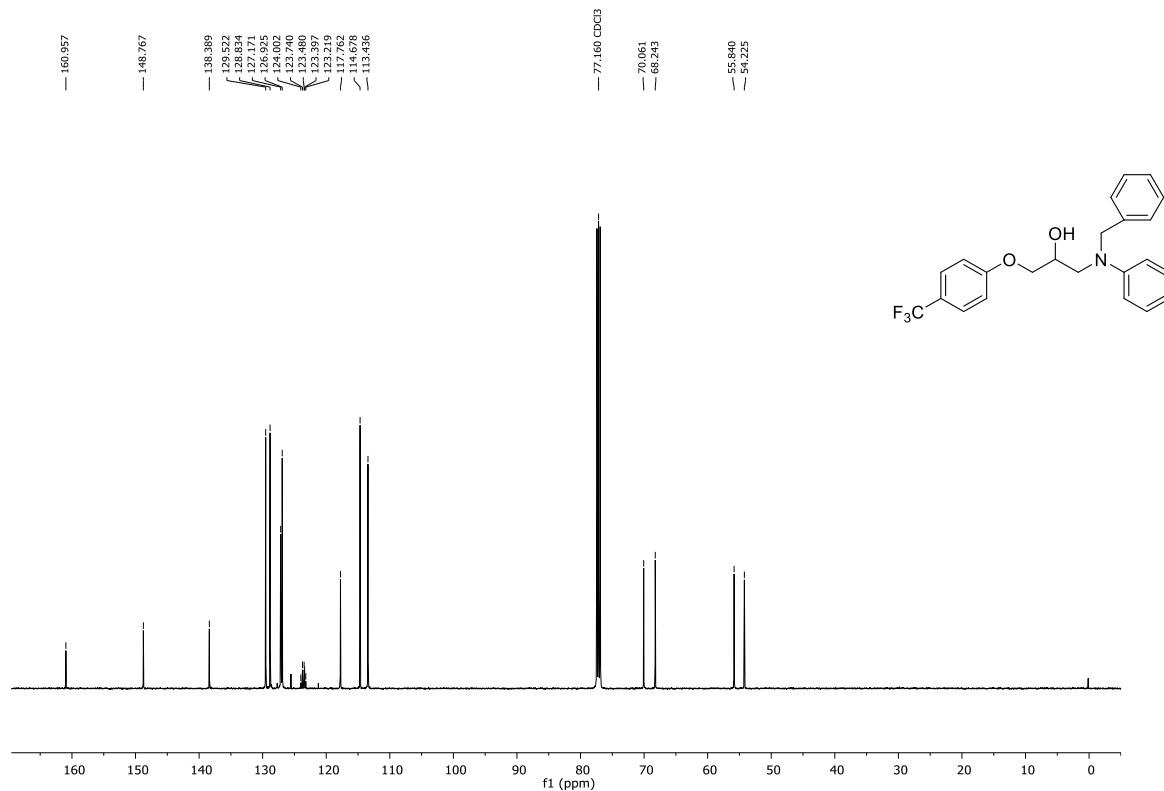

**1-[Benzyl(phenyl)amino]-3-[4-(trifluoromethyl)phenoxy]propan-2-ol (4)**

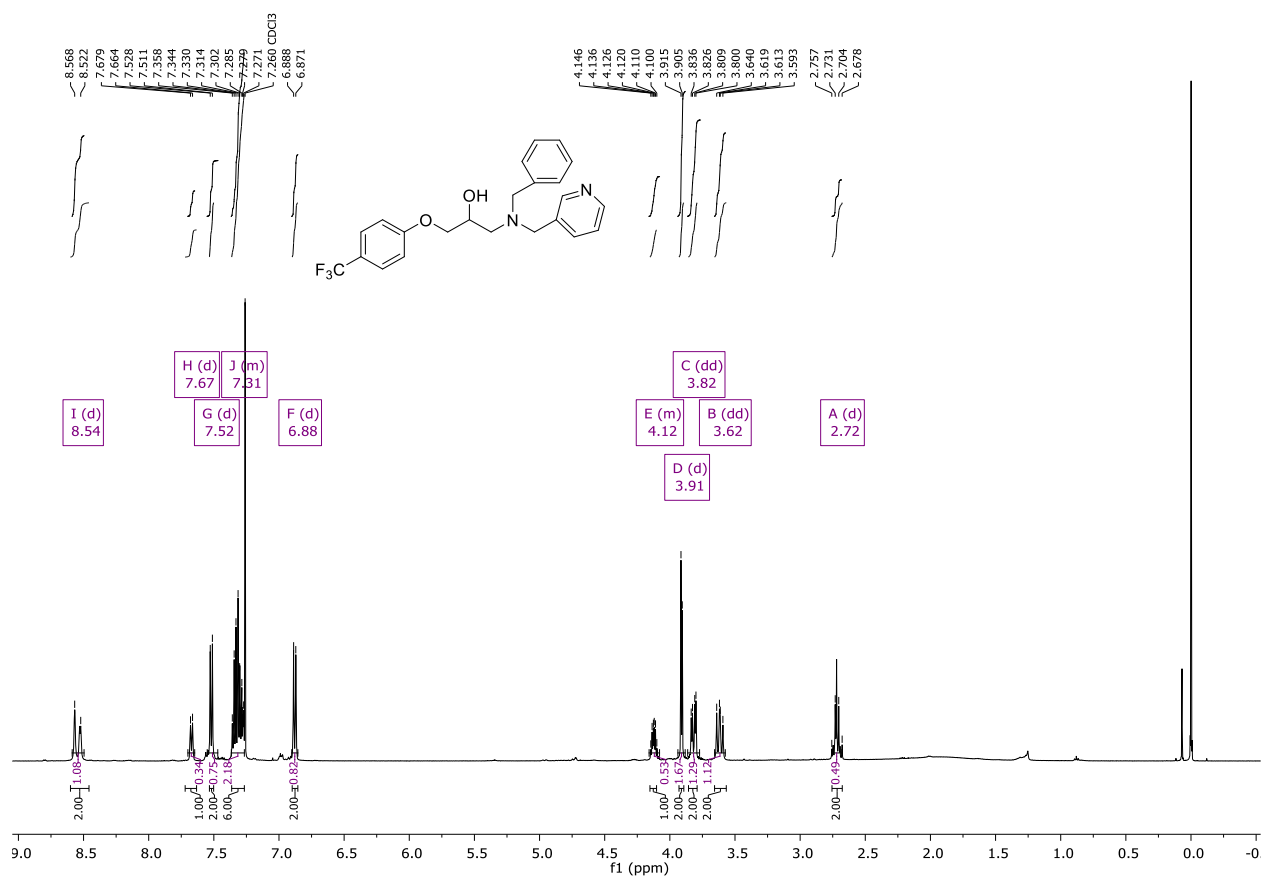

**1-[Benzyl(pyridin-3-ylmethyl)amino]-3-[4-(trifluoromethyl)phenoxy]propan-2-ol (5)**

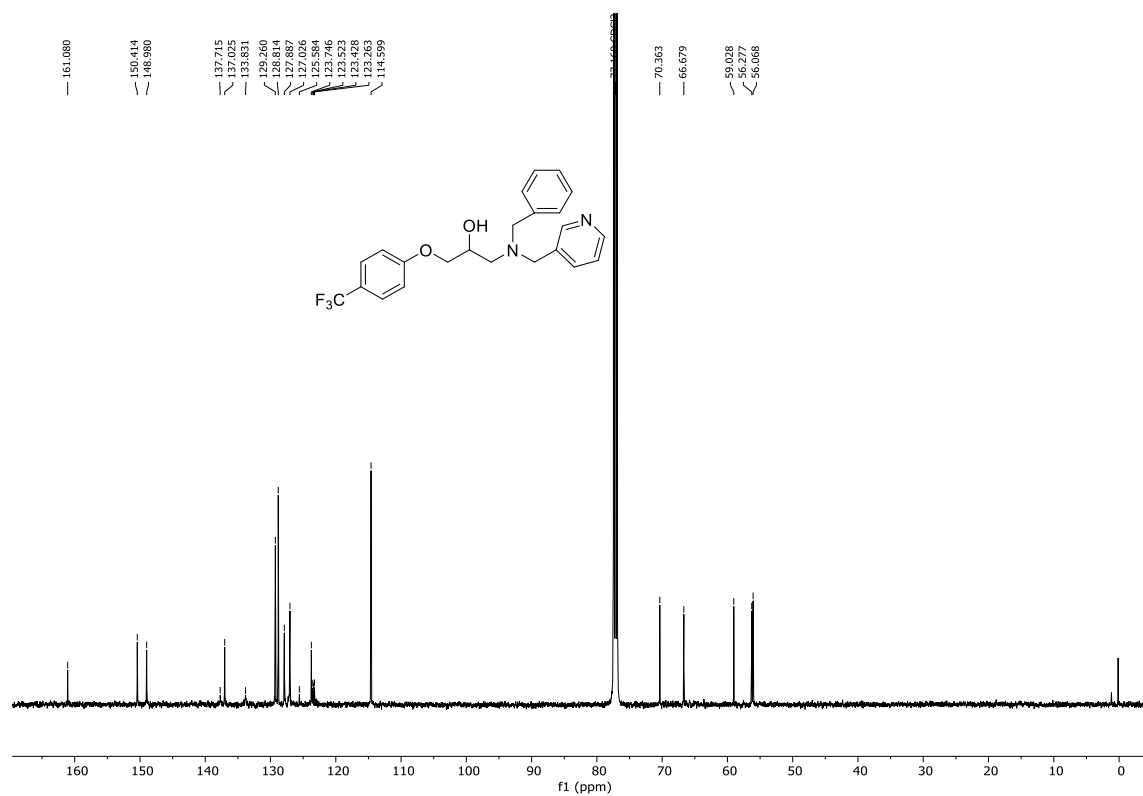

**1-[Benzyl(pyridin-3-ylmethyl)amino]-3-[4-(trifluoromethyl)phenoxy]propan-2-ol (5)**

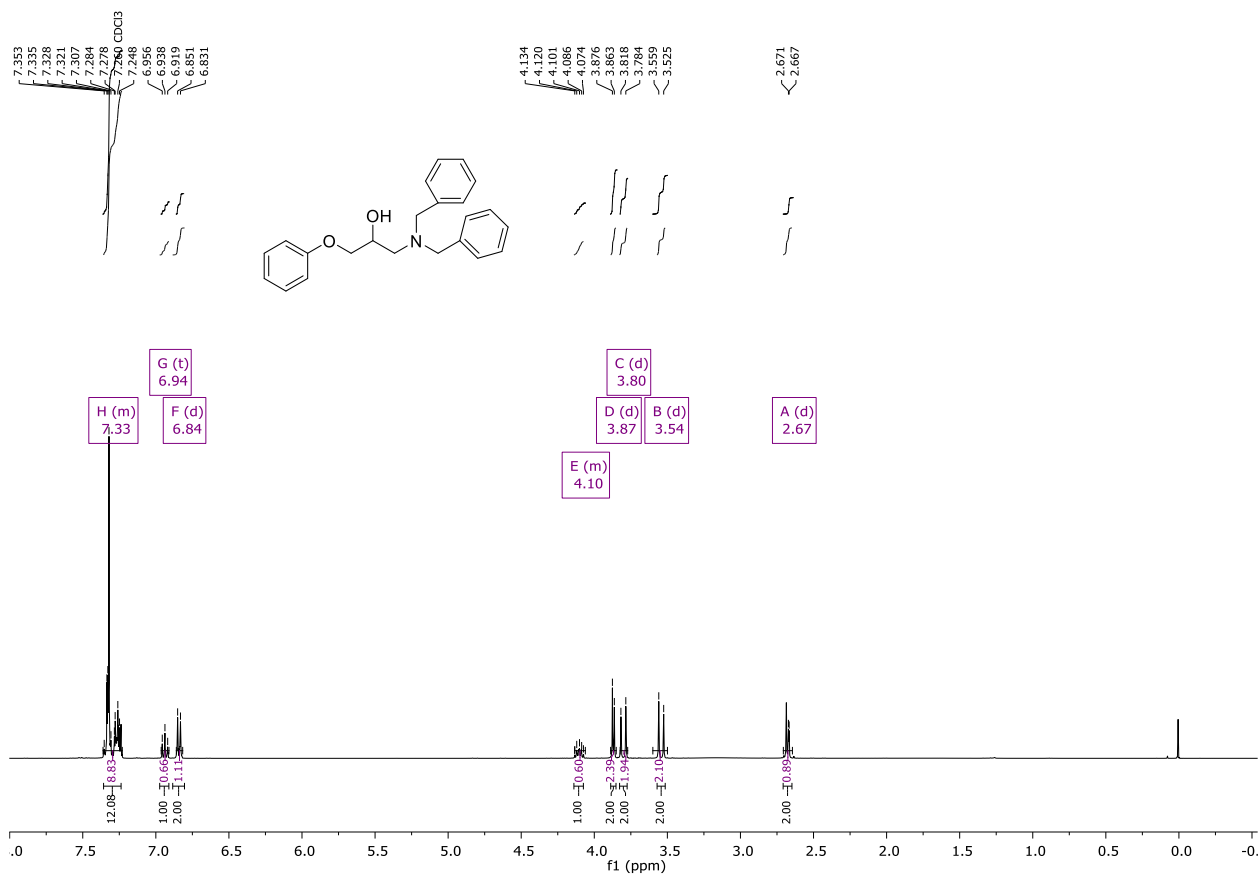

**1-(Dibenzylamino)-3-phenoxypropan-2-ol (6)**

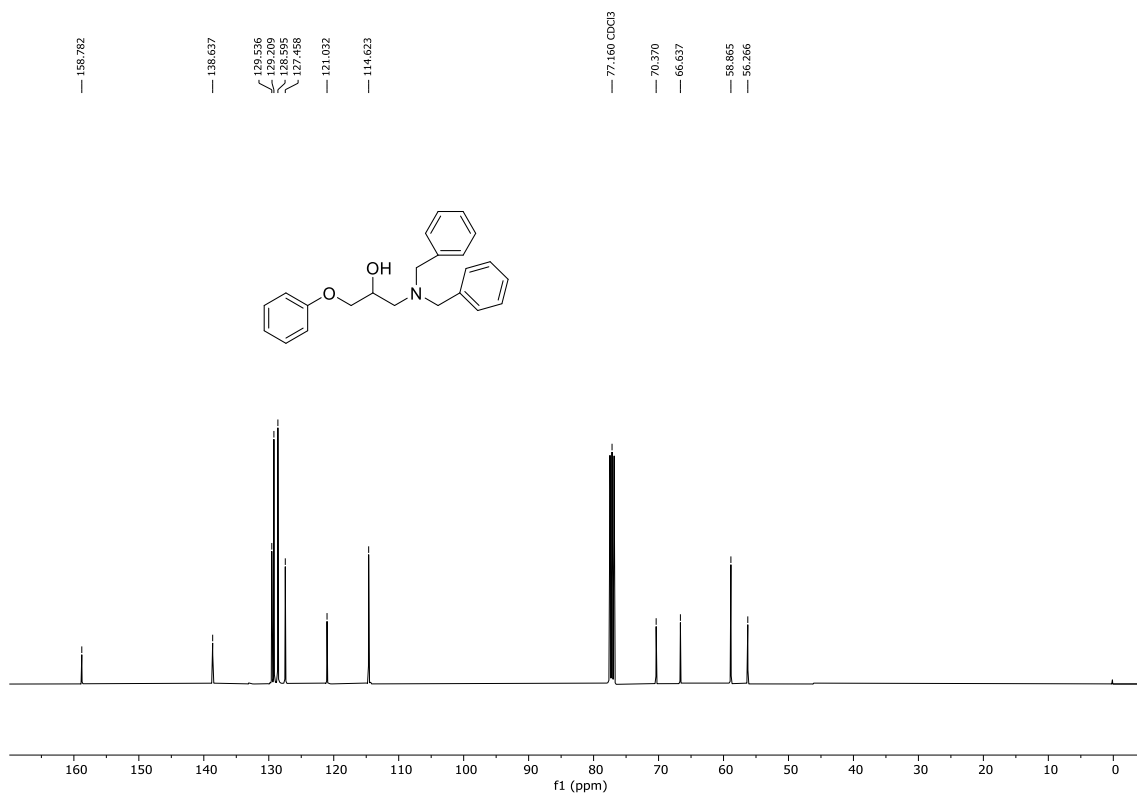

**1-(Dibenzylamino)-3-phenoxypropan-2-ol (6)**

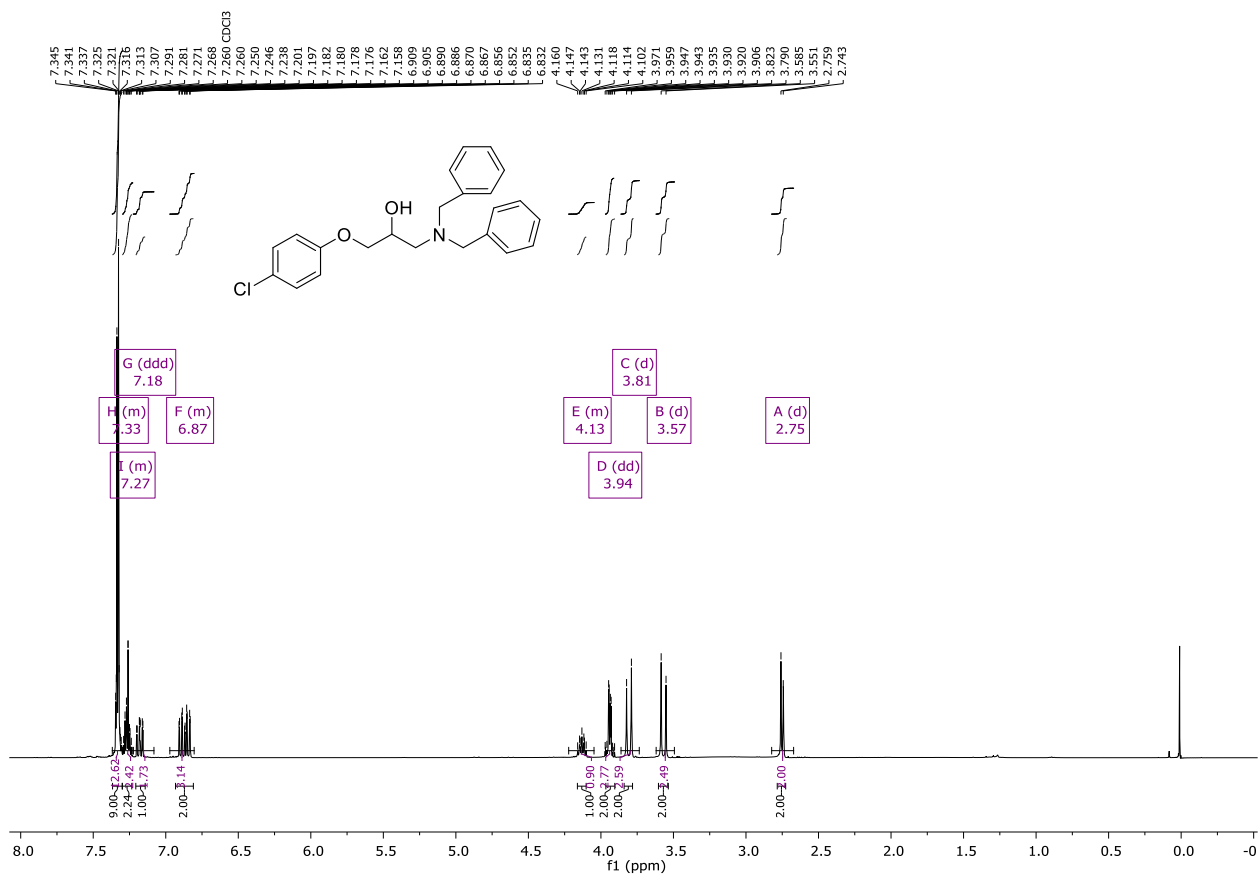

**1-(4-Chlorophenoxy)-3-(dibenzylamino)propan-2-ol (7)**

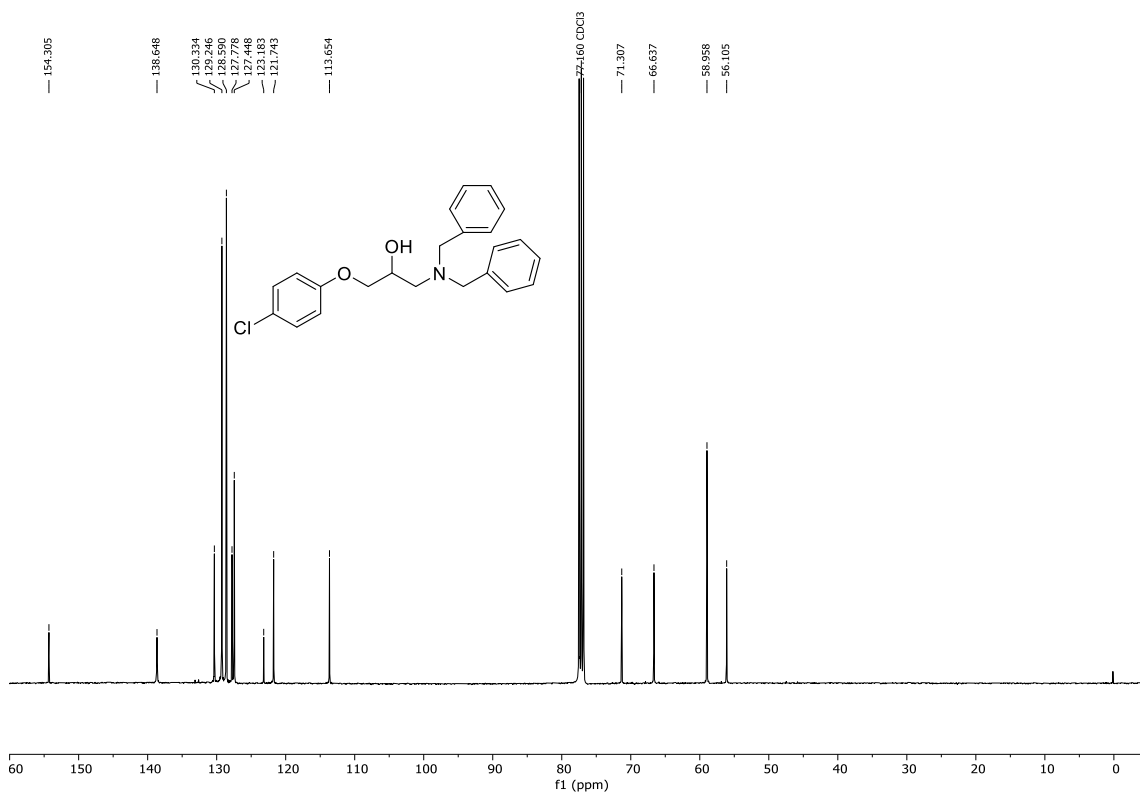

**1-(4-Chlorophenoxy)-3-(dibenzylamino)propan-2-ol (7)**

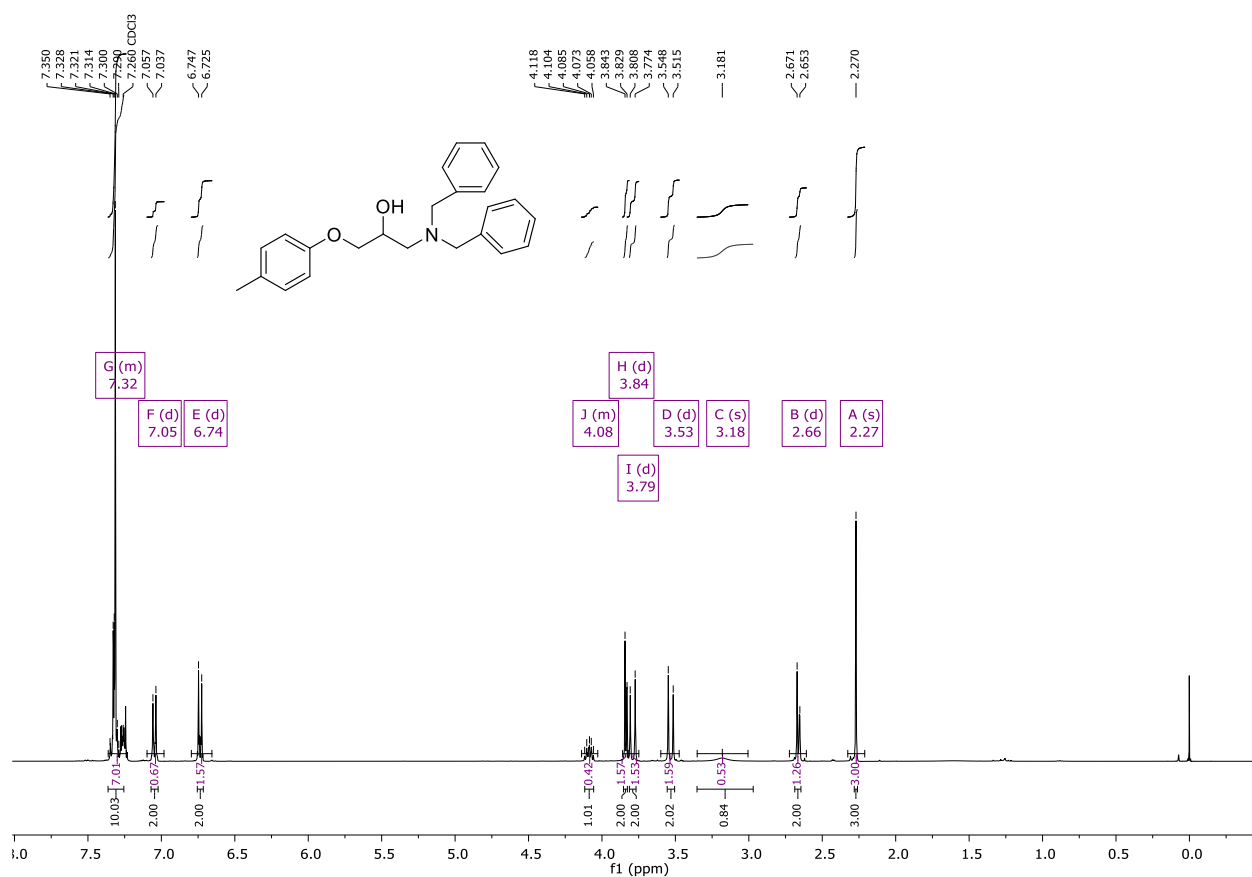

**1-(Dibenzylamino)-3-(*p*-tolylloxy)propan-2-ol (8)**

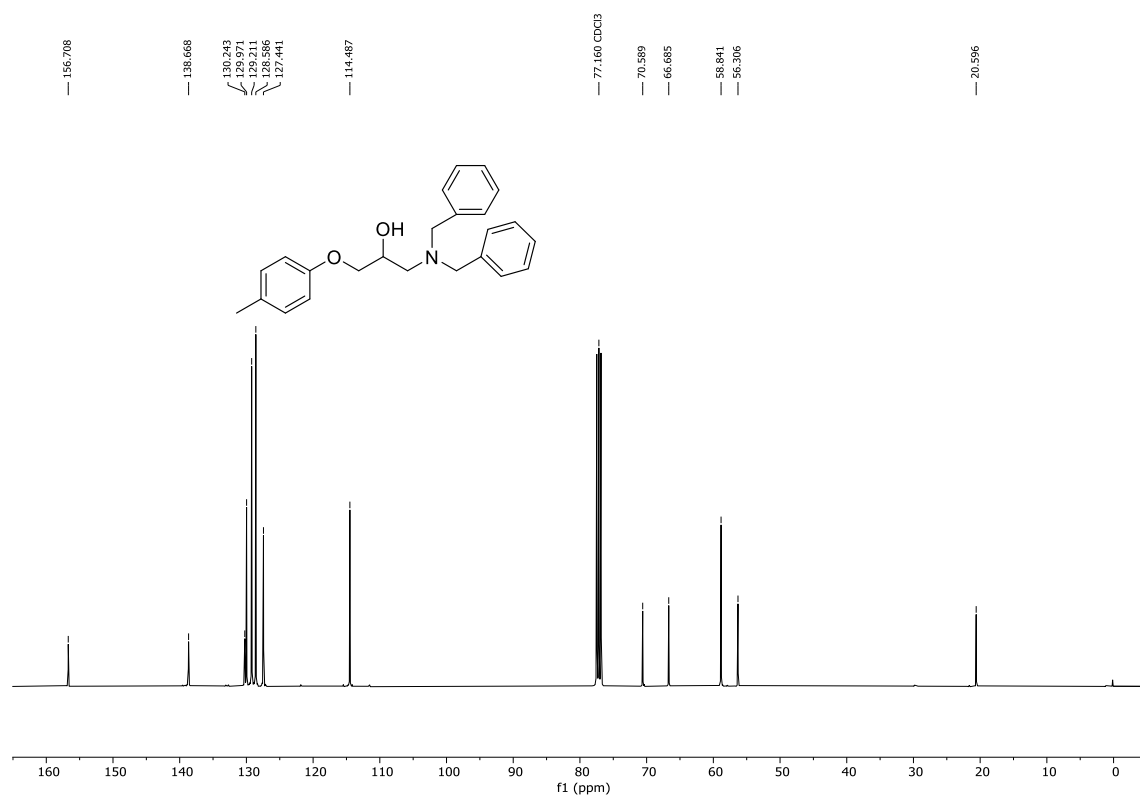

**1-(Dibenzylamino)-3-(*p*-tolylloxy)propan-2-ol (8)**

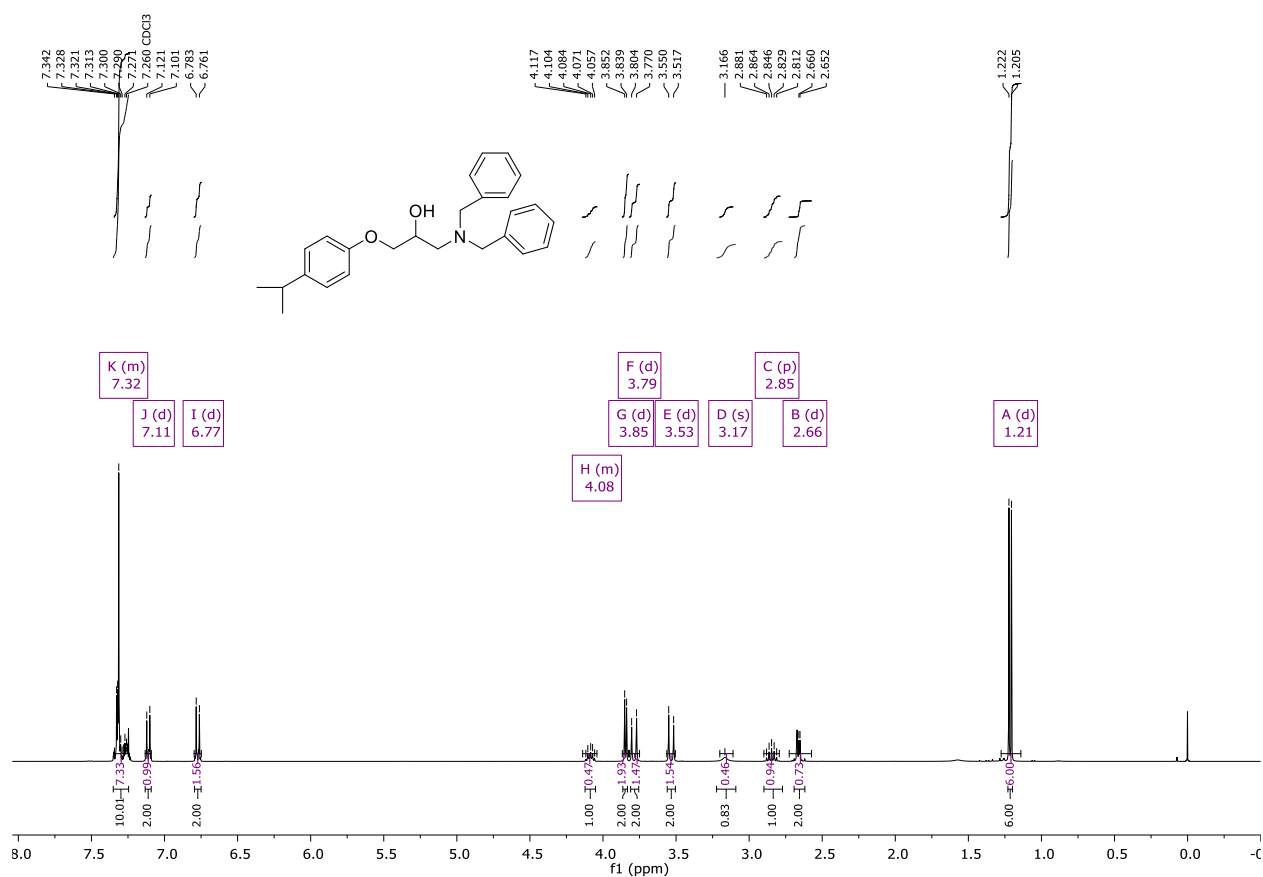

**1-(Dibenzylamino)-3-(4-isopropylphenoxy)propan-2-ol (9)**

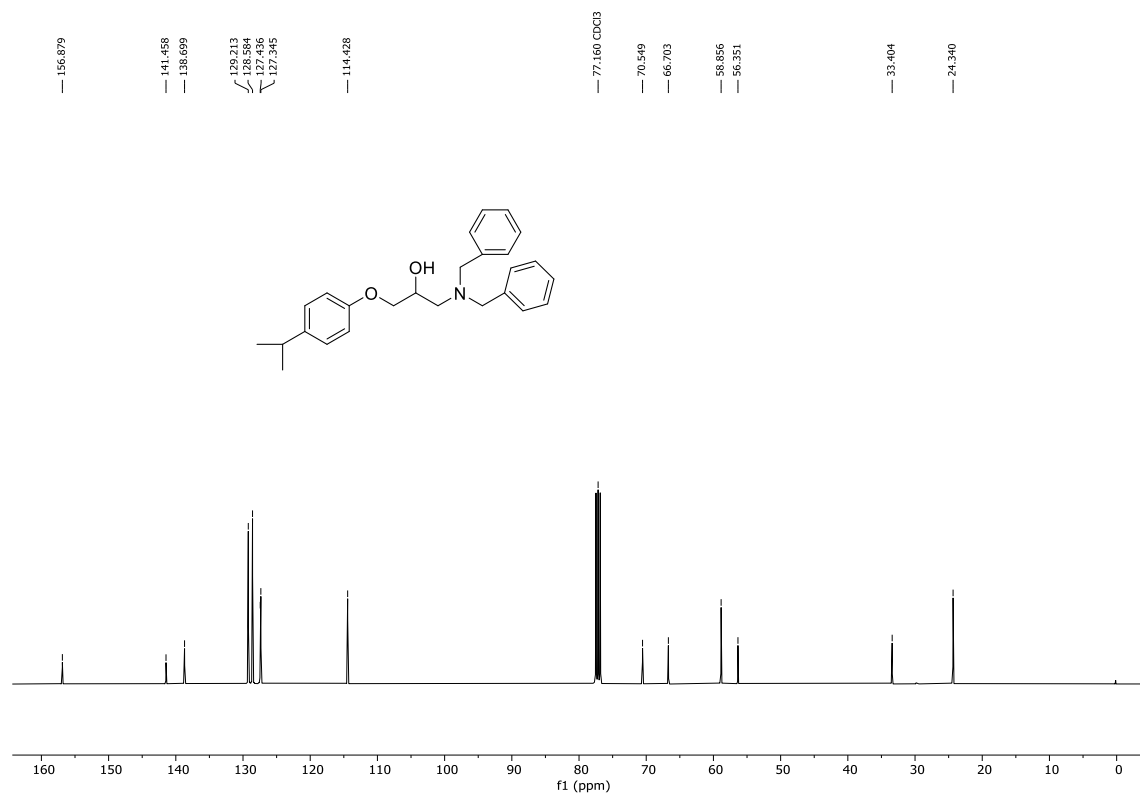

**1-(Dibenzylamino)-3-(4-isopropylphenoxy)propan-2-ol (9)**



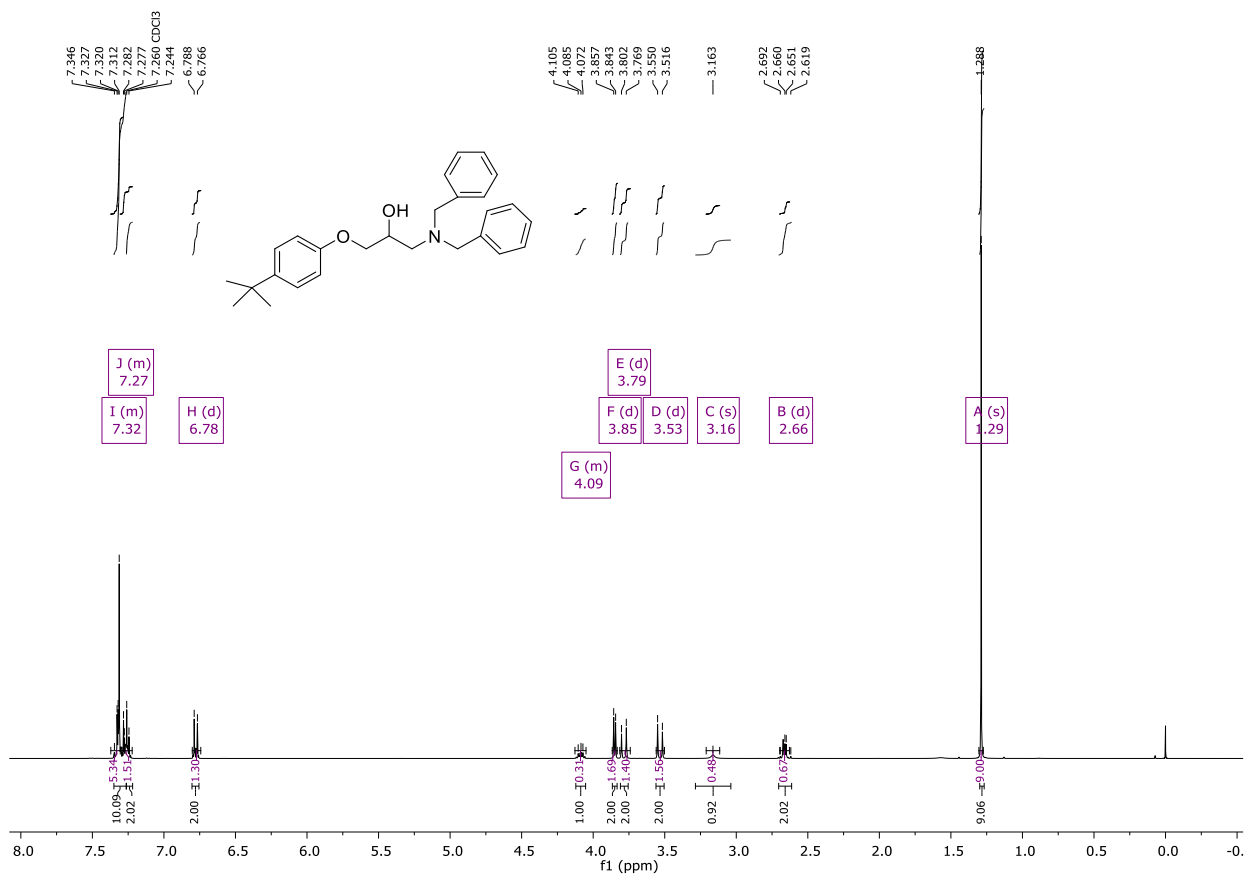

**1-[4-(*Tert*-butyl)phenoxy]-3-(dibenzylamino)propan-2-ol (10)**

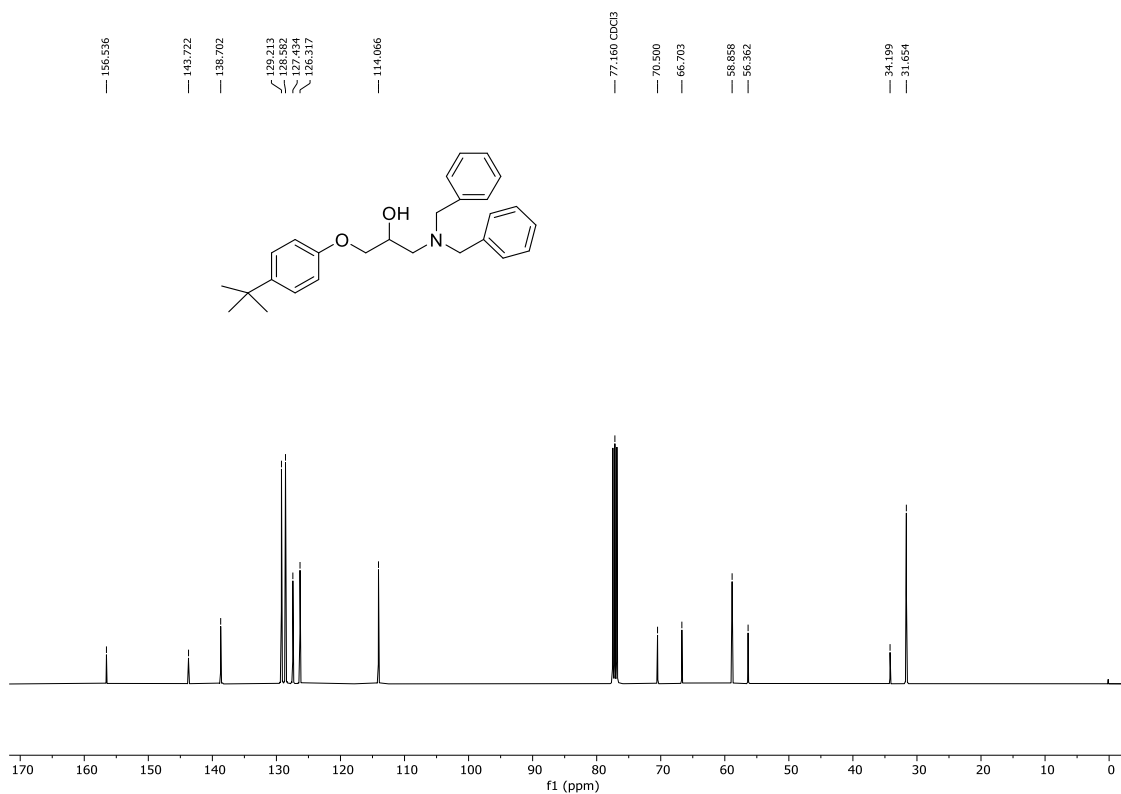

**1-[4-(*Tert*-butyl)phenoxy]-3-(dibenzylamino)propan-2-ol (10)**

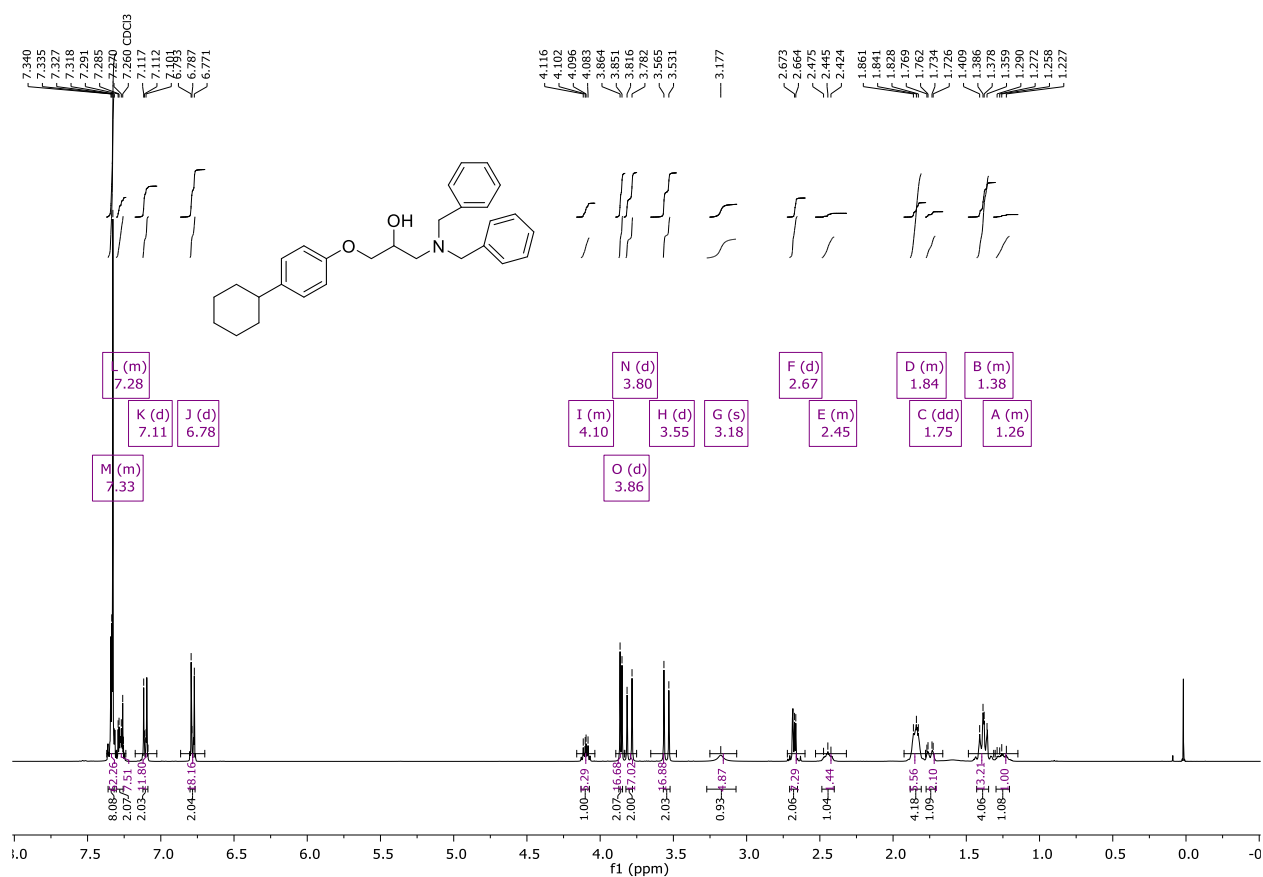

**1-(4-Cyclohexylphenoxy)-3-(dibenzylamino)propan-2-ol (11)**

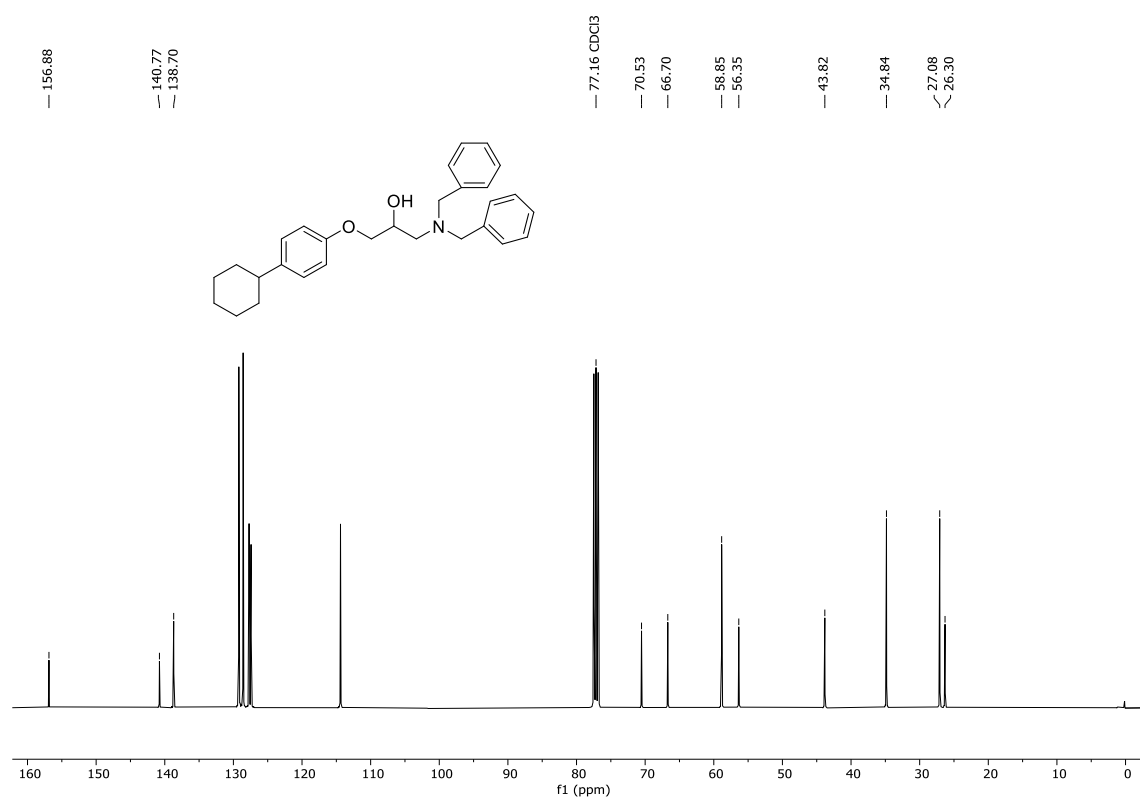

**1-(4-Cyclohexylphenoxy)-3-(dibenzylamino)propan-2-ol (11)**

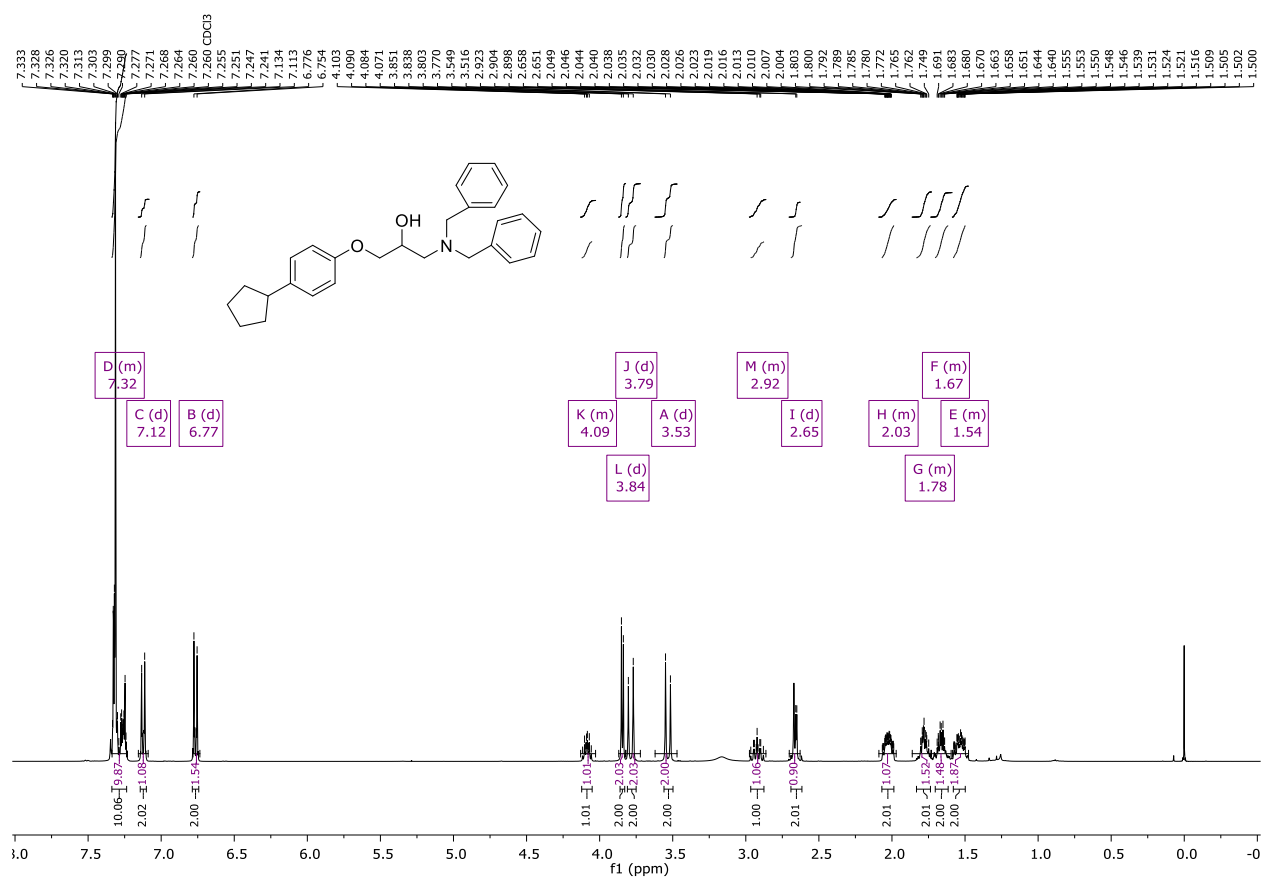

**1-(4-Cyclopentylphenoxy)-3-(dibenzylamino)propan-2-ol (12)**

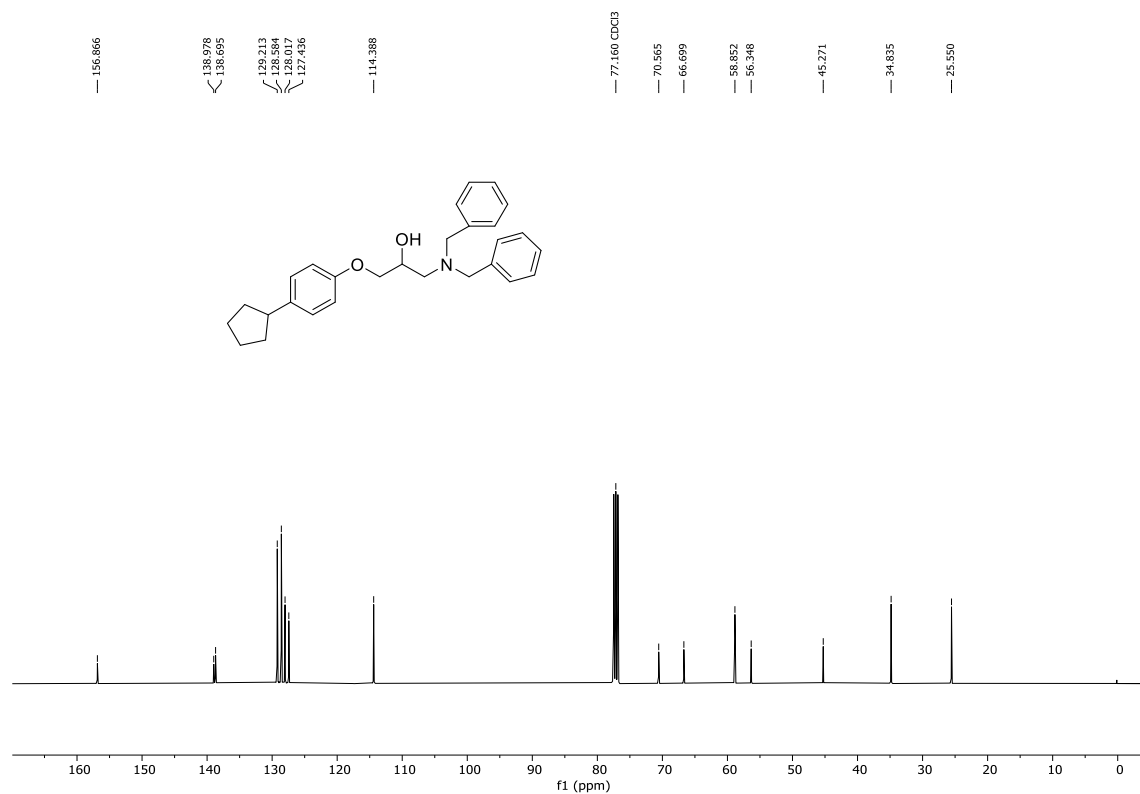

**1-(4-Cyclopentylphenoxy)-3-(dibenzylamino)propan-2-ol (12)**

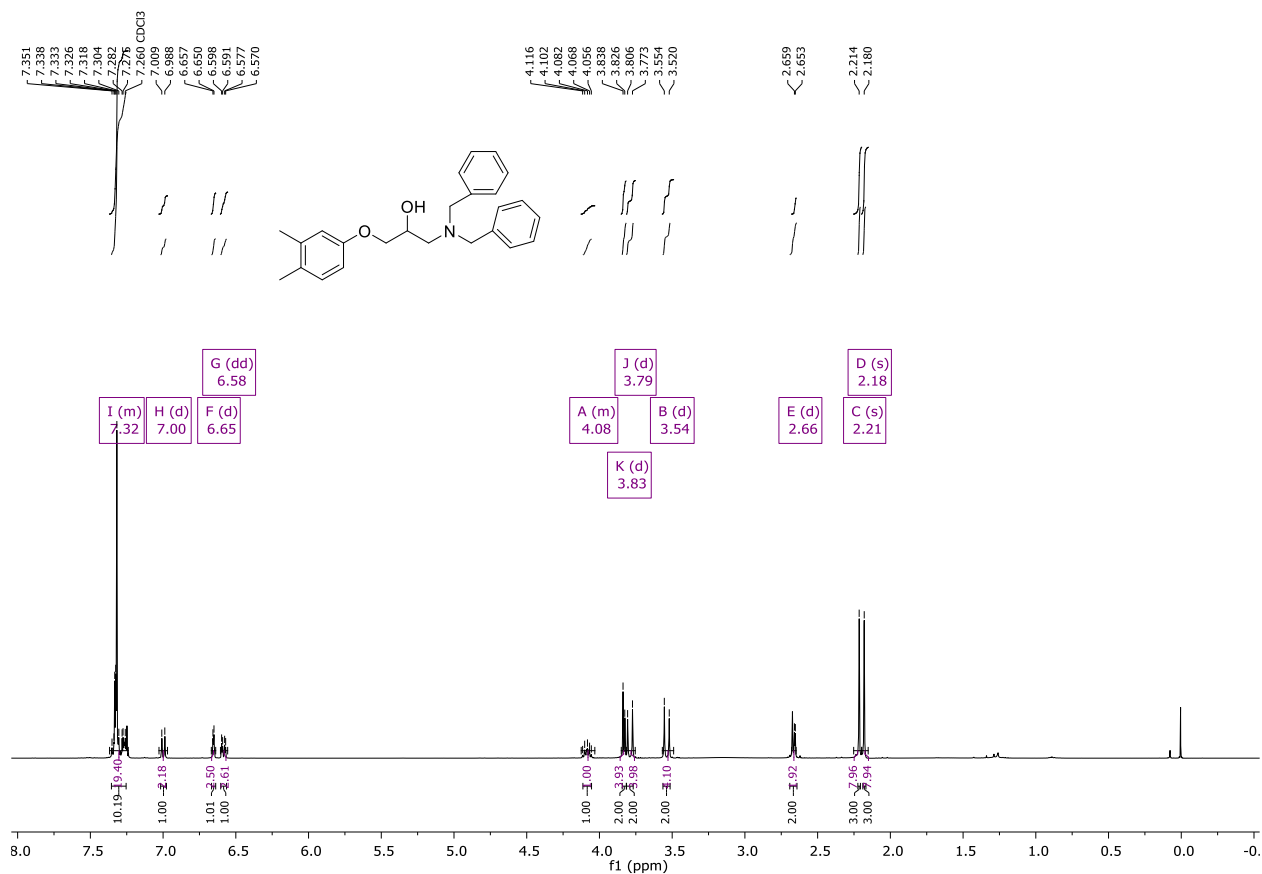

**1-(Dibenzylamino)-3-(3,4-dimethylphenoxy)propan-2-ol (13)**

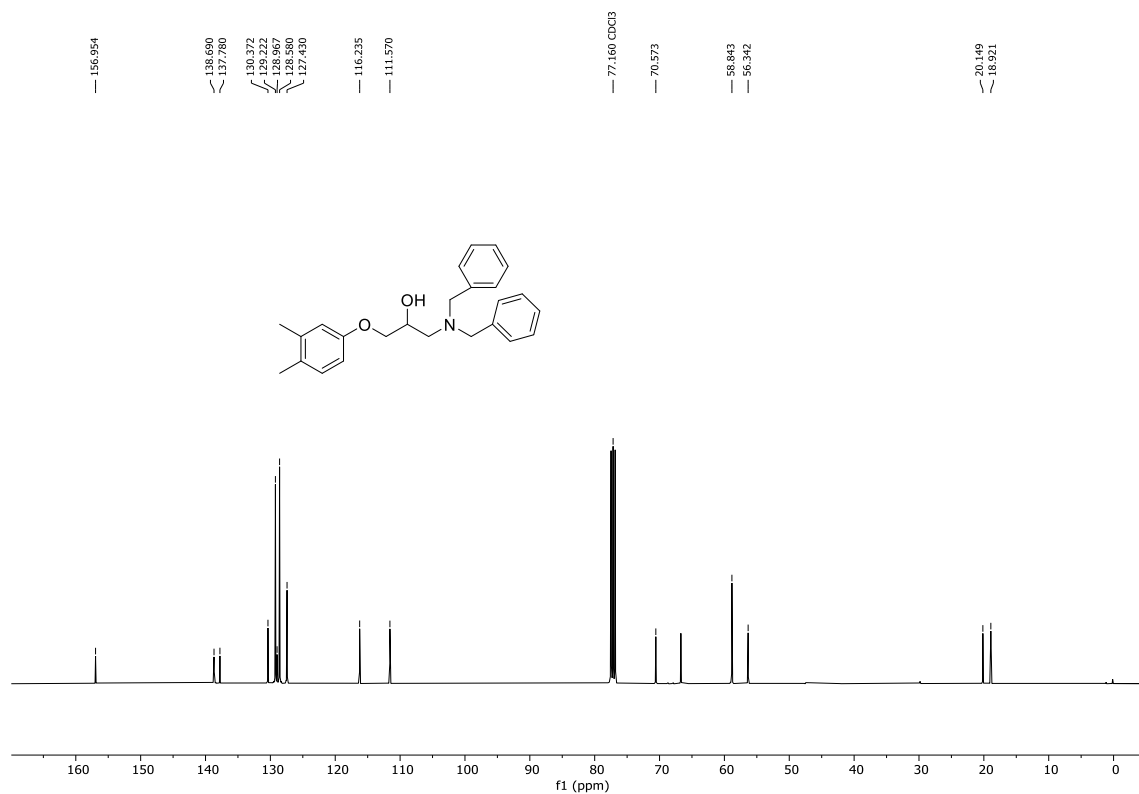

**1-(Dibenzylamino)-3-(3,4-dimethylphenoxy)propan-2-ol (13)**

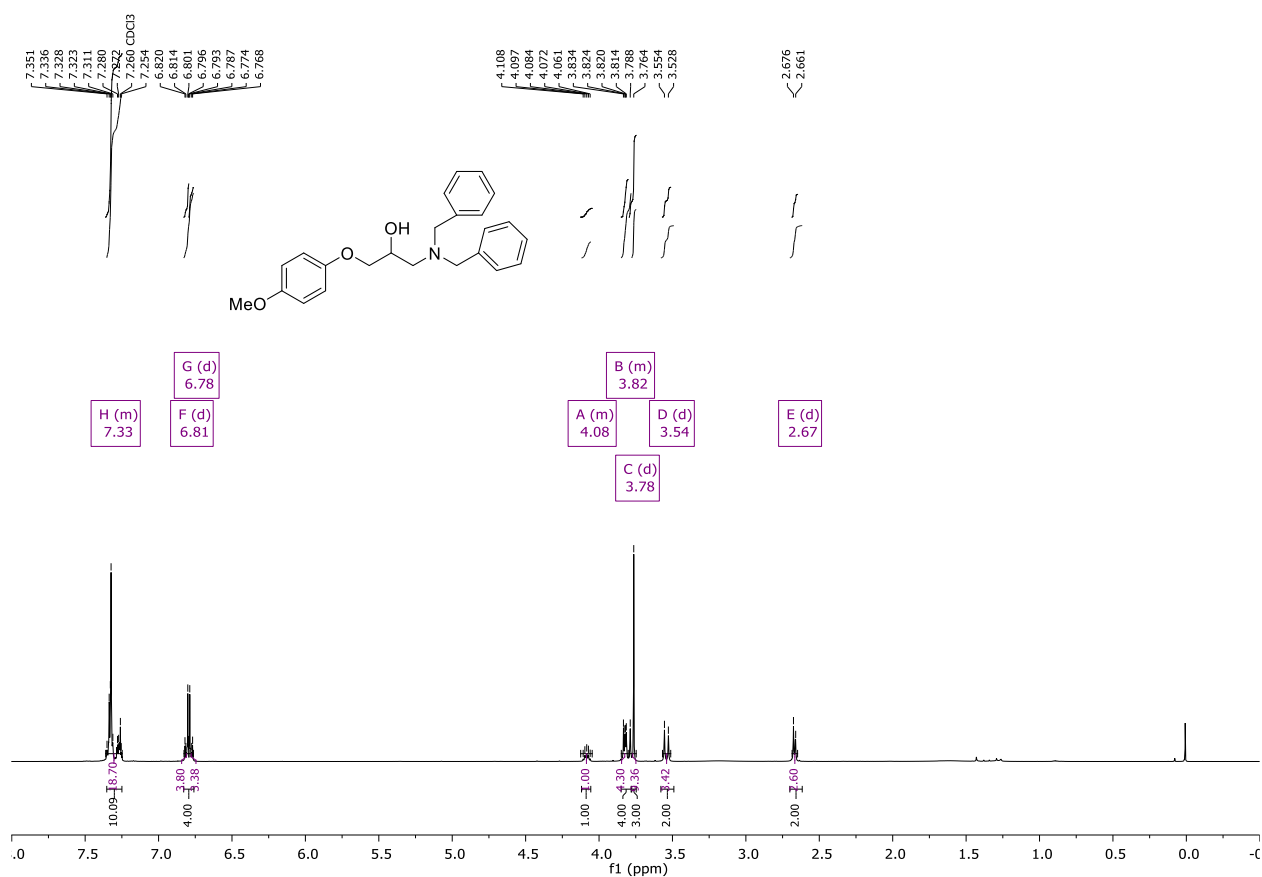

**1-(Dibenzylamino)-3-(4-methoxyphenoxy)propan-2-ol (14)**

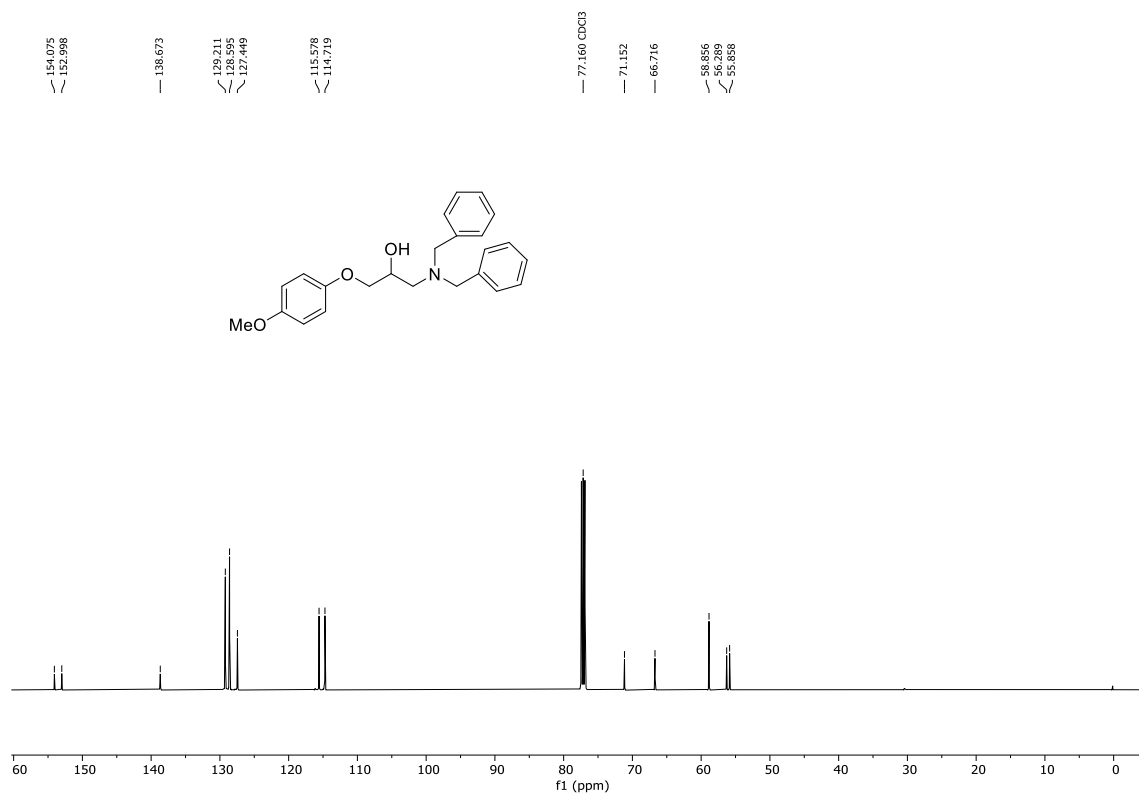

**1-(Dibenzylamino)-3-(4-methoxyphenoxy)propan-2-ol (14)**

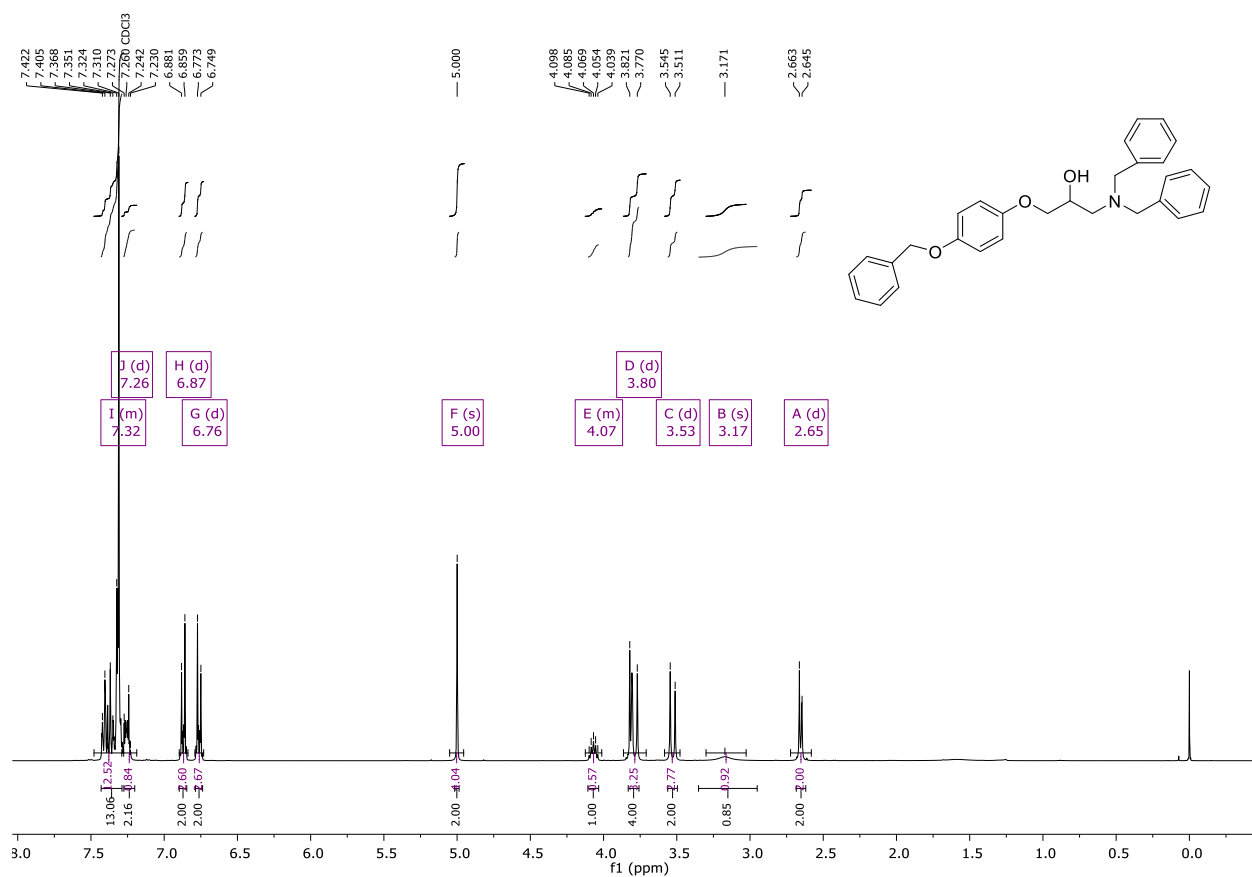

**1-[4-(Benzyloxy)phenoxy]-3-(dibenzylamino)propan-2-ol (15)**

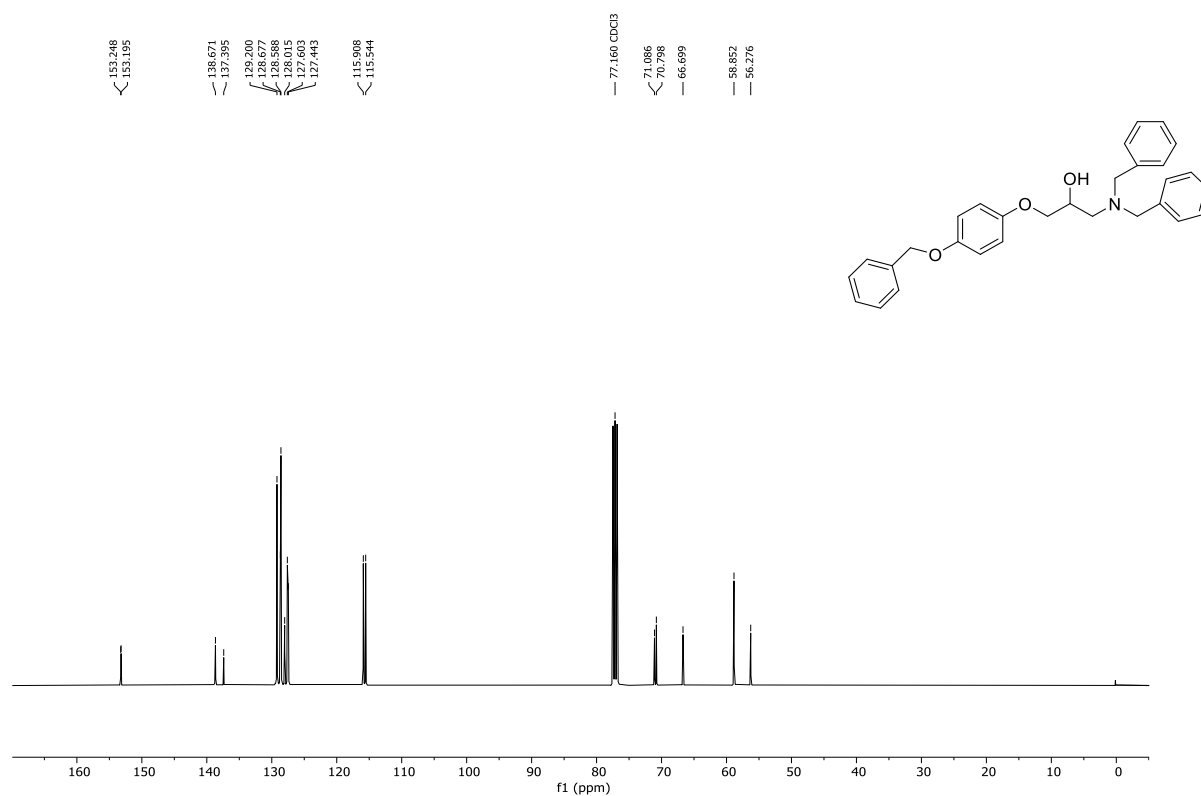

**1-[4-(Benzyloxy)phenoxy]-3-(dibenzylamino)propan-2-ol (15)**

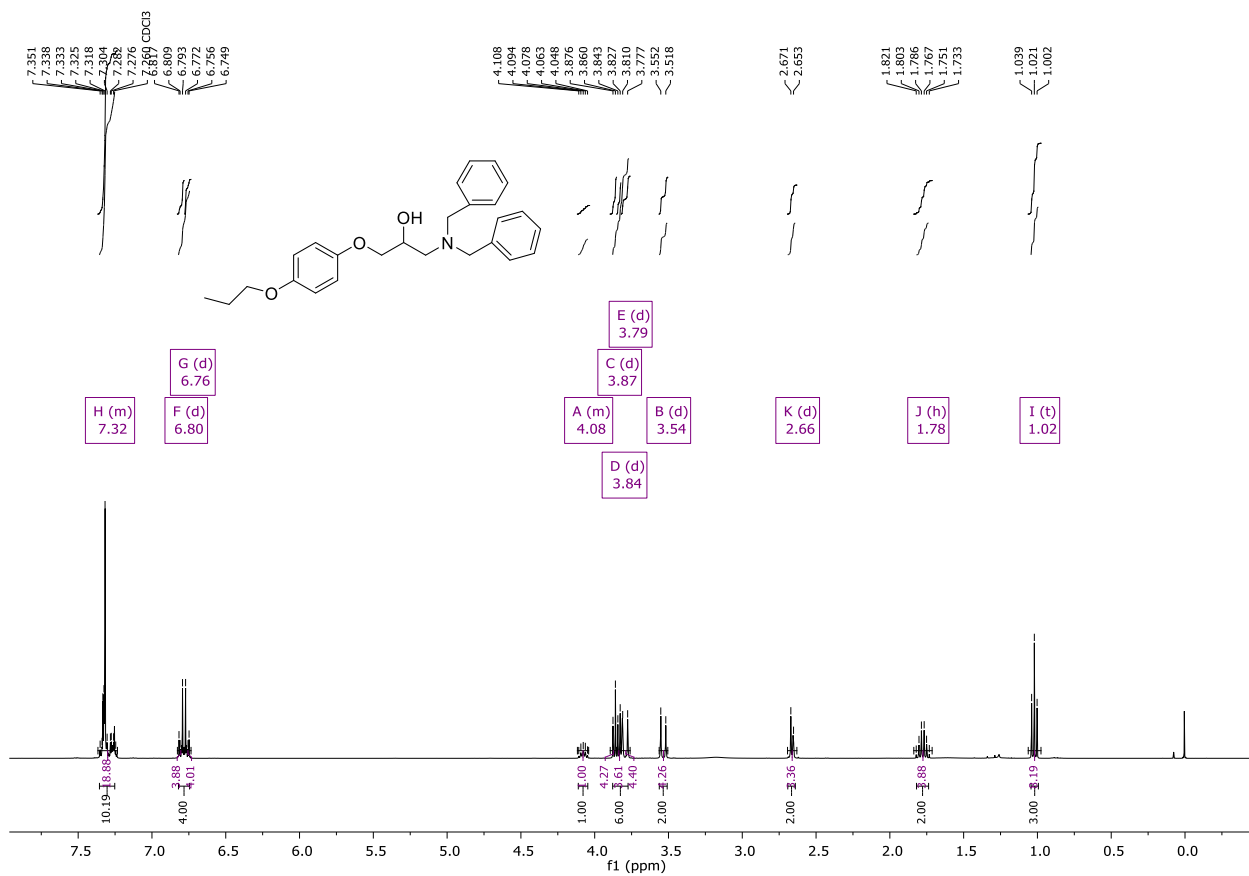

**1-(Dibenzylamino)-3-(4-propoxyphenoxy)propan-2-ol (16)**

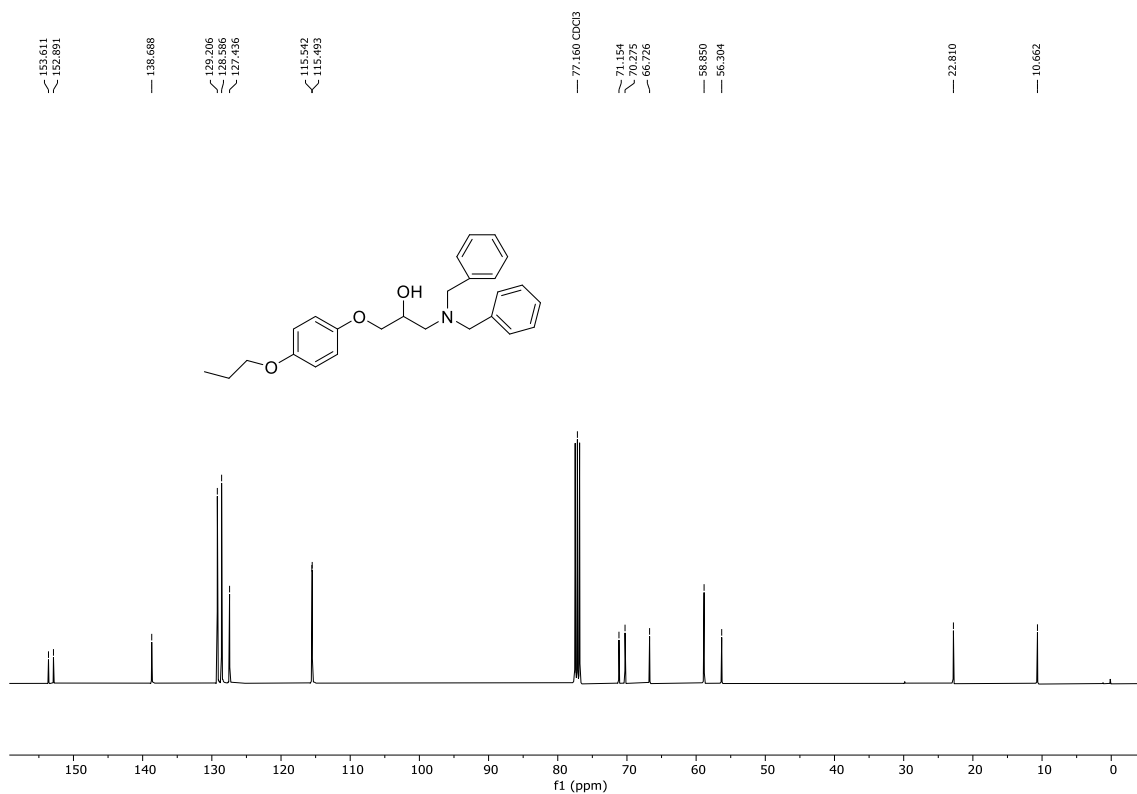

**1-(Dibenzylamino)-3-(4-propoxyphenoxy)propan-2-ol (16)**

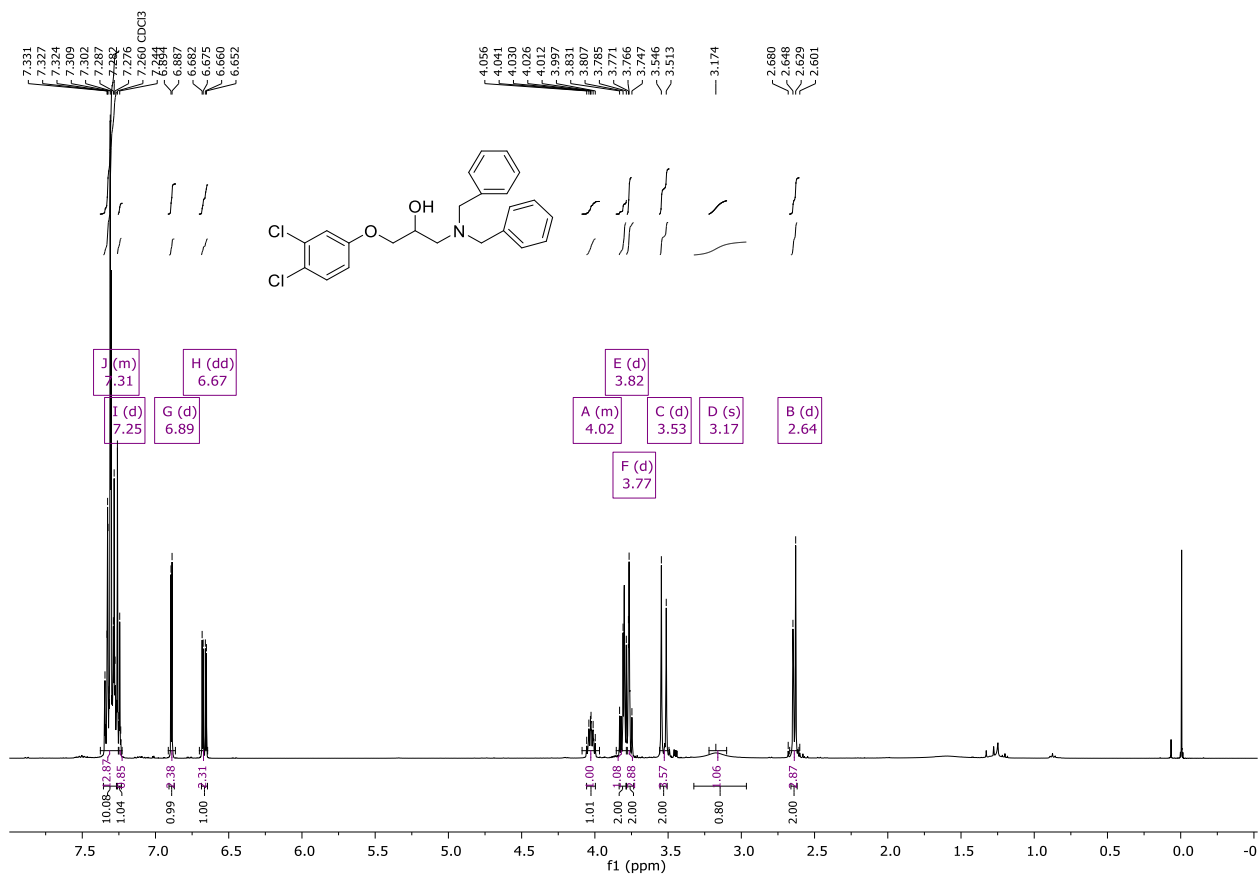

**1-(Dibenzylamino)-3-(3,4-dichlorophenoxy)propan-2-ol (17)**

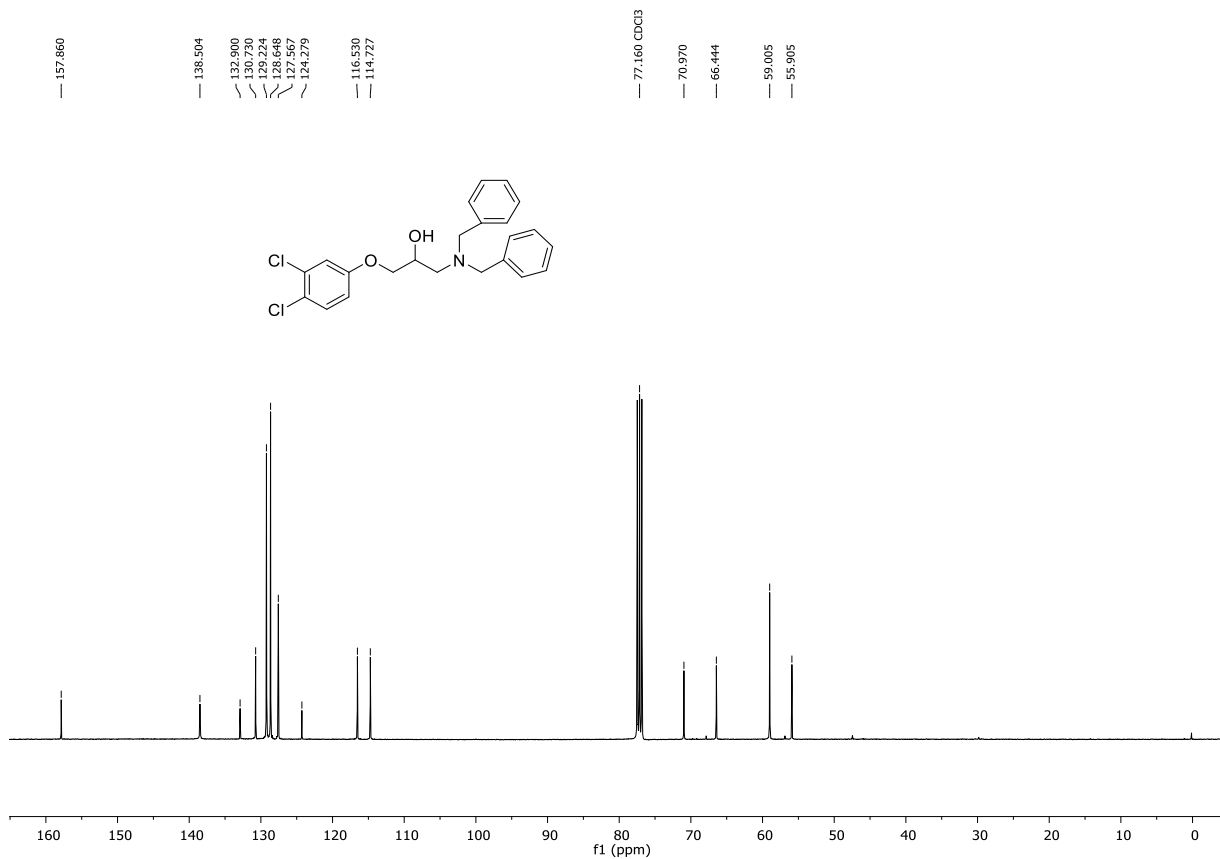

**1-(Dibenzylamino)-3-(3,4-dichlorophenoxy)propan-2-ol (17)**



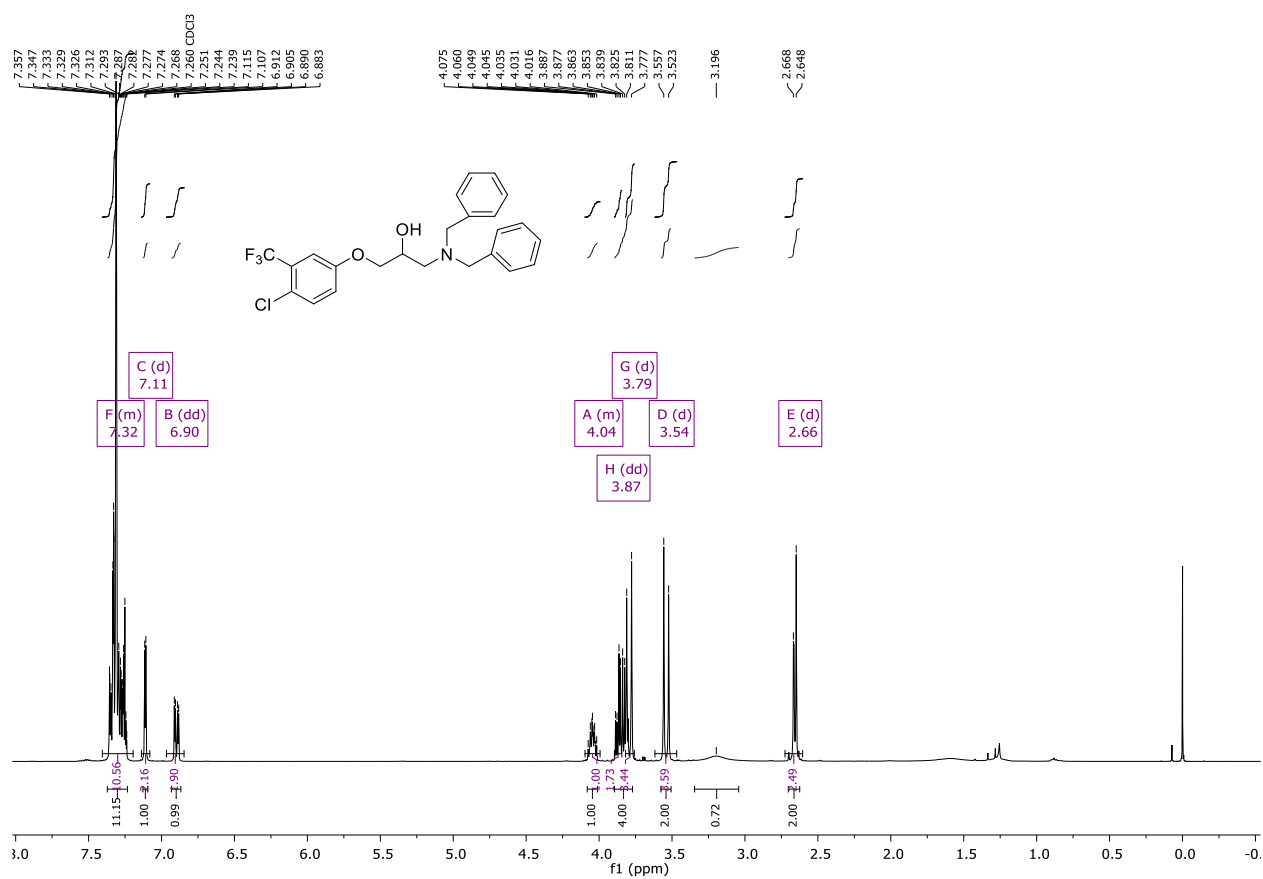

**1-[4-Chloro-3-(trifluoromethyl)phenoxy]-3-(dibenzylamino)propan-2-ol (18)**

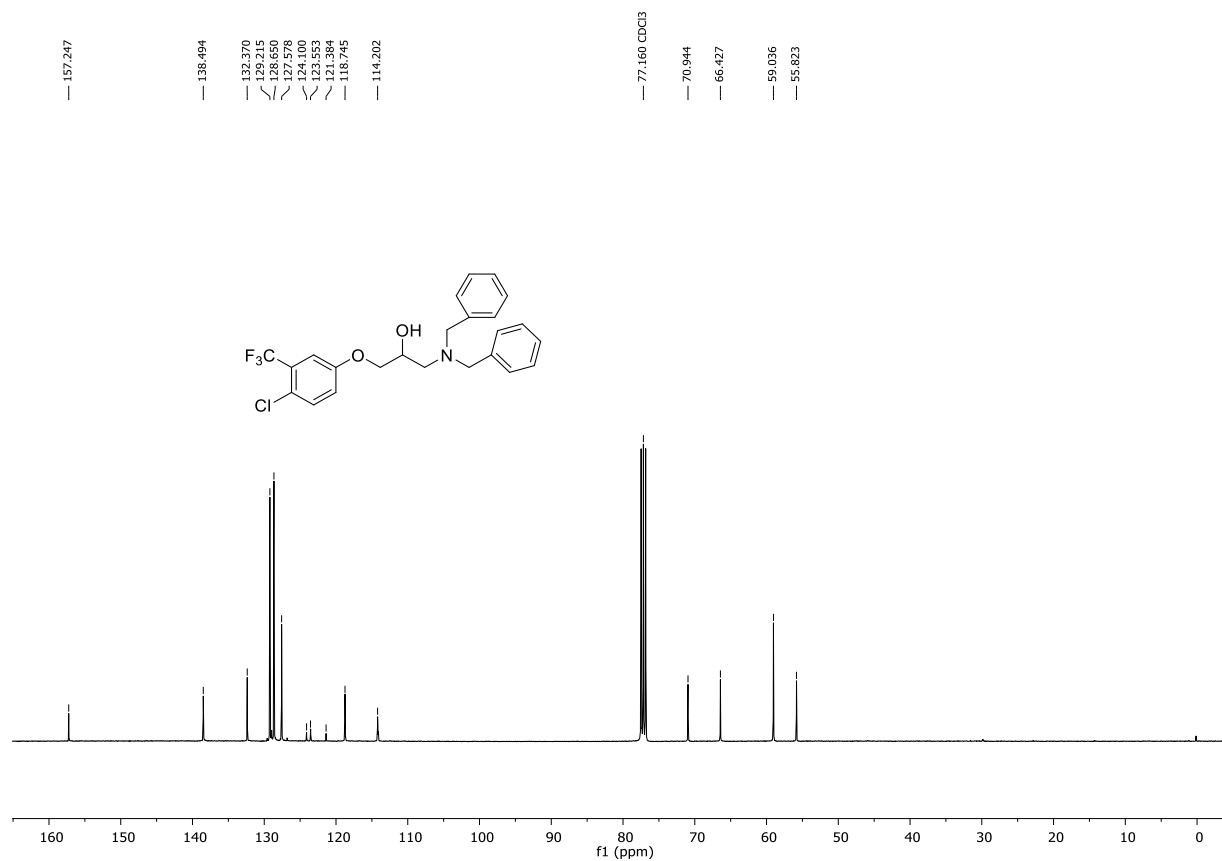

**1-[4-Chloro-3-(trifluoromethyl)phenoxy]-3-(dibenzylamino)propan-2-ol (18)**

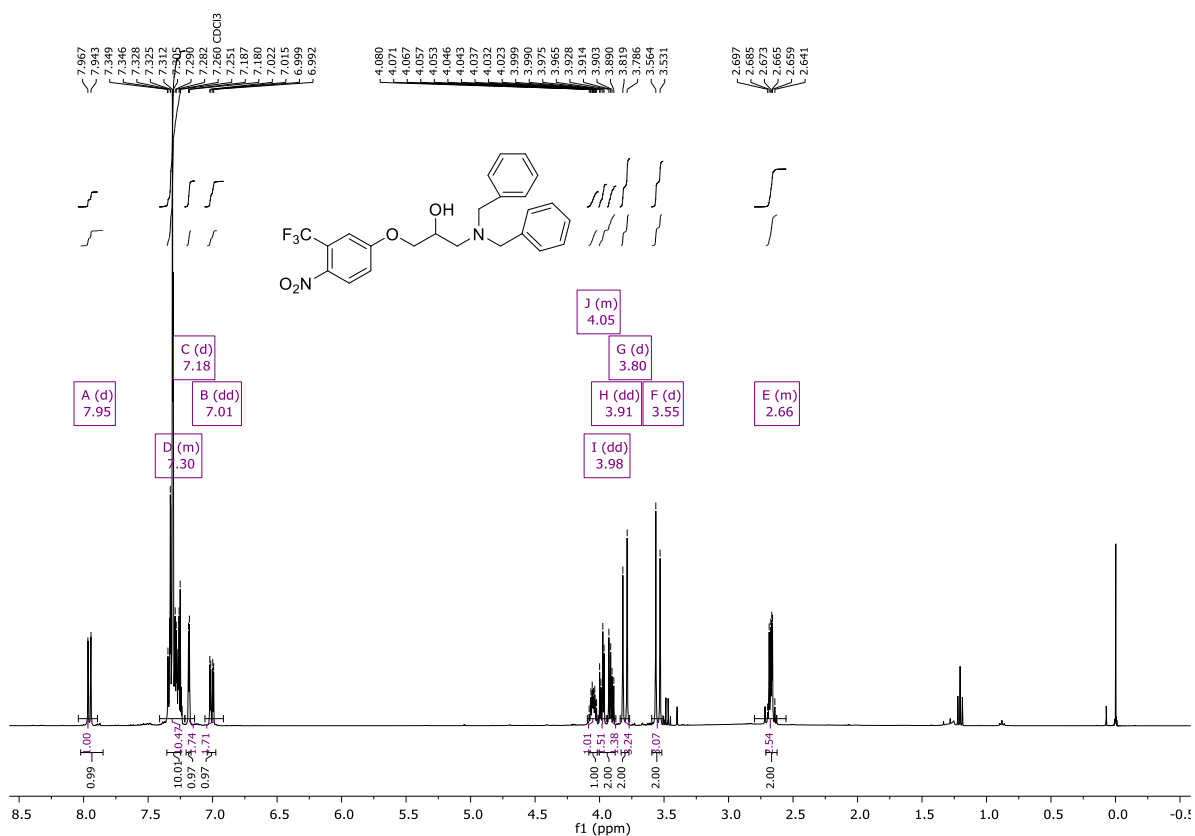

**1-(Dibenzylamino)-3-[4-nitro-3-(trifluoromethyl)phenoxy]propan-2-ol (19)**

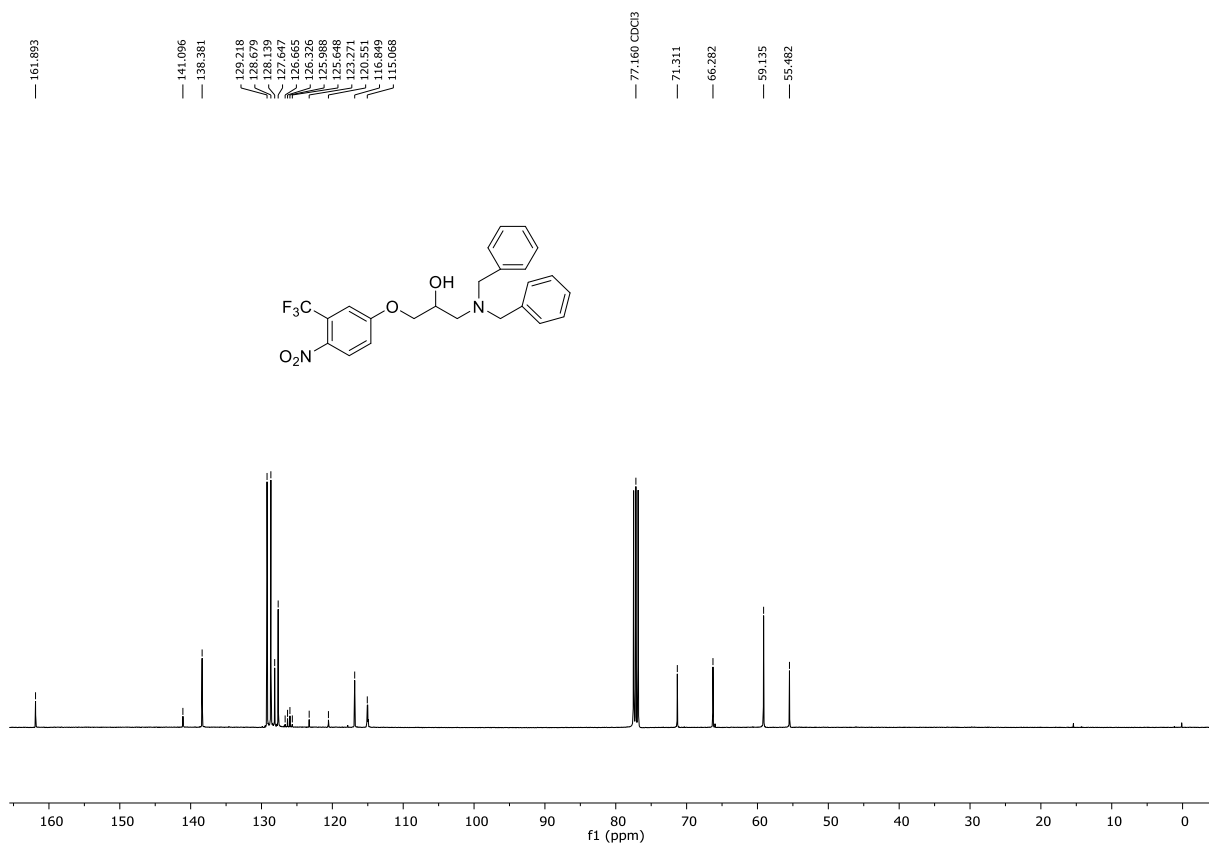

**1-(Dibenzylamino)-3-[4-nitro-3-(trifluoromethyl)phenoxy]propan-2-ol (19)**

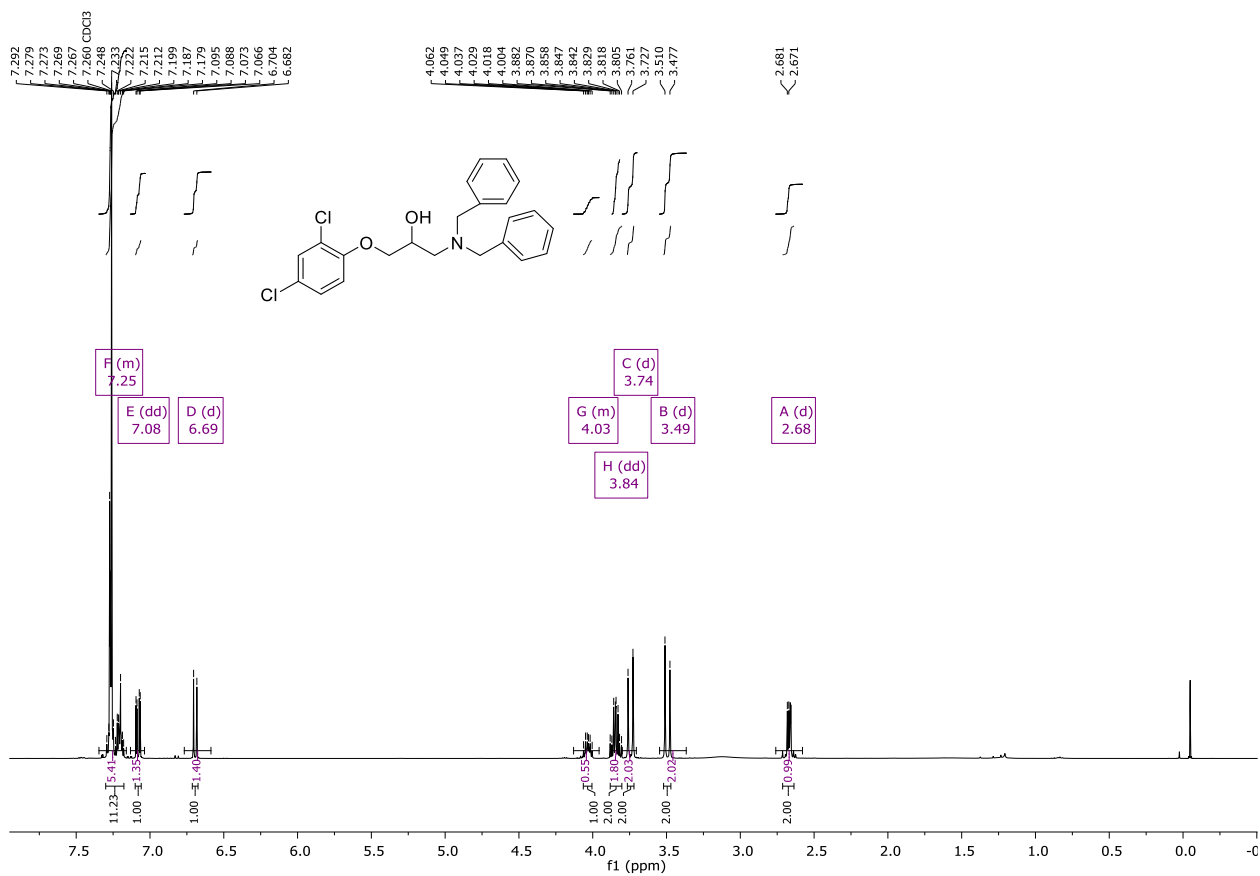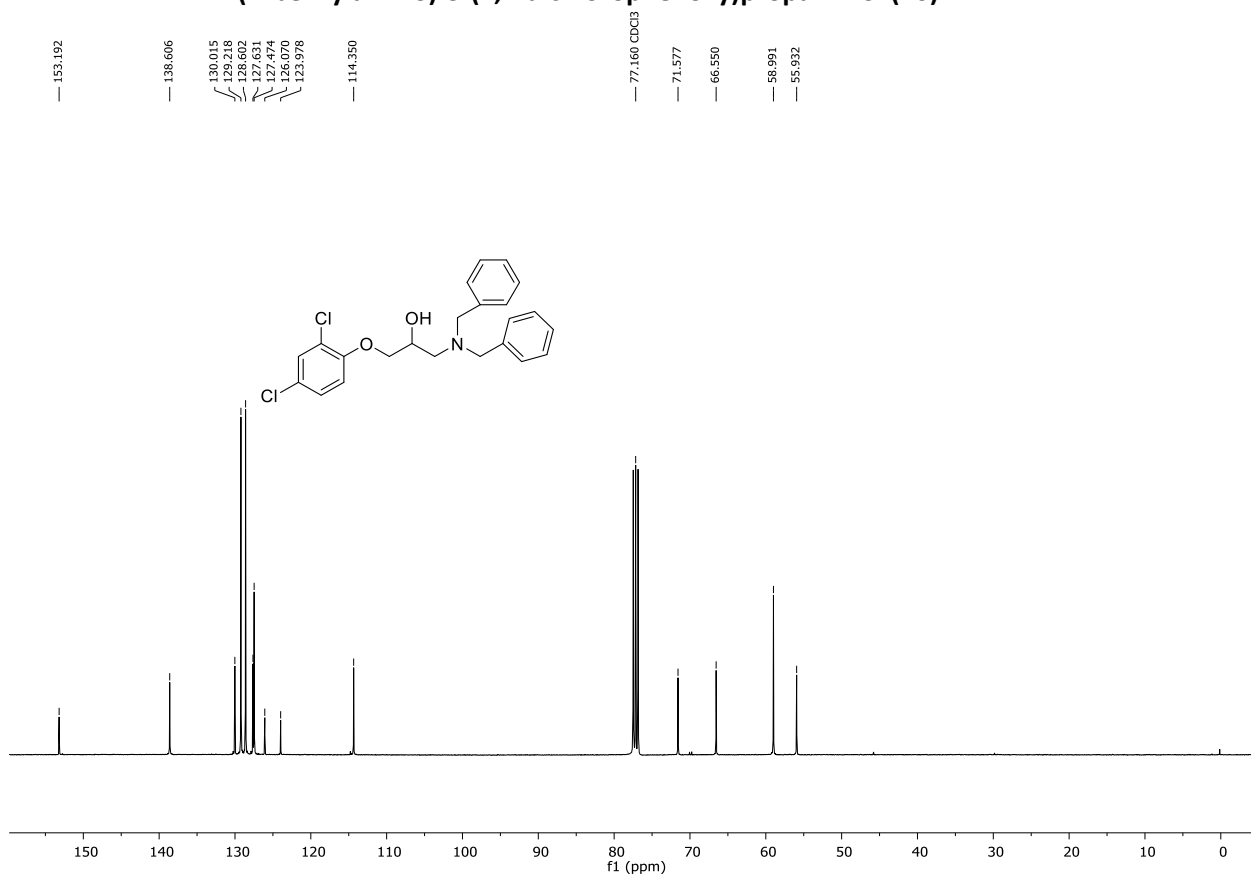

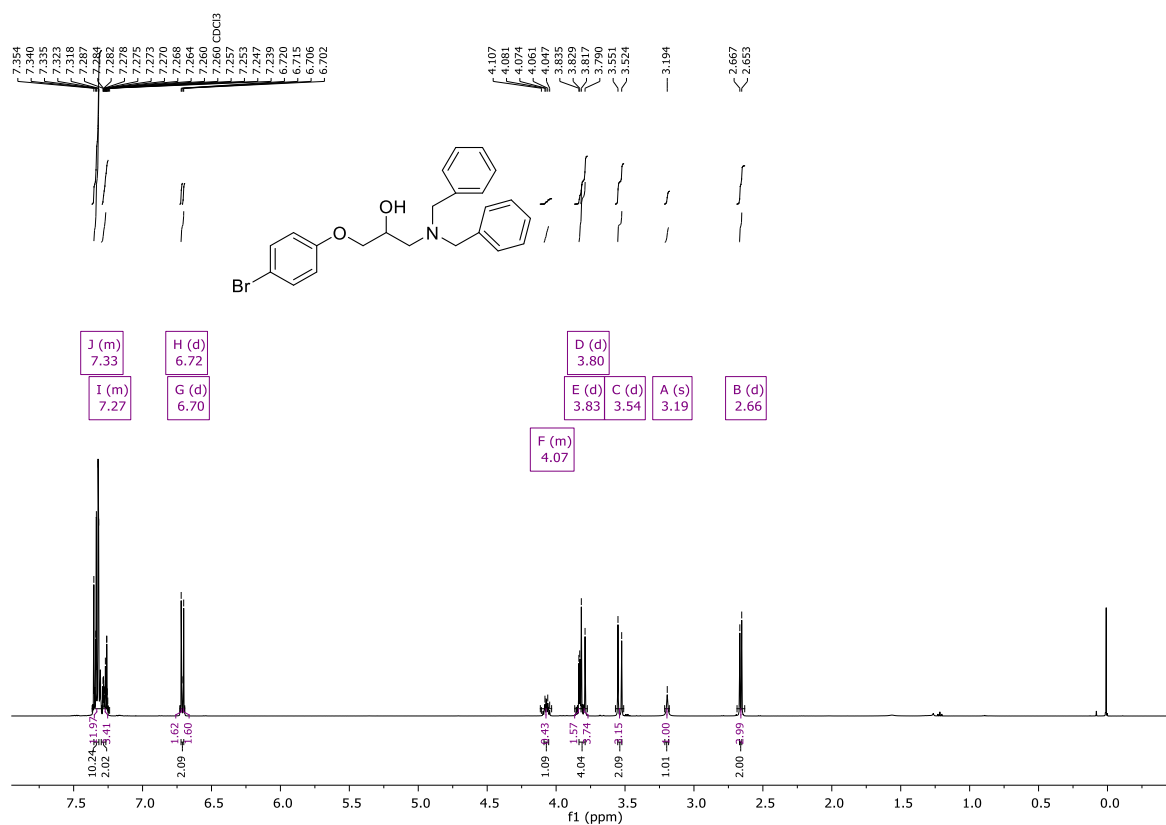

**1-(4-Bromophenoxy)-3-(dibenzylamino)propan-2-ol (21)**

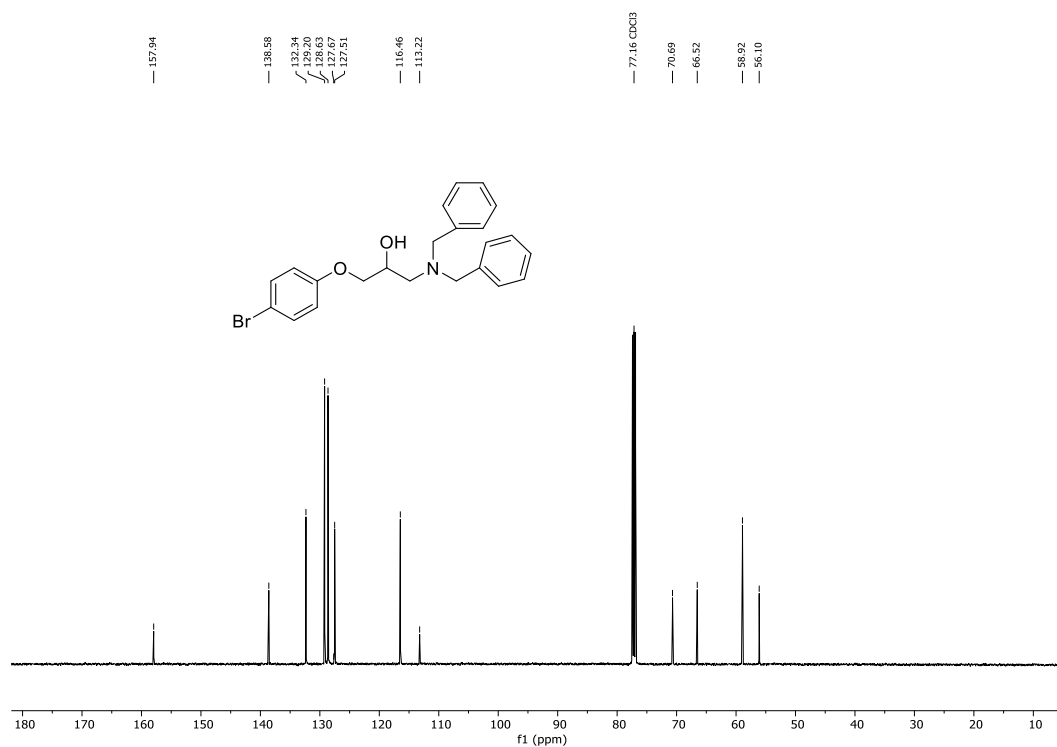

**1-(4-Bromophenoxy)-3-(dibenzylamino)propan-2-ol (21)**

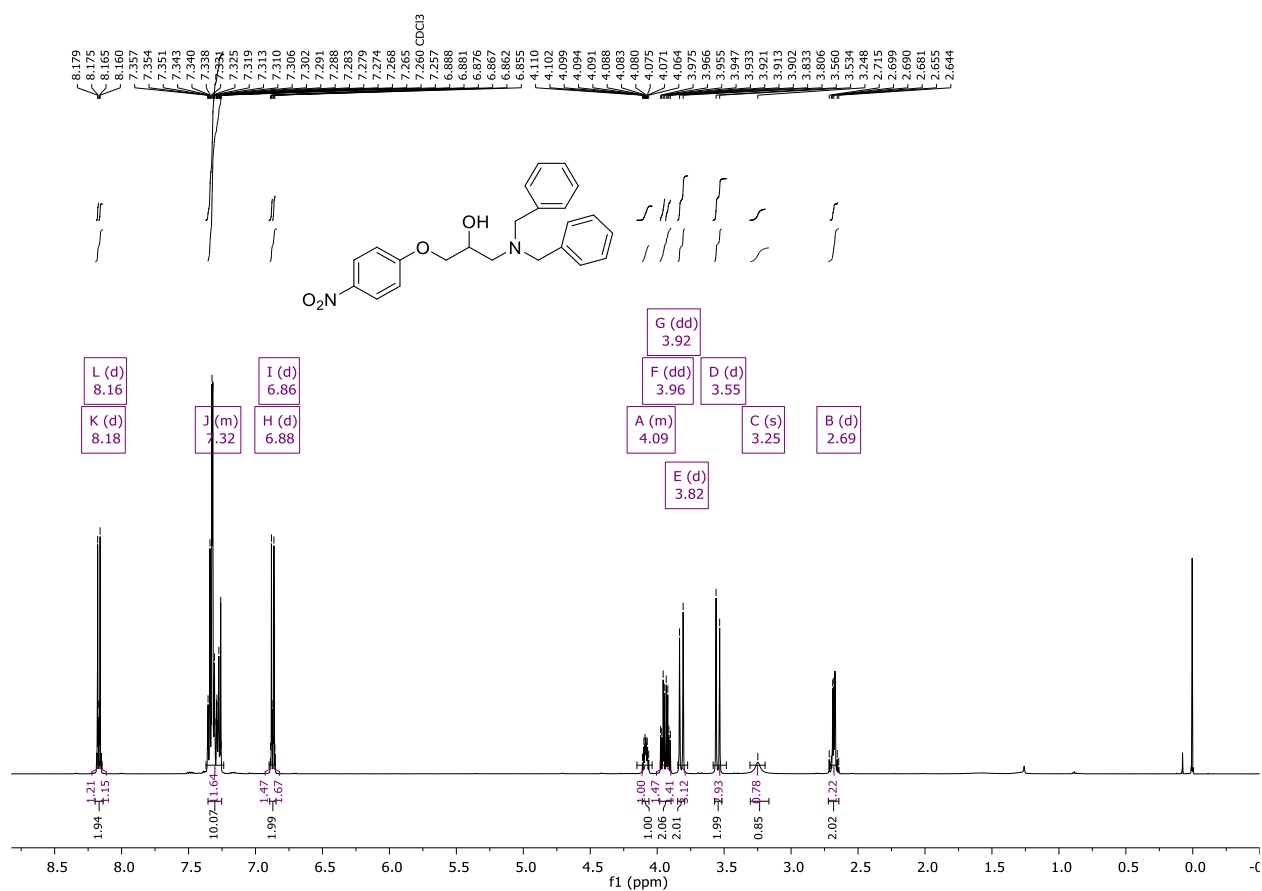

1-(Dibenzylamino)-3-(4-nitrophenoxy)propan-2-ol (22)

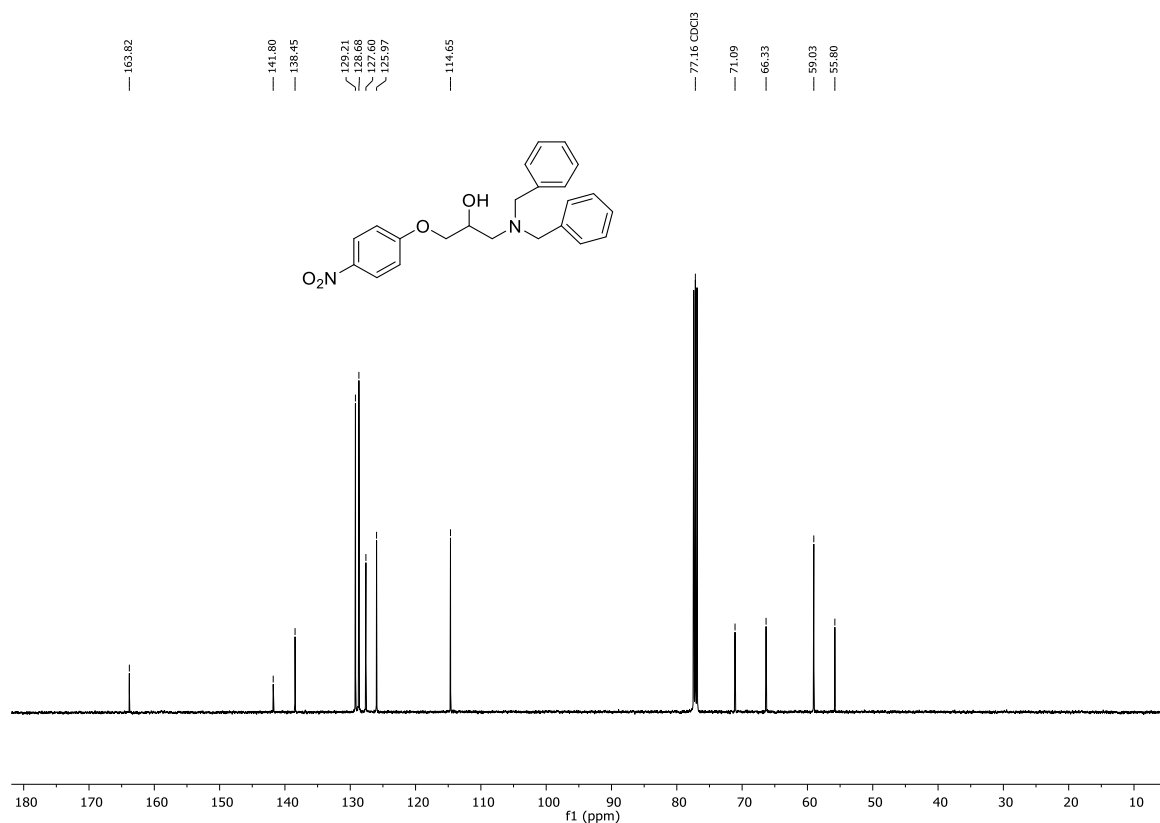

1-(Dibenzylamino)-3-(4-nitrophenoxy)propan-2-ol (22)

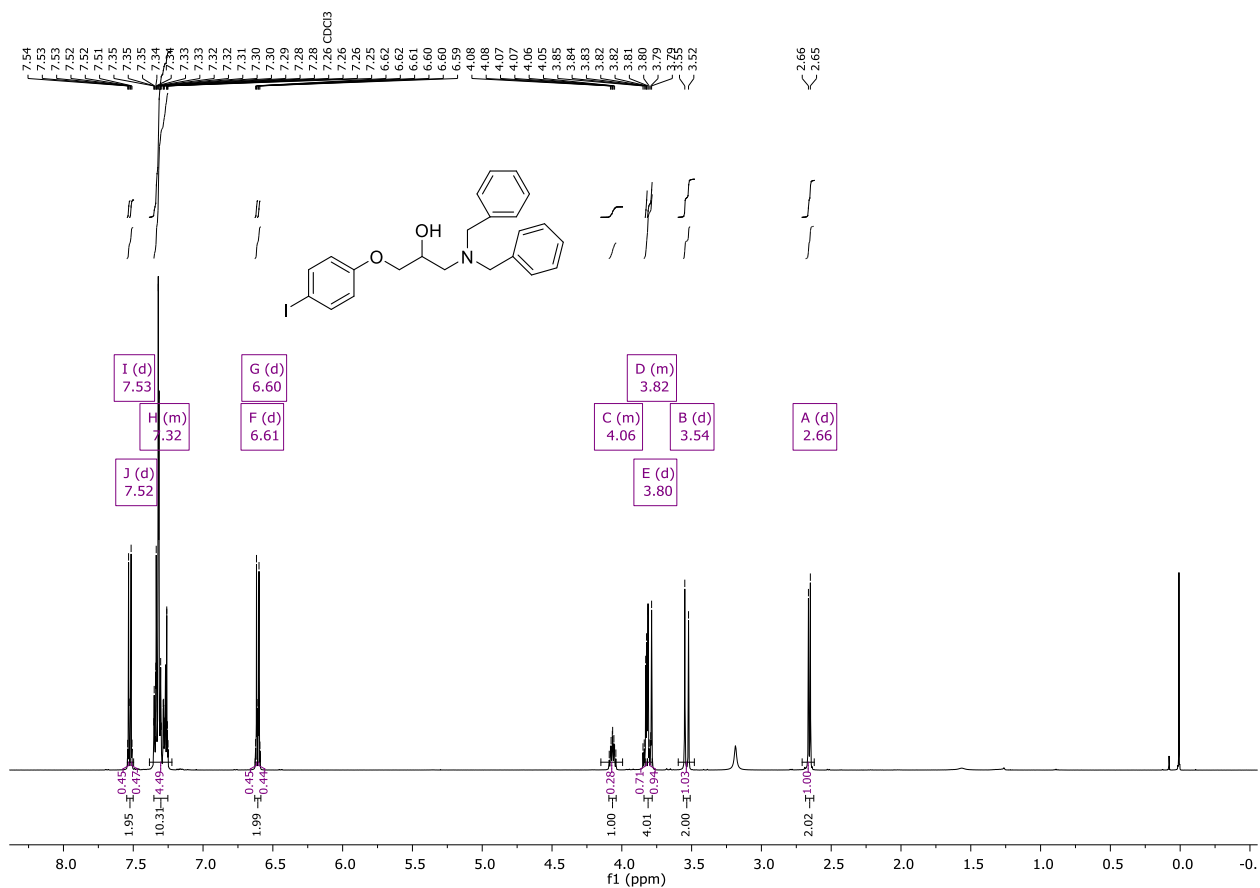

**1-(Dibenzylamino)-3-(4-iodophenoxy)propan-2-ol (23)**

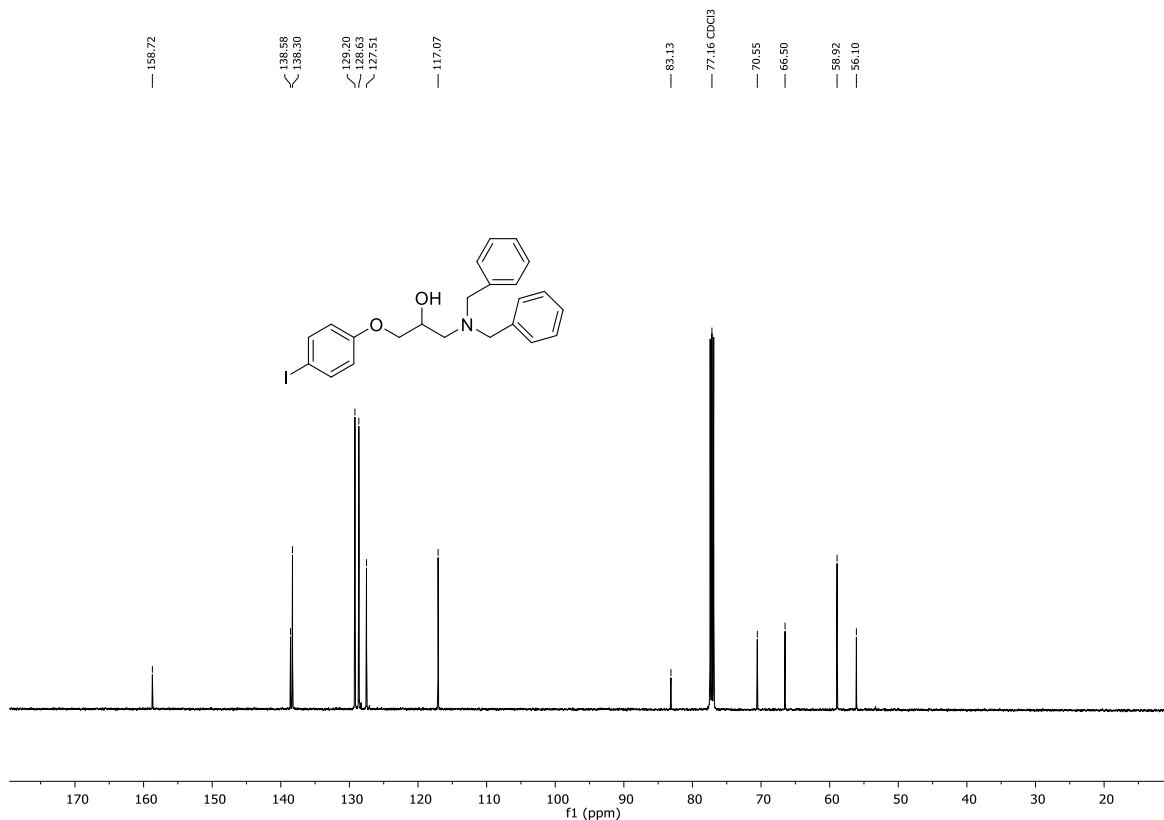

**1-(Dibenzylamino)-3-(4-iodophenoxy)propan-2-ol (23)**

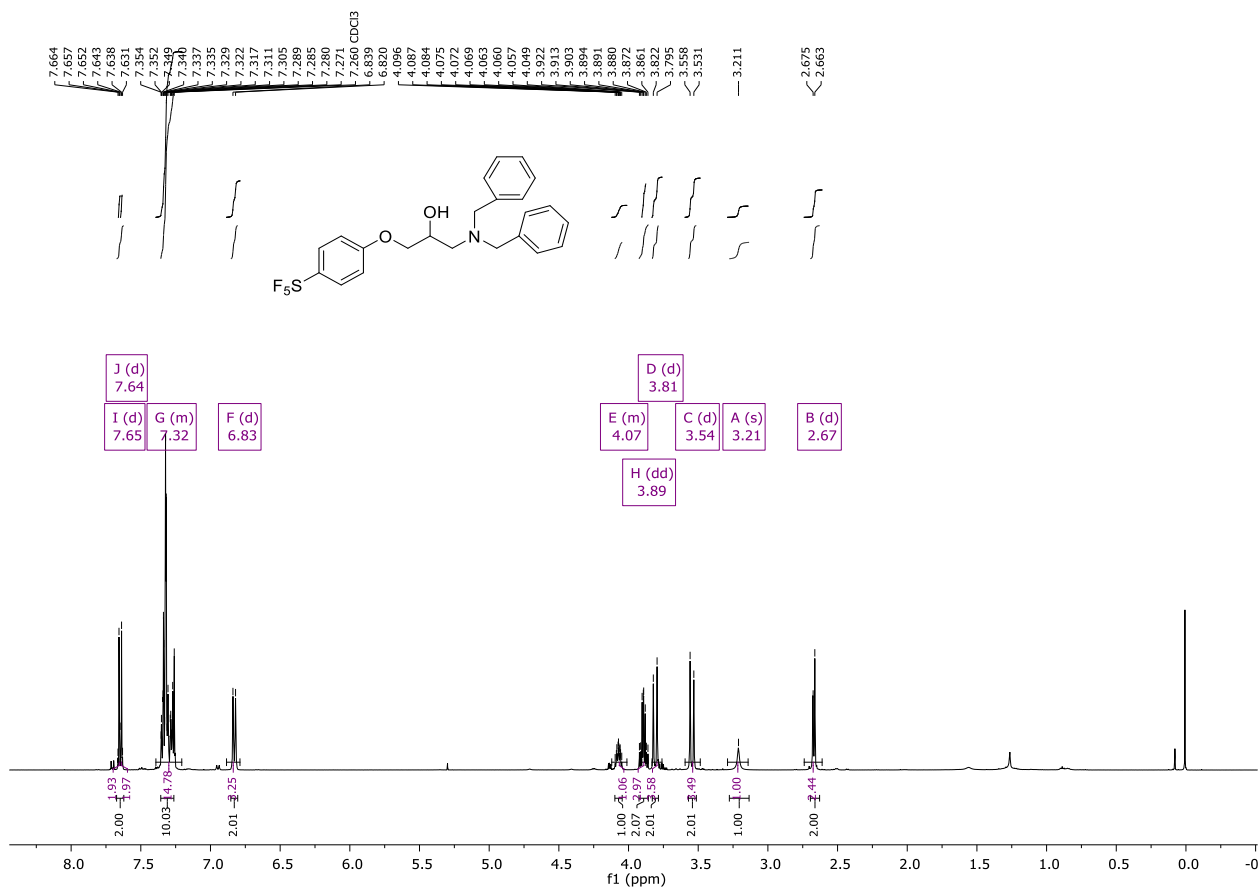

**1-(Dibenzylamino)-3-[4-(pentafluoro-λ<sup>6</sup>-sulfaneyl)phenoxy]propan-2-ol (24)**

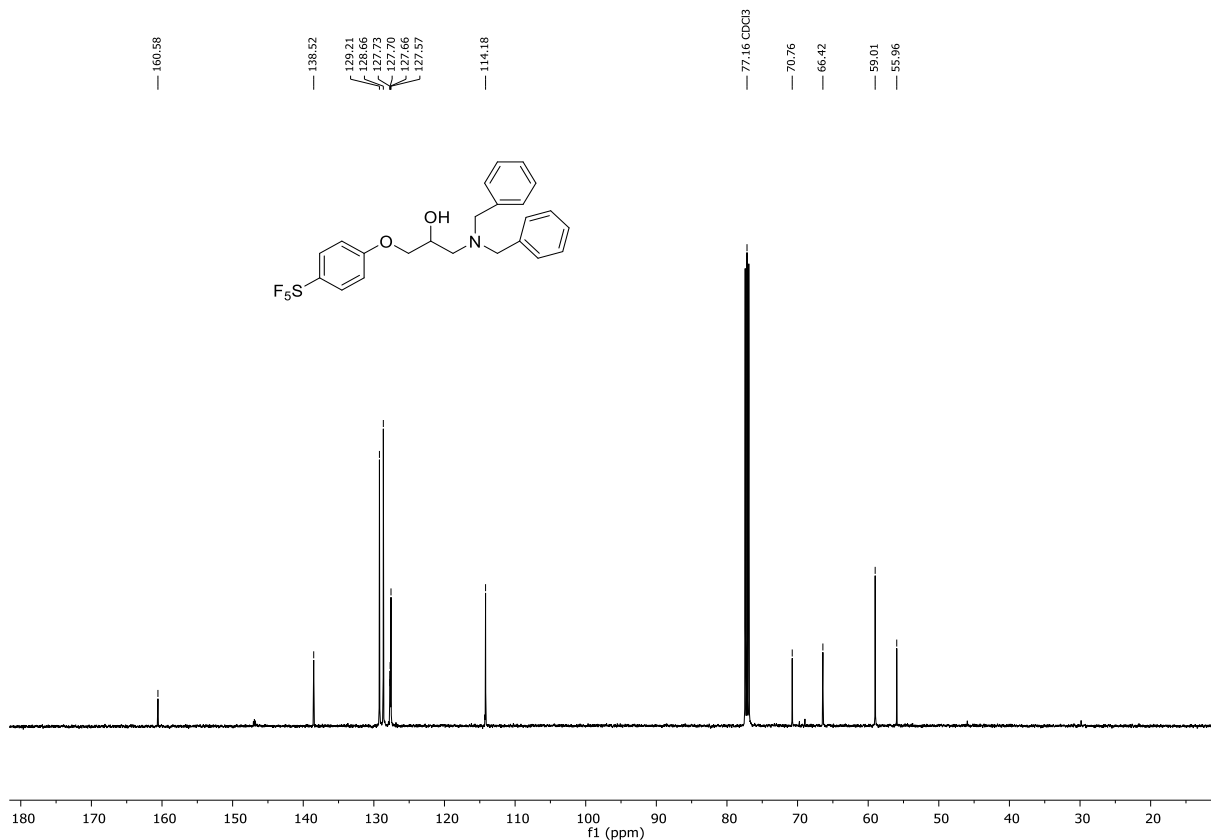

**1-(Dibenzylamino)-3-[4-(pentafluoro-λ<sup>6</sup>-sulfaneyl)phenoxy]propan-2-ol (24)**

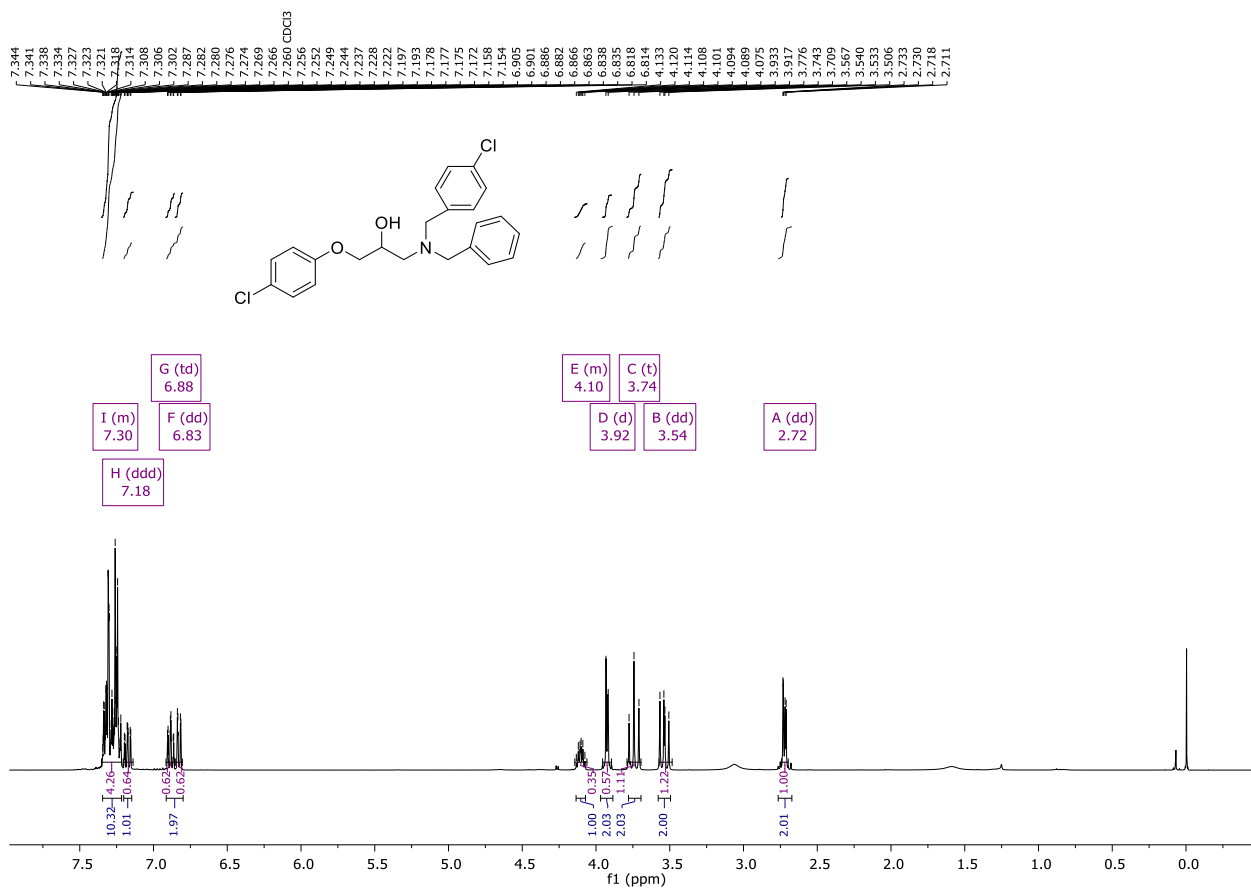

**1-[Benzyl(4-chlorobenzyl)amino]-3-(4-chlorophenoxy)propan-2-ol (25)**

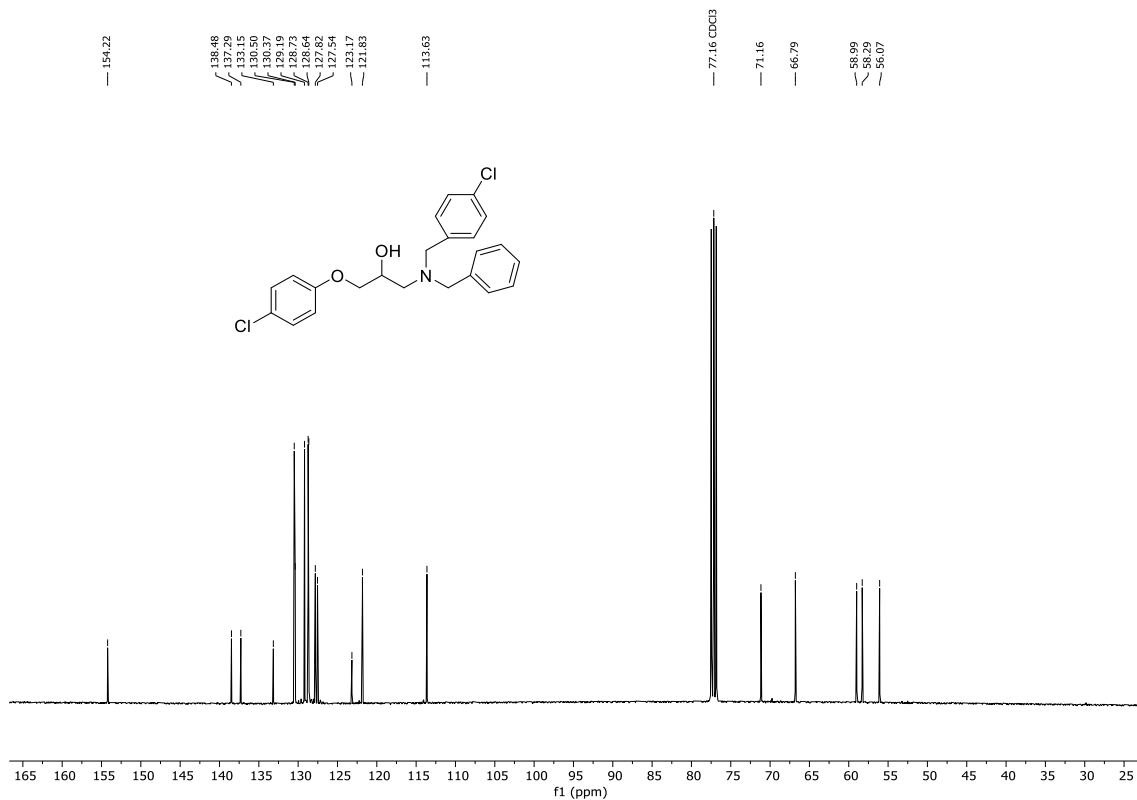

**1-[Benzyl(4-chlorobenzyl)amino]-3-(4-chlorophenoxy)propan-2-ol (25)**



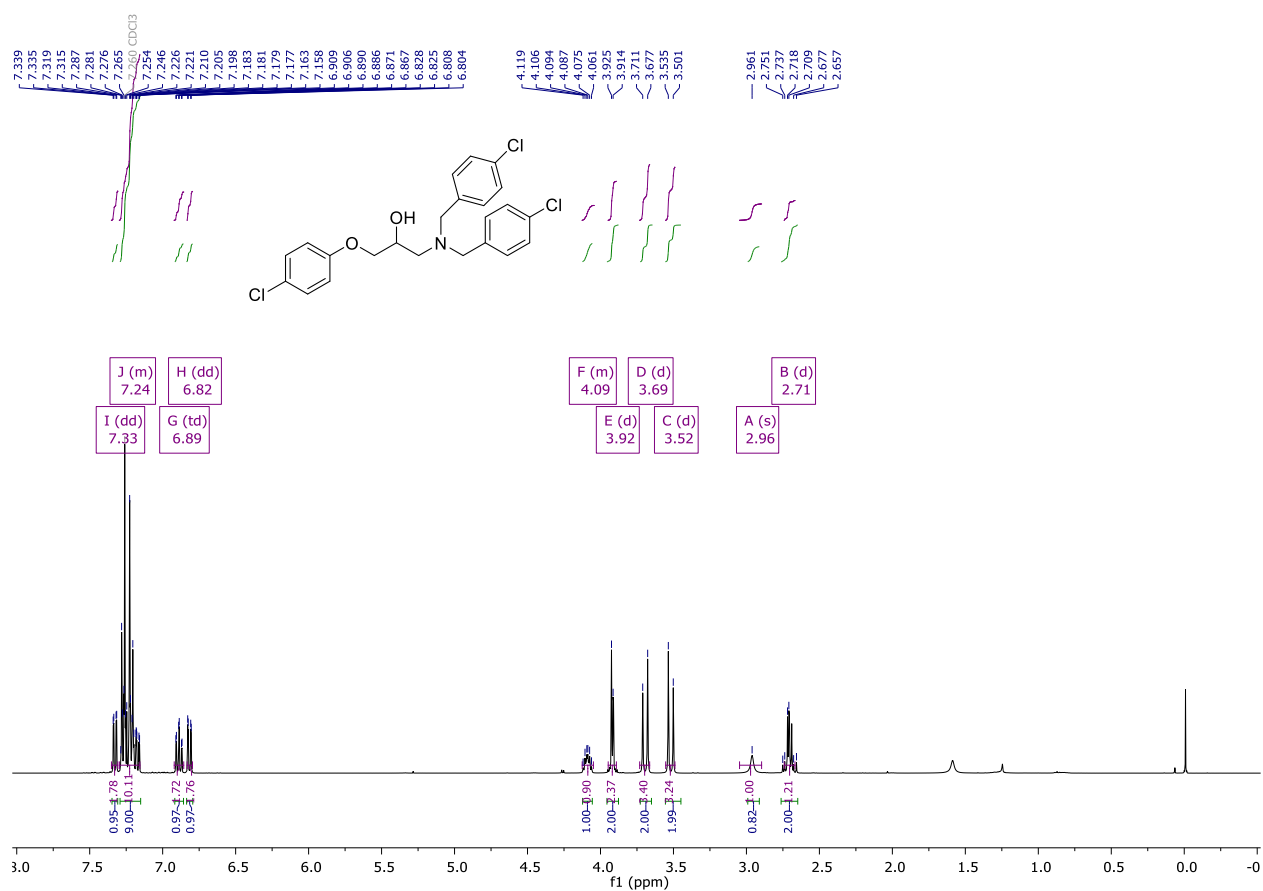

**1-[Bis(4-chlorobenzyl)amino]-3-(4-chlorophenoxy)propan-2-ol (26)**

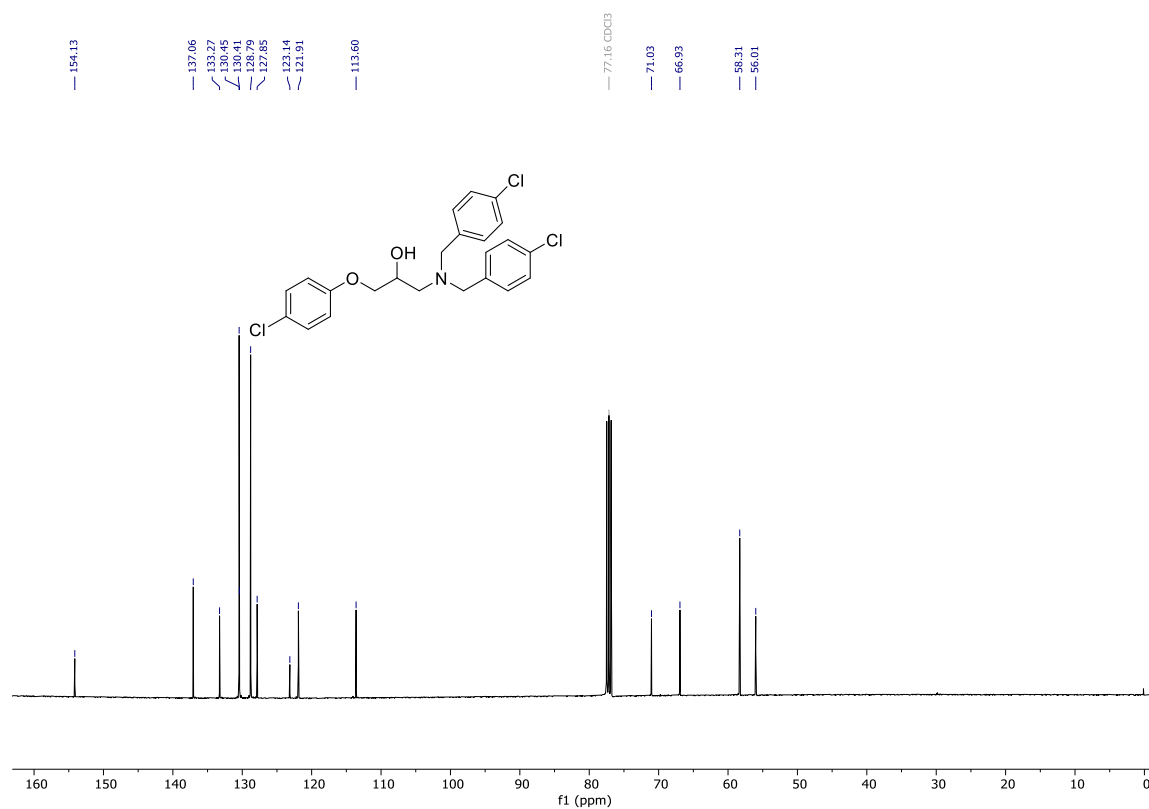

**1-[Bis(4-chlorobenzyl)amino]-3-(4-chlorophenoxy)propan-2-ol (26)**

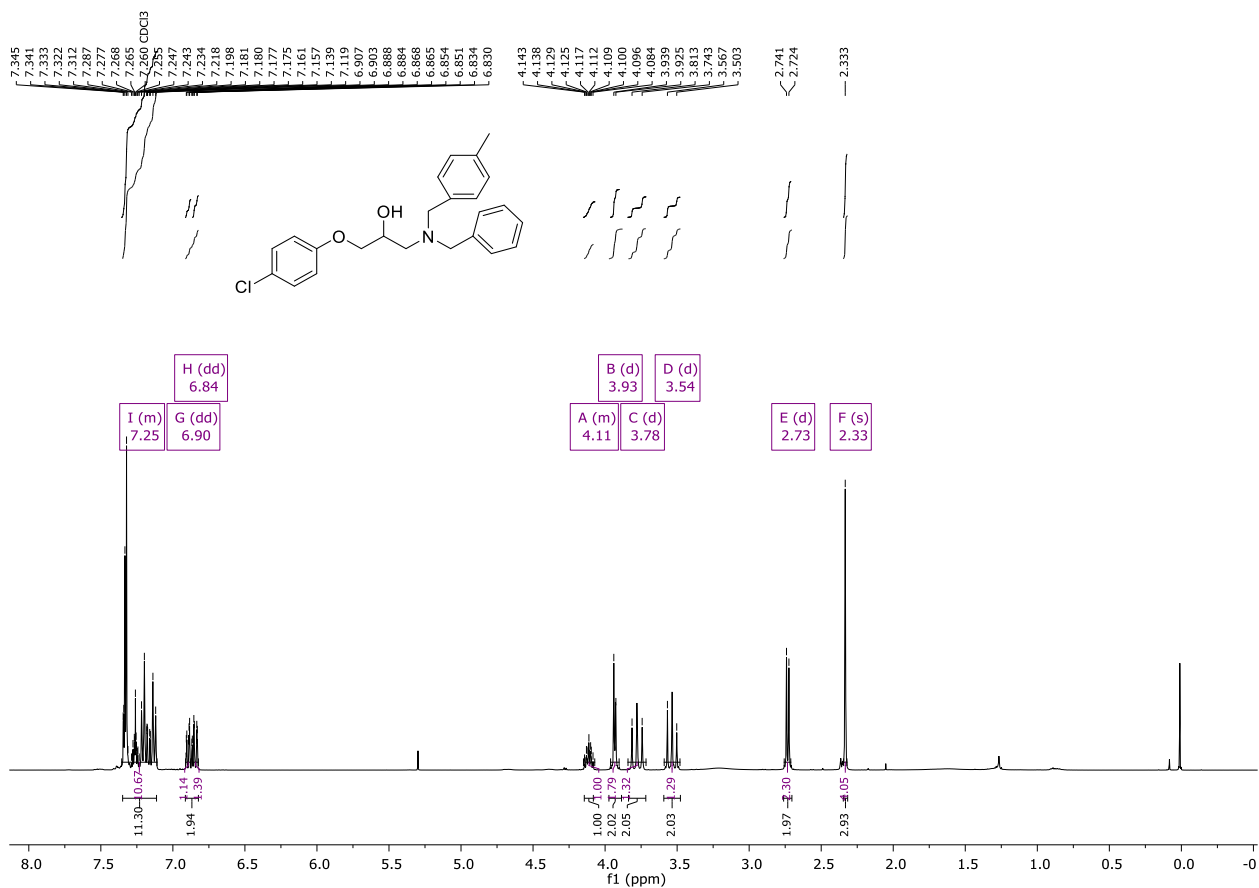

**1-[Benzyl(4-methylbenzyl)amino]-3-(4-chlorophenoxy)propan-2-ol (27)**

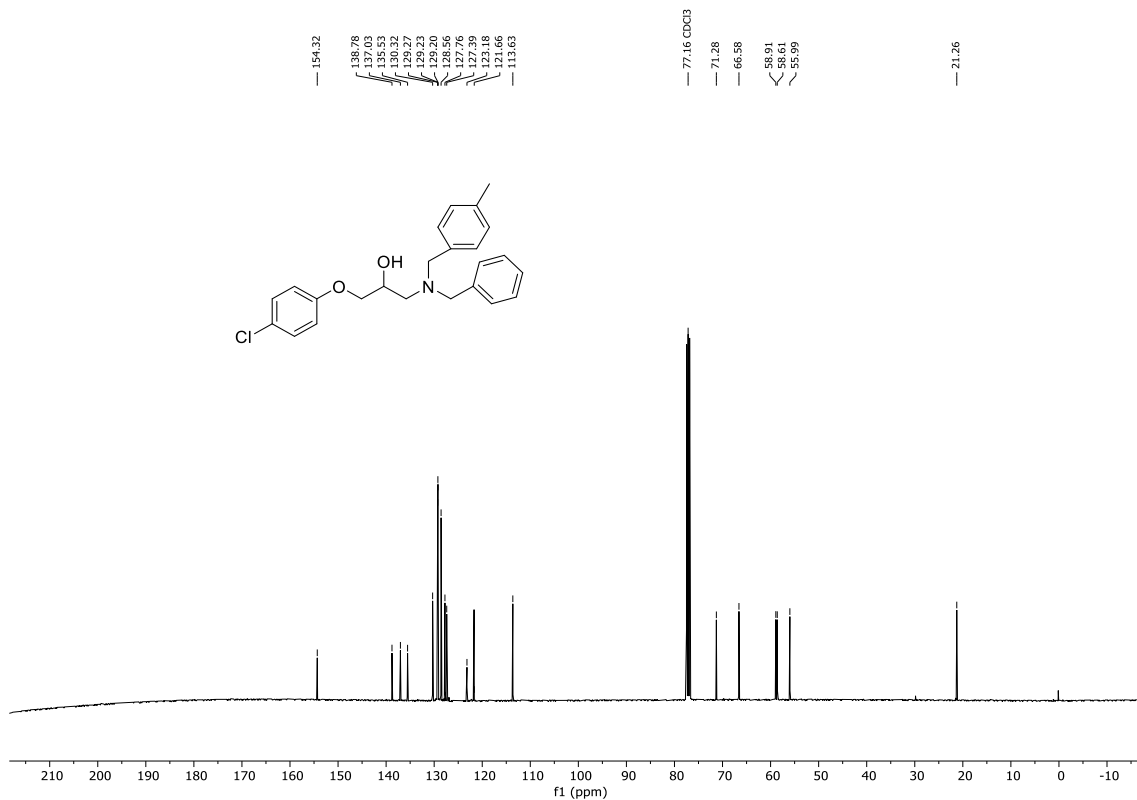

**1-[Benzyl(4-methylbenzyl)amino]-3-(4-chlorophenoxy)propan-2-ol (27)**

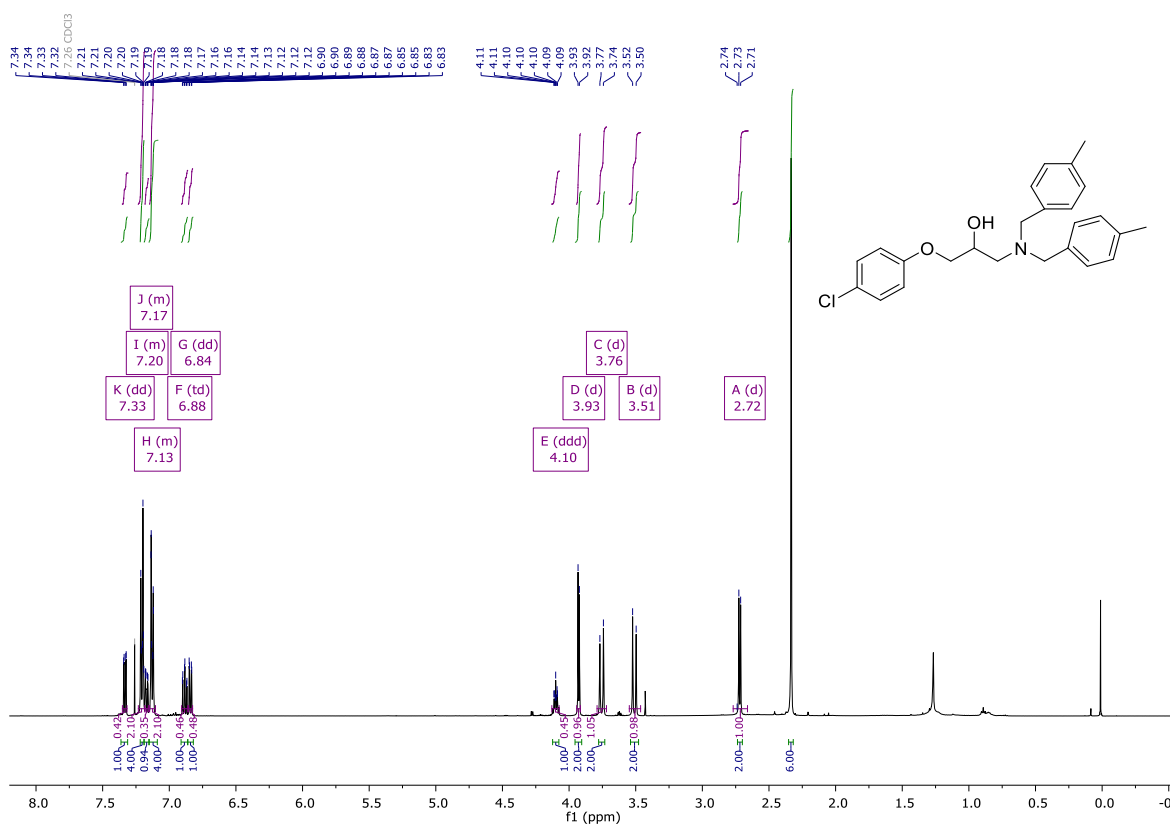

**1-[Bis(4-methylbenzyl)amino]-3-(4-chlorophenoxy)propan-2-ol (28)**

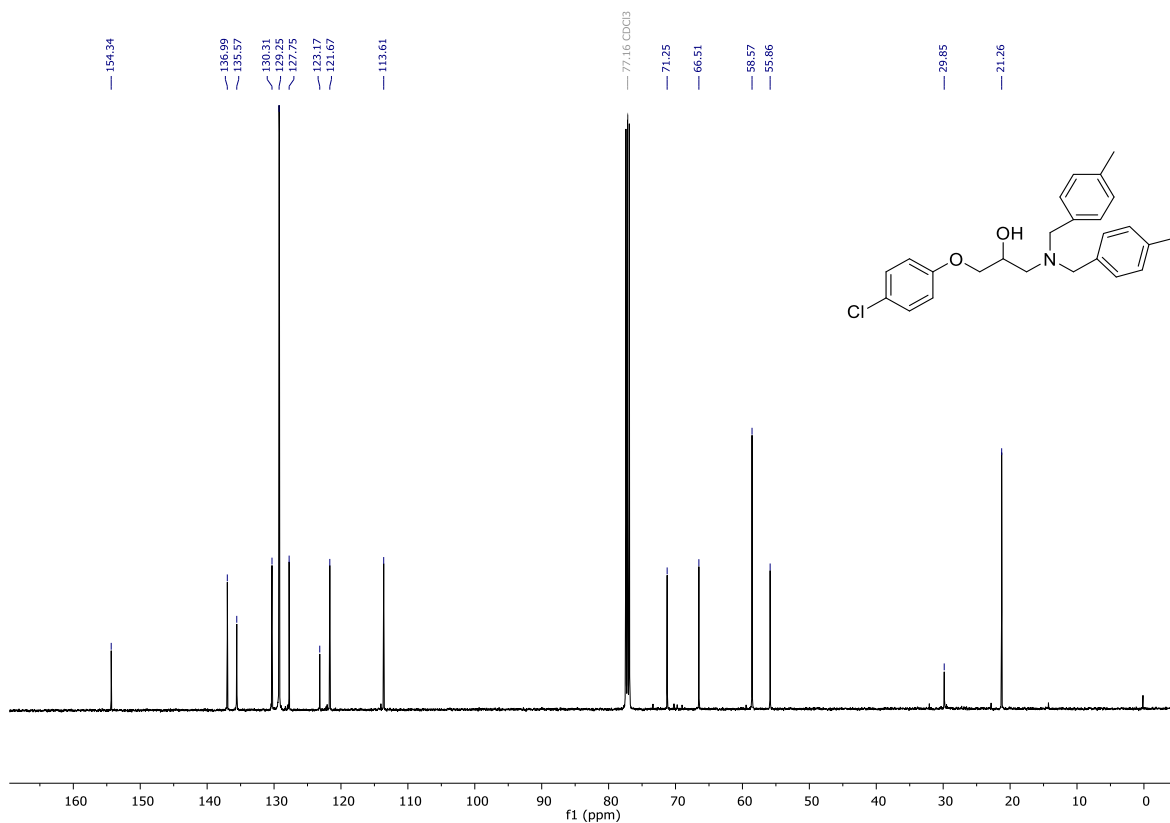

**1-[Bis(4-methylbenzyl)amino]-3-(4-chlorophenoxy)propan-2-ol (28)**

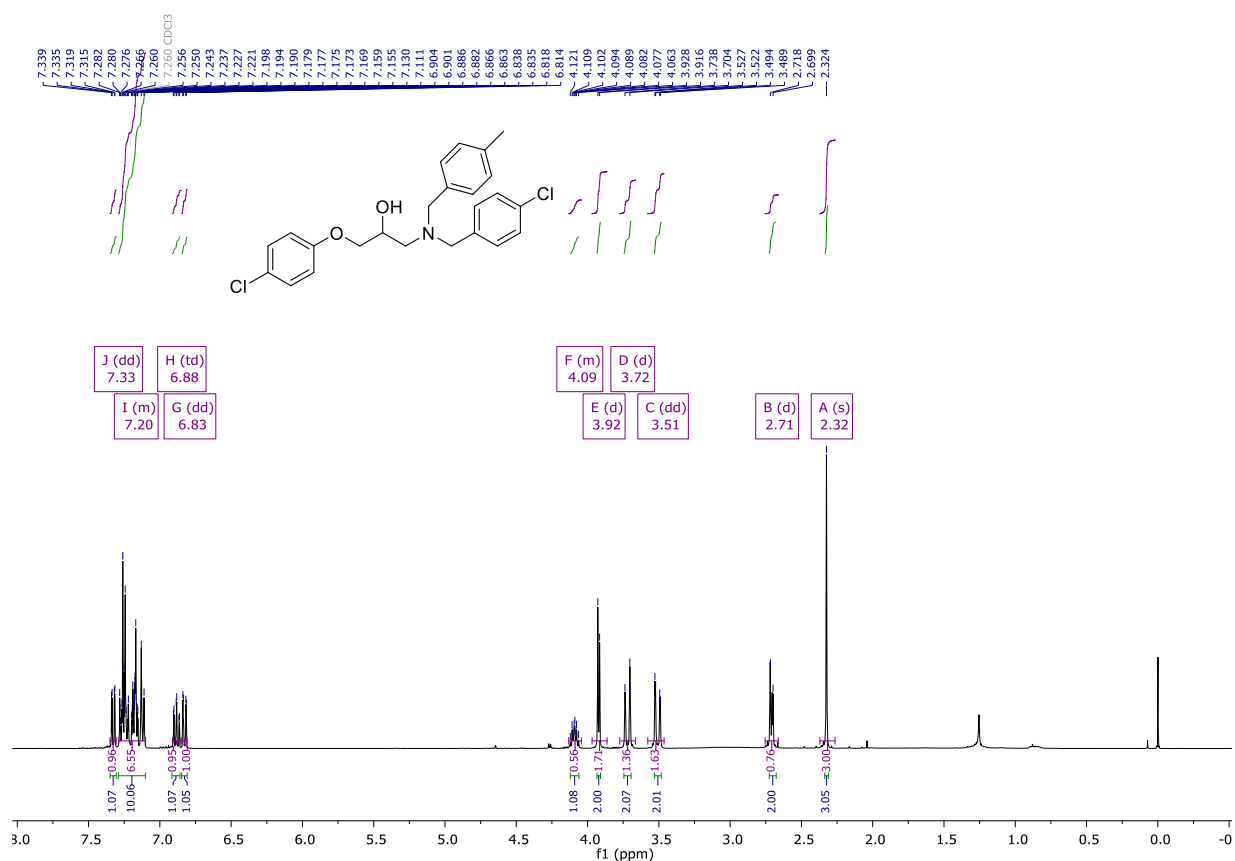

**1-[(4-Chlorobenzyl)(4-methylbenzyl)amino]-3-(4-chlorophenoxy)propan-2-ol (29)**

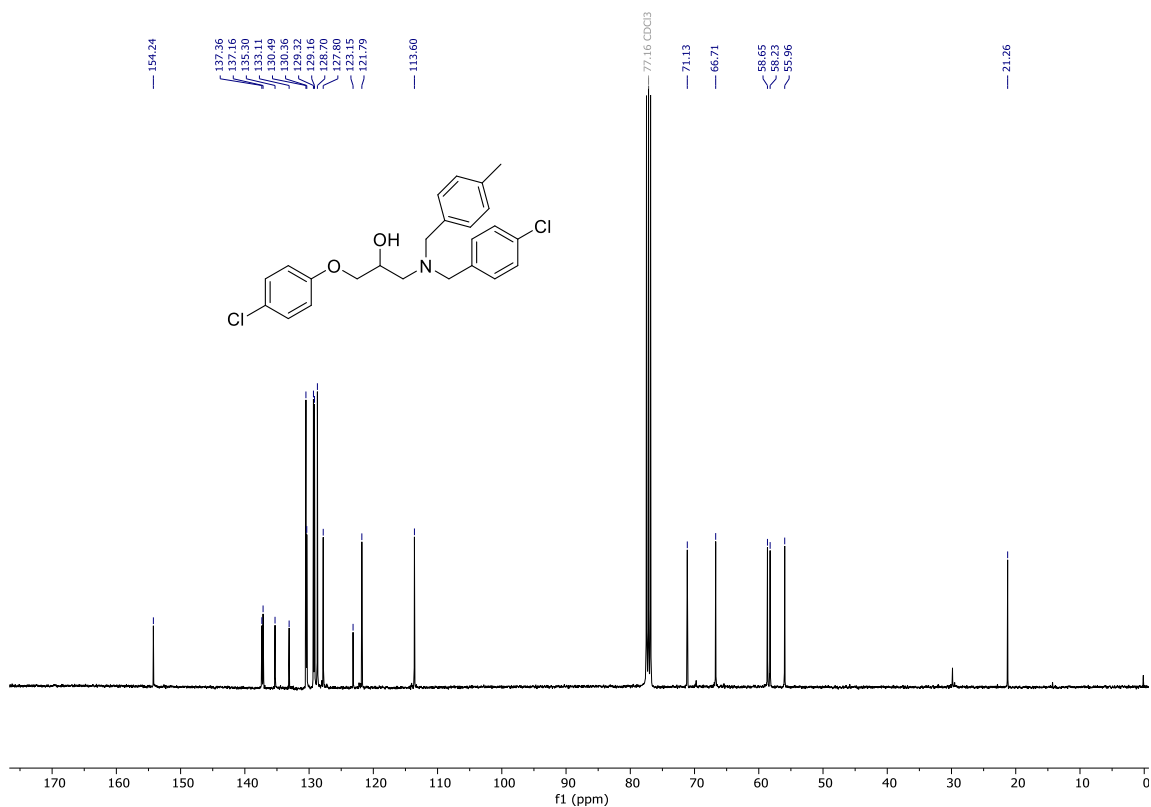

**1-[(4-Chlorobenzyl)(4-methylbenzyl)amino]-3-(4-chlorophenoxy)propan-2-ol (29)**

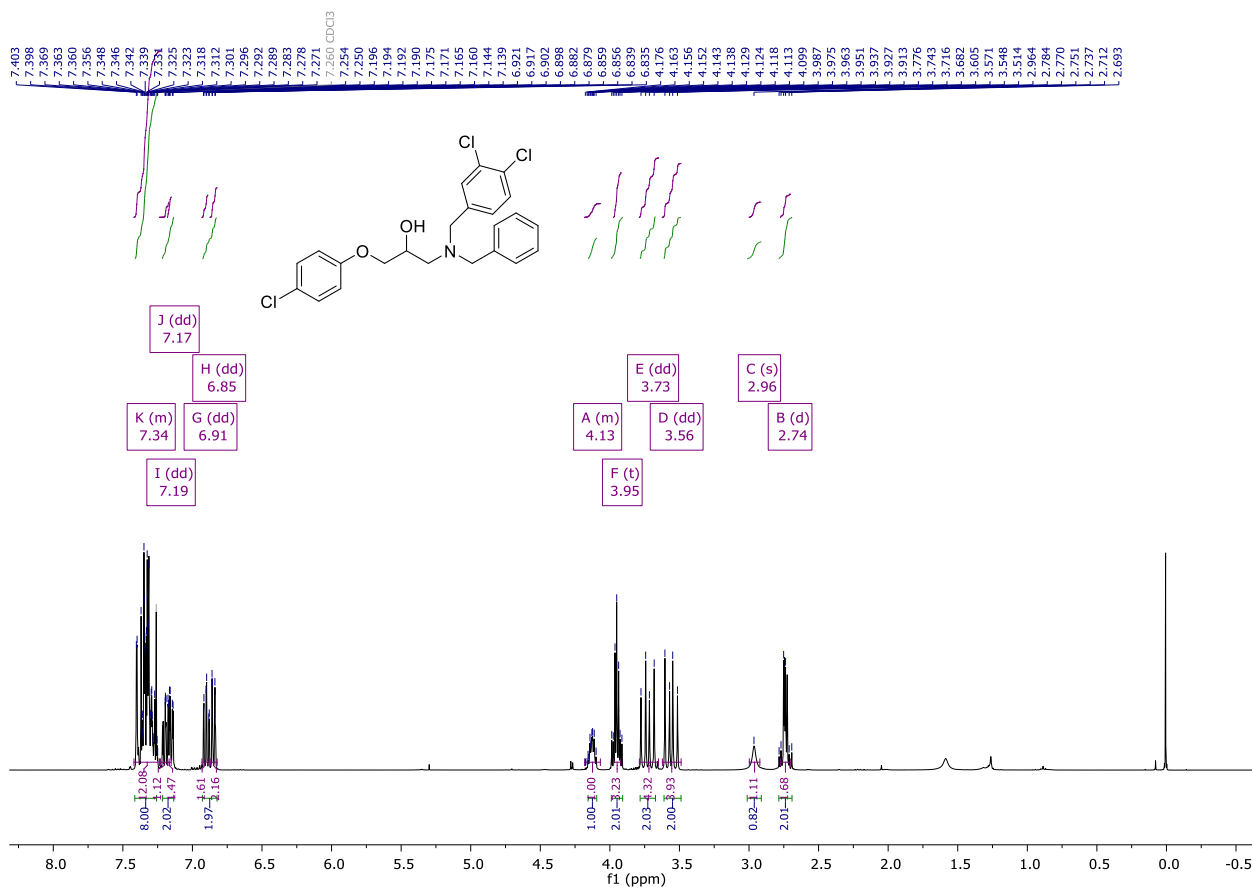

**1-[Benzyl(3,4-dichlorobenzyl)amino]-3-(4-chlorophenoxy)propan-2-ol (30)**

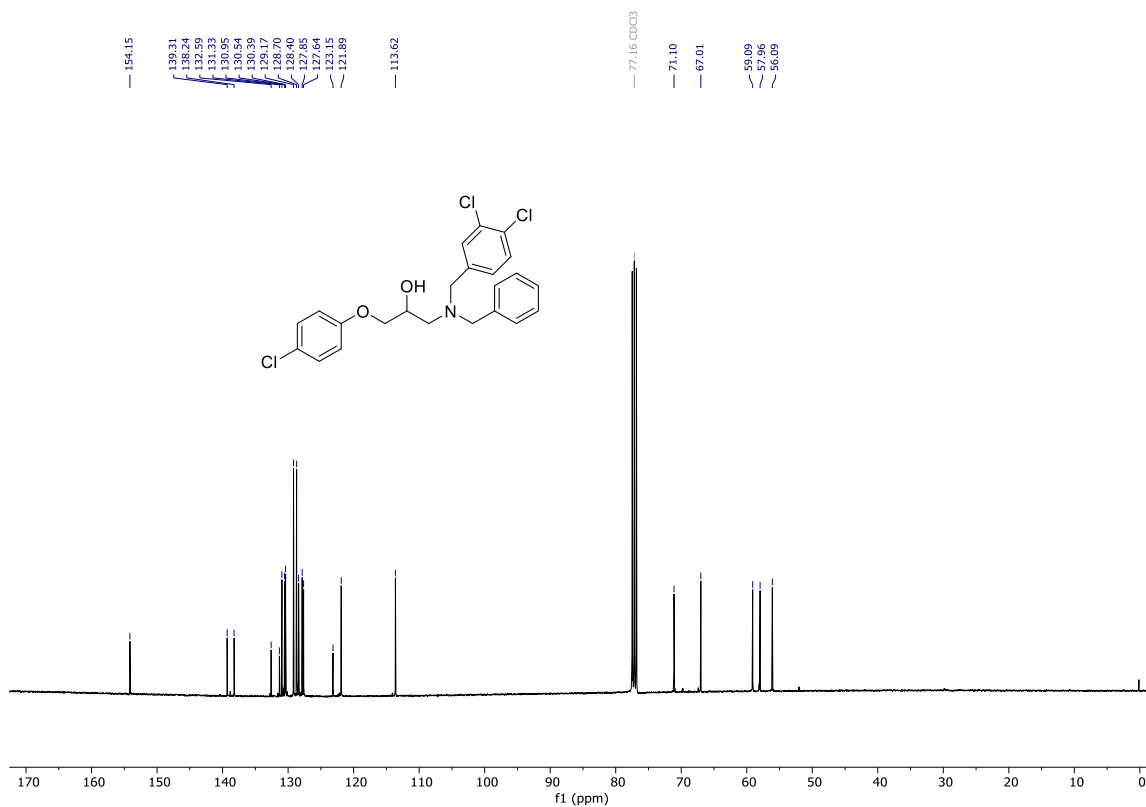

**1-[Benzyl(3,4-dichlorobenzyl)amino]-3-(4-chlorophenoxy)propan-2-ol (30)**

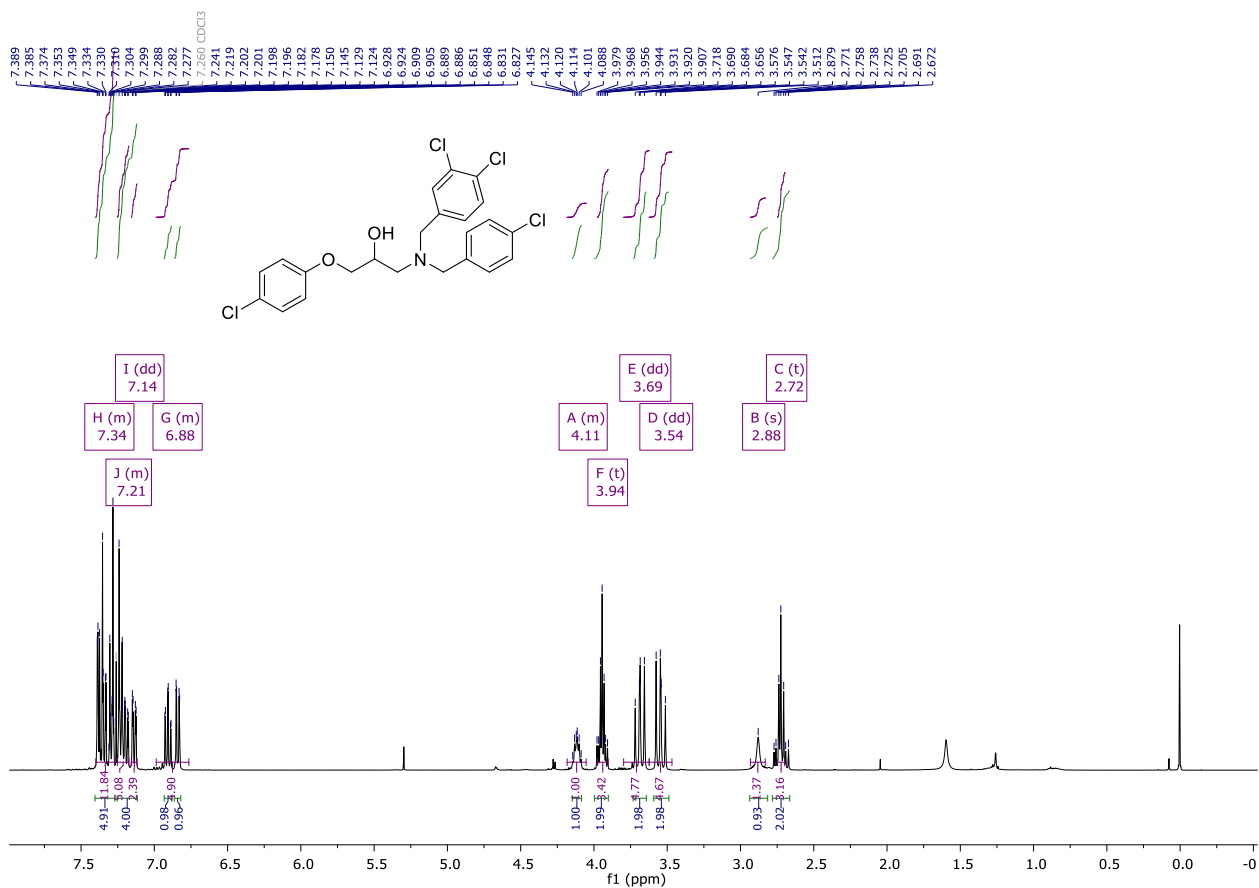

**1-[(4-Chlorobenzyl)(3,4-dichlorobenzyl)amino]-3-(4-chlorophenoxy)propan-2-ol (31)**

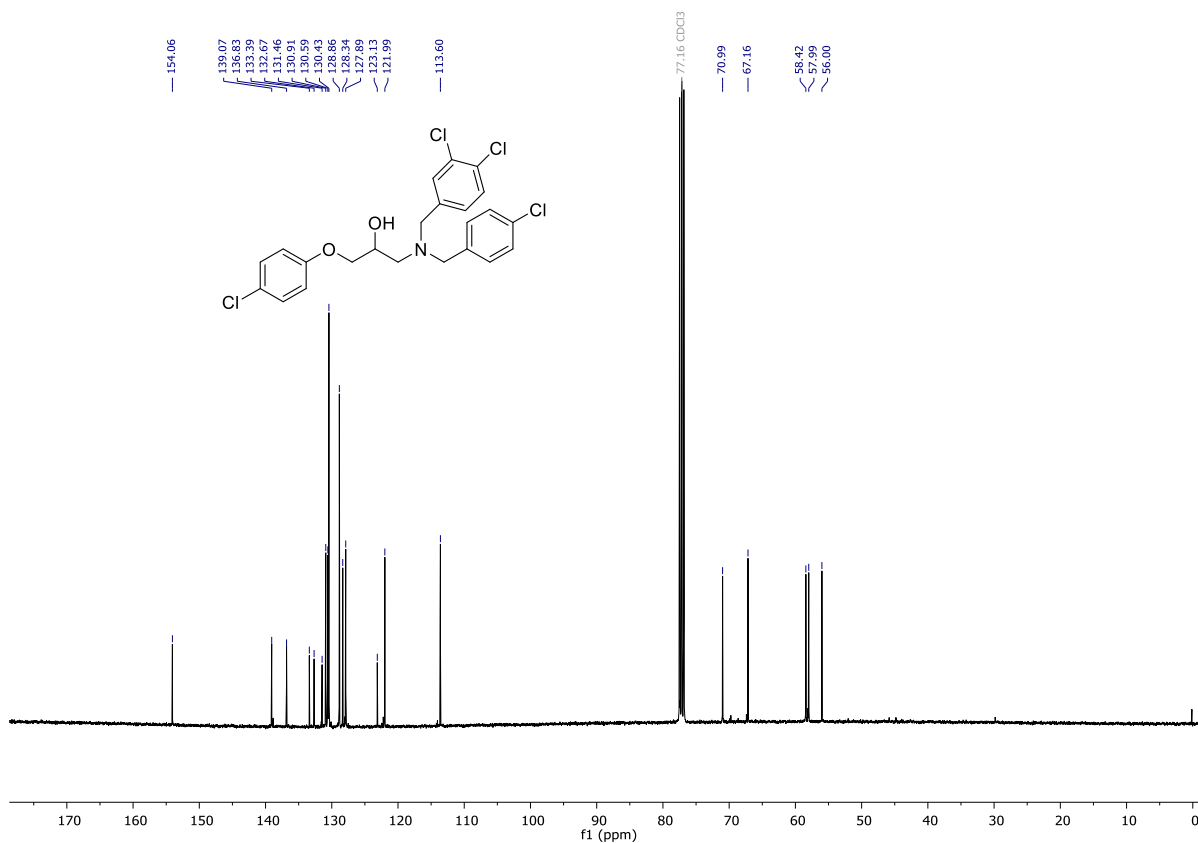

**1-[(4-Chlorobenzyl)(3,4-dichlorobenzyl)amino]-3-(4-chlorophenoxy)propan-2-ol (31)**

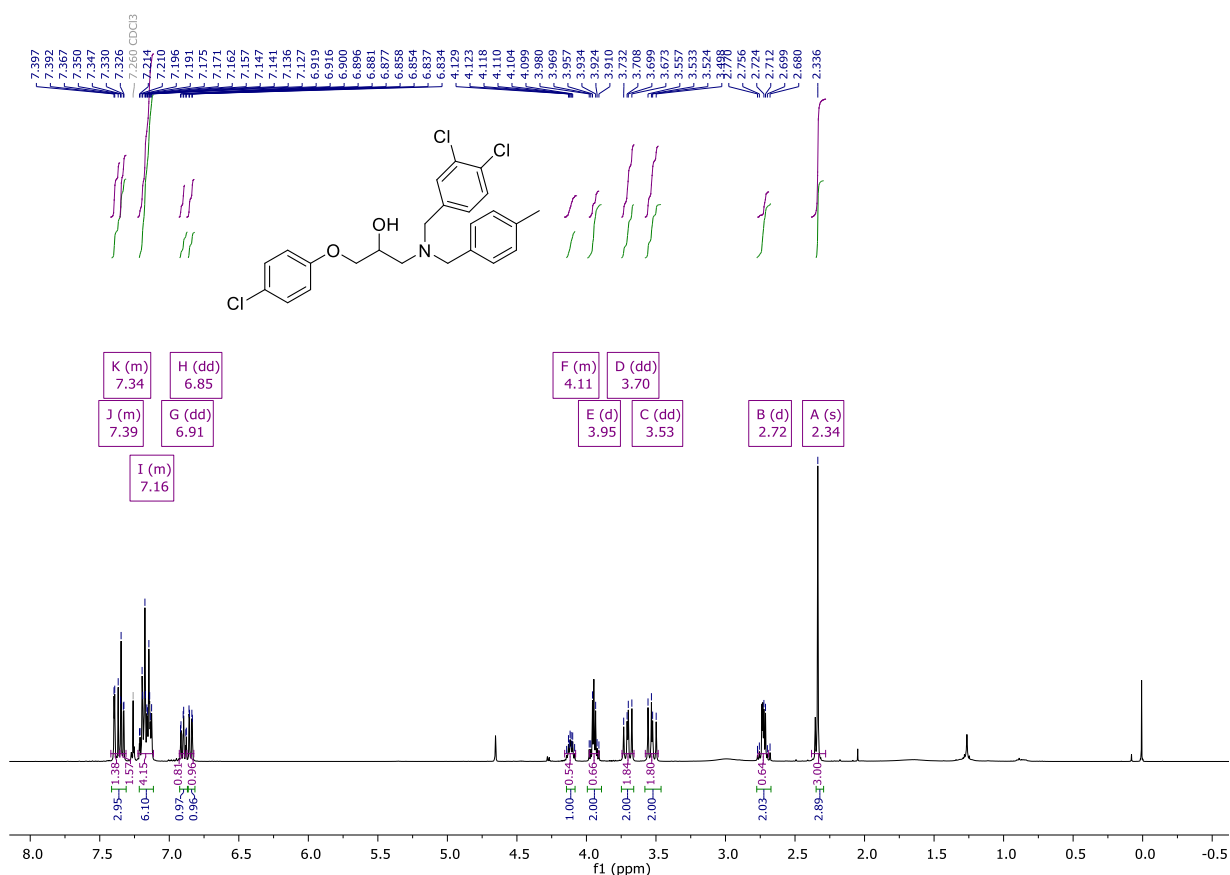

**1-(4-Chlorophenoxy)-3-[(3,4-dichlorobenzyl)(4-methylbenzyl)amino]propan-2-ol (32)**

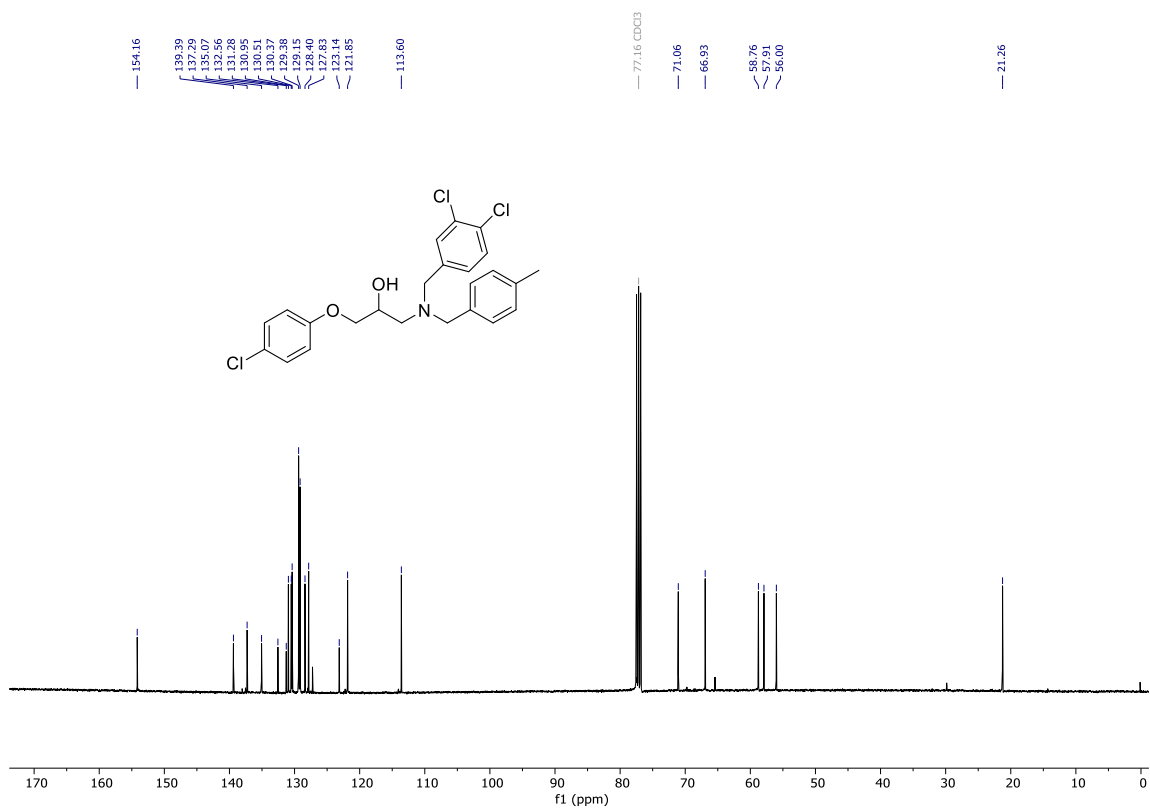

**1-(4-Chlorophenoxy)-3-[(3,4-dichlorobenzyl)(4-methylbenzyl)amino]propan-2-ol (32)**

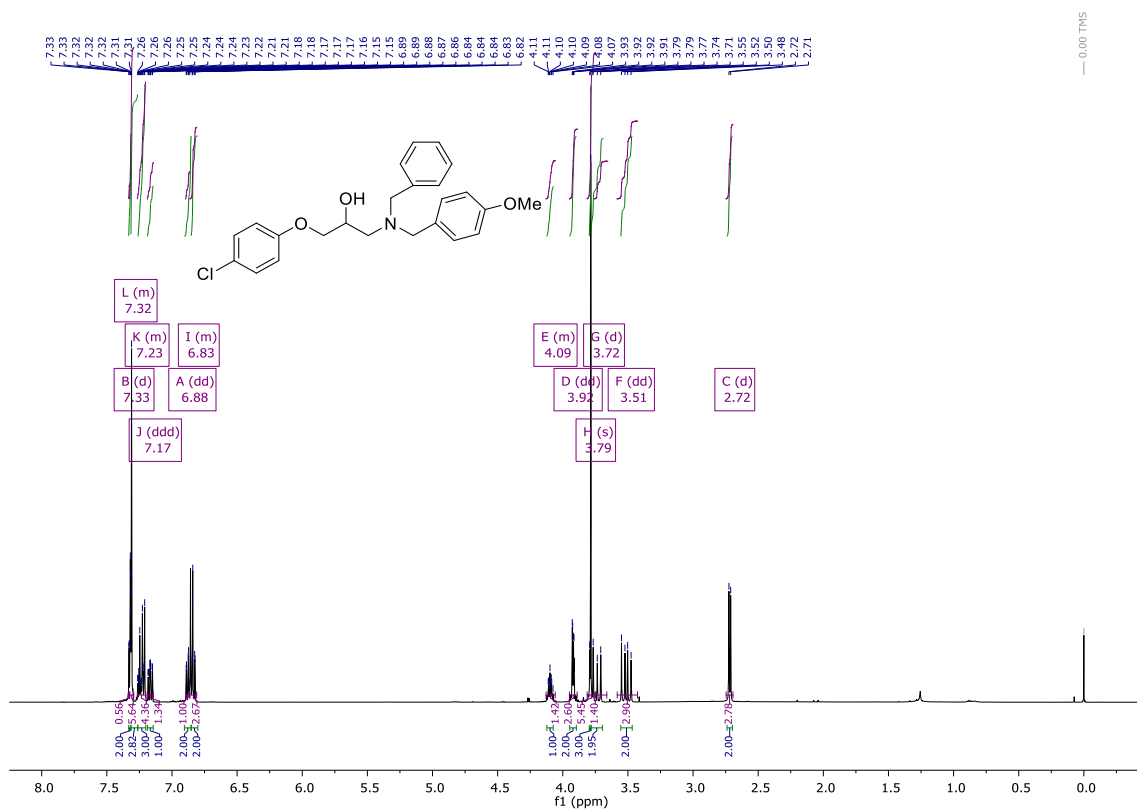

**1-[Benzyl(4-methoxybenzyl)amino]-3-(4-chlorophenoxy)propan-2-ol (33)**

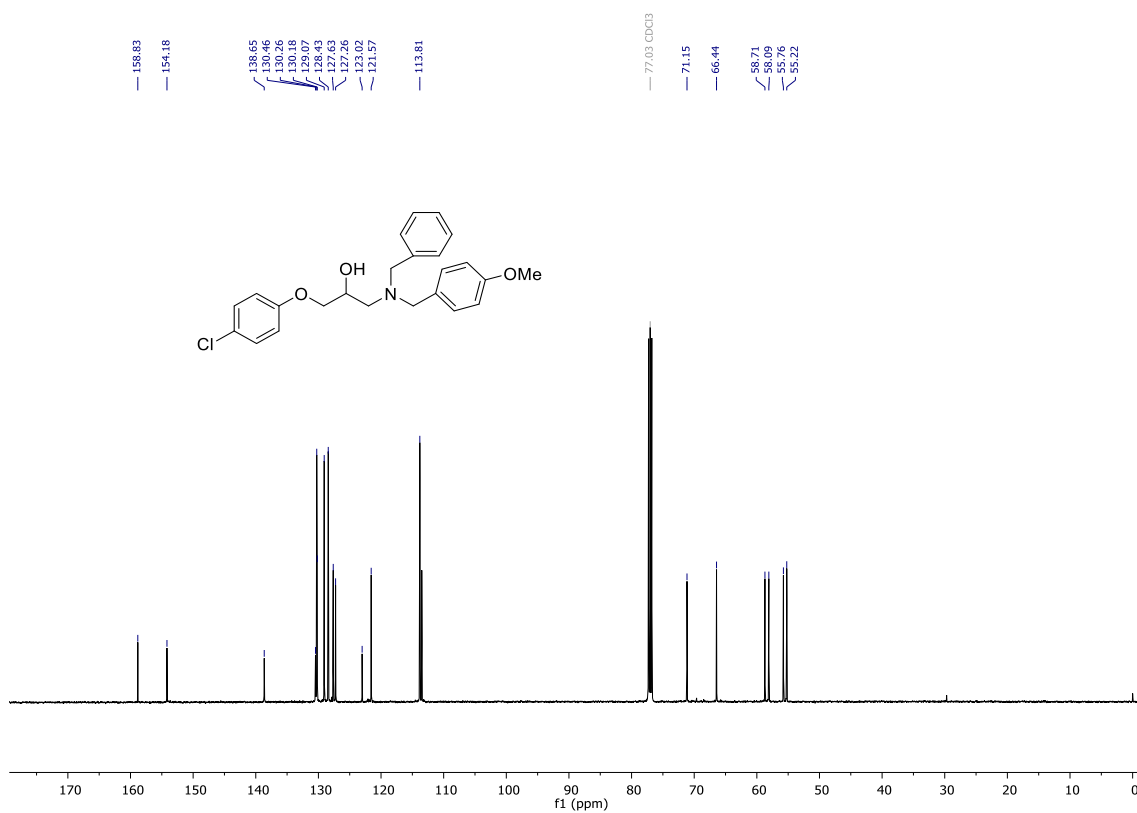

**1-[Benzyl(4-methoxybenzyl)amino]-3-(4-chlorophenoxy)propan-2-ol (33)**



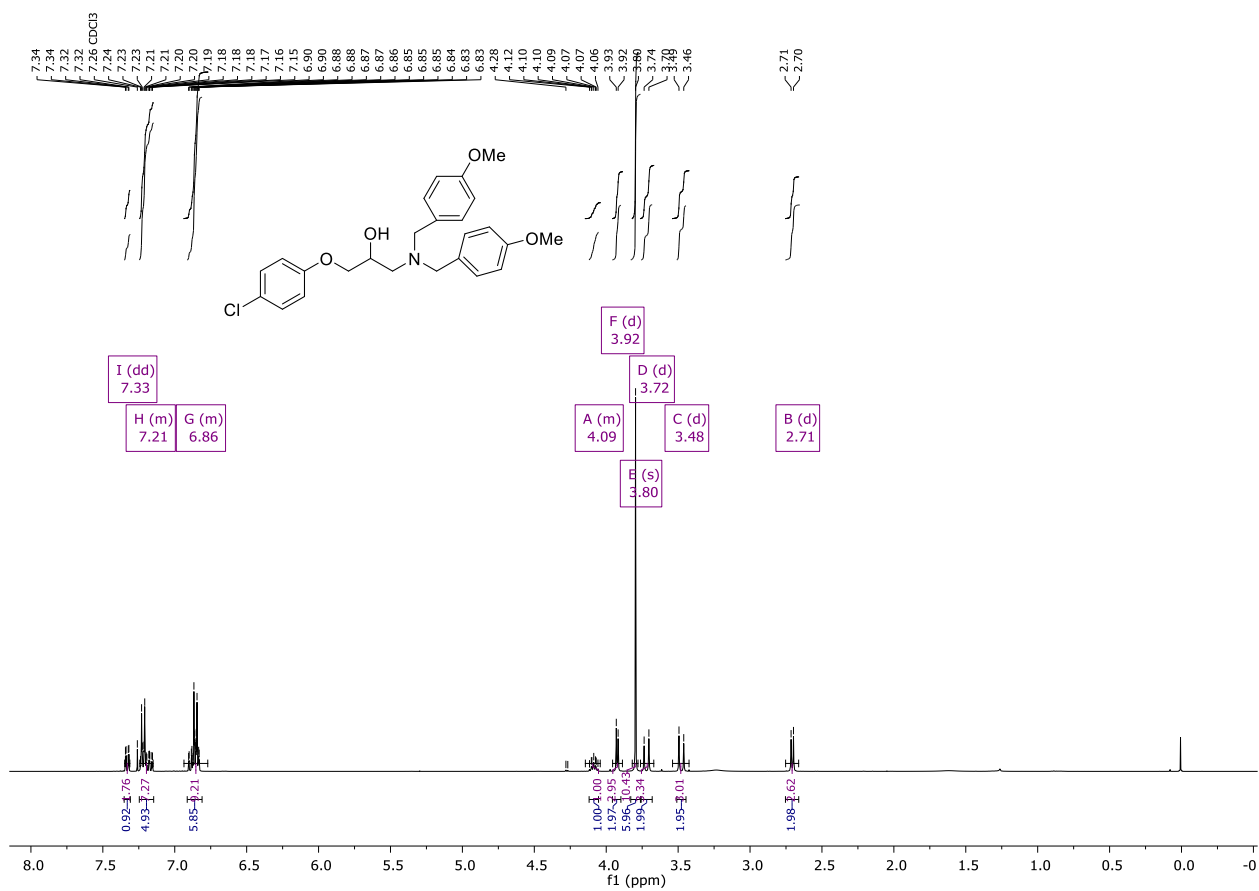

**1-[Bis(4-methoxybenzyl)amino]-3-(4-chlorophenoxy)propan-2-ol (34)**

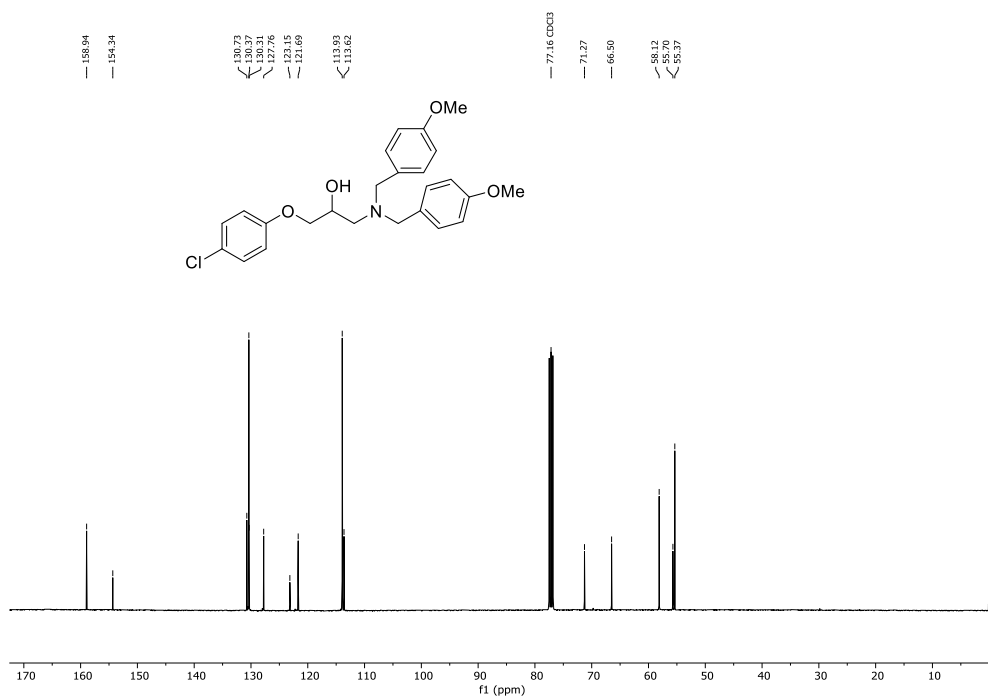

**1-[Bis(4-methoxybenzyl)amino]-3-(4-chlorophenoxy)propan-2-ol (34)**

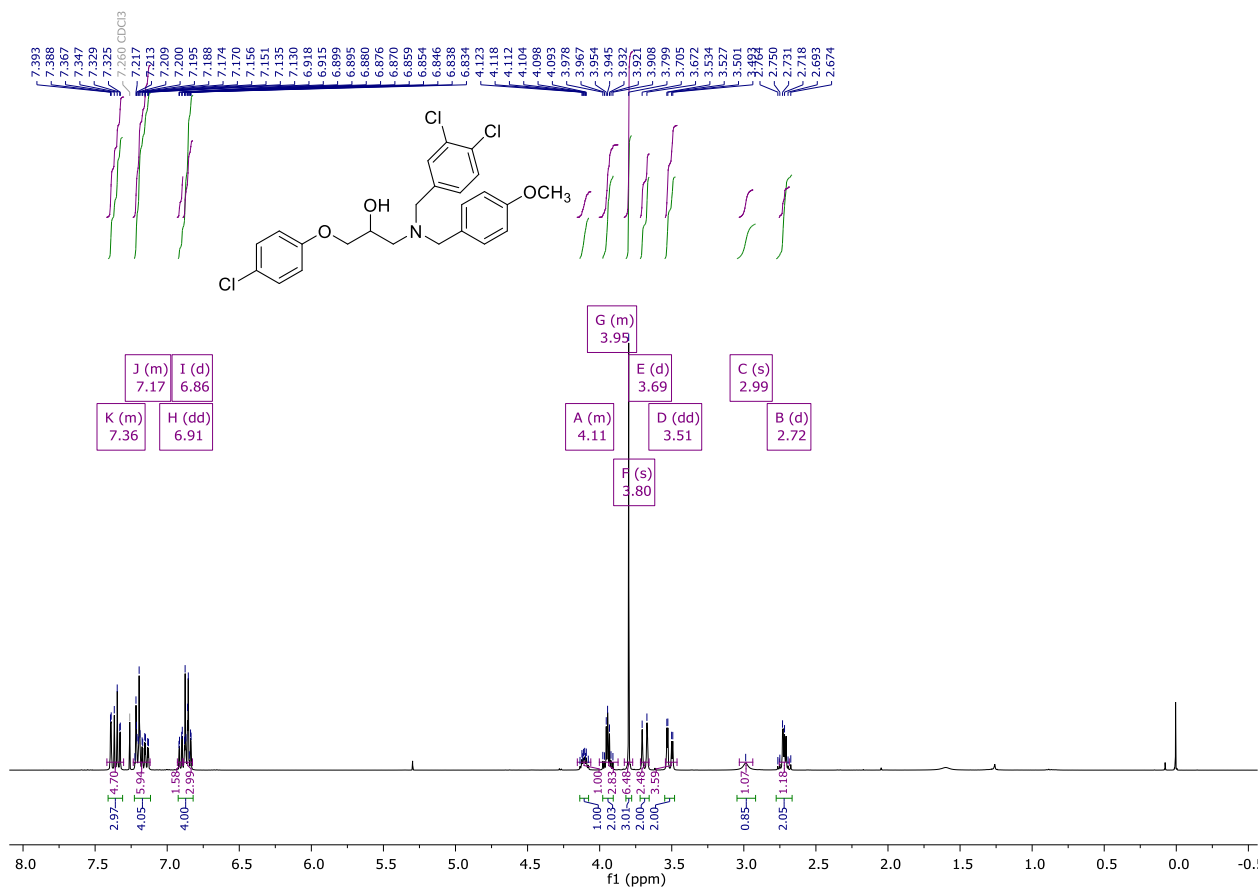

**1-(4-Chlorophenoxy)-3-[(3,4-dichlorobenzyl)(4-methoxybenzyl)amino]propan-2-ol (35)**

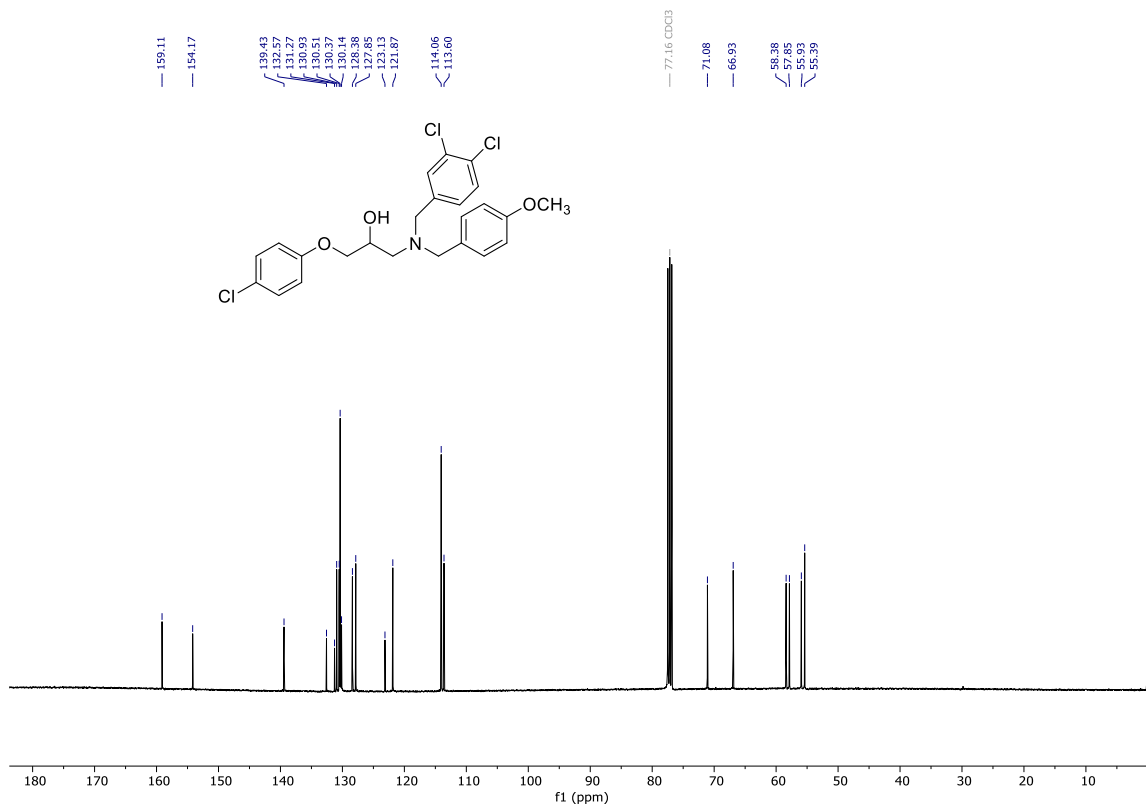

**1-(4-Chlorophenoxy)-3-[(3,4-dichlorobenzyl)(4-methoxybenzyl)amino]propan-2-ol (35)**

HPLC/MS analysis of BC1618, 1-35

1-(4-Chlorophenoxy)-3-(dibenzylamino)propan-2-ol

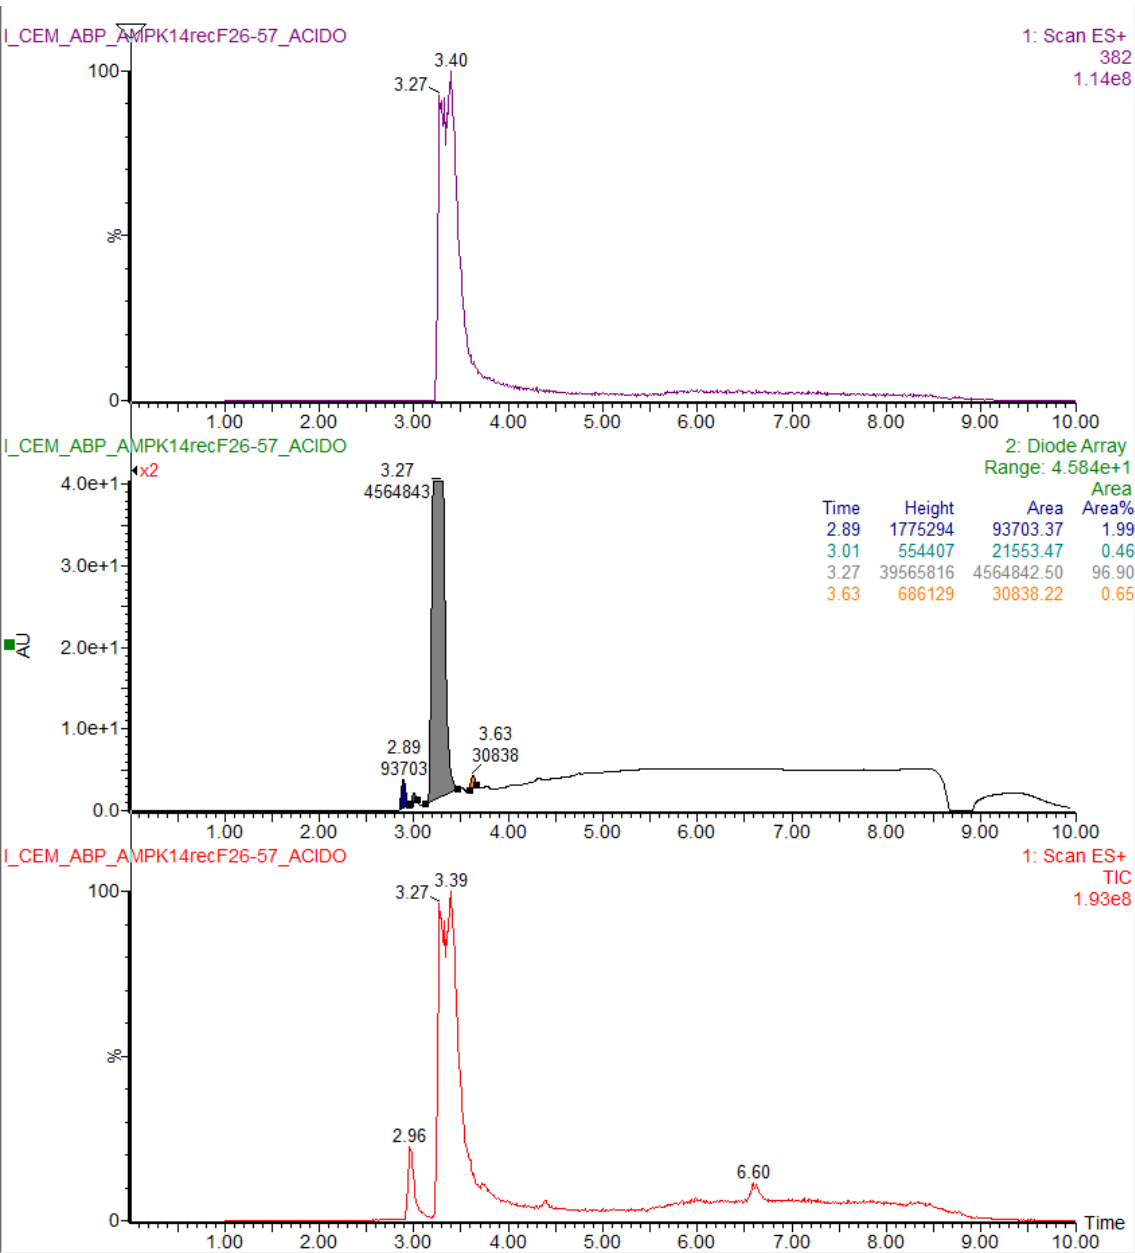

1-(Dibenzylamino)-3-(*p*-tolylloxy)propan-2-ol

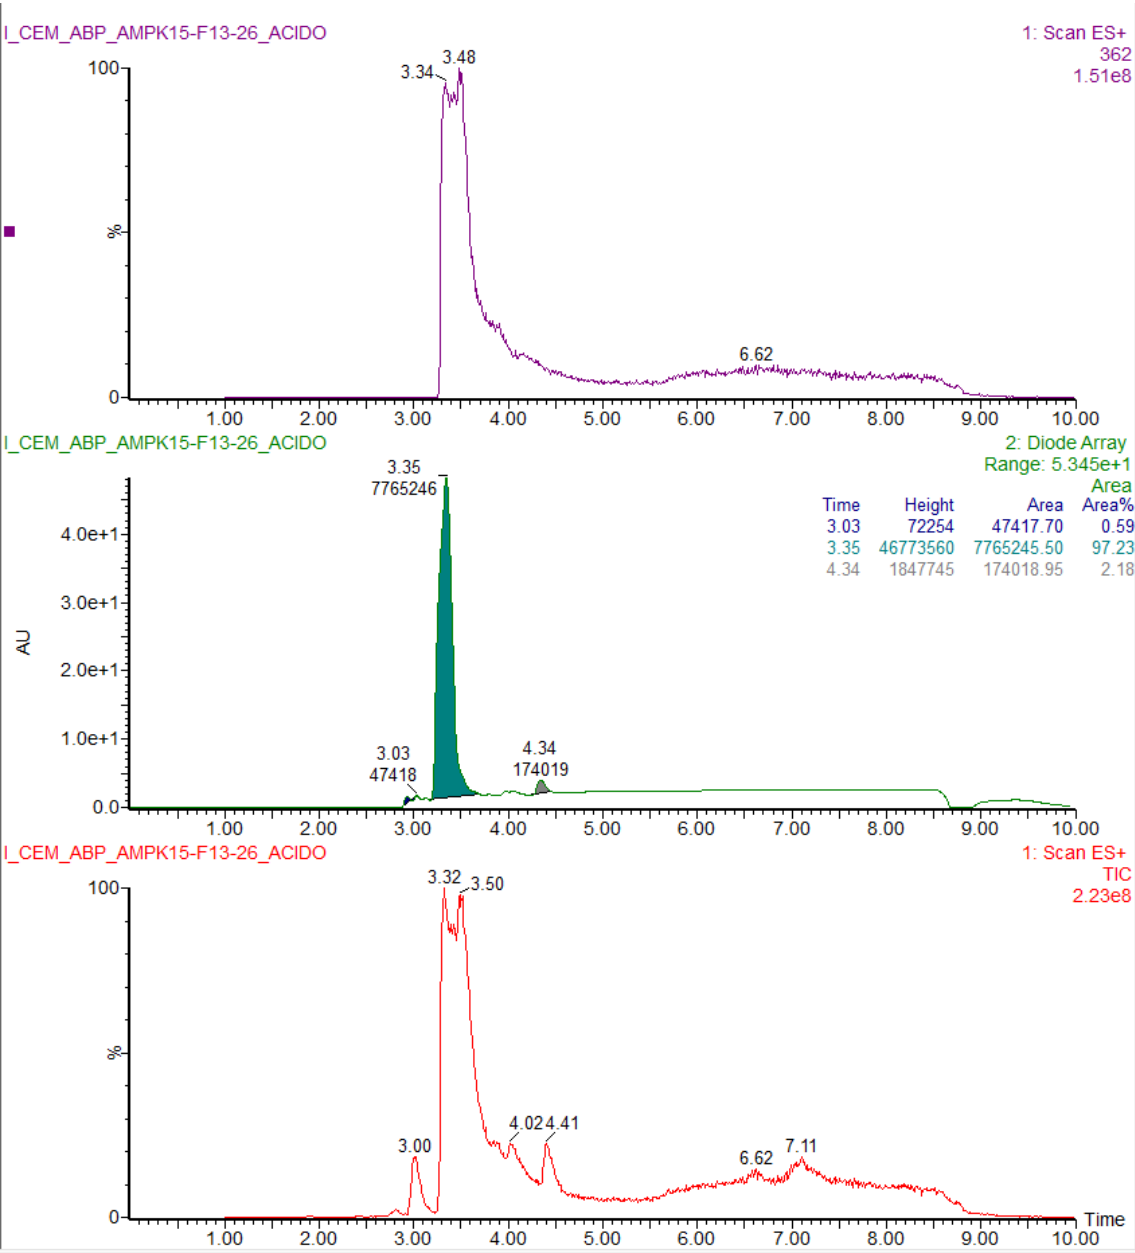

1-(4-Cyclohexylphenoxy)-3-(dibenzylamino)propan-2-ol

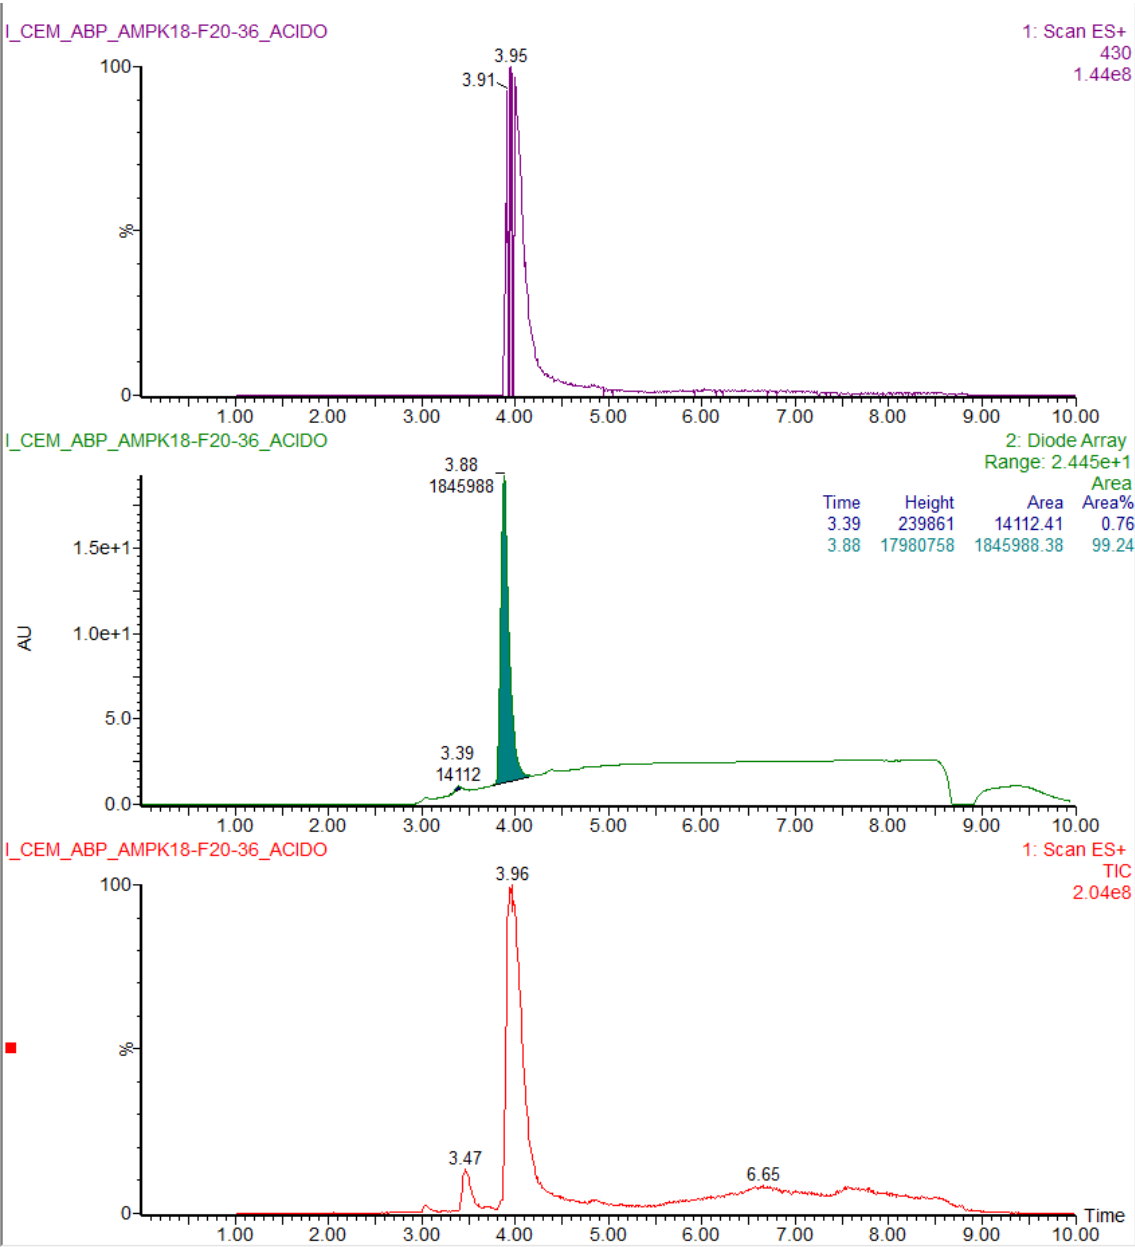

# 1-[4-(*Tert*-butyl)phenoxy]-3-(dibenzylamino)propan-2-ol

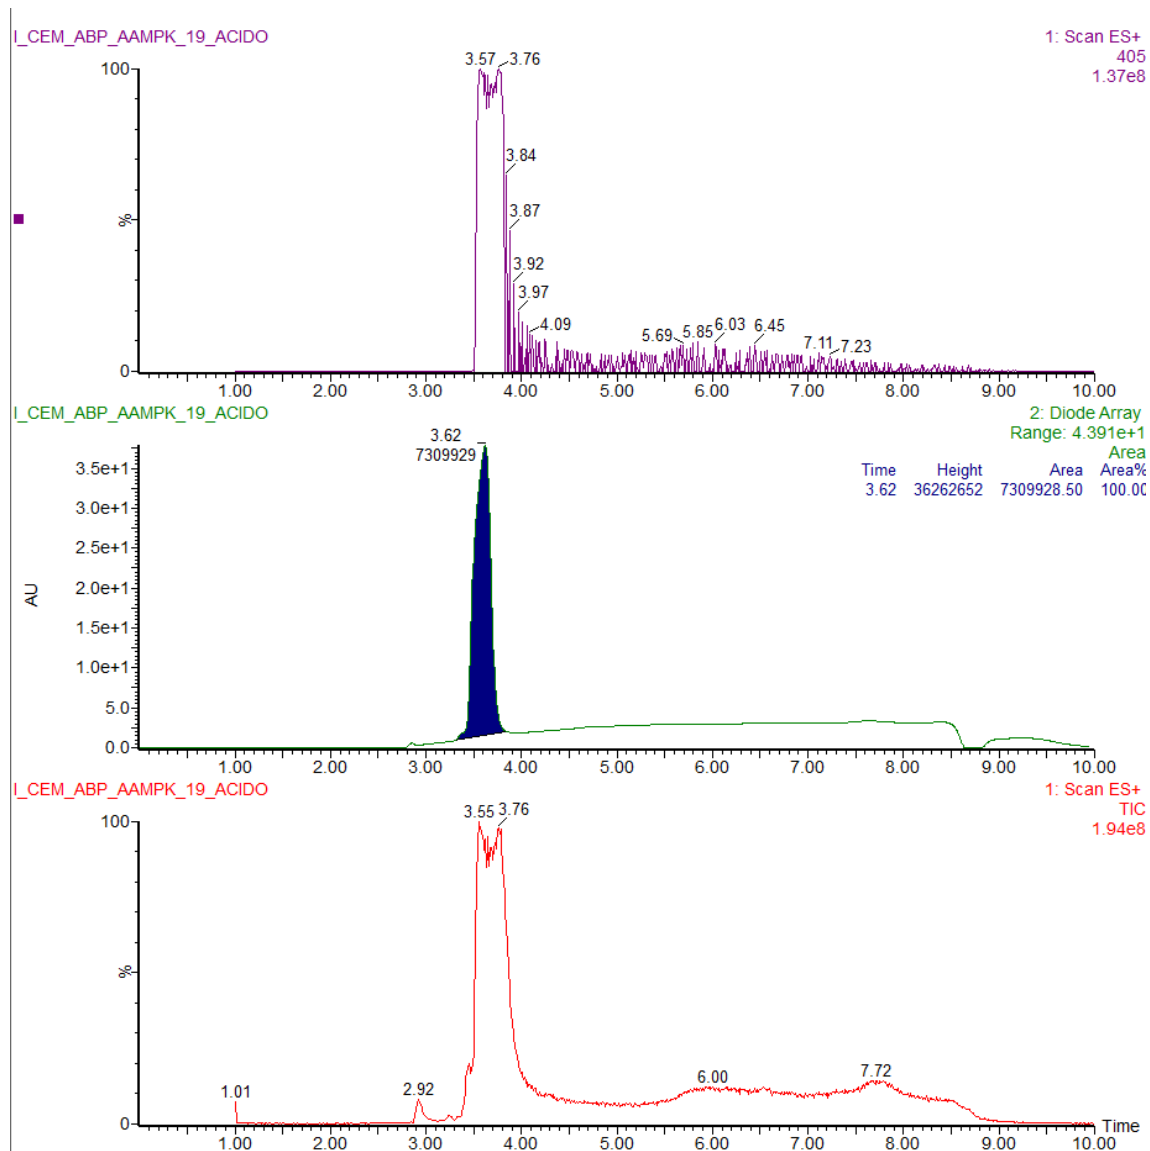

1-[4-(Benzyloxy)phenoxy]-3-(dibenzylamino)propan-2-ol

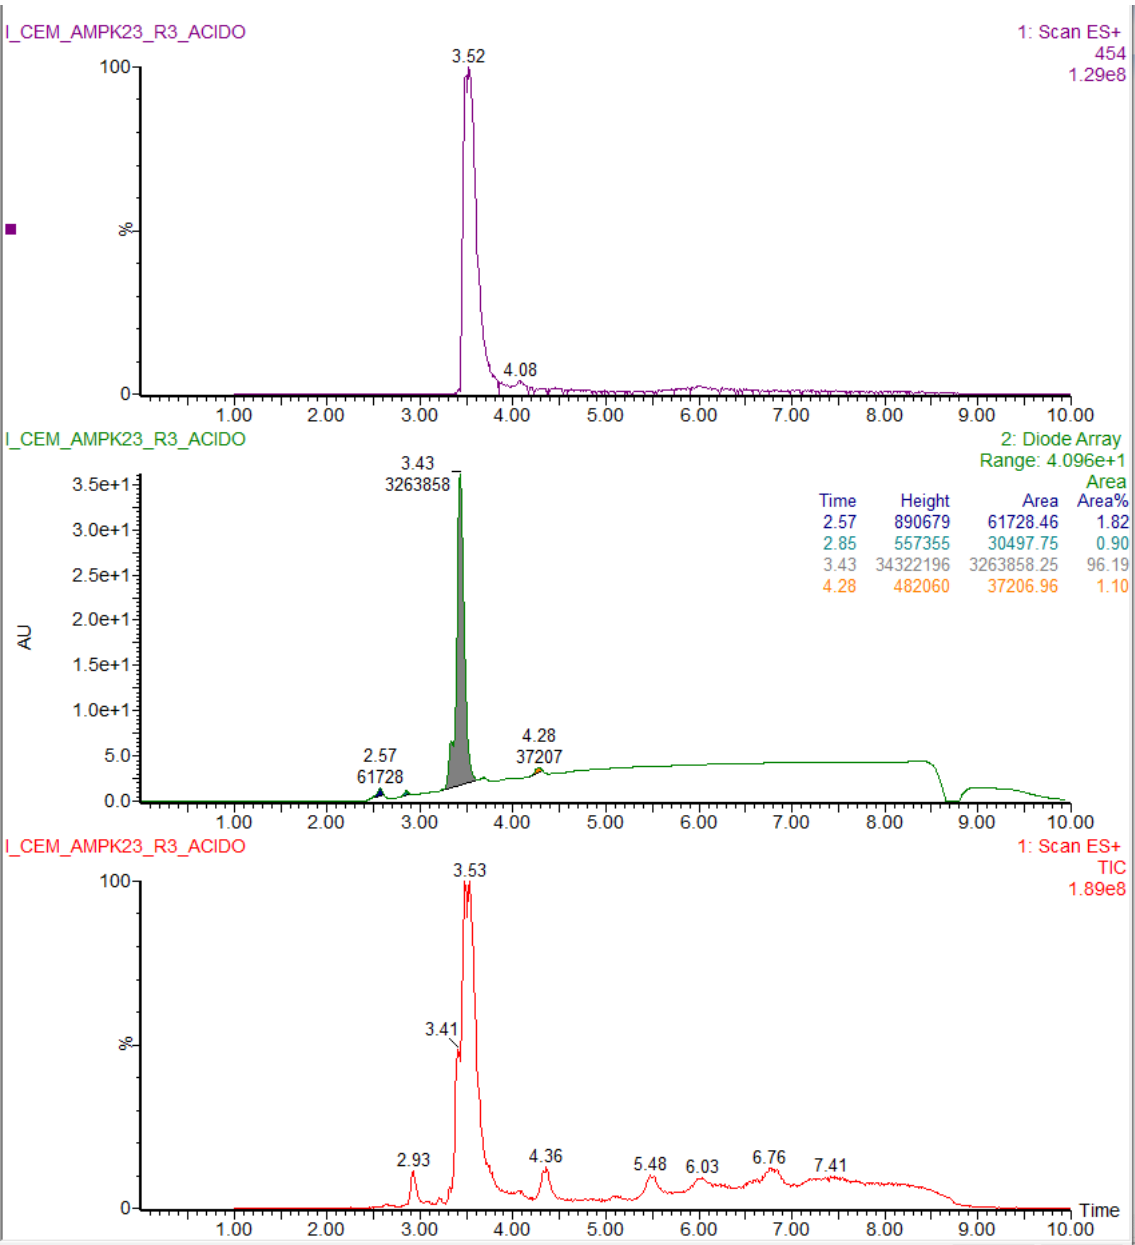

# 1-(Dibenzylamino)-3-(2,4-dichlorophenoxy)propan-2-ol

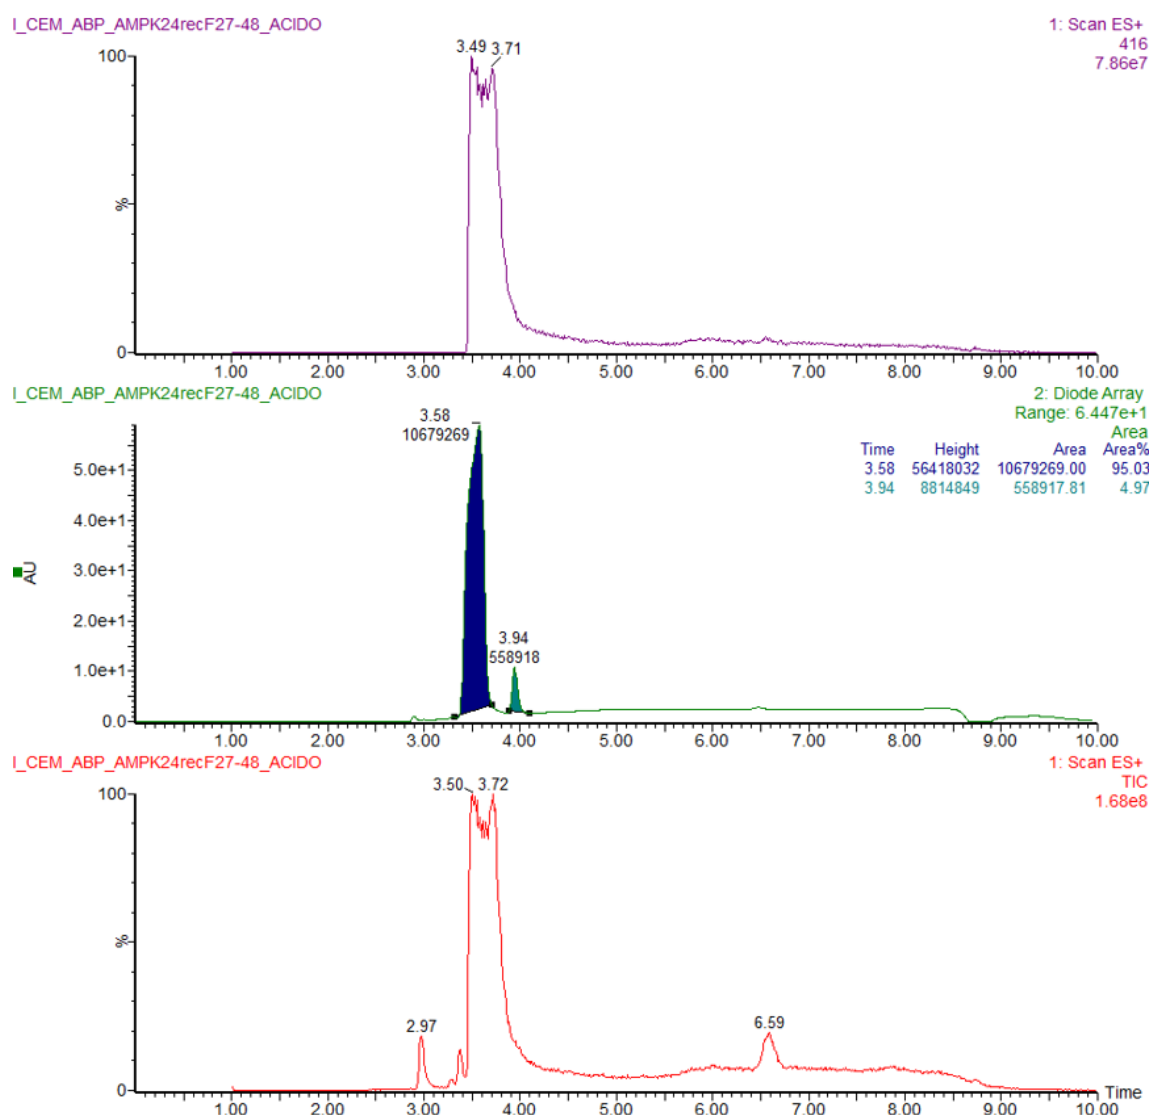



1-(4-Cyclopentylphenoxy)-3-(dibenzylamino)propan-2-ol

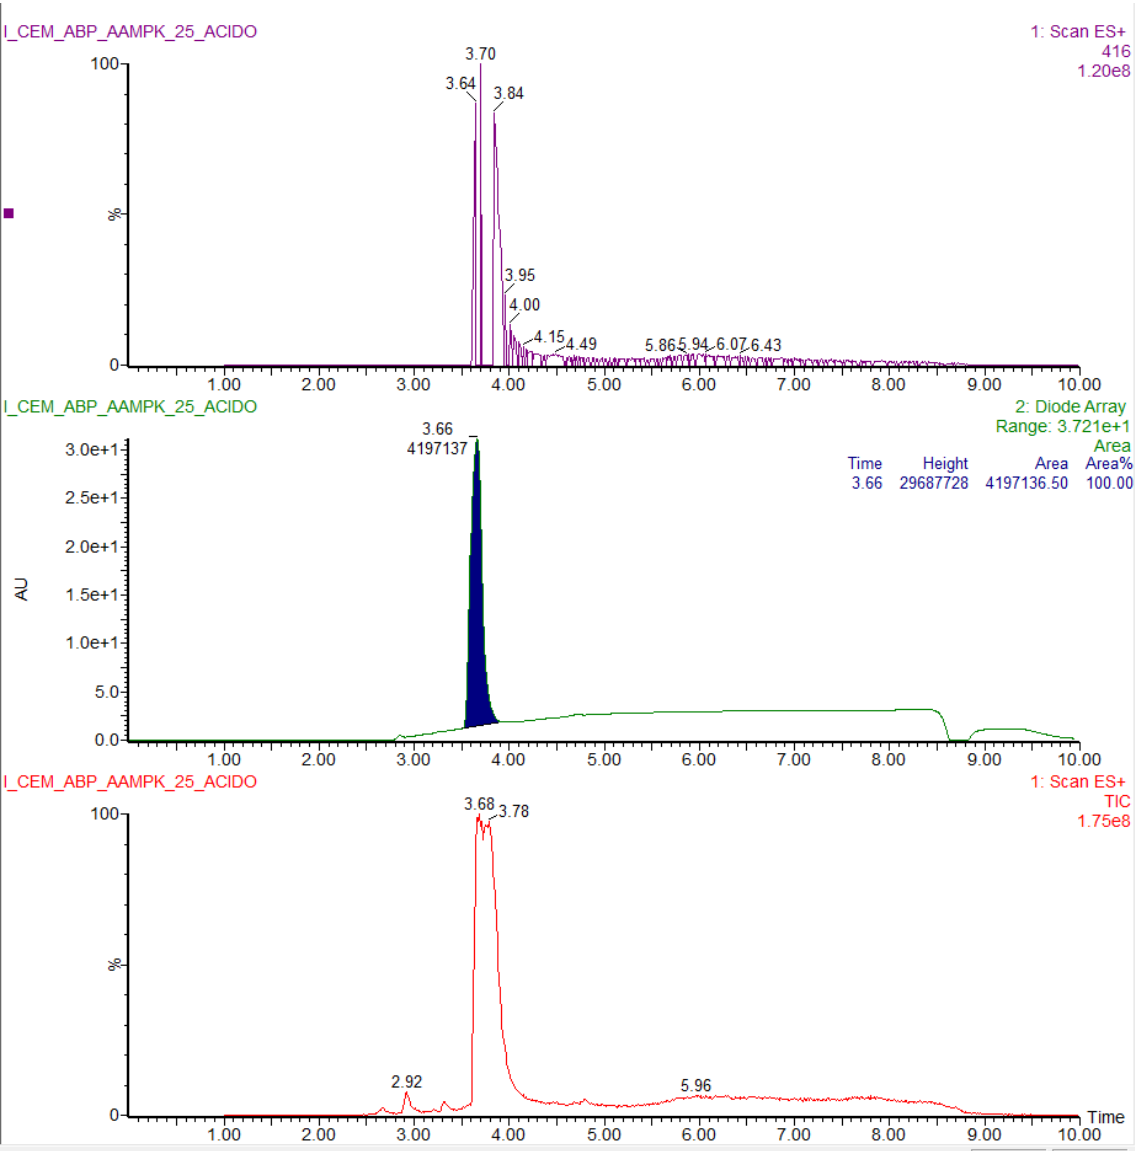

1-(Dibenzylamino)-3-(4-isopropylphenoxy)propan-2-ol

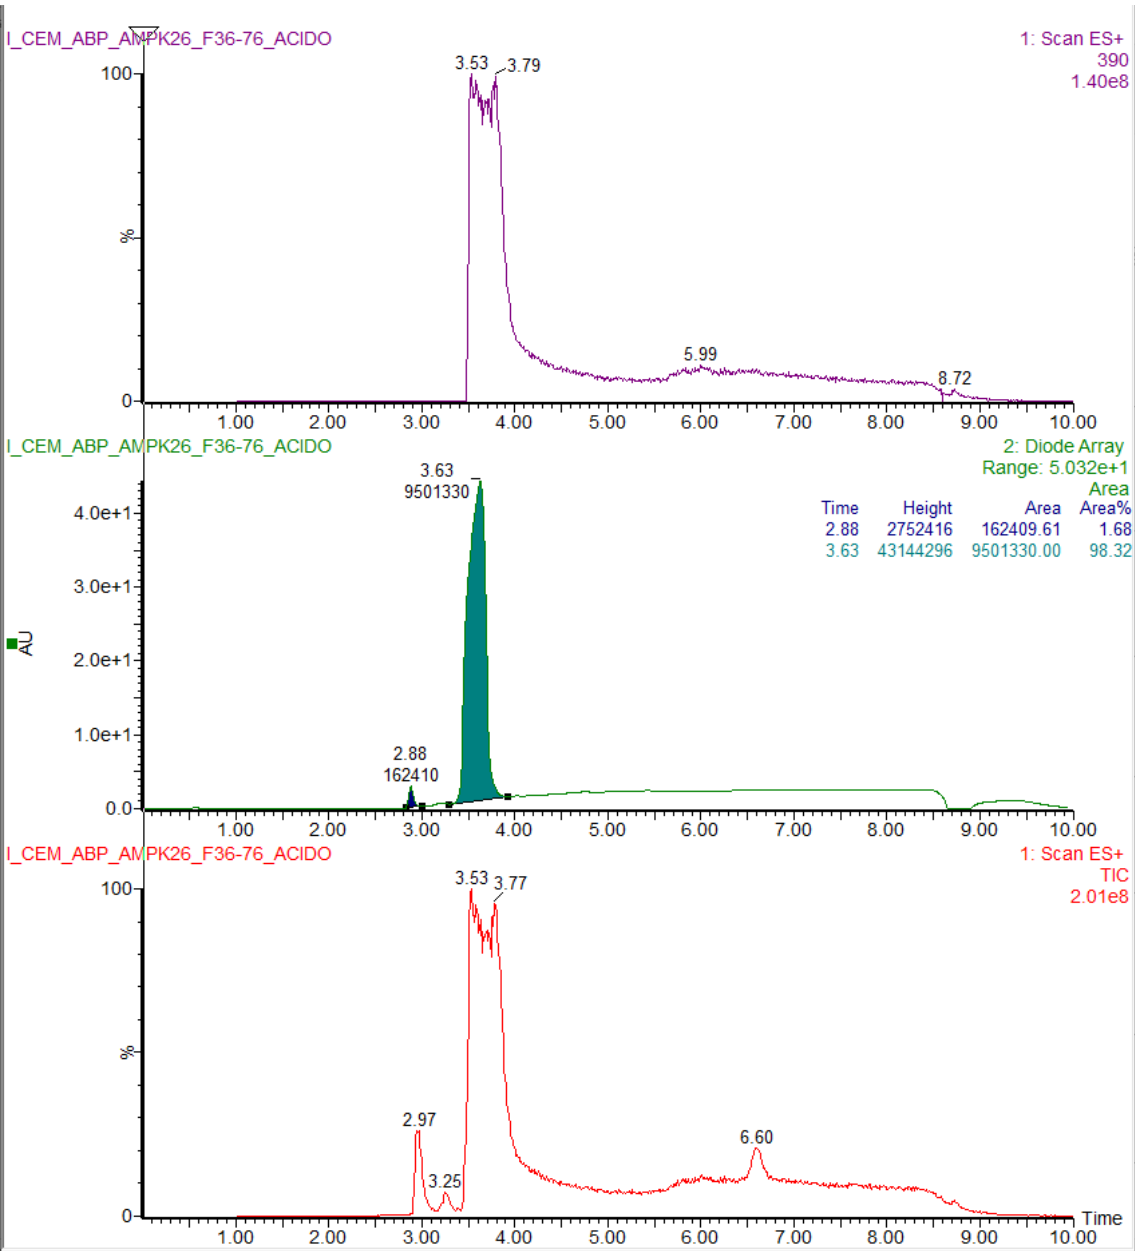

1-(Dibenzylamino)-3-phenoxypropan-2-ol

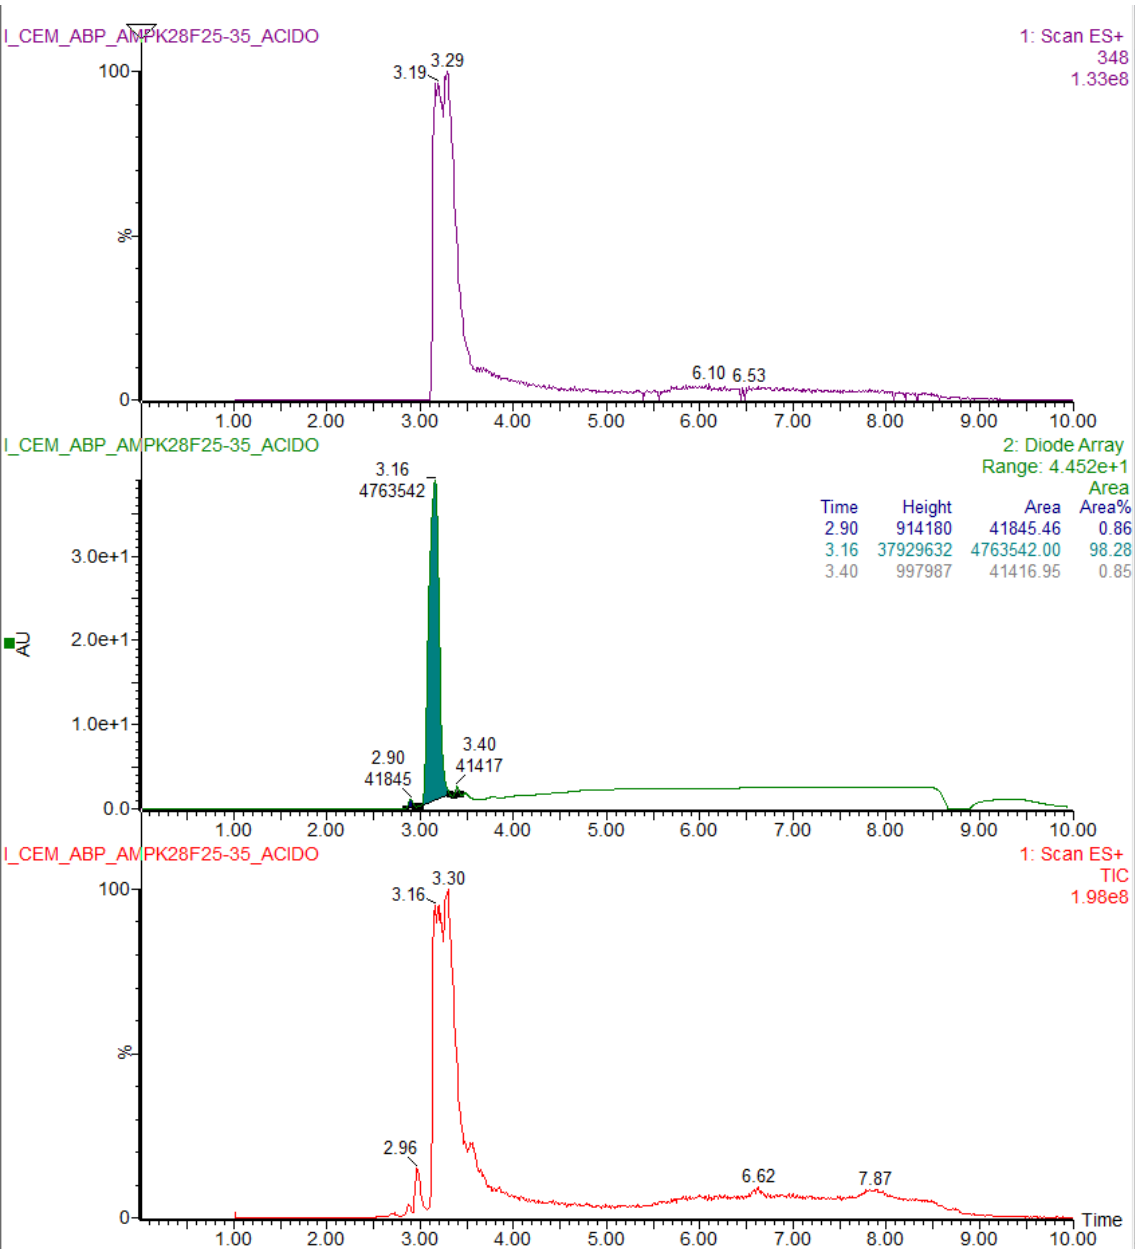

1-(Dibenzylamino)-3-(3,4-dimethylphenoxy)propan-2-ol

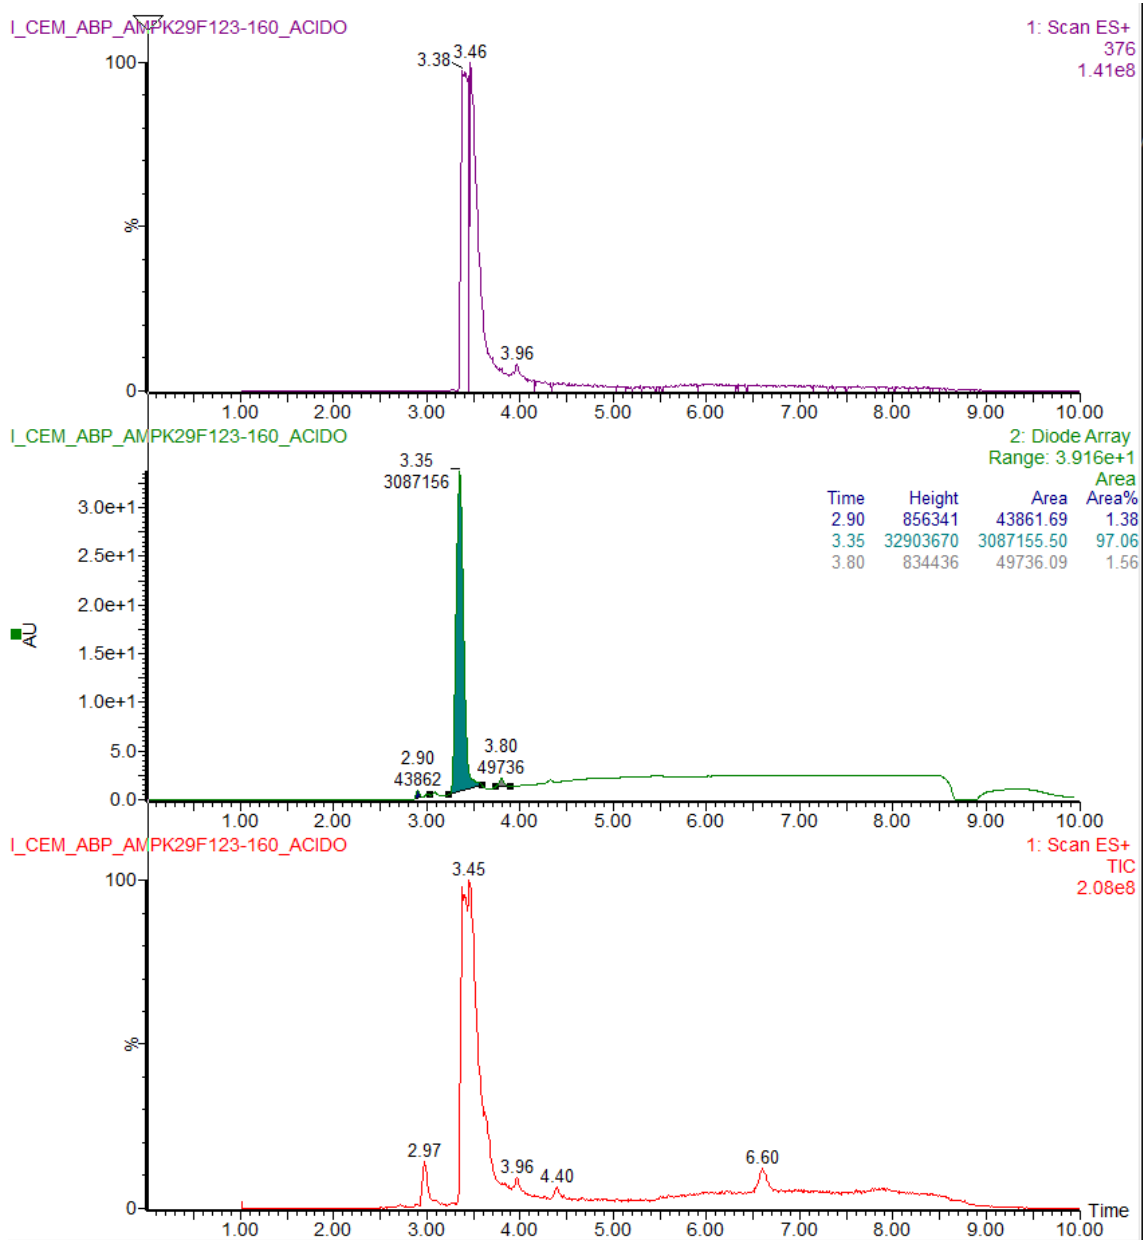

# 1-(Dibenzylamino)-3-(4-methoxyphenoxy)propan-2-ol

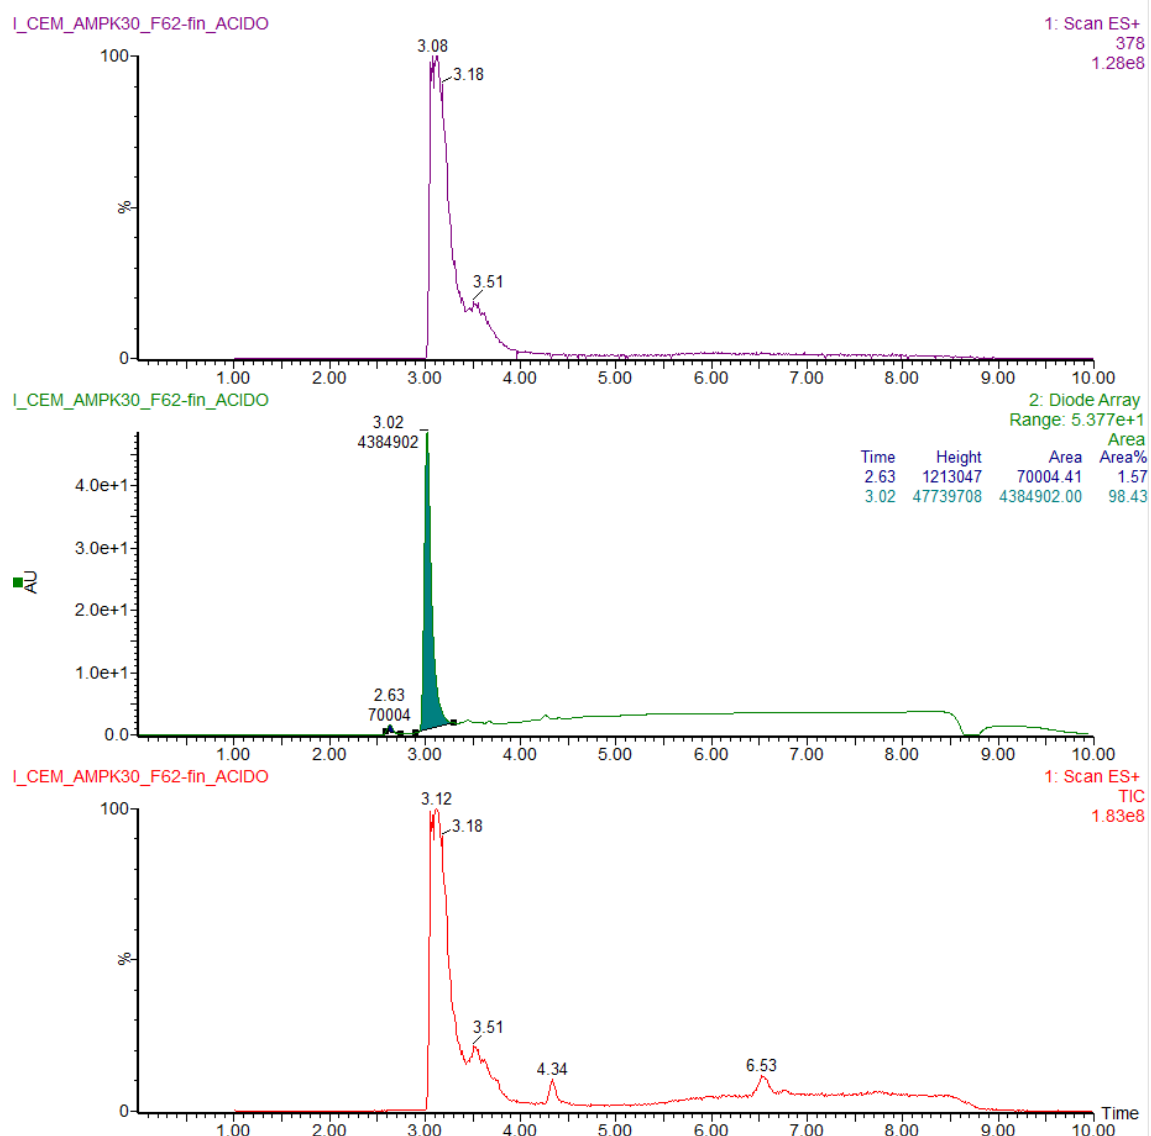

1-(Dibenzylamino)-3-(4-propoxyphenoxy)propan-2-ol

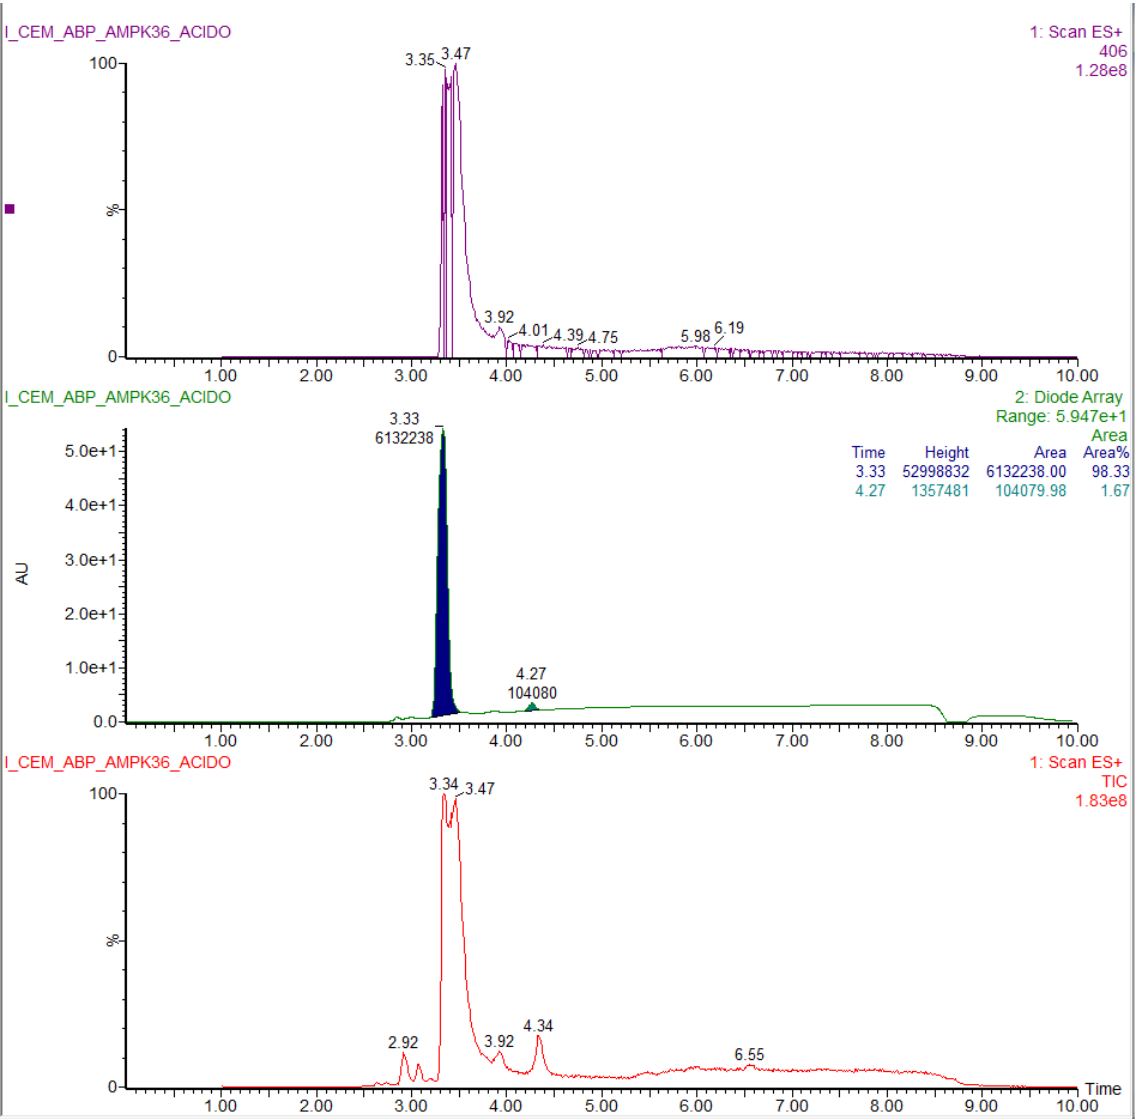

# 1-(Dibenzylamino)-3-(3,4-dichlorophenoxy)propan-2-ol

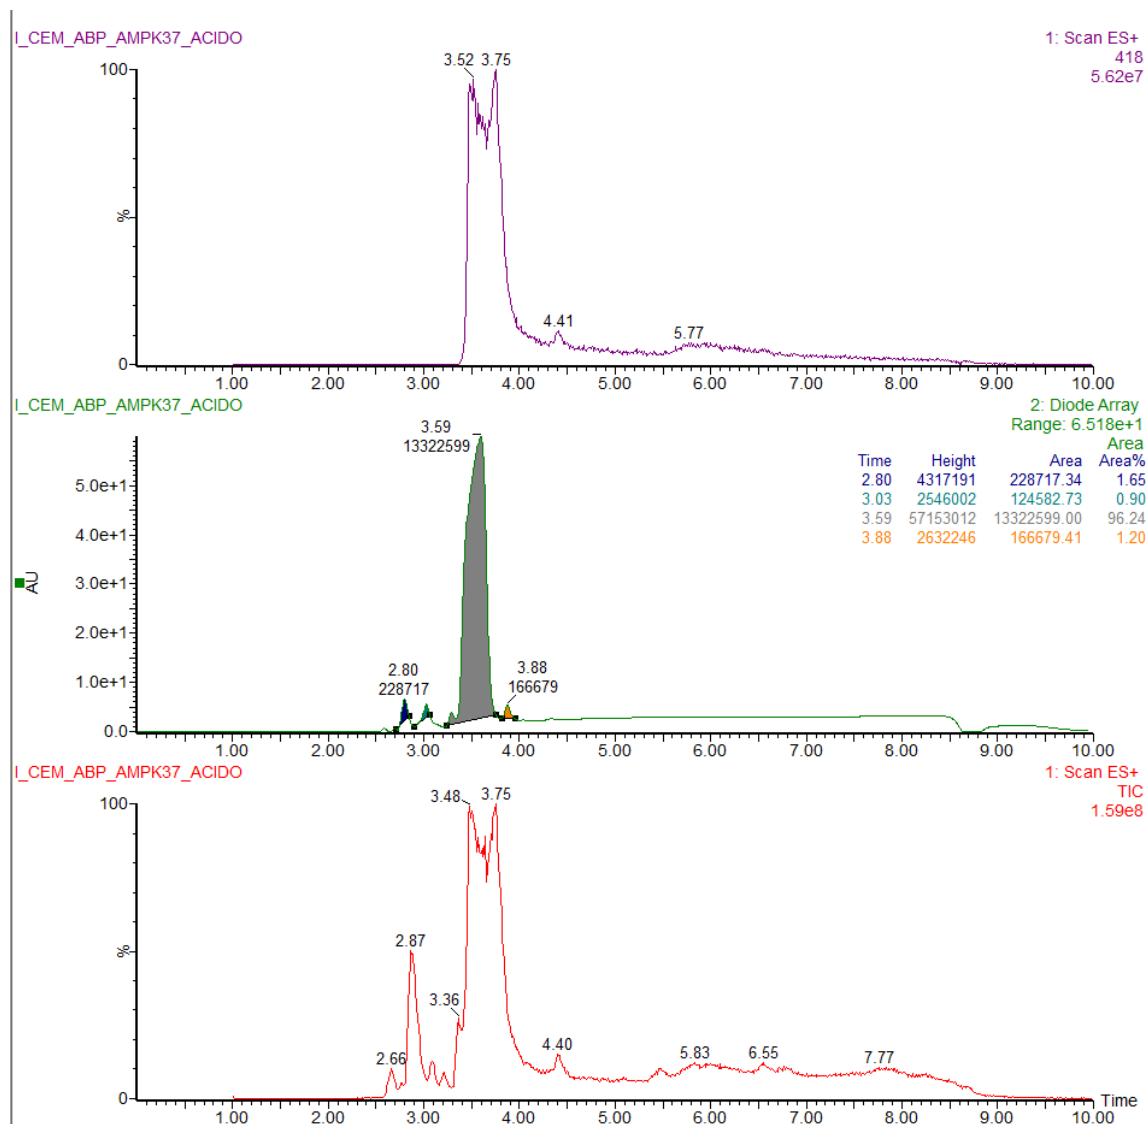

# 1-[4-Chloro-3-(trifluoromethyl)phenoxy]-3-(dibenzylamino)propan-2-ol

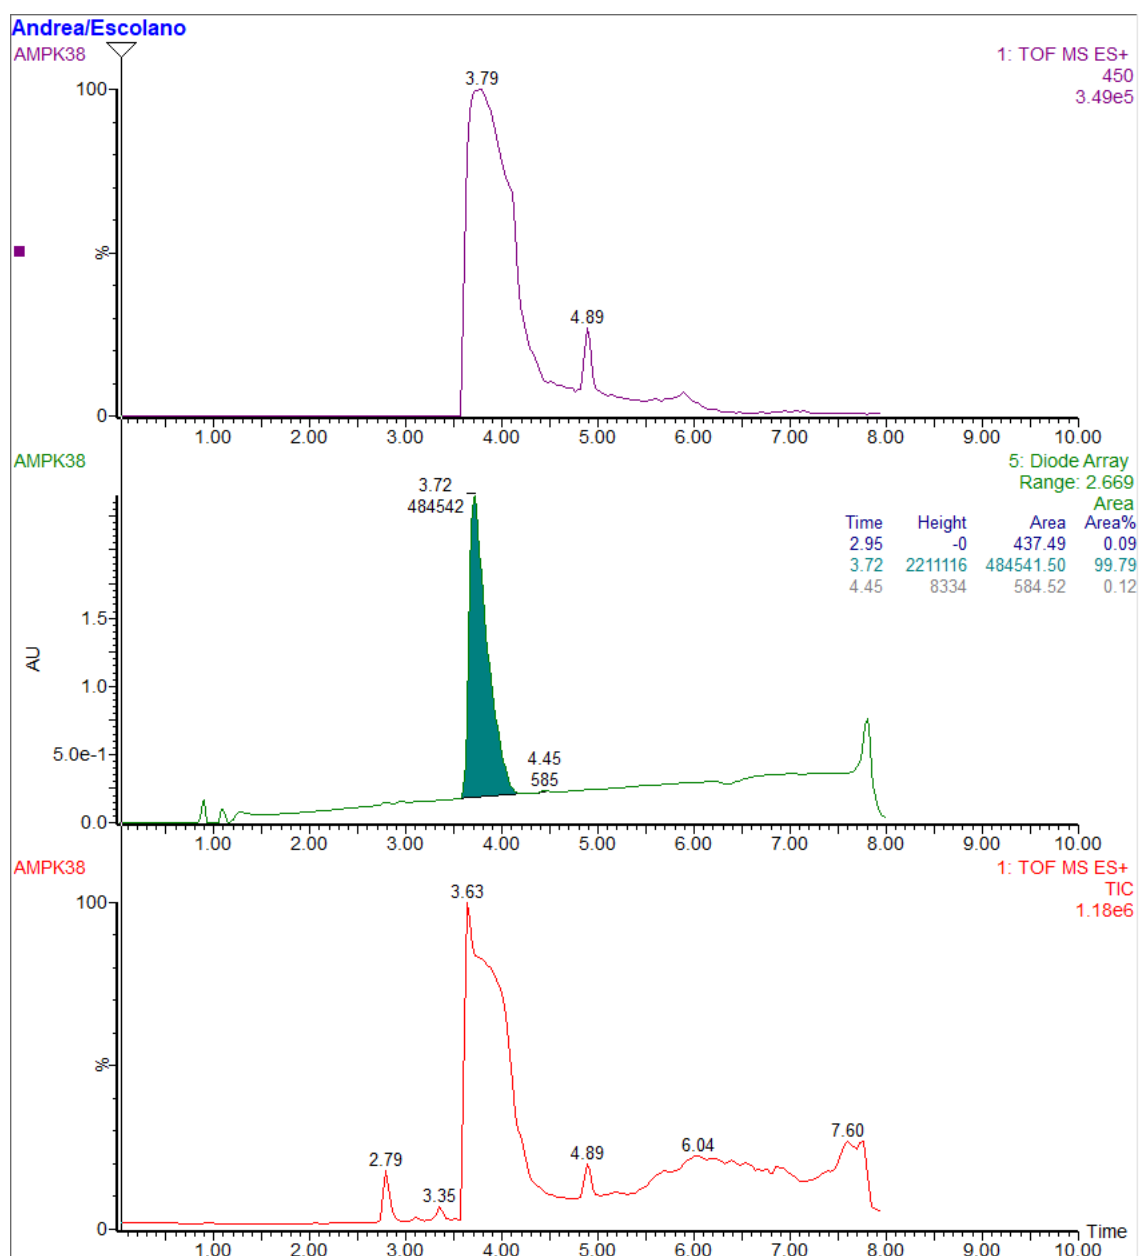



# 1-(Dibenzylamino)-3-[4-nitro-3-(trifluoromethyl)phenoxy]propan-2-ol

Andrea/Escolano

AMPK39

1: TOF MS ES+  
461  
4.33e5

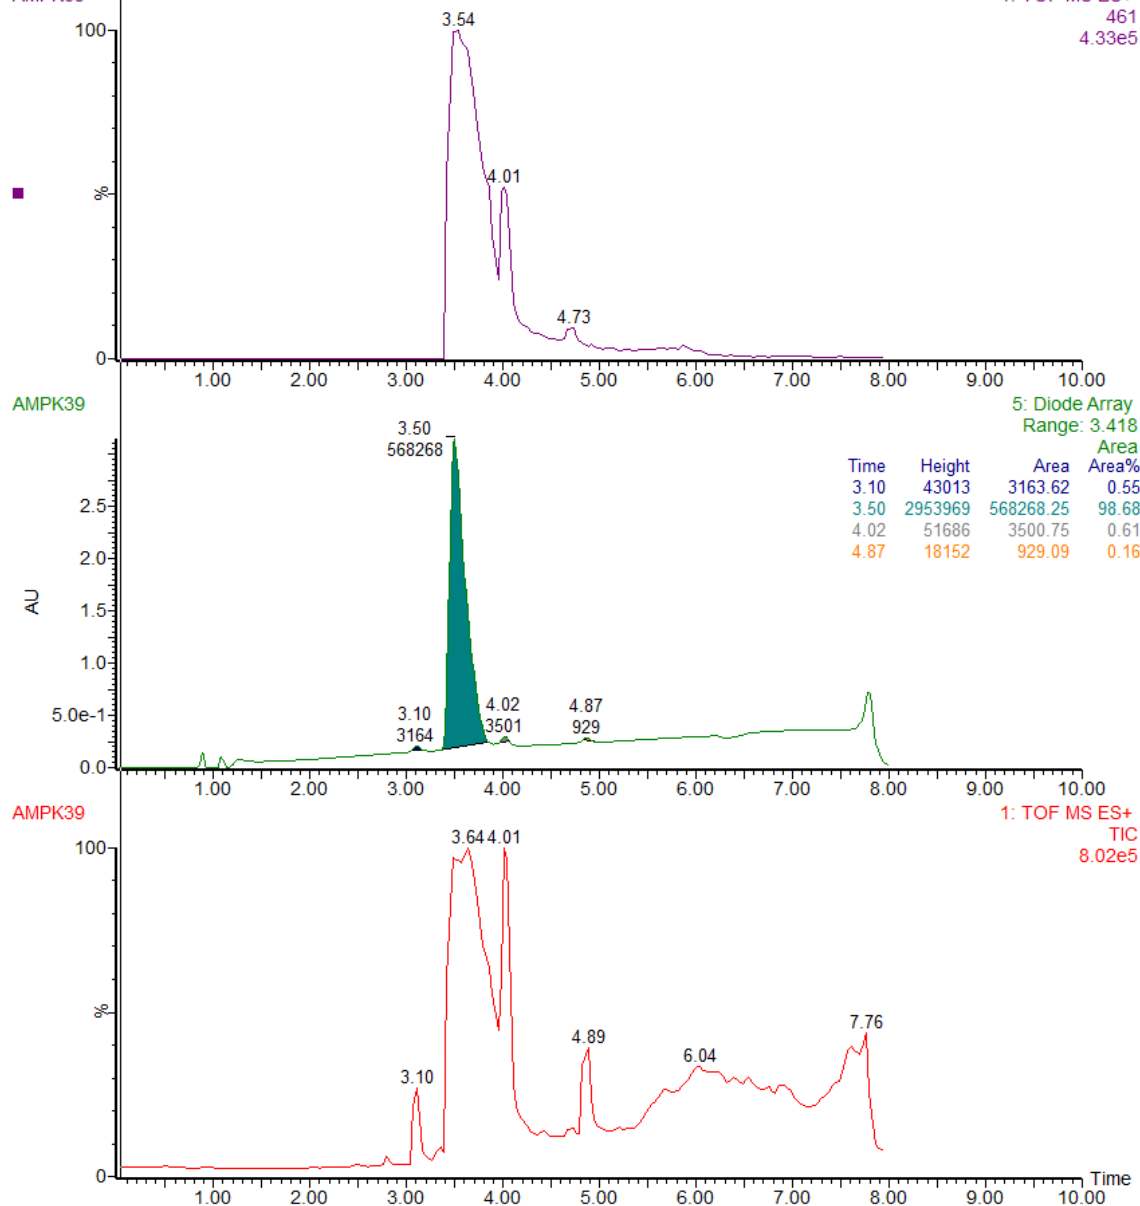

1-[Benzyl(phenyl)amino]-3-[4-(trifluoromethyl)phenoxy]propan-2-ol

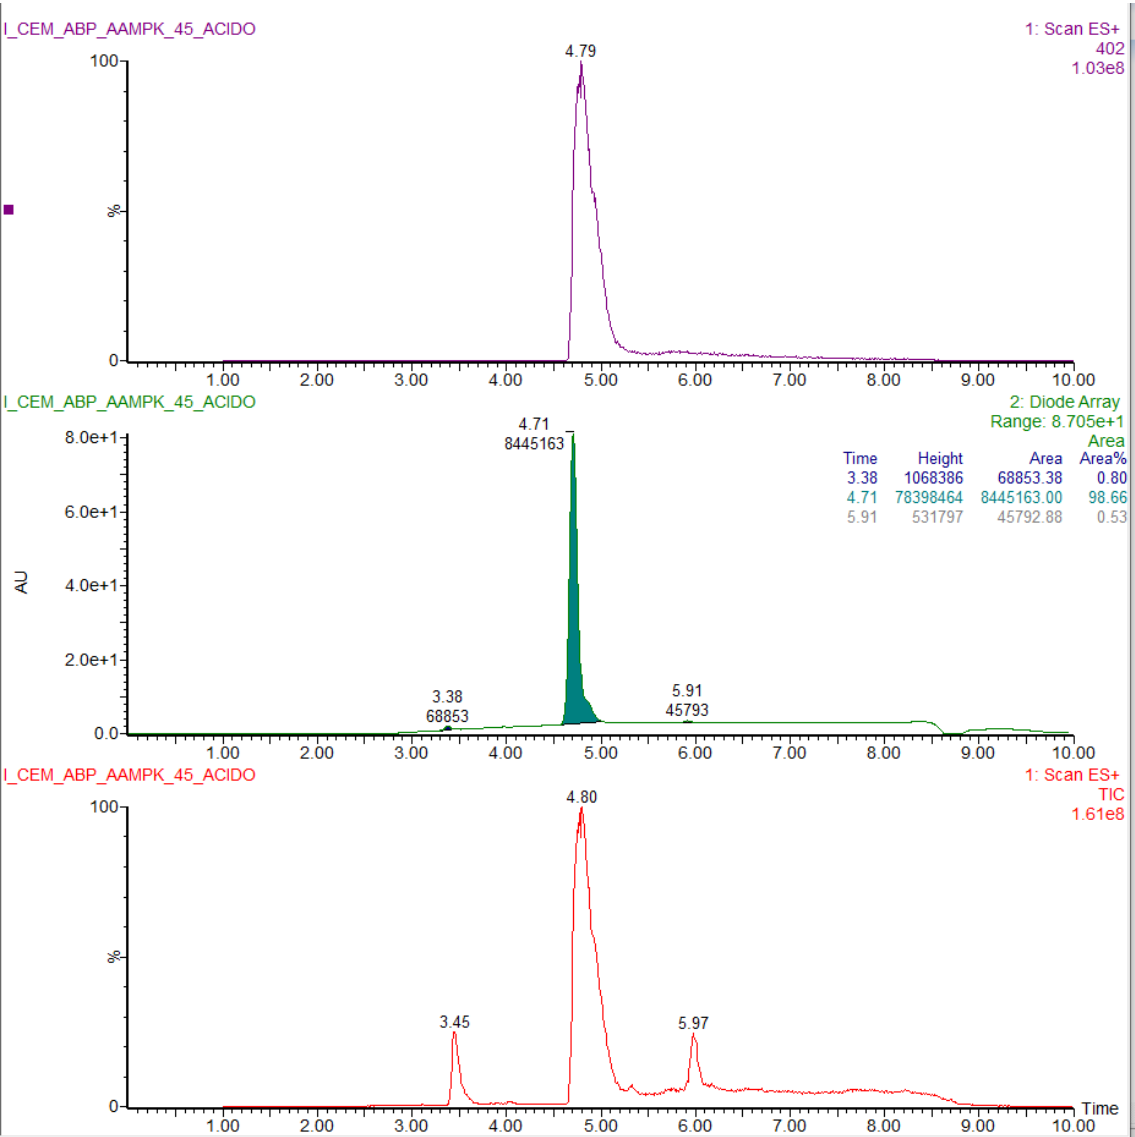

# 1-(Benzylamino)-3-[4-(trifluoromethyl)phenoxy]propan-2-ol

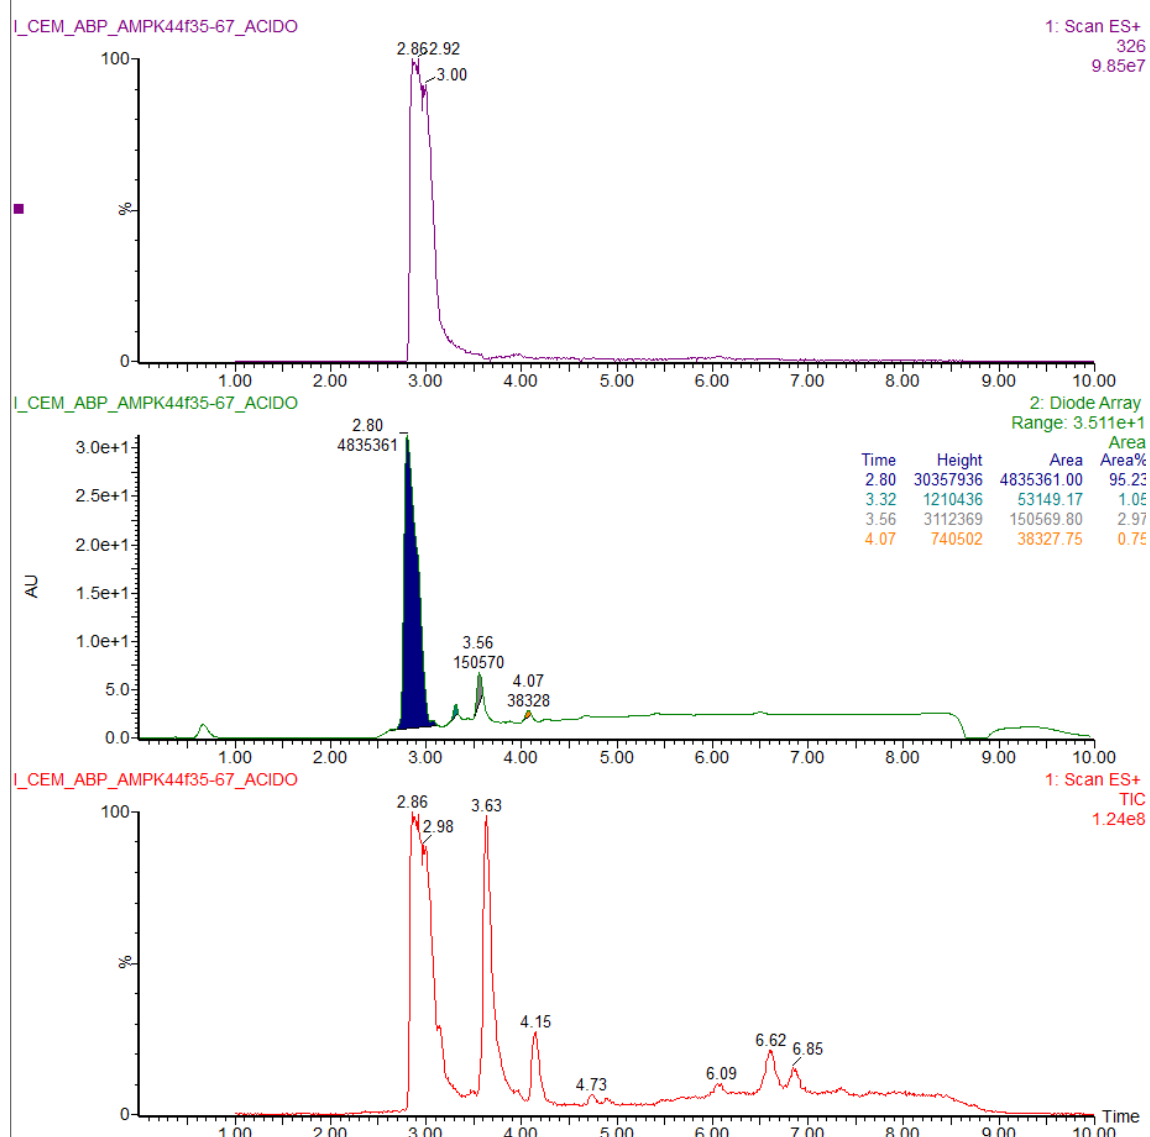

# 1-[Methyl(phenyl)amino]-3-[4-(trifluoromethyl)phenoxy]propan-2-ol

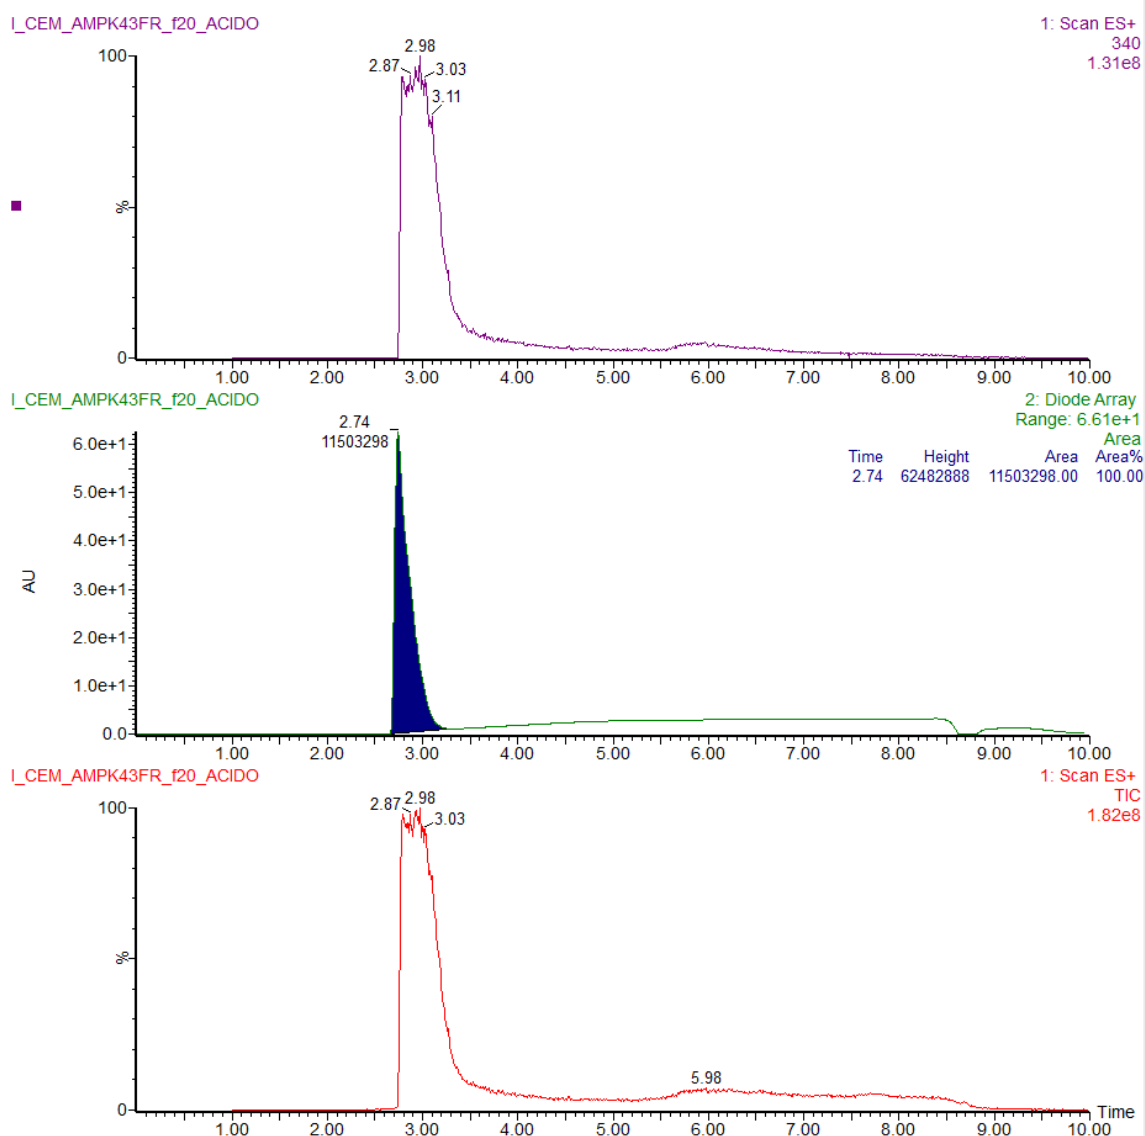

1-(Dimethylamino)-3-[4-(trifluoromethyl)phenoxy]propan-2-ol

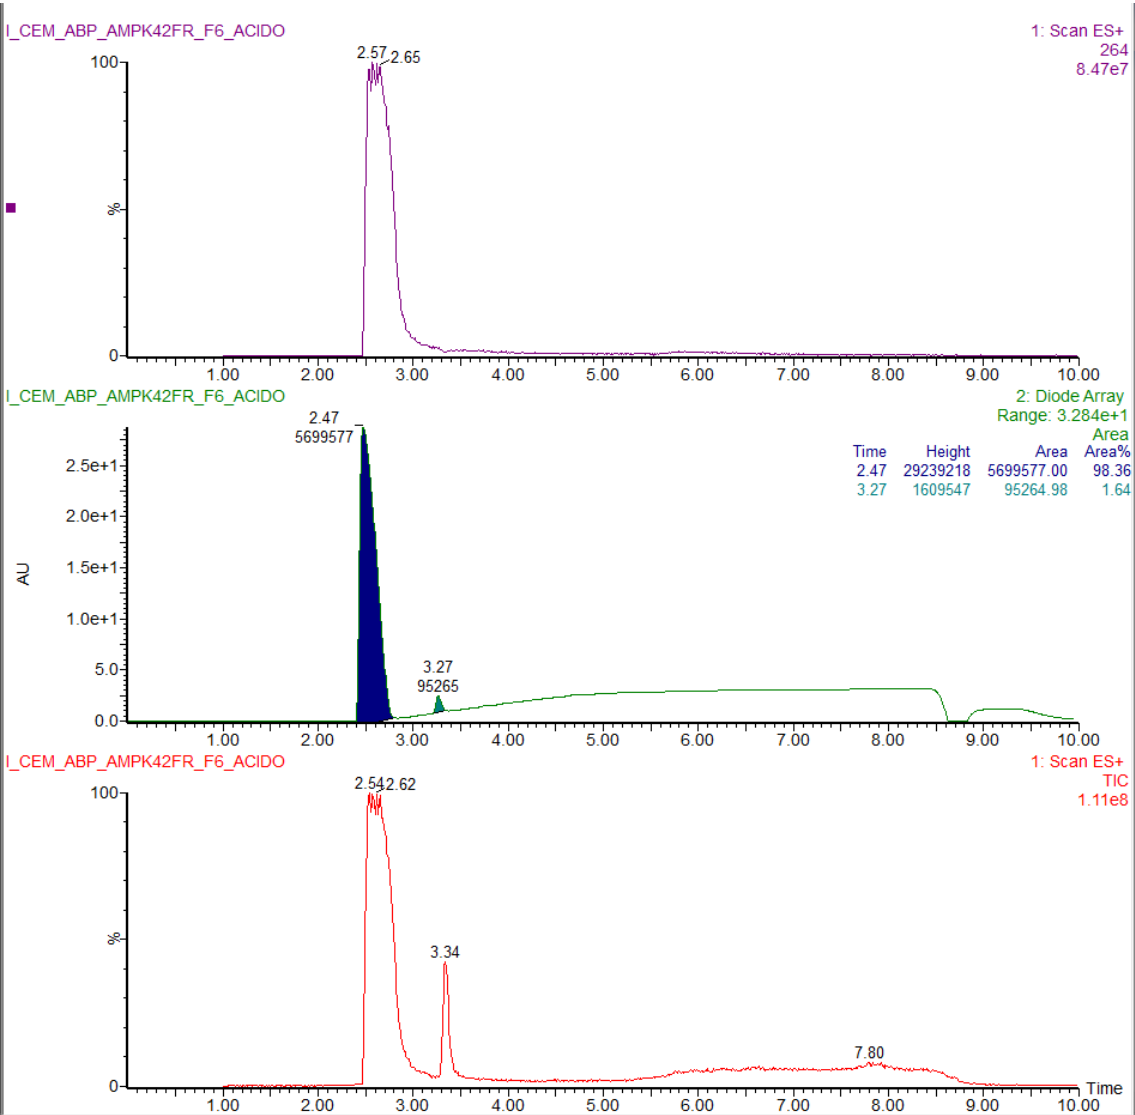

## Molecular Formula Strings (Smiles)

| Compound | SMILE                                                                               |
|----------|-------------------------------------------------------------------------------------|
| BC1618   | <chem>OC(COC1=CC=C(C(F)(F)F)C=C1)CN(CC2=CC=CC=C2)CC3=CC=CC=C3</chem>                |
| 1        | <chem>OC(COC1=CC=C(C(F)(F)F)C=C1)CNCC2=CC=CC=C2</chem>                              |
| 2        | <chem>OC(COC1=CC=C(C(F)(F)F)C=C1)CN(C)CC2=CC=CC=C2</chem>                           |
| 3        | <chem>CN(C)CC(O)COC1=CC=C(C(F)(F)F)C=C1</chem>                                      |
| 4        | <chem>OC(COC1=CC=C(C(F)(F)F)C=C1)CN(CC2=CC=CC=C2)C3=CC=CC=C3</chem>                 |
| 5        | <chem>OC(COC1=CC=C(C(F)(F)F)C=C1)CN(CC2=CC=CC=C2)CC3=CC=CN=C3</chem>                |
| 6        | <chem>OC(COC1=CC=CC=C1)CN(CC2=CC=CC=C2)CC3=CC=CC=C3</chem>                          |
| 7        | <chem>ClC1=CC=C(OCC(O)CN(CC2=CC=CC=C2)CC3=CC=CC=C3)C=C1</chem>                      |
| 8        | <chem>CC1=CC=C(OCC(O)CN(CC2=CC=CC=C2)CC3=CC=CC=C3)C=C1</chem>                       |
| 9        | <chem>OC(COC1=CC=C(C(C)C)C=C1)CN(CC2=CC=CC=C2)CC3=CC=CC=C3</chem>                   |
| 10       | <chem>OC(COC1=CC=C(C(C)(C)C)C=C1)CN(CC2=CC=CC=C2)CC3=CC=CC=C3</chem>                |
| 11       | <chem>OC(COC1=CC=C(C2CCCC2)C=C1)CN(CC3=CC=CC=C3)CC4=CC=CC=C4</chem>                 |
| 12       | <chem>OC(COC1=CC=C(C2CCCC2)C=C1)CN(CC3=CC=CC=C3)CC4=CC=CC=C4</chem>                 |
| 13       | <chem>CC1=C(C)C=C(OCC(O)CN(CC2=CC=CC=C2)CC3=CC=CC=C3)C=C1</chem>                    |
| 14       | <chem>OC(COC1=CC=C(OC)C=C1)CN(CC2=CC=CC=C2)CC3=CC=CC=C3</chem>                      |
| 15       | <chem>OC(COC1=CC=C(OCC2=CC=CC=C2)C=C1)CN(CC3=CC=CC=C3)CC4=CC=CC=C4</chem>           |
| 16       | <chem>OC(COC1=CC=C(OCCC)C=C1)CN(CC2=CC=CC=C2)CC3=CC=CC=C3</chem>                    |
| 17       | <chem>ClC1=C(Cl)C=C(OCC(O)CN(CC2=CC=CC=C2)CC3=CC=CC=C3)C=C1</chem>                  |
| 18       | <chem>ClC1=C(C(F)(F)F)C=C(OCC(O)CN(CC2=CC=CC=C2)CC3=CC=CC=C3)C=C1</chem>            |
| 19       | <chem>OC(COC1=CC(C(F)(F)F)=C([N+])([O-])=O)C=C1)CN(CC2=CC=CC=C2)CC3=CC=CC=C3</chem> |
| 20       | <chem>ClC1=CC(Cl)=C(OCC(O)CN(CC2=CC=CC=C2)CC3=CC=CC=C3)C=C1</chem>                  |
| 21       | <chem>BrC1=CC=C(OCC(O)CN(CC2=CC=CC=C2)CC3=CC=CC=C3)C=C1</chem>                      |
| 22       | <chem>OC(COC1=CC=C([N+])([O-])=O)C=C1)CN(CC2=CC=CC=C2)CC3=CC=CC=C3</chem>           |
| 23       | <chem>IC1=CC=C(OCC(O)CN(CC2=CC=CC=C2)CC3=CC=CC=C3)C=C1</chem>                       |
| 24       | <chem>OC(COC1=CC=C(S(F)(F)F)C=C1)CN(CC2=CC=CC=C2)CC3=CC=CC=C3</chem>                |
| 25       | <chem>ClC1=CC=C(OCC(O)CN(CC2=CC=C(Cl)C=C2)CC3=CC=CC=C3)C=C1</chem>                  |
| 26       | <chem>OC(COC1=CC=C(Cl)C=C1)CN(CC2=CC=C(Cl)C=C2)CC3=CC=C(Cl)C=C3</chem>              |
| 27       | <chem>ClC1=CC=C(OCC(O)CN(CC2=CC=C(C)C=C2)CC3=CC=CC=C3)C=C1</chem>                   |
| 28       | <chem>ClC1=CC=C(OCC(O)CN(CC2=CC=C(C)C=C2)CC3=CC=C(C)C=C3)C=C1</chem>                |
| 29       | <chem>ClC1=CC=C(OCC(O)CN(CC2=CC=C(C)C=C2)CC3=CC=CC=C3)C=C1</chem>                   |
| 30       | <chem>OC(COC1=CC=C(Cl)C=C1)CN(CC2=CC=C(Cl)C(Cl)=C2)CC3=CC=CC=C3</chem>              |
| 31       | <chem>OC(COC1=CC=C(Cl)C=C1)CN(CC2=CC=C(Cl)C(Cl)=C2)CC3=CC=C(Cl)C=C3</chem>          |
| 32       | <chem>OC(COC1=CC=C(Cl)C=C1)CN(CC2=CC=C(Cl)C(Cl)=C2)CC3=CC=C(C)C=C3</chem>           |
| 33       | <chem>ClC1=CC=C(OCC(O)CN(CC2=CC=CC=C2)CC3=CC=C(OC)C=C3)C=C1</chem>                  |
| 34       | <chem>ClC1=CC=C(OCC(O)CN(CC2=CC=C(OC)C=C2)CC3=CC=C(OC)C=C3)C=C1</chem>              |
| 35       | <chem>OC(COC1=CC=C(Cl)C=C1)CN(CC2=CC=C(Cl)C(Cl)=C2)CC3=CC=C(OC)C=C3</chem>          |

1-(4-Chlorophenoxy)-3-(dibenzylamino)propan-2-ol

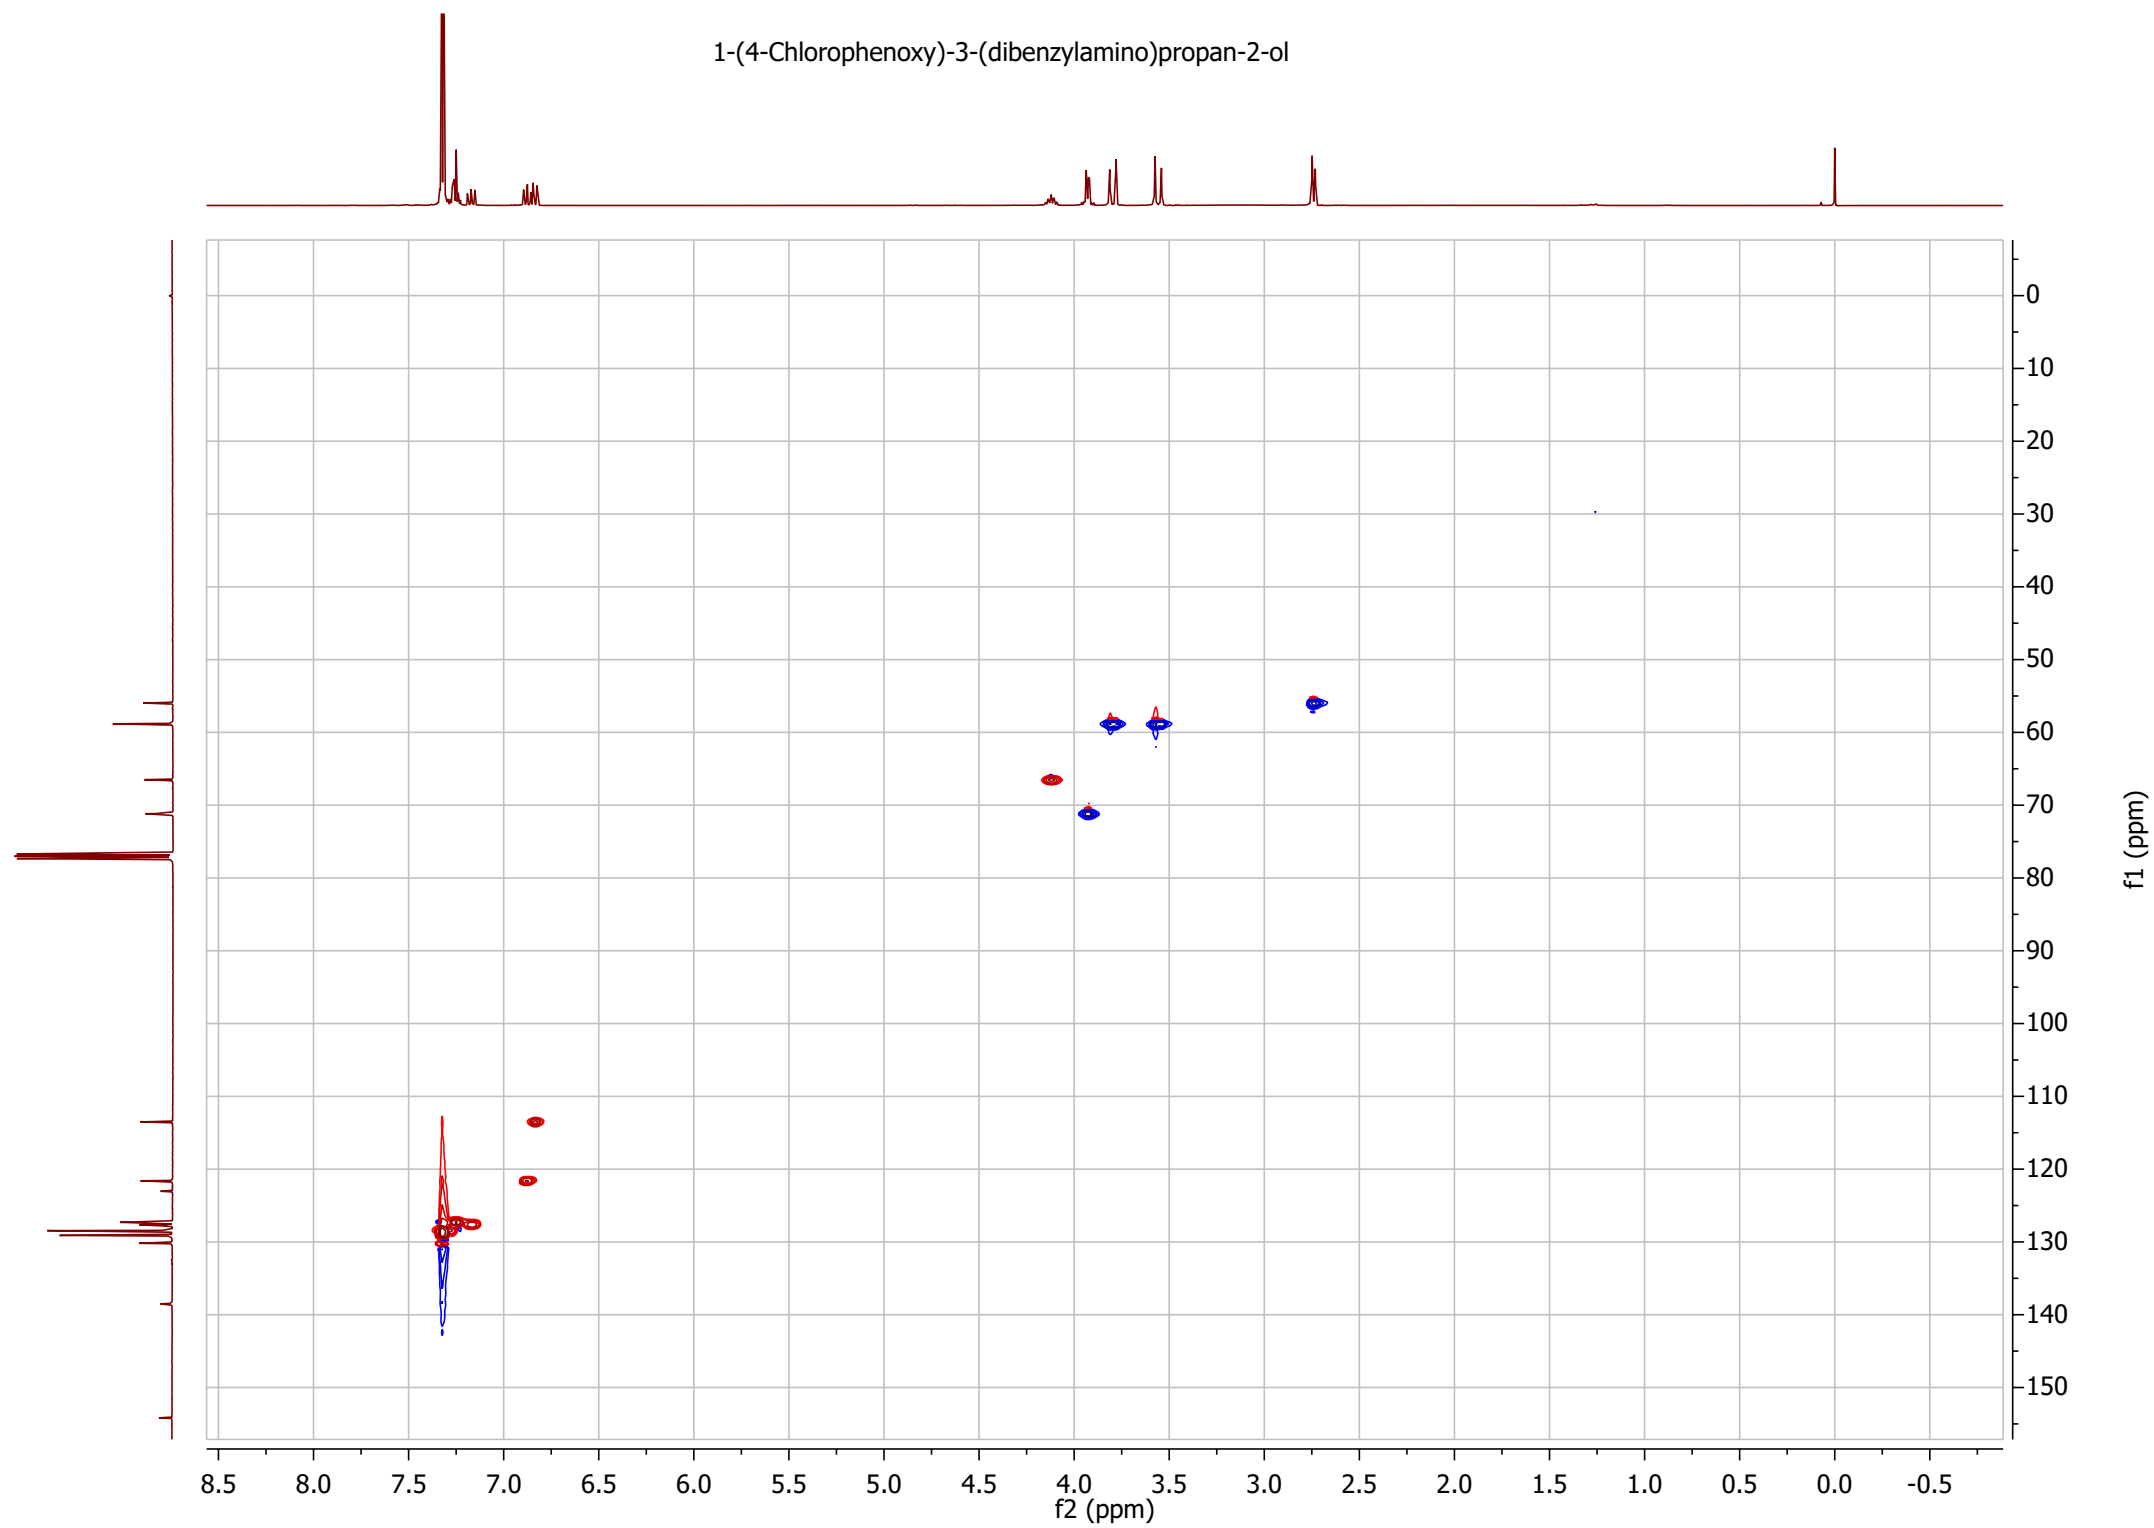

1-(Dibenzylamino)-3-(p-tolyloxy)propan-2-ol

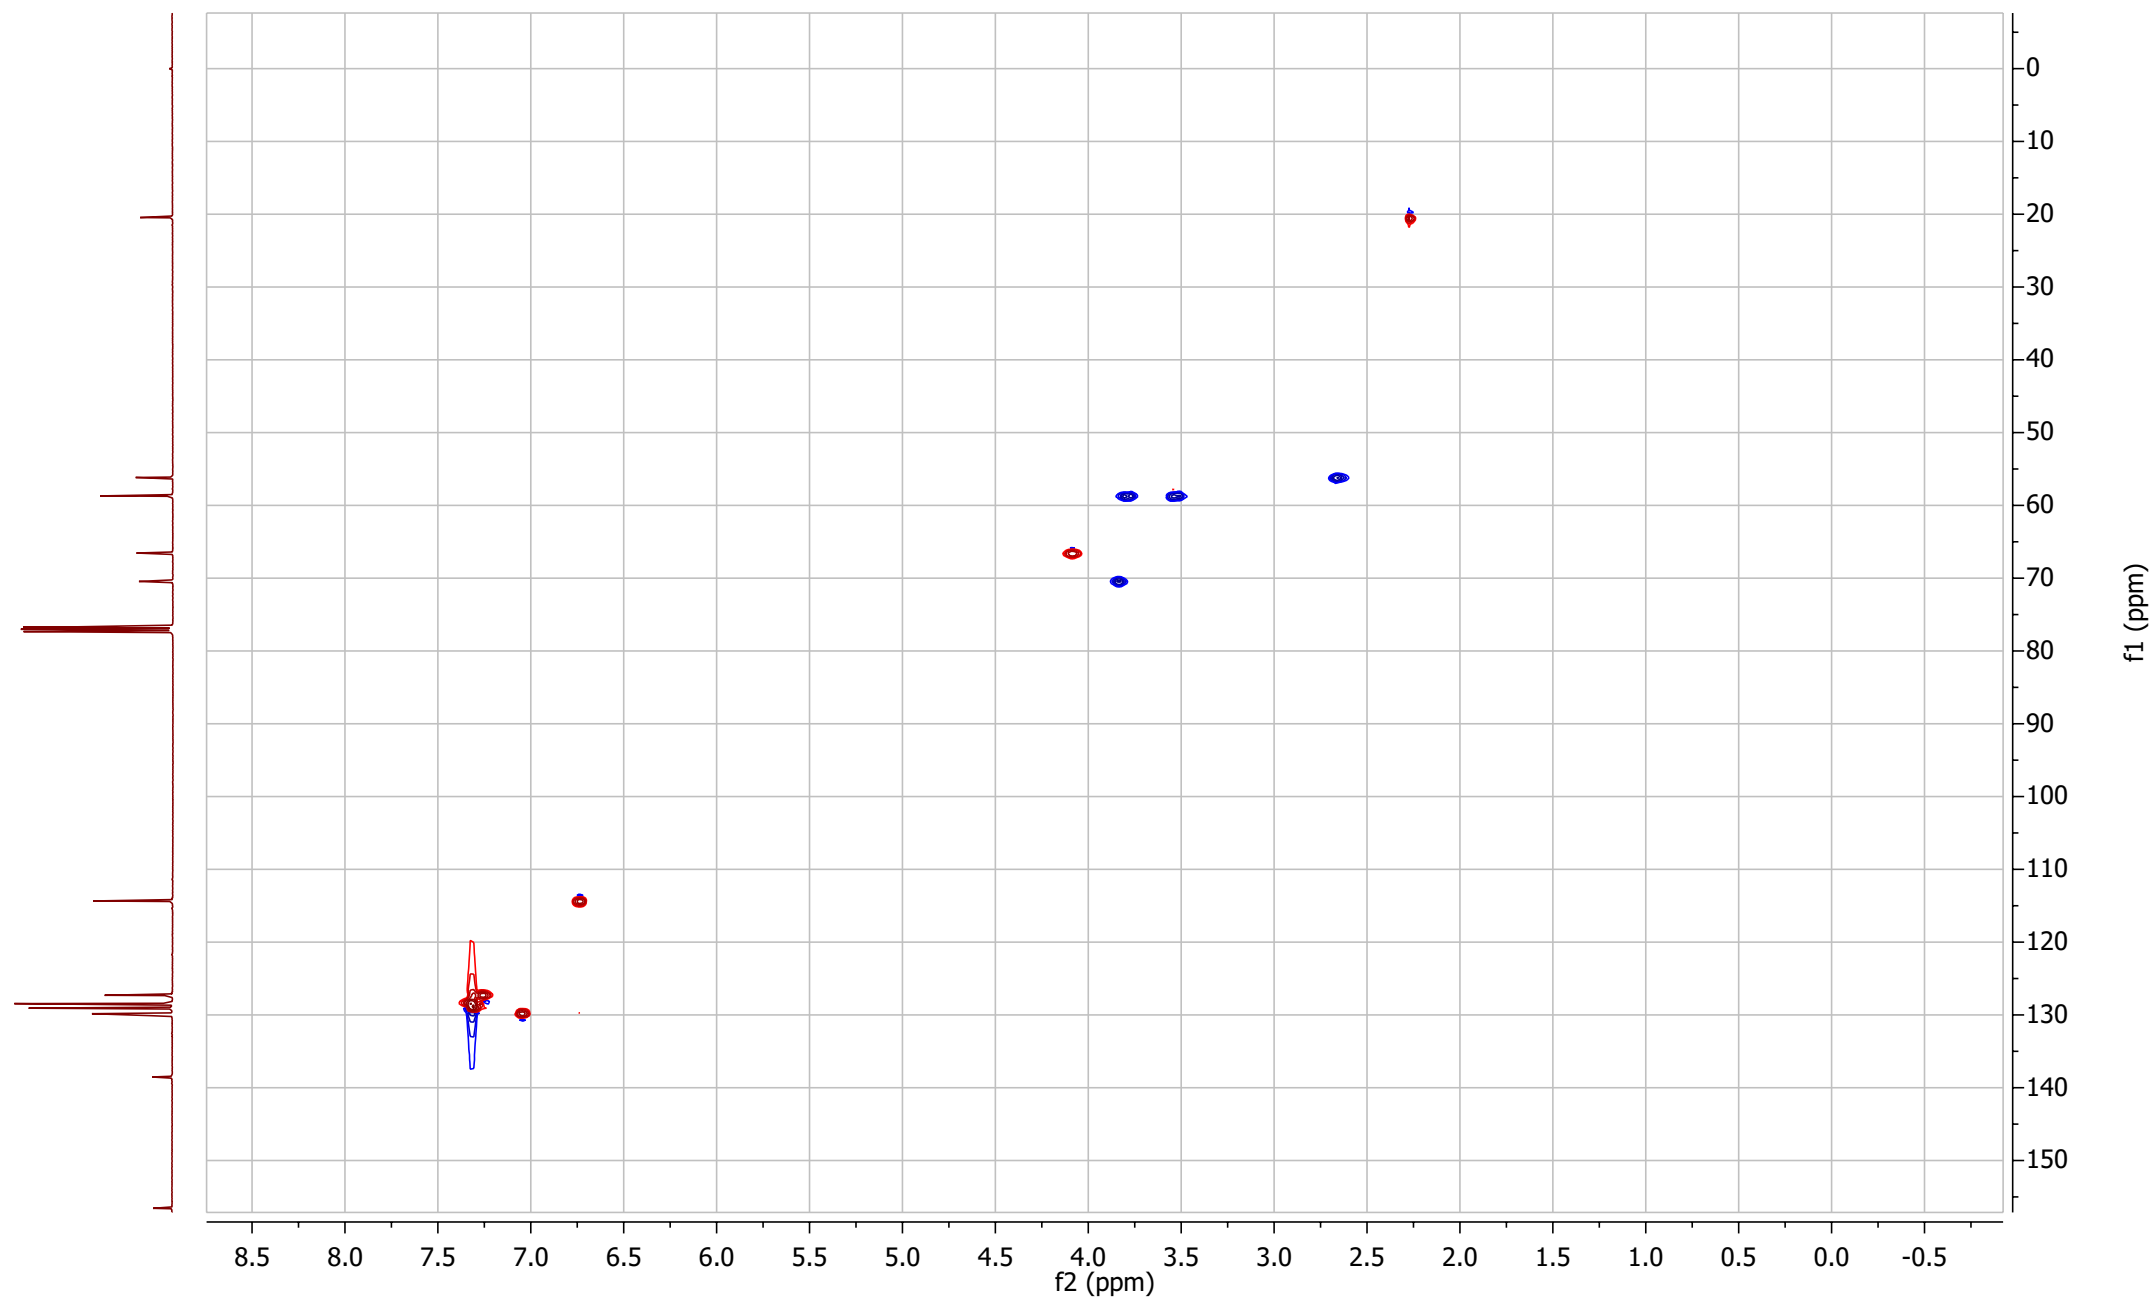



1-(4-Cyclohexylphenoxy)-3-(dibenzylamino)propan-2-ol

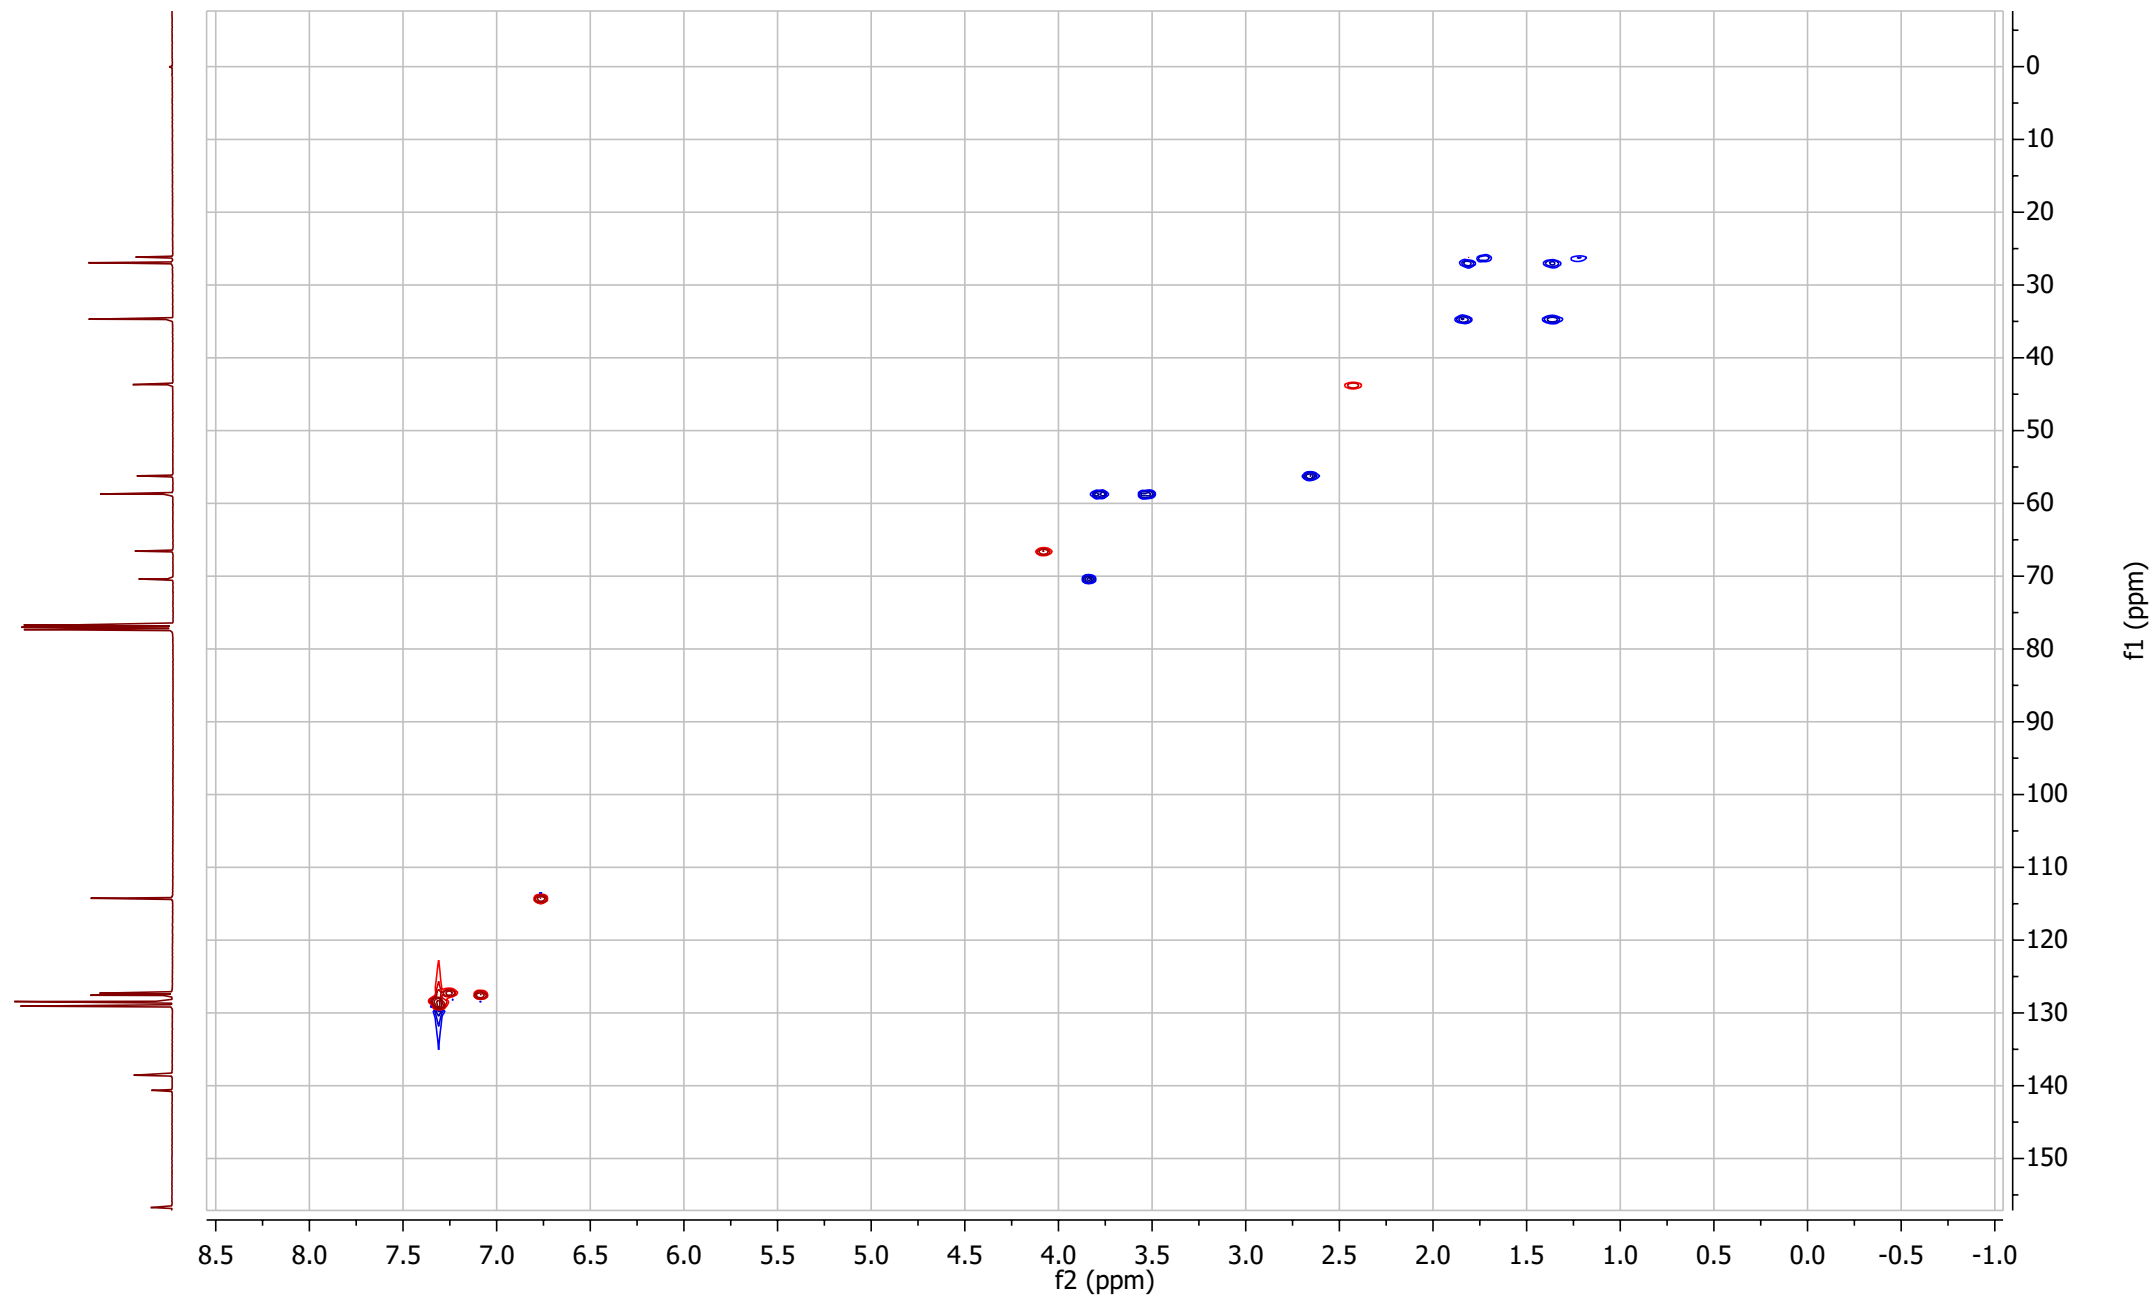

1-[4-(Tert-butyl)phenoxy]-3-(dibenzylamino)propan-2-ol

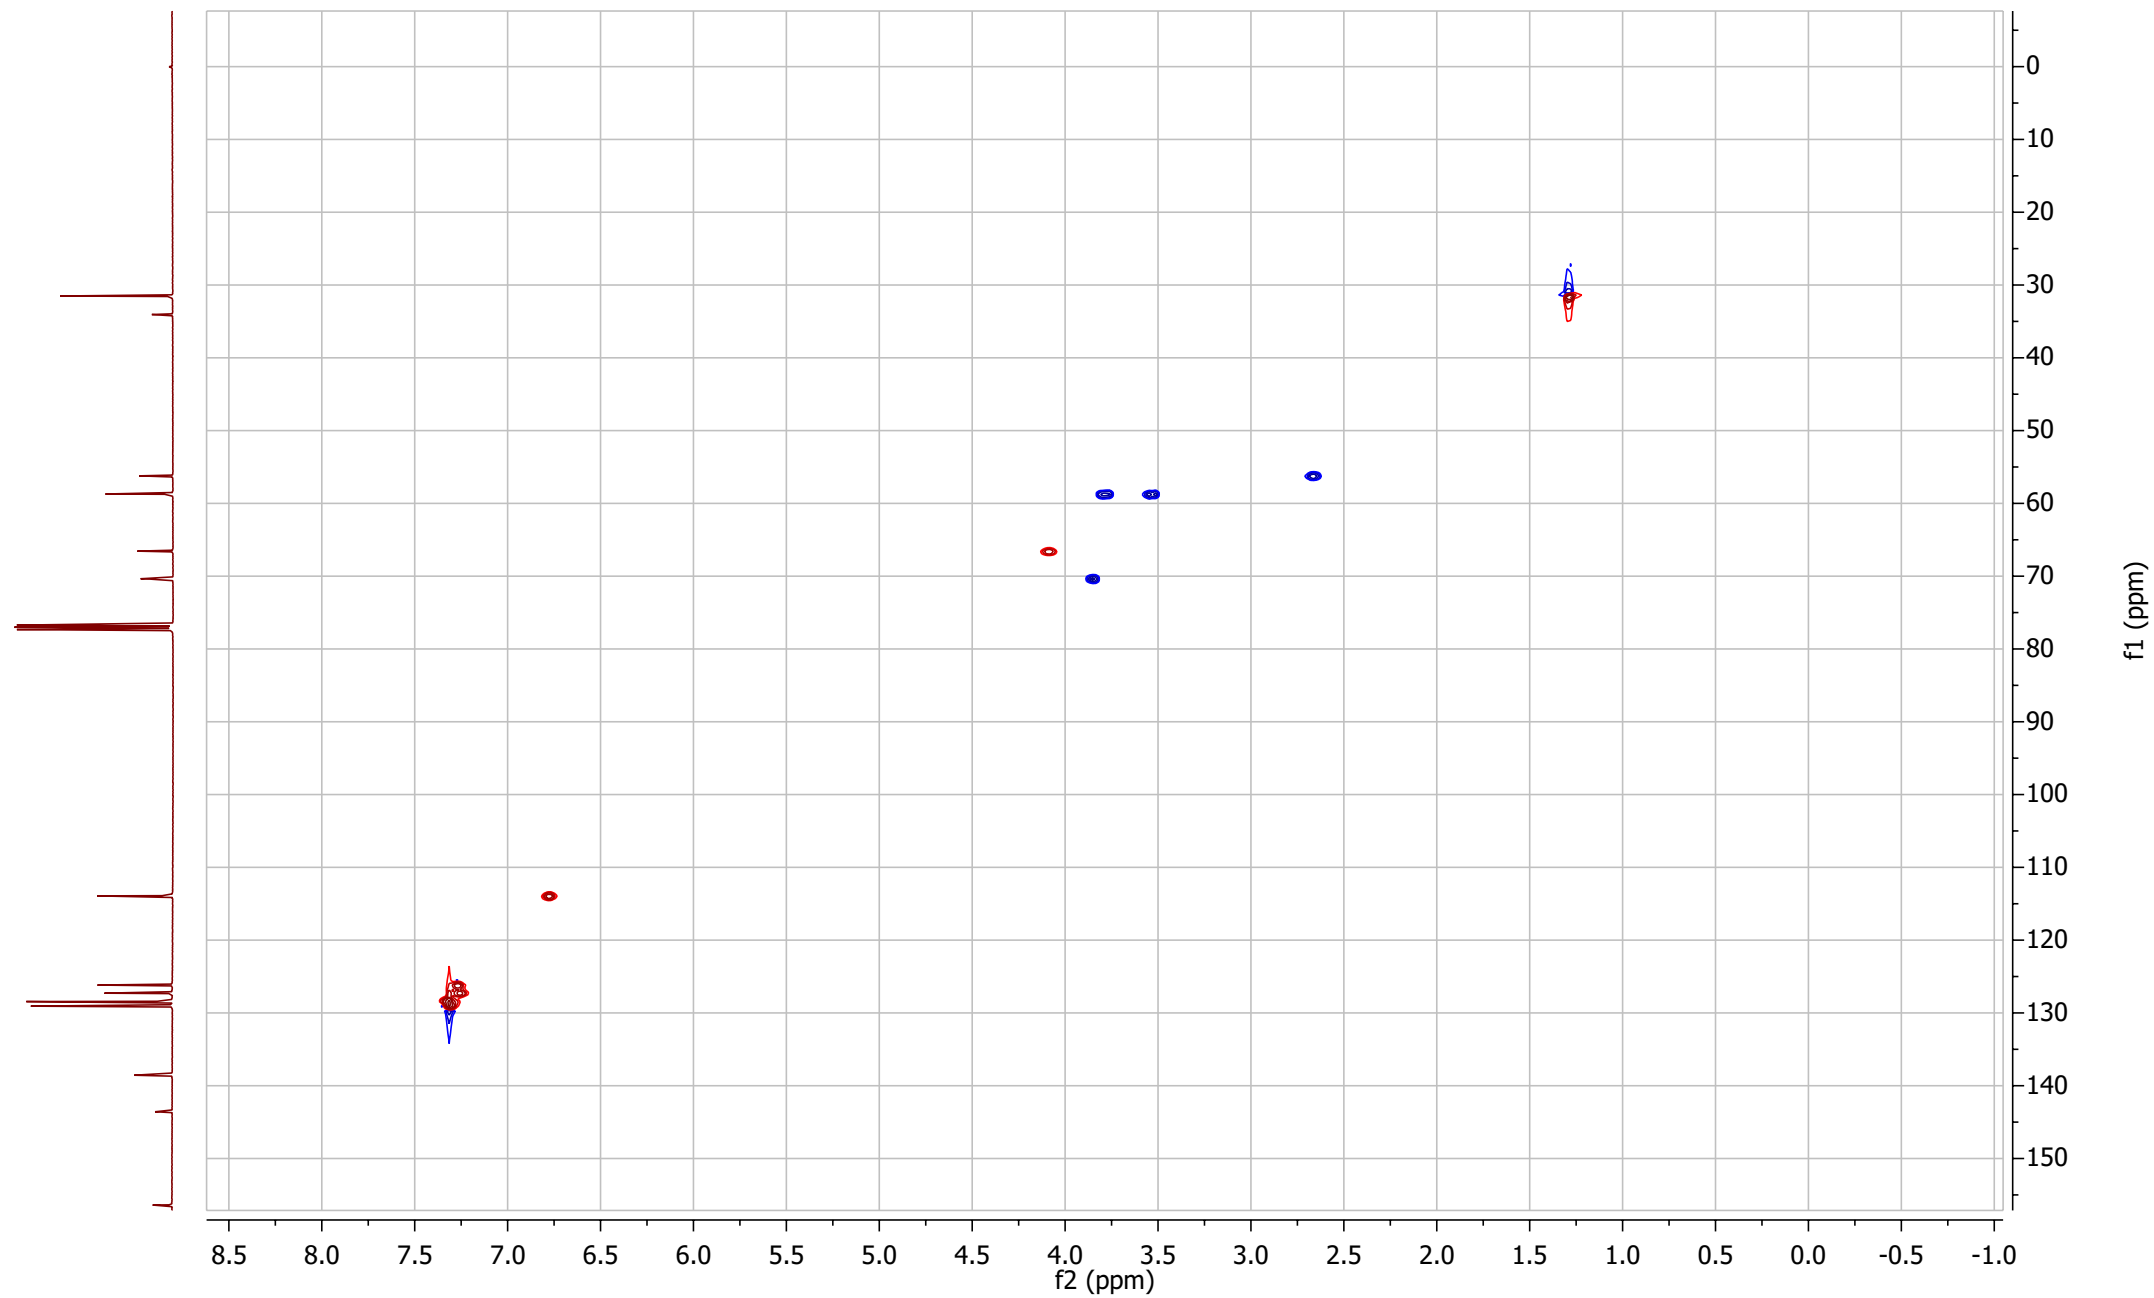

1-[4-(Benzyloxy)phenoxy]-3-(dibenzylamino)propan-2-ol

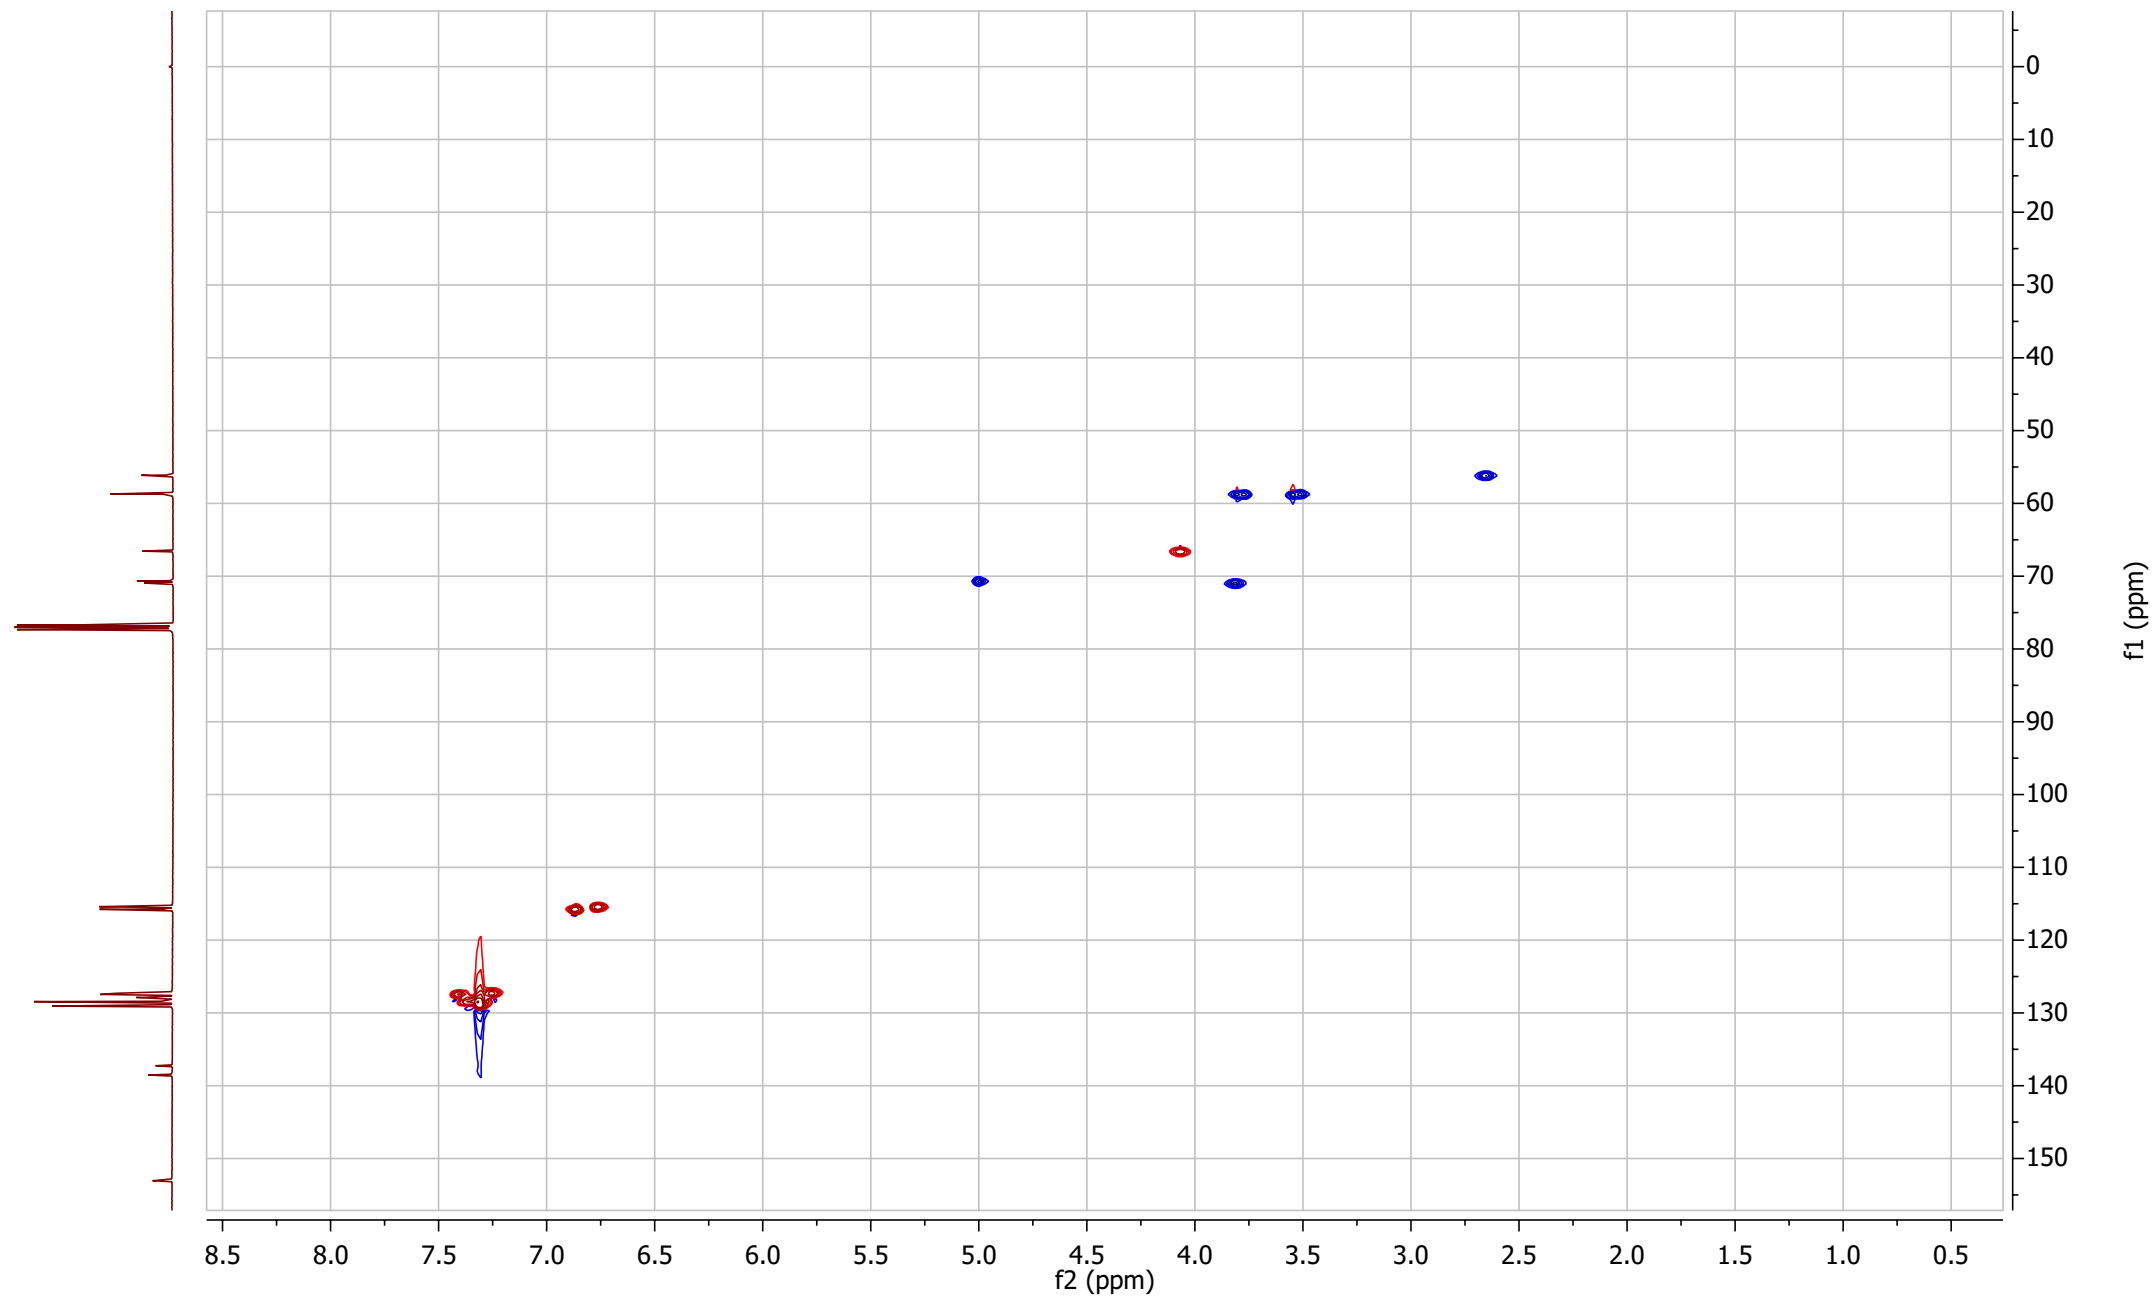

1-(Dibenzylamino)-3-(2,4-dichlorophenoxy)propan-2-ol

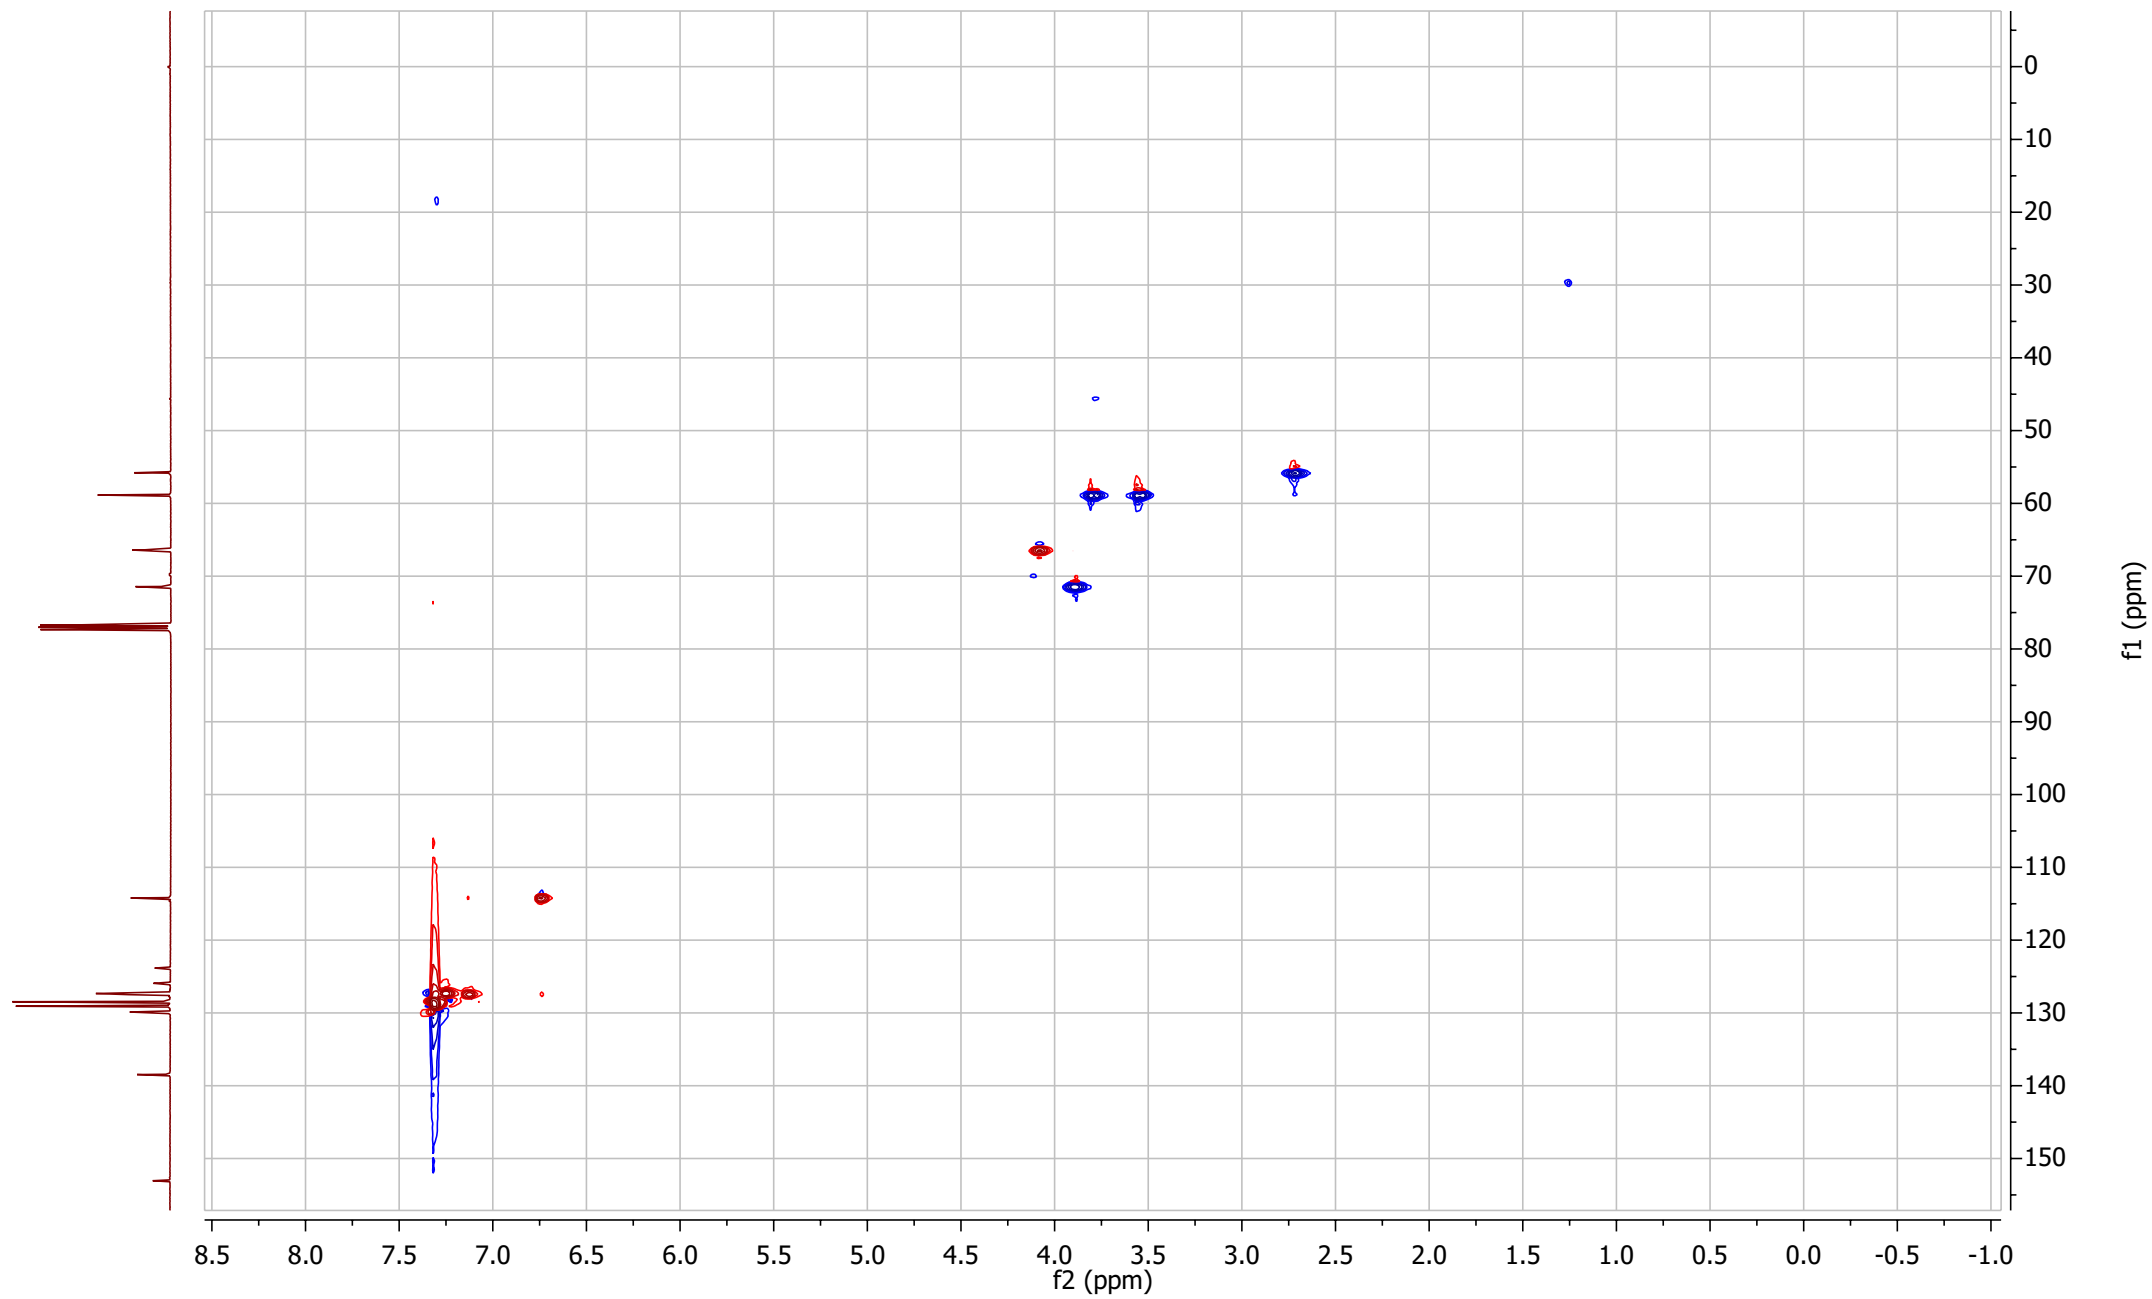

1-(4-Cyclopentylphenoxy)-3-(dibenzylamino)propan-2-ol

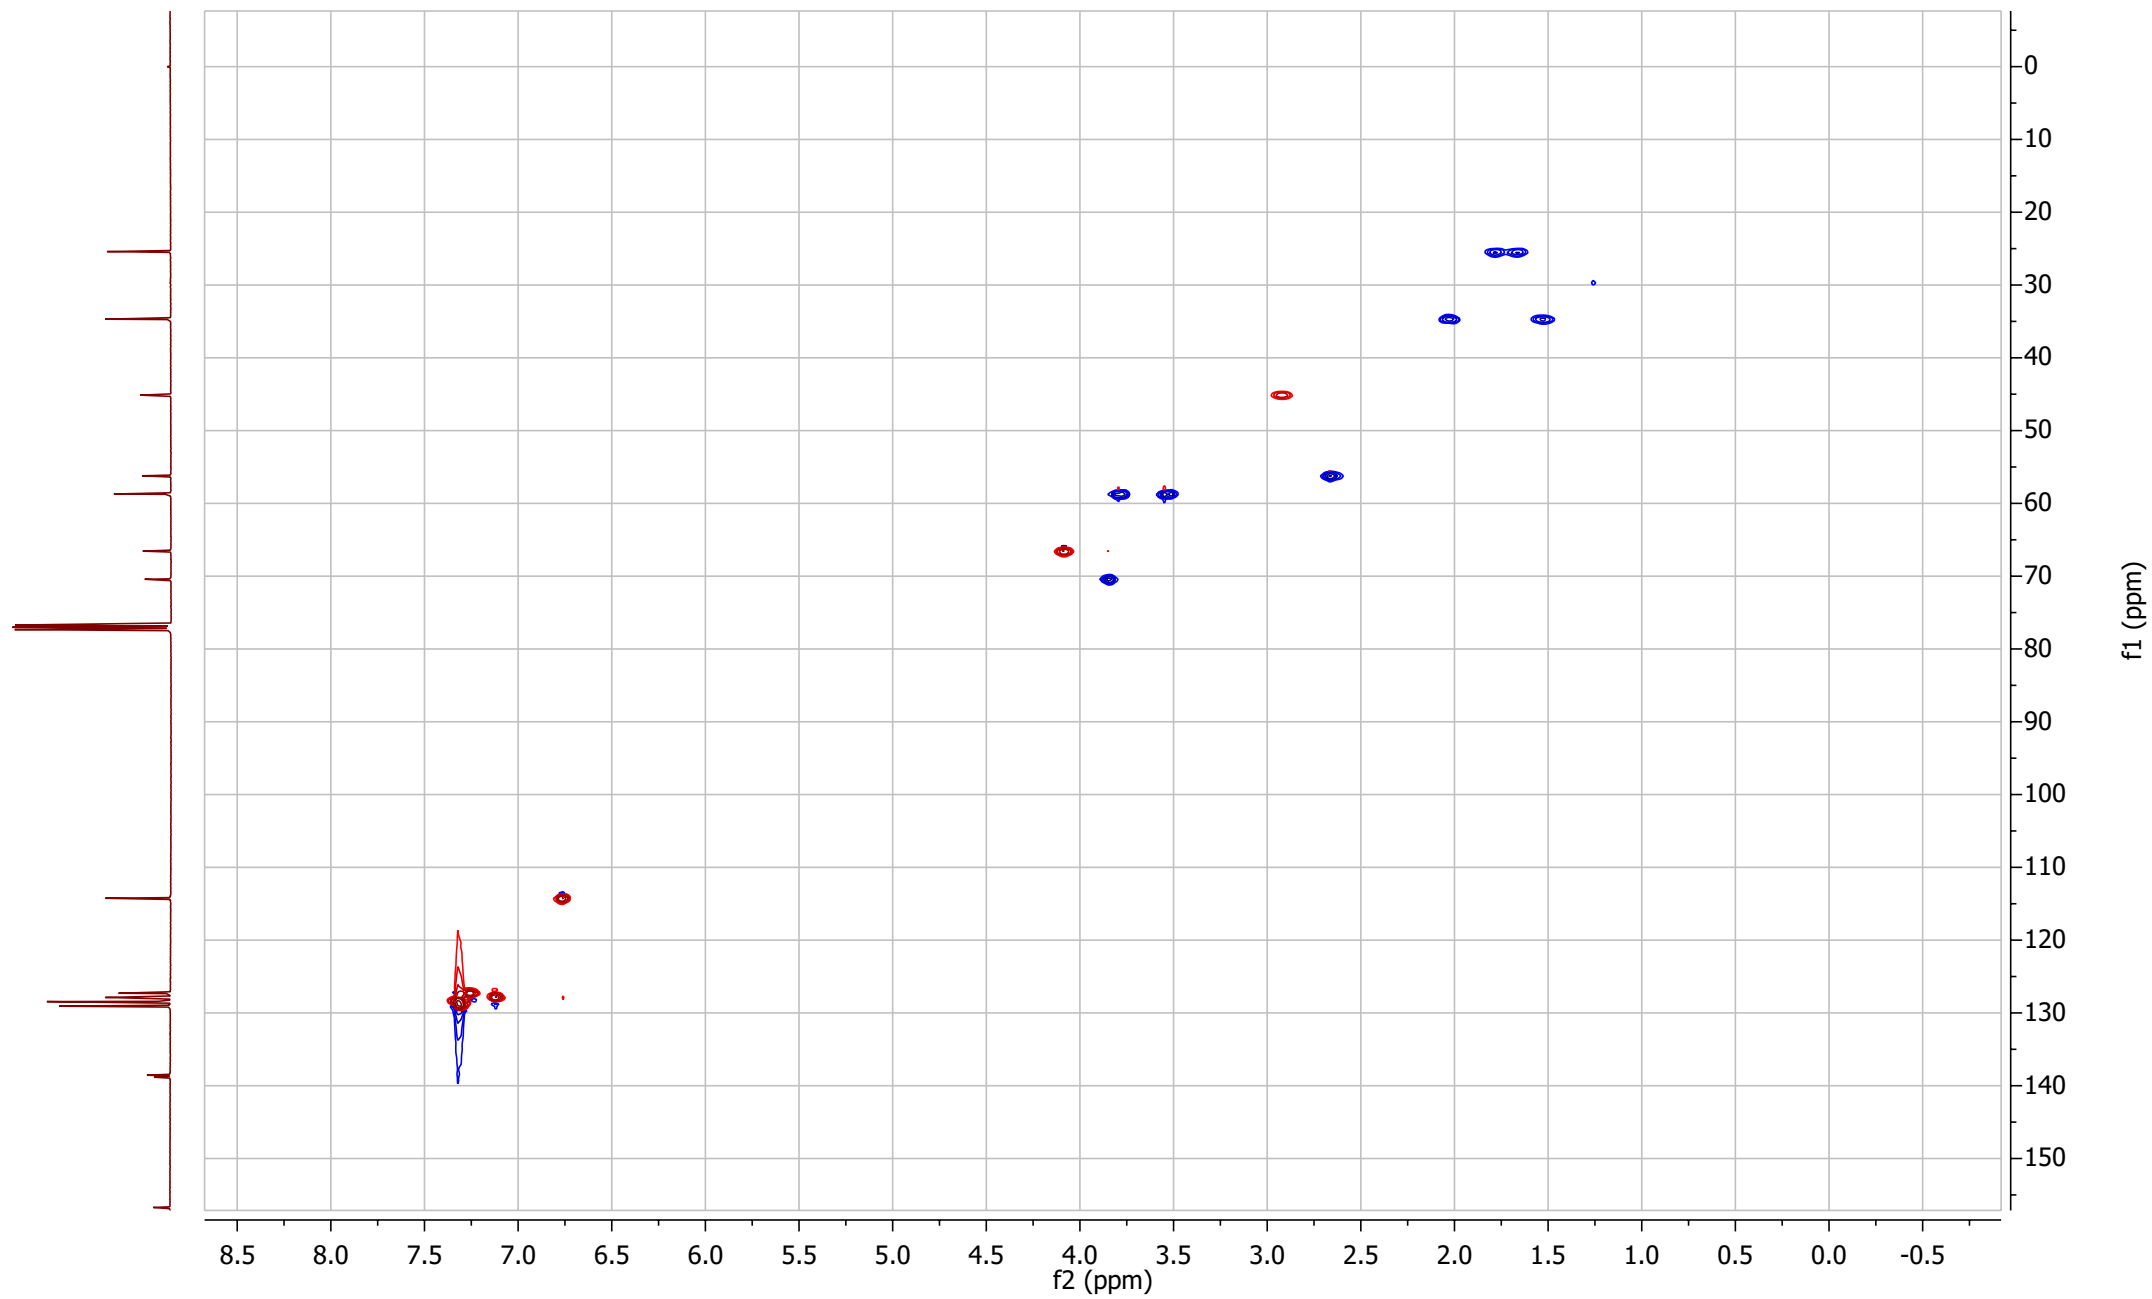

1-(Dibenzylamino)-3-(4-isopropylphenoxy)propan-2-ol

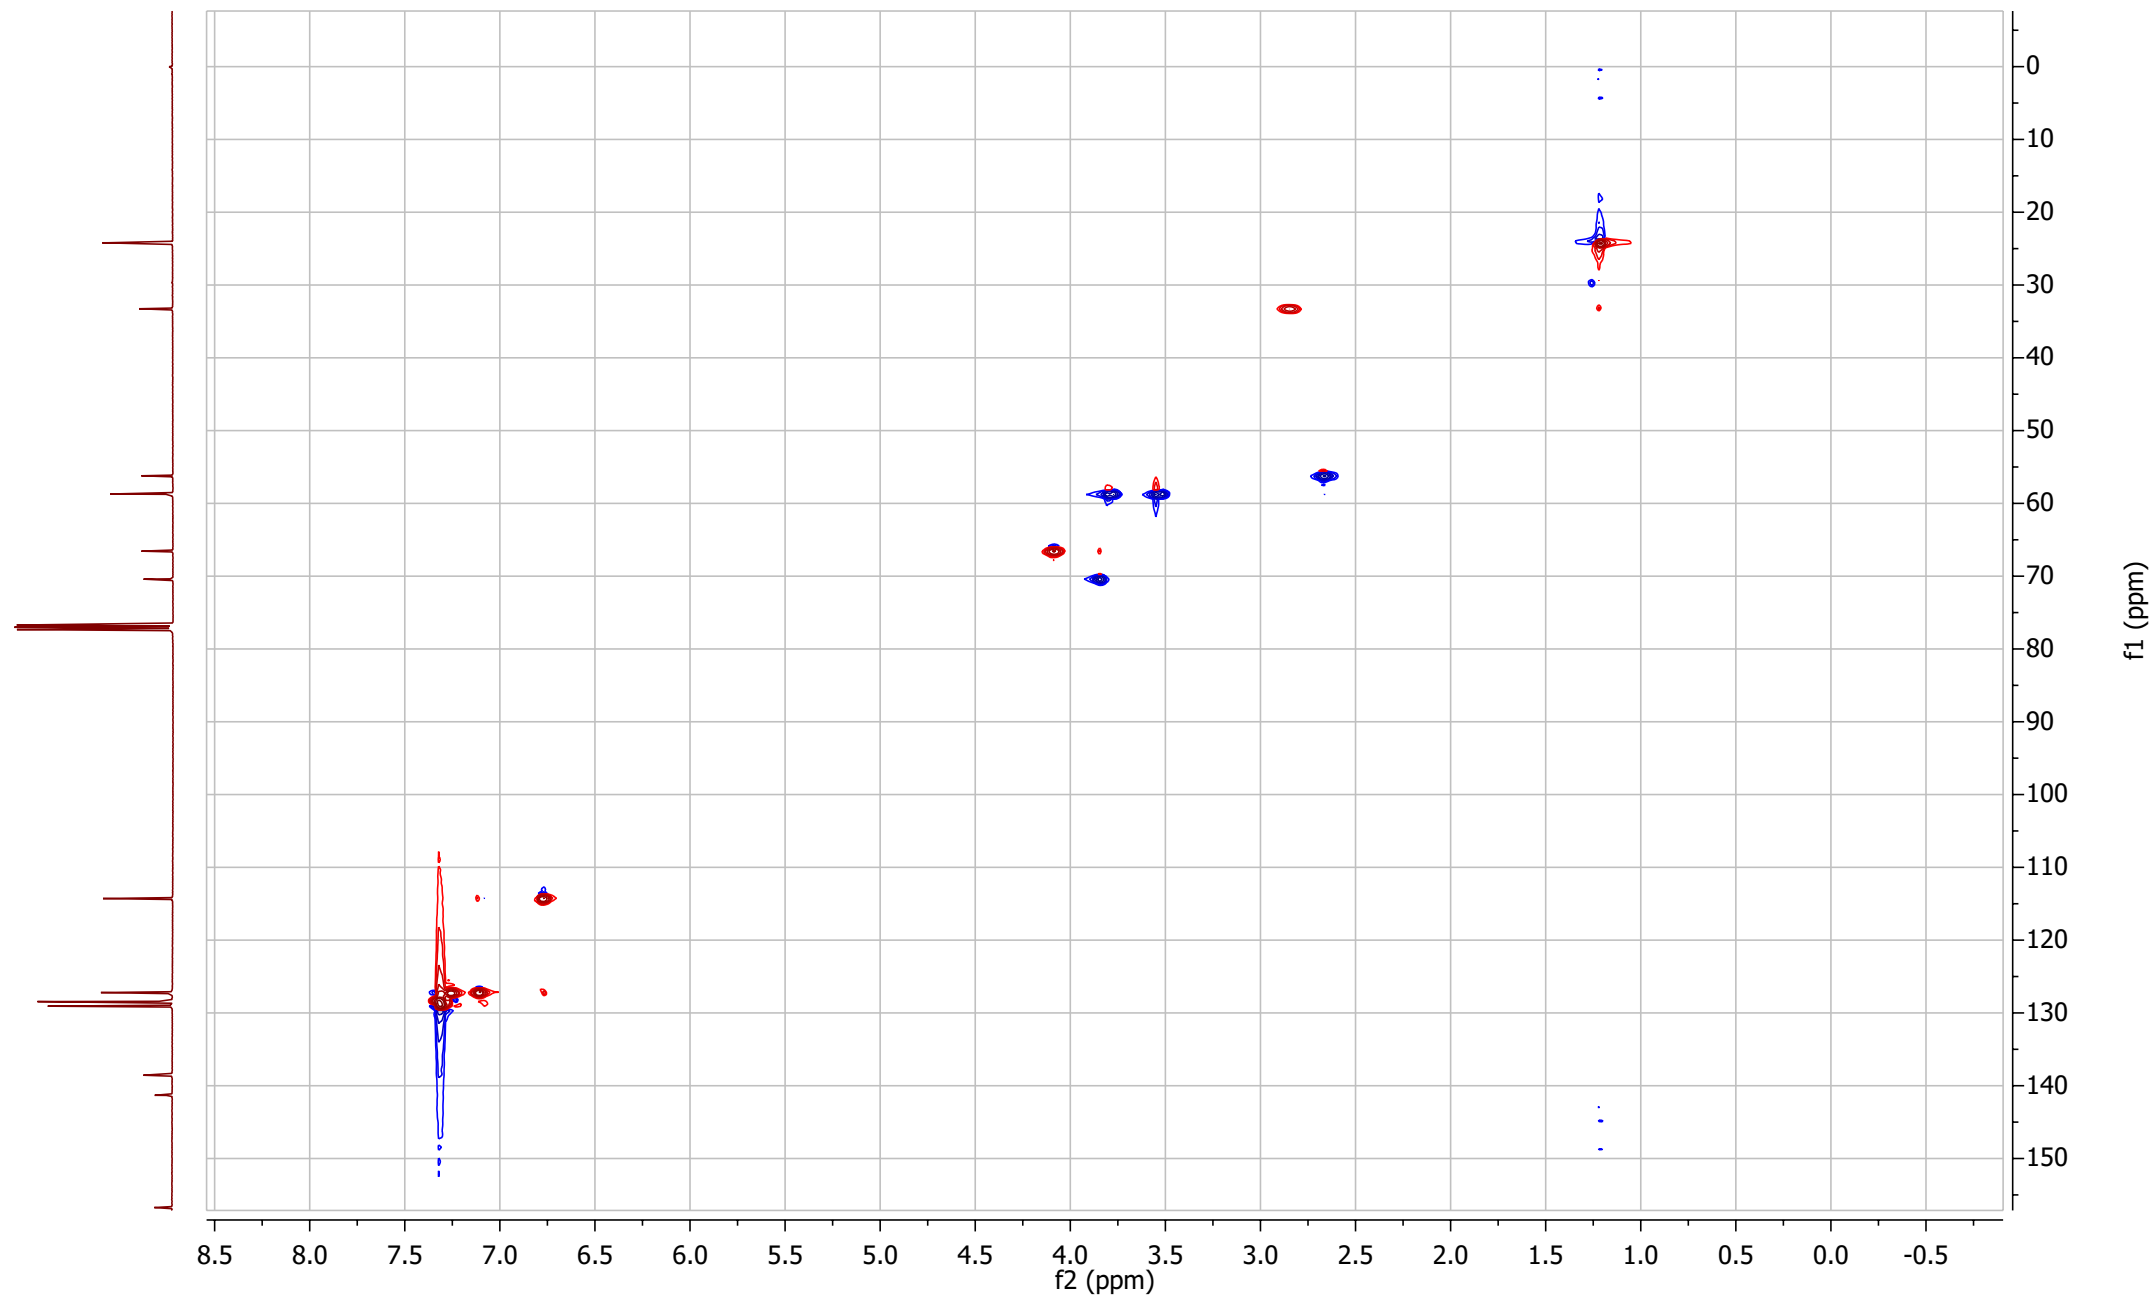

1-(Dibenzylamino)-3-phenoxypropan-2-ol

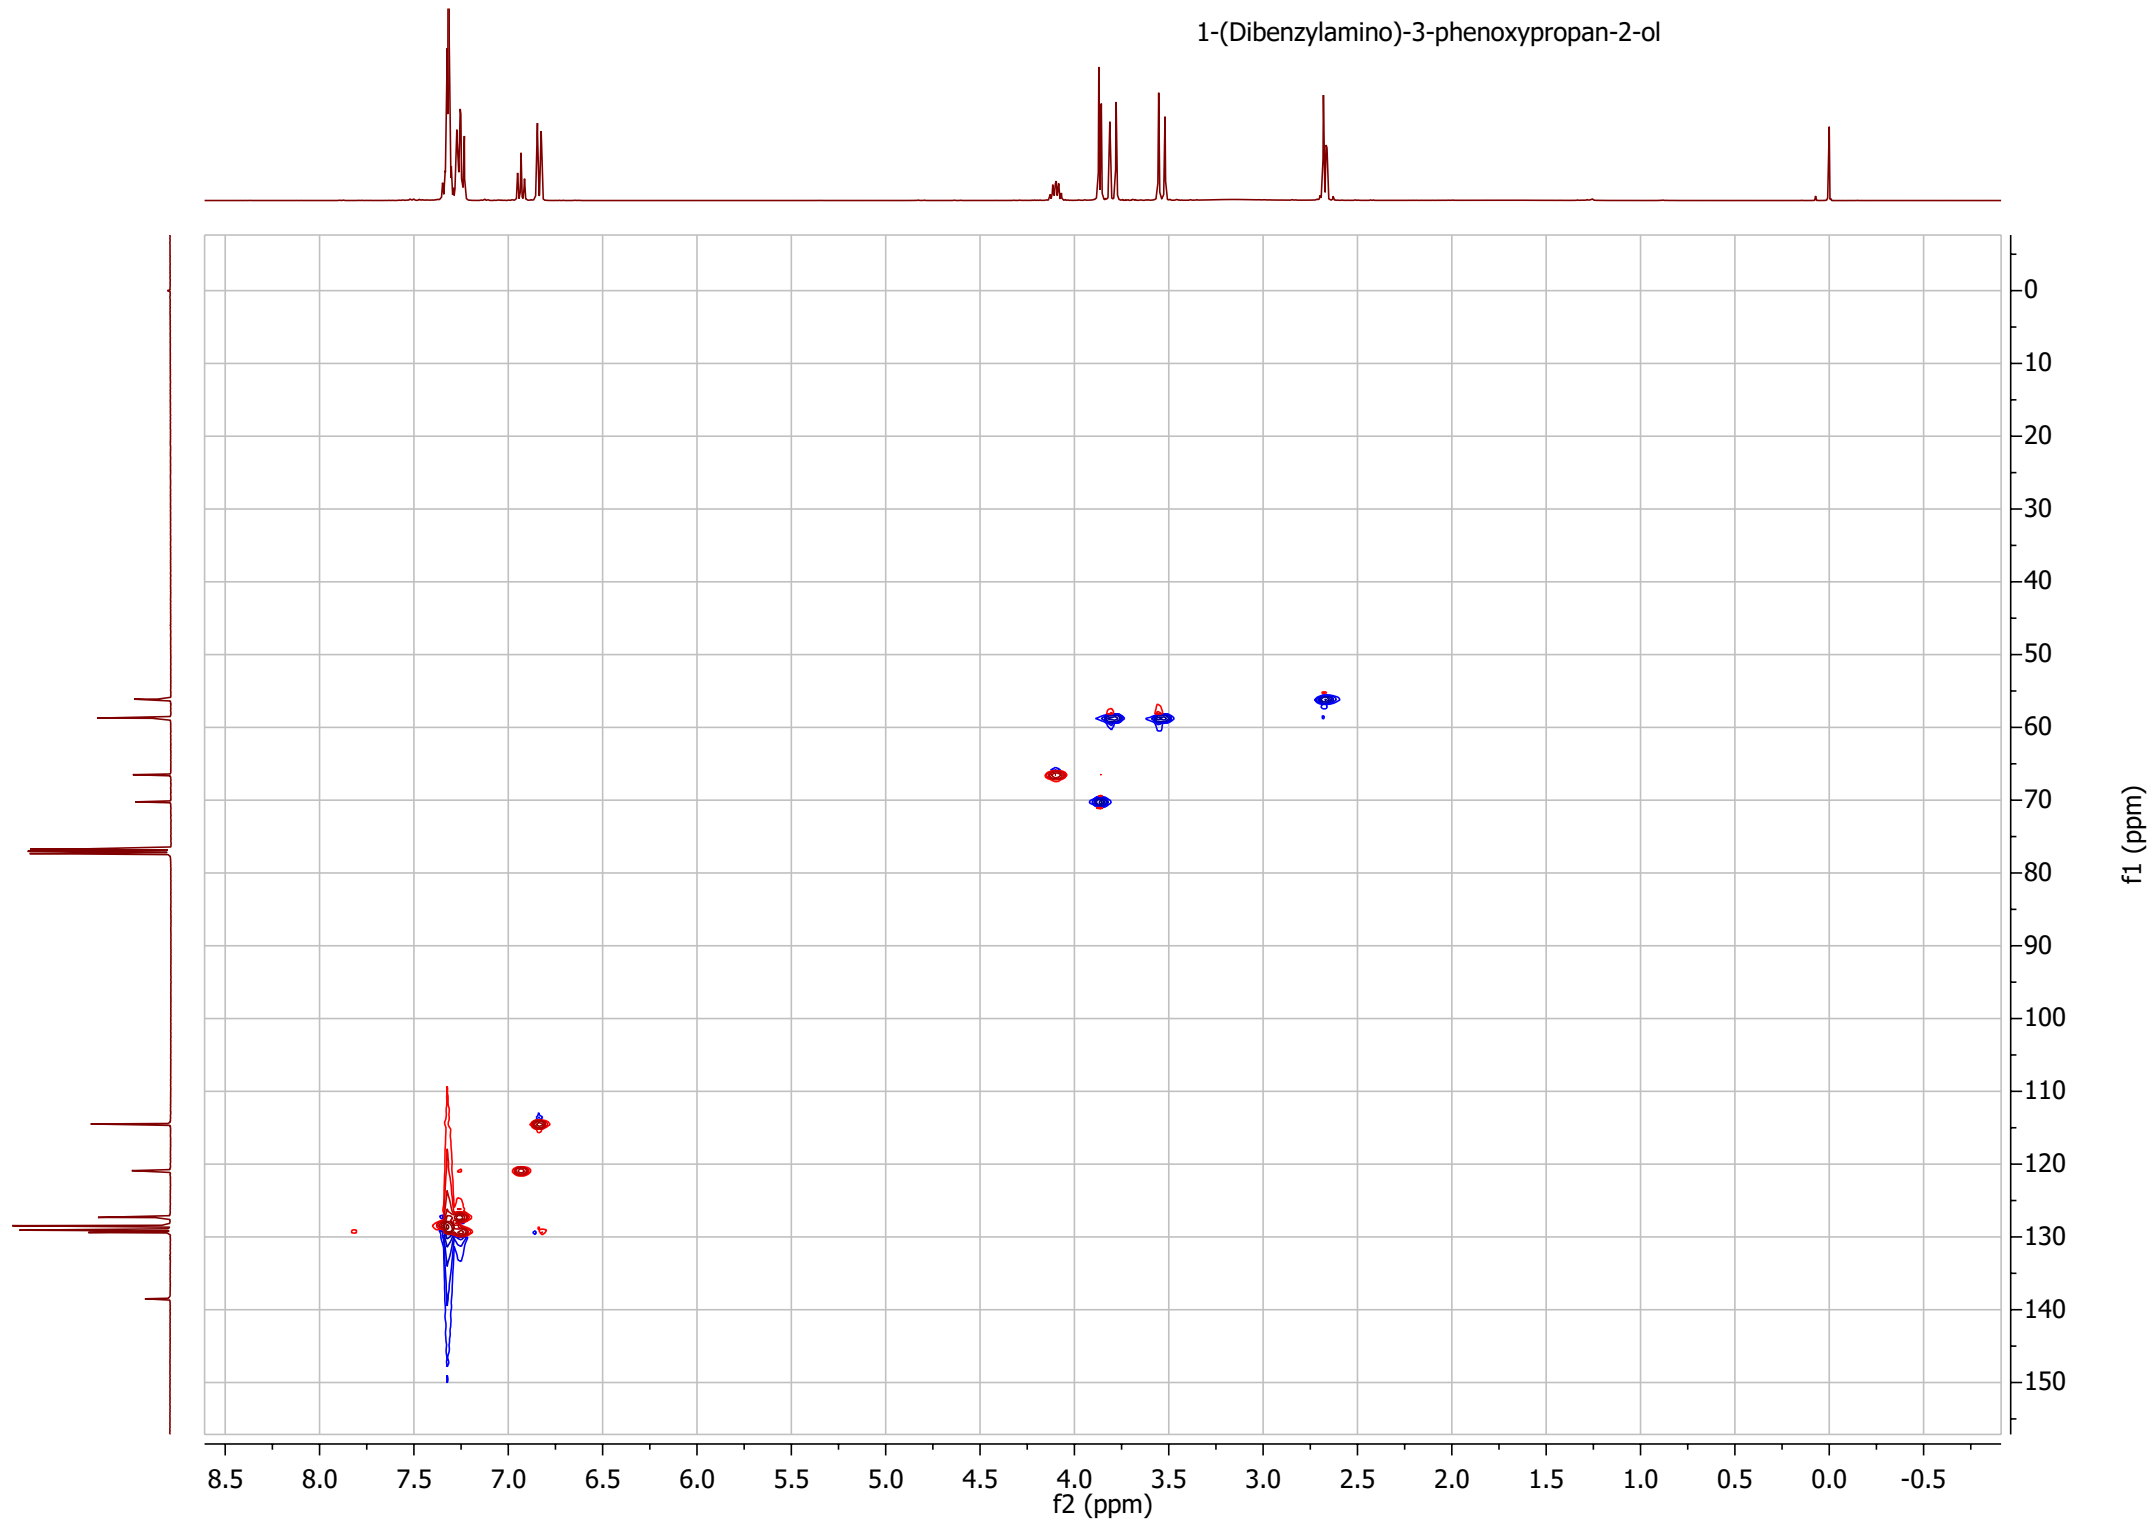

1-(Dibenzylamino)-3-(3,4-dimethylphenoxy)propan-2-ol

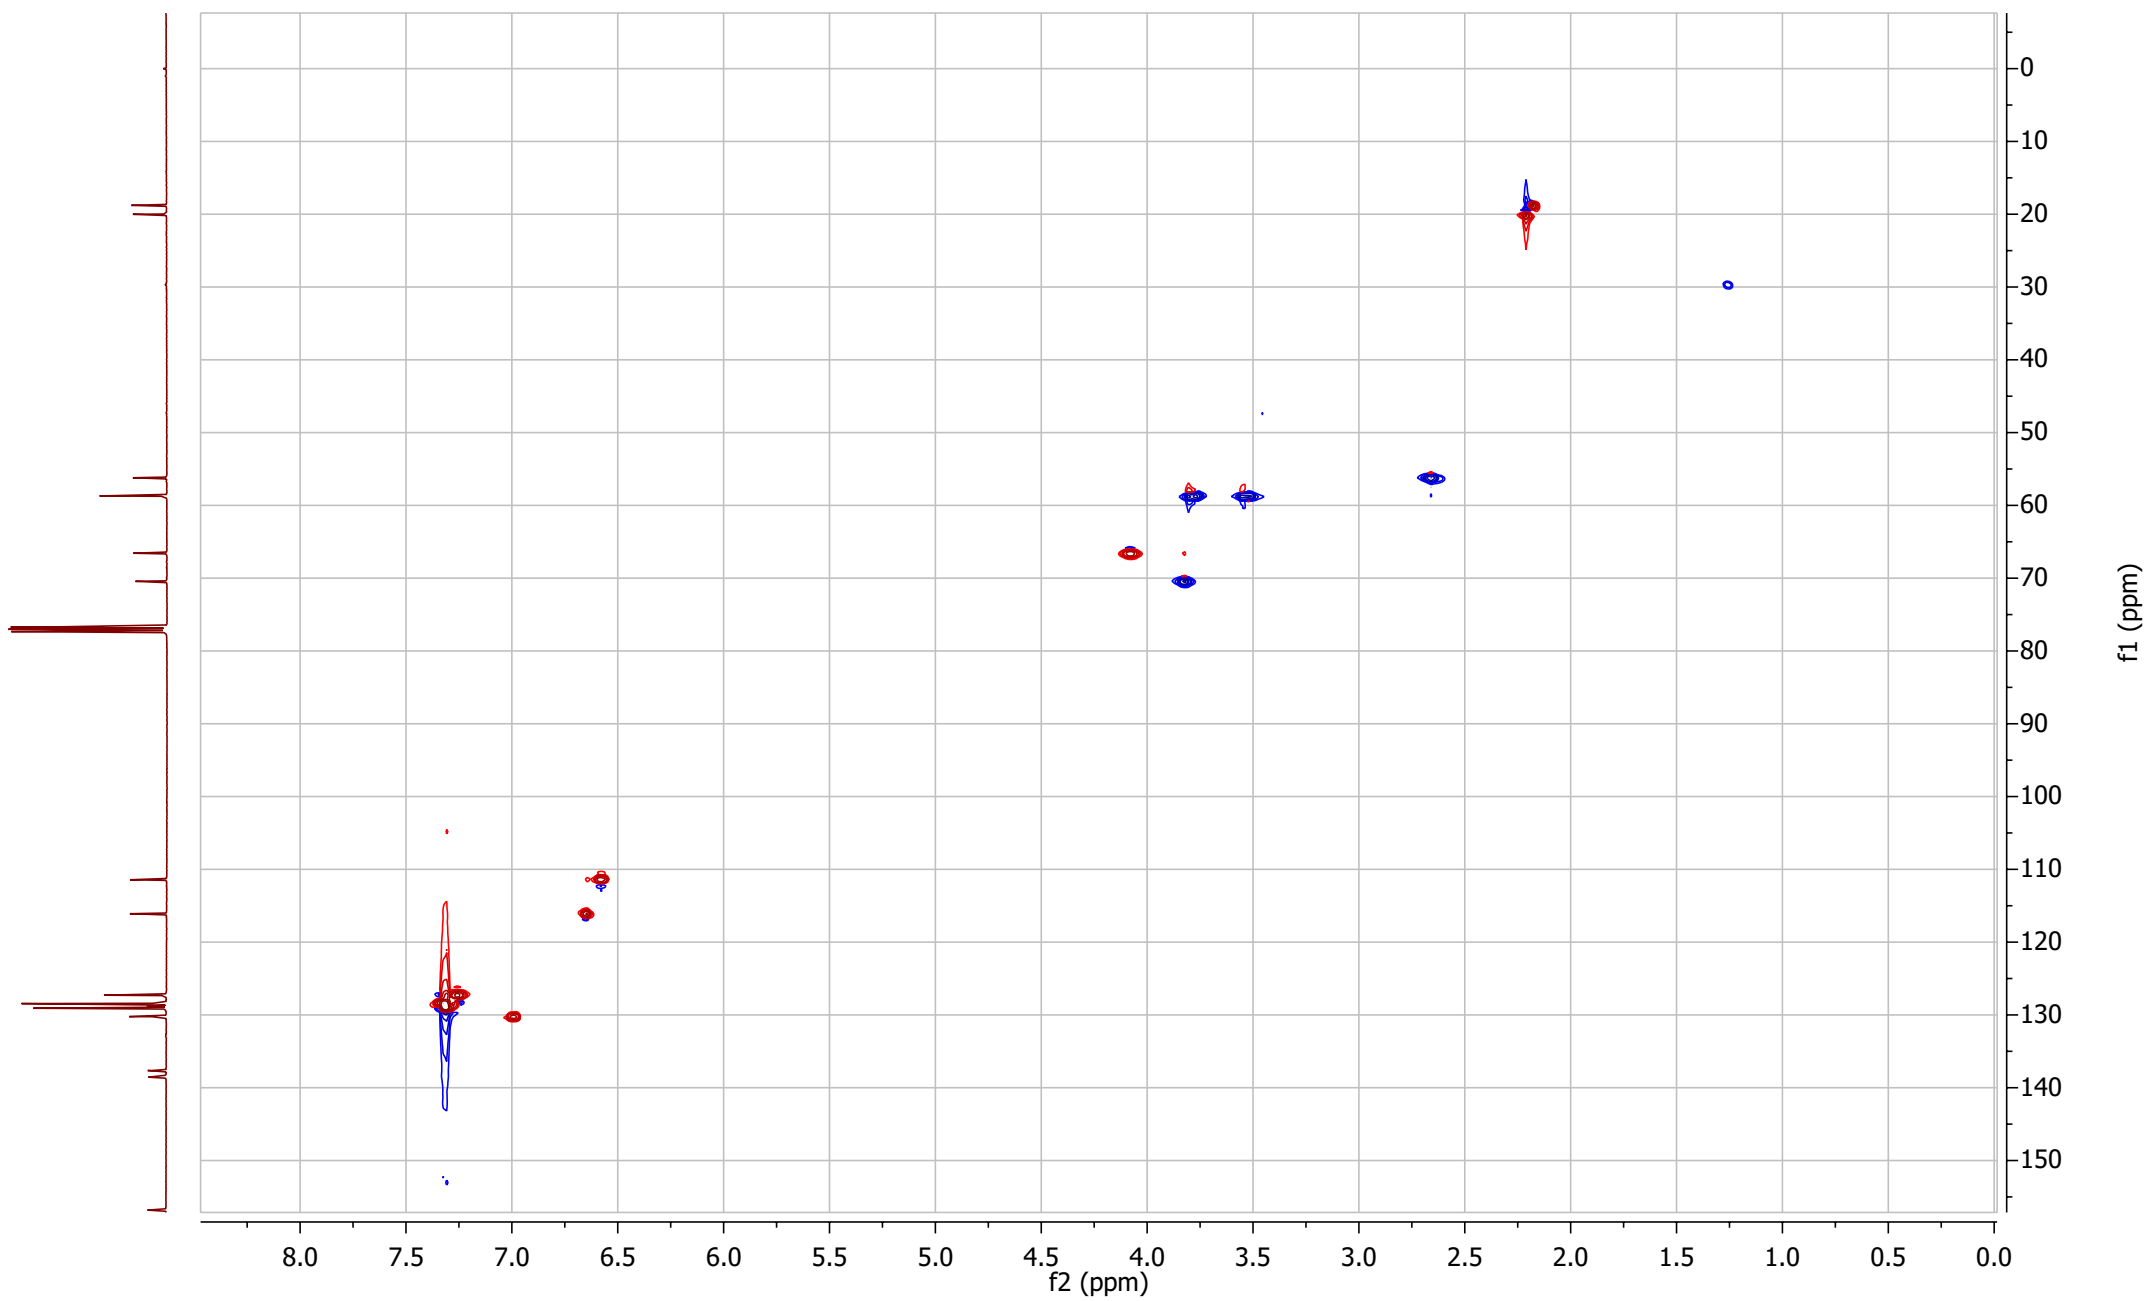



1-(Dibenzylamino)-3-(4-methoxyphenoxy)propan-2-ol

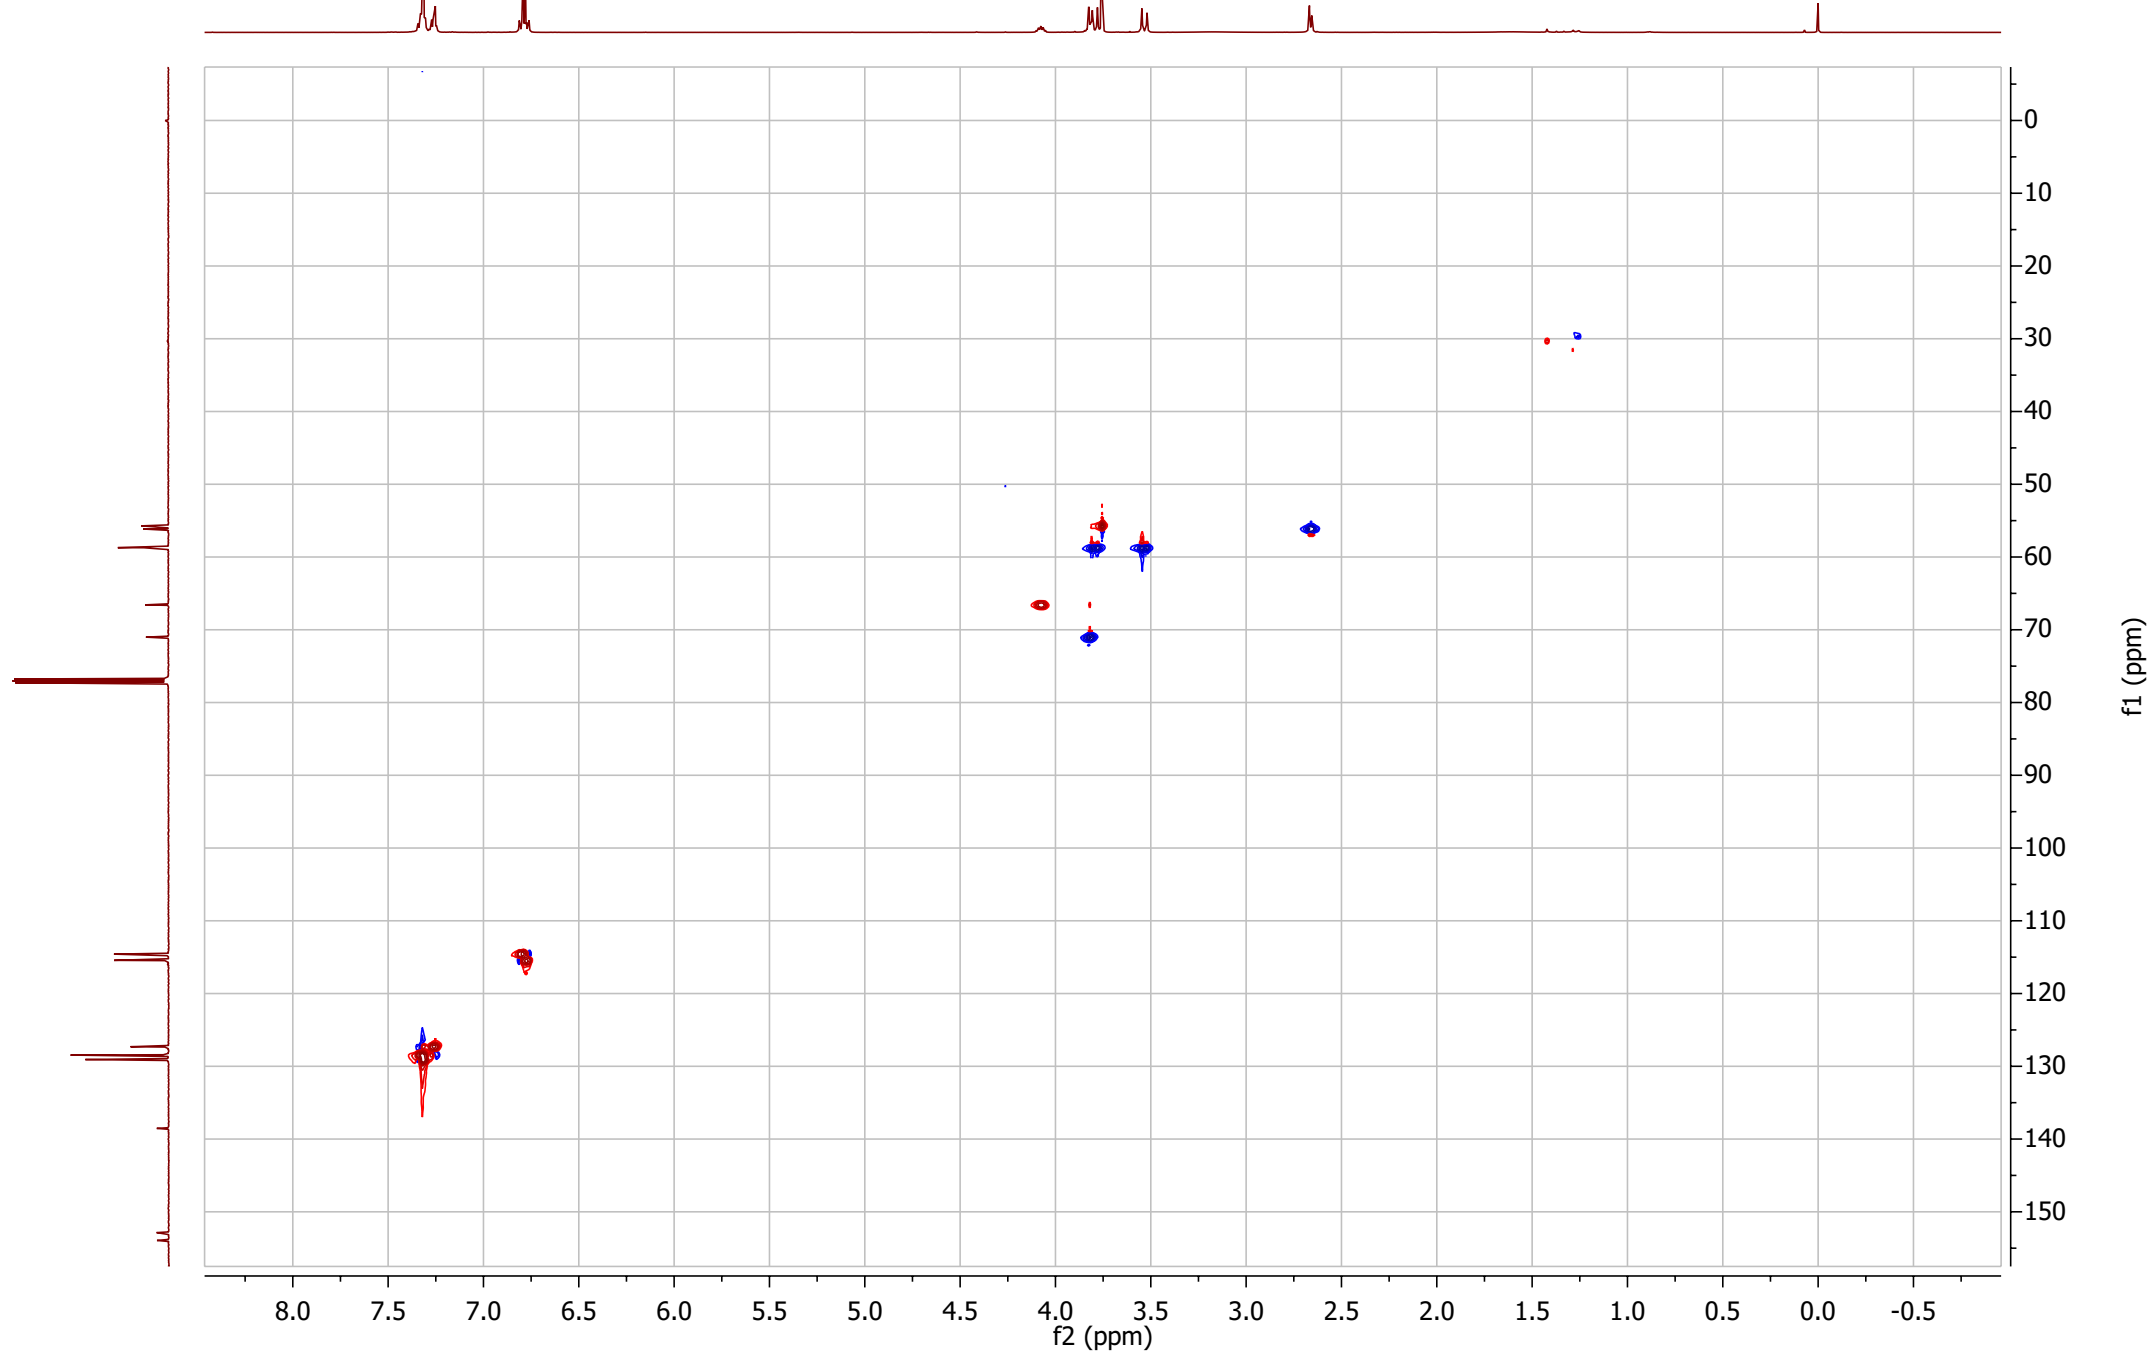

1-(Dibenzylamino)-3-(4-propoxyphenoxy)propan-2-ol

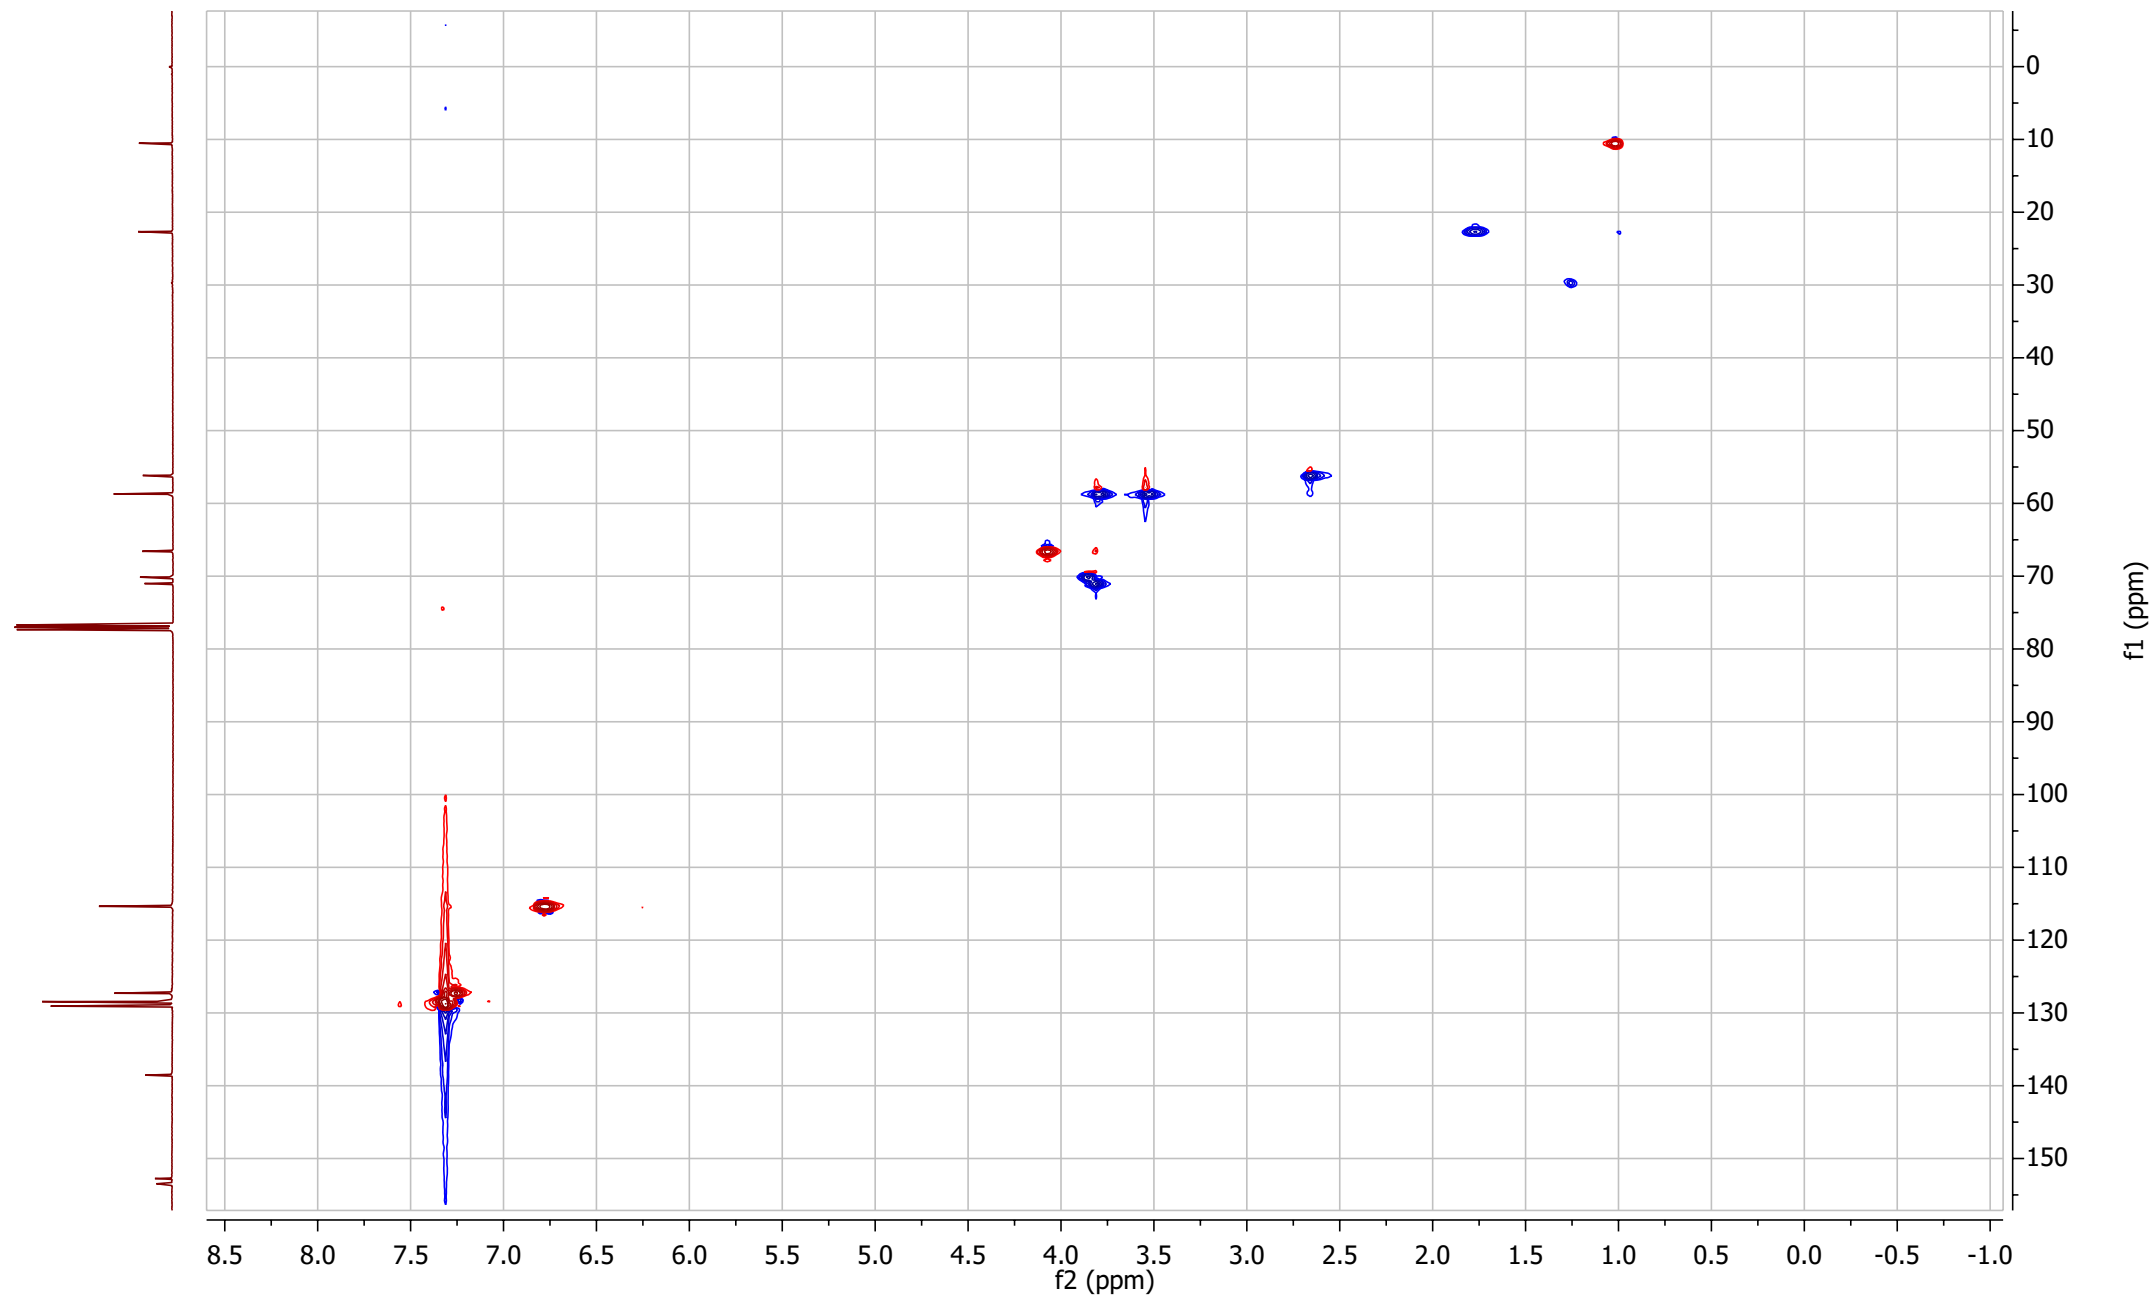

1-(Dibenzylamino)-3-(3,4-dichlorophenoxy)propan-2-ol

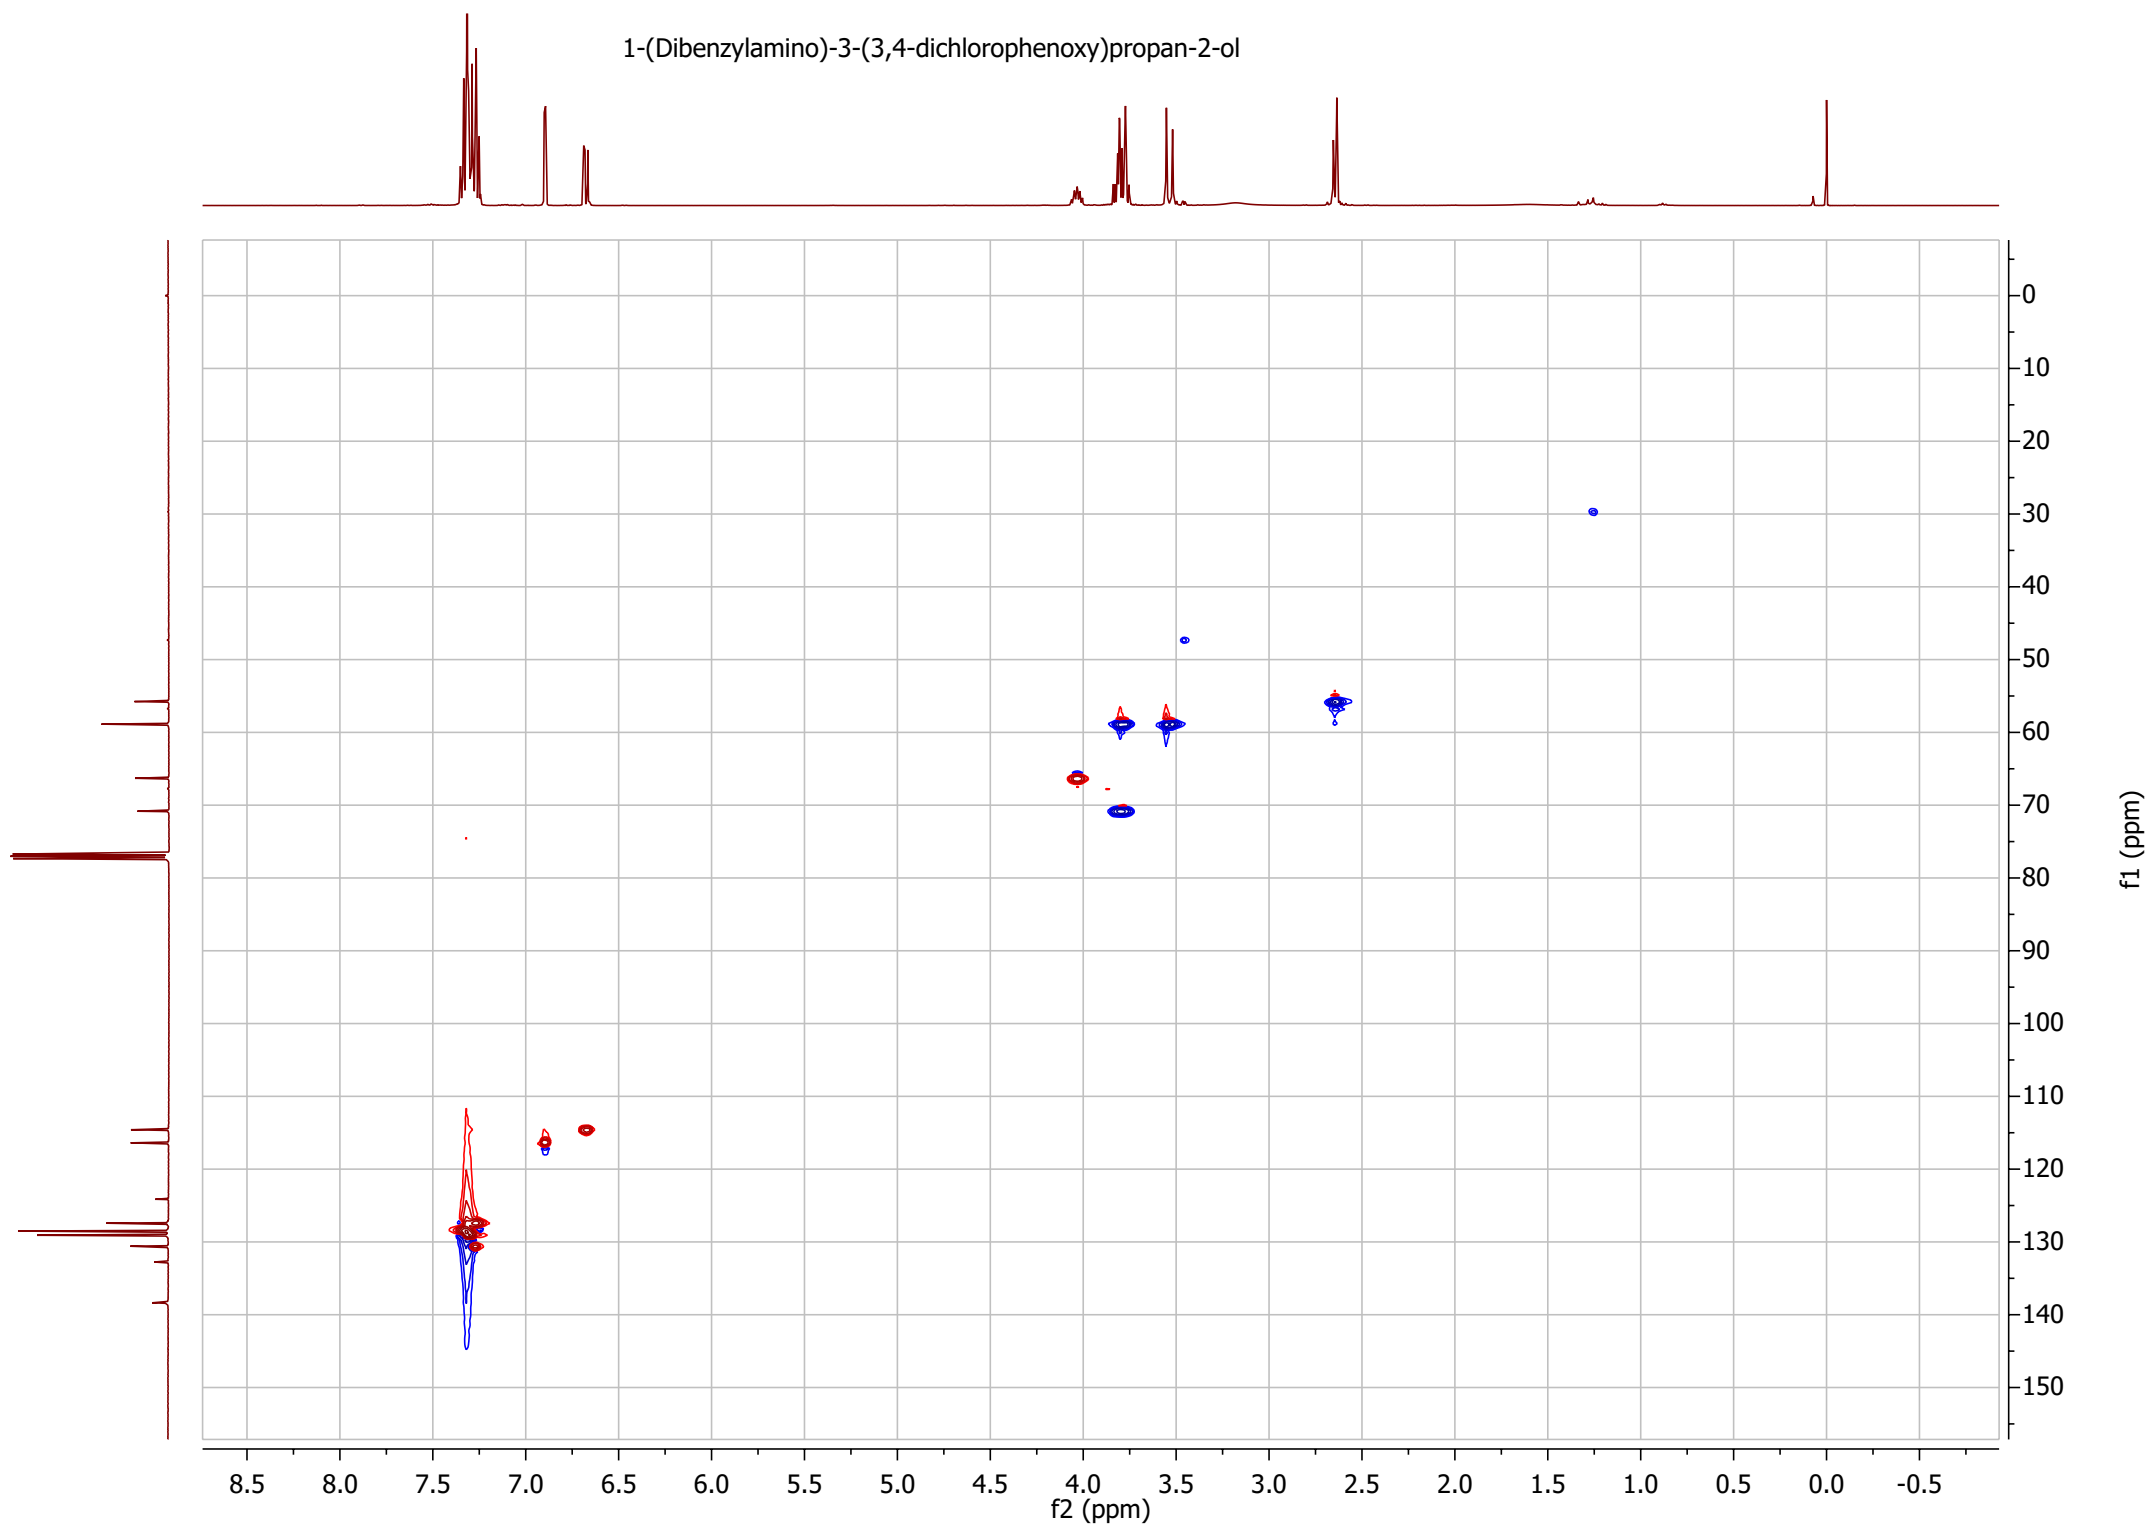

1-[4-Chloro-3-(trifluoromethyl)phenoxy]-3-(dibenzylamino)propan-2-ol

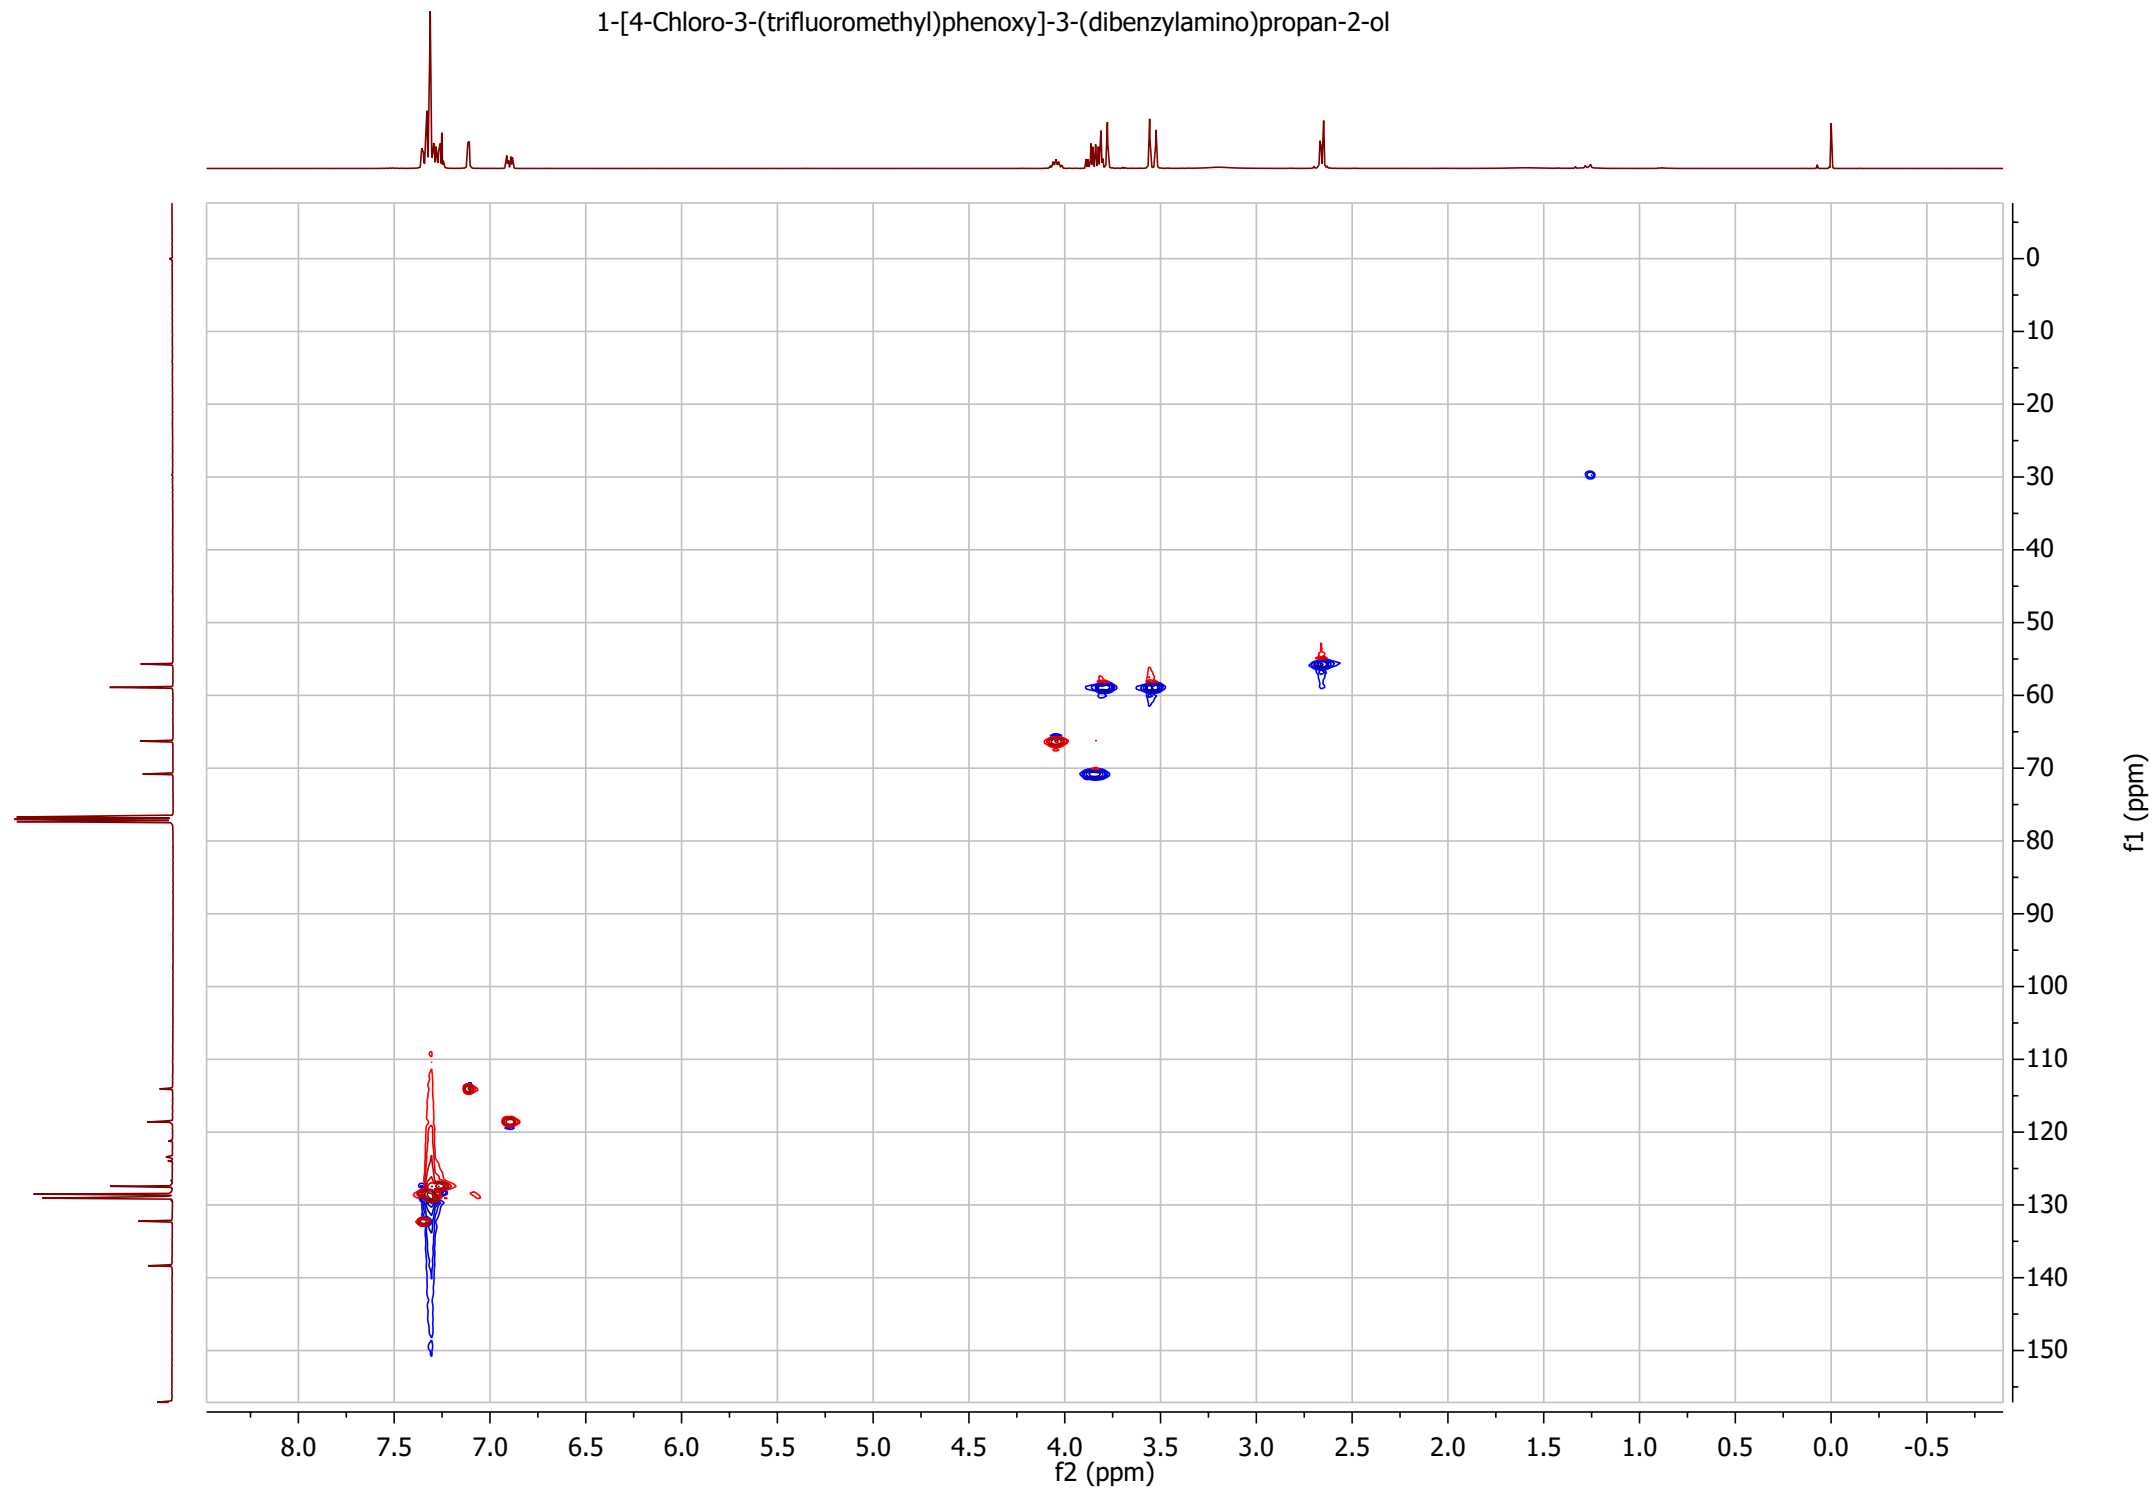

1-(Dibenzylamino)-3-[4-nitro-3-(trifluoromethyl)phenoxy]propan-2-ol

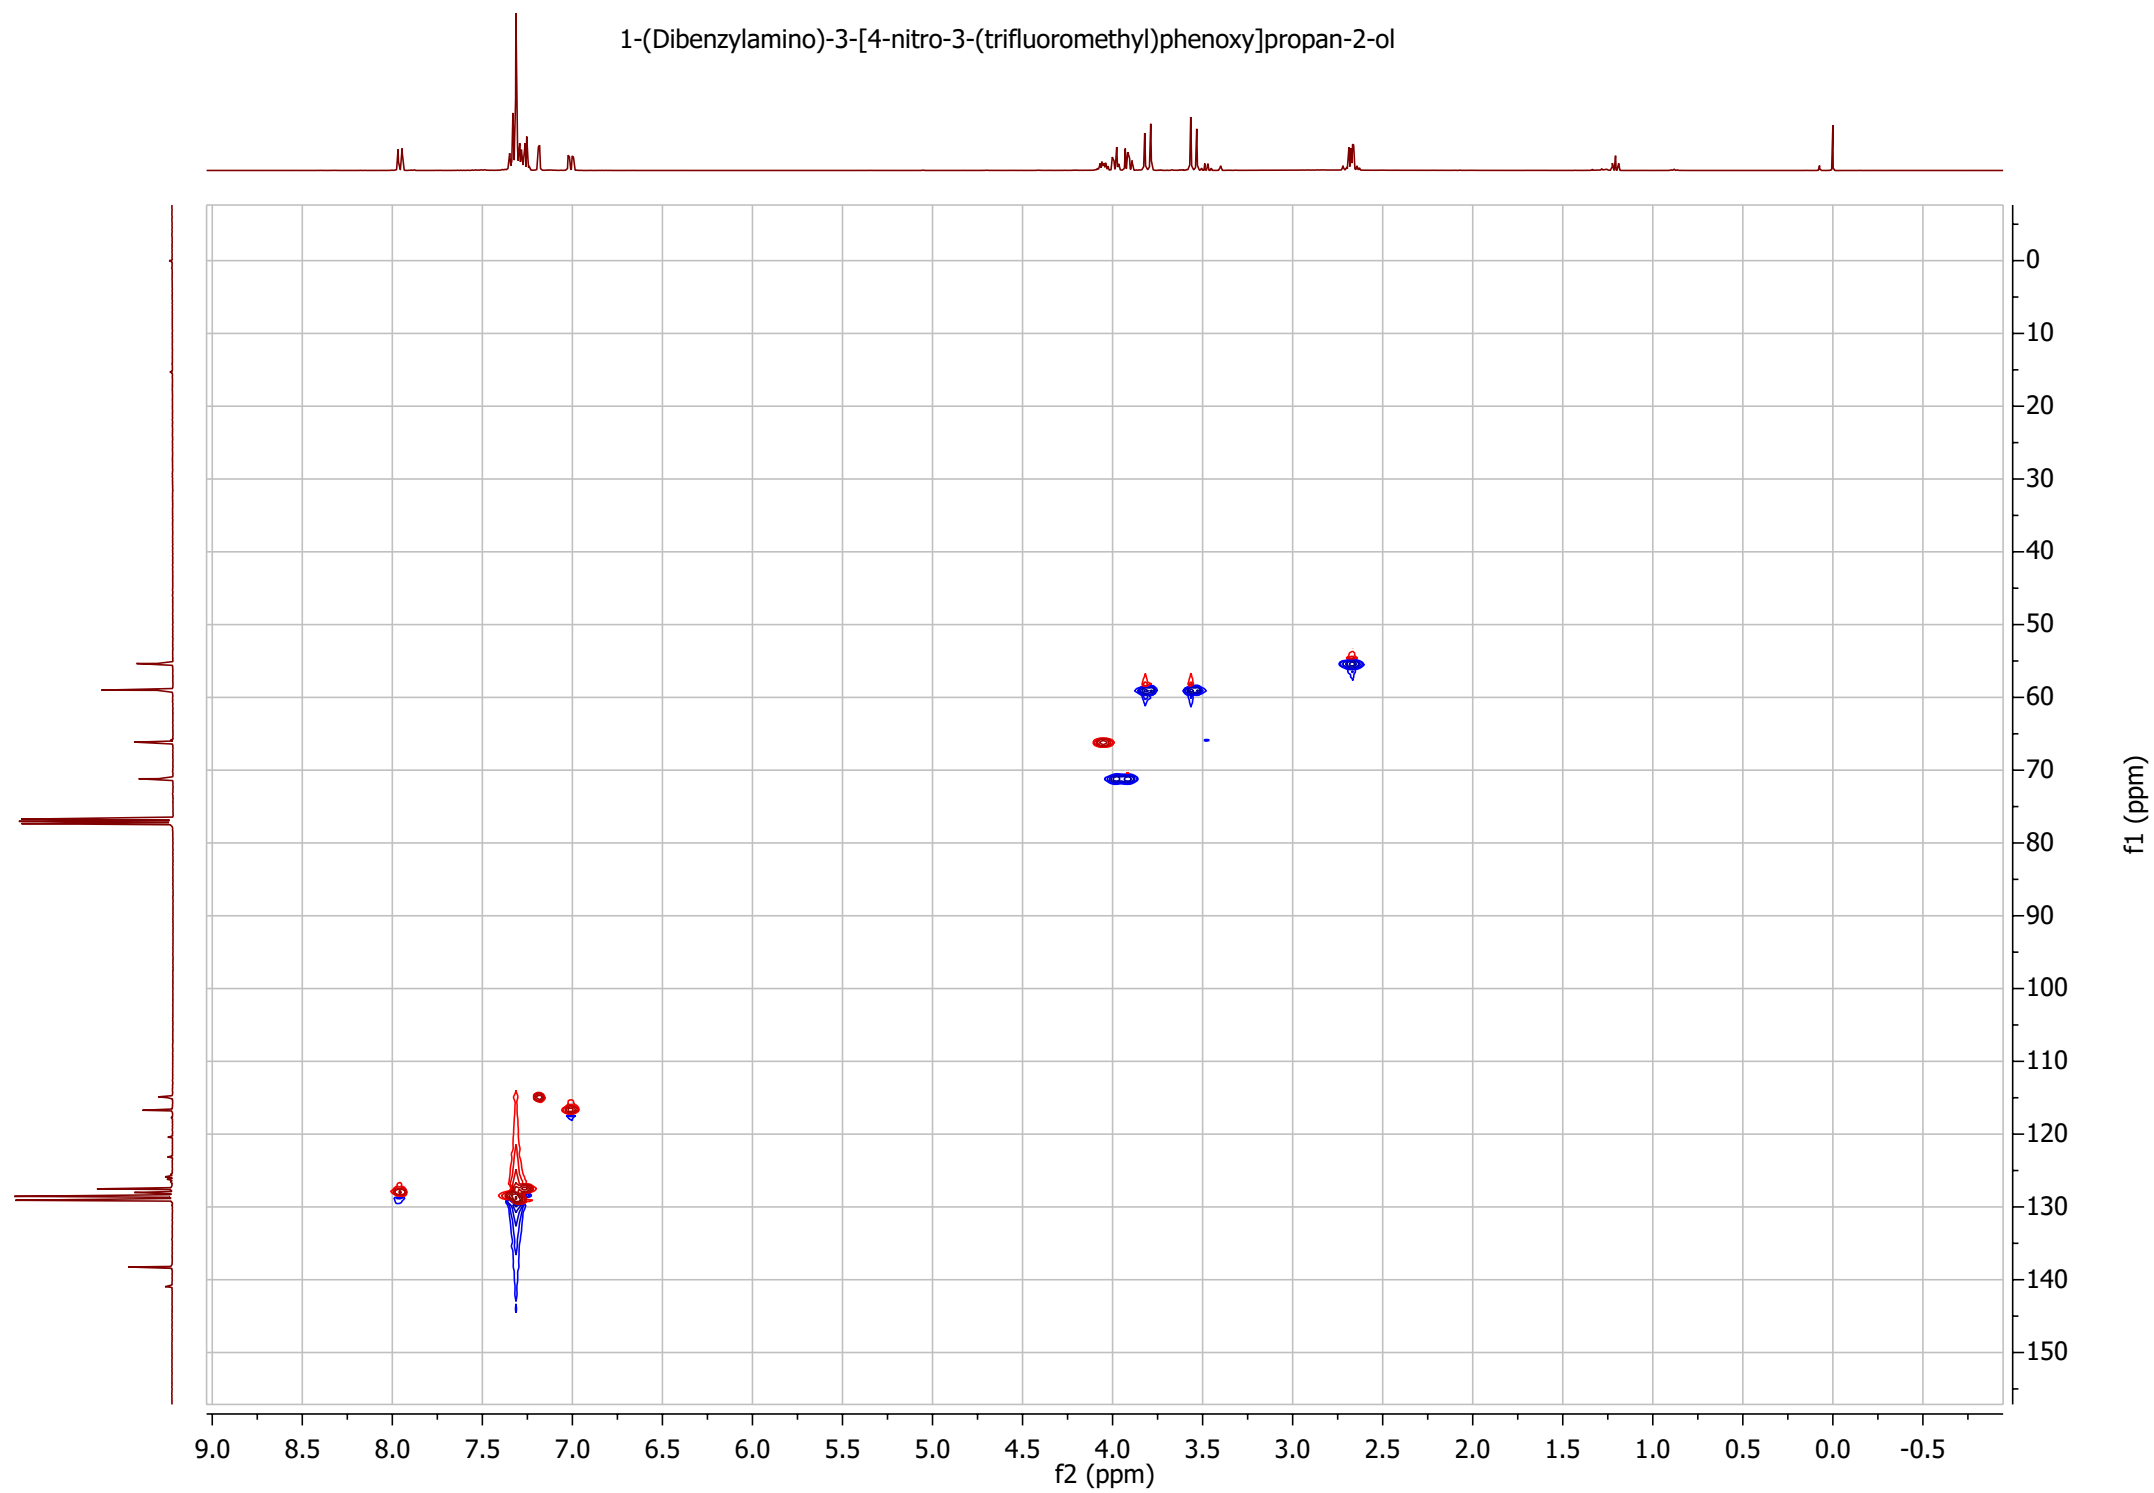

1-[Benzyl(pyridin-3-ylmethyl)amino]-3-[4-(trifluoromethyl)phenoxy]propan-2-ol

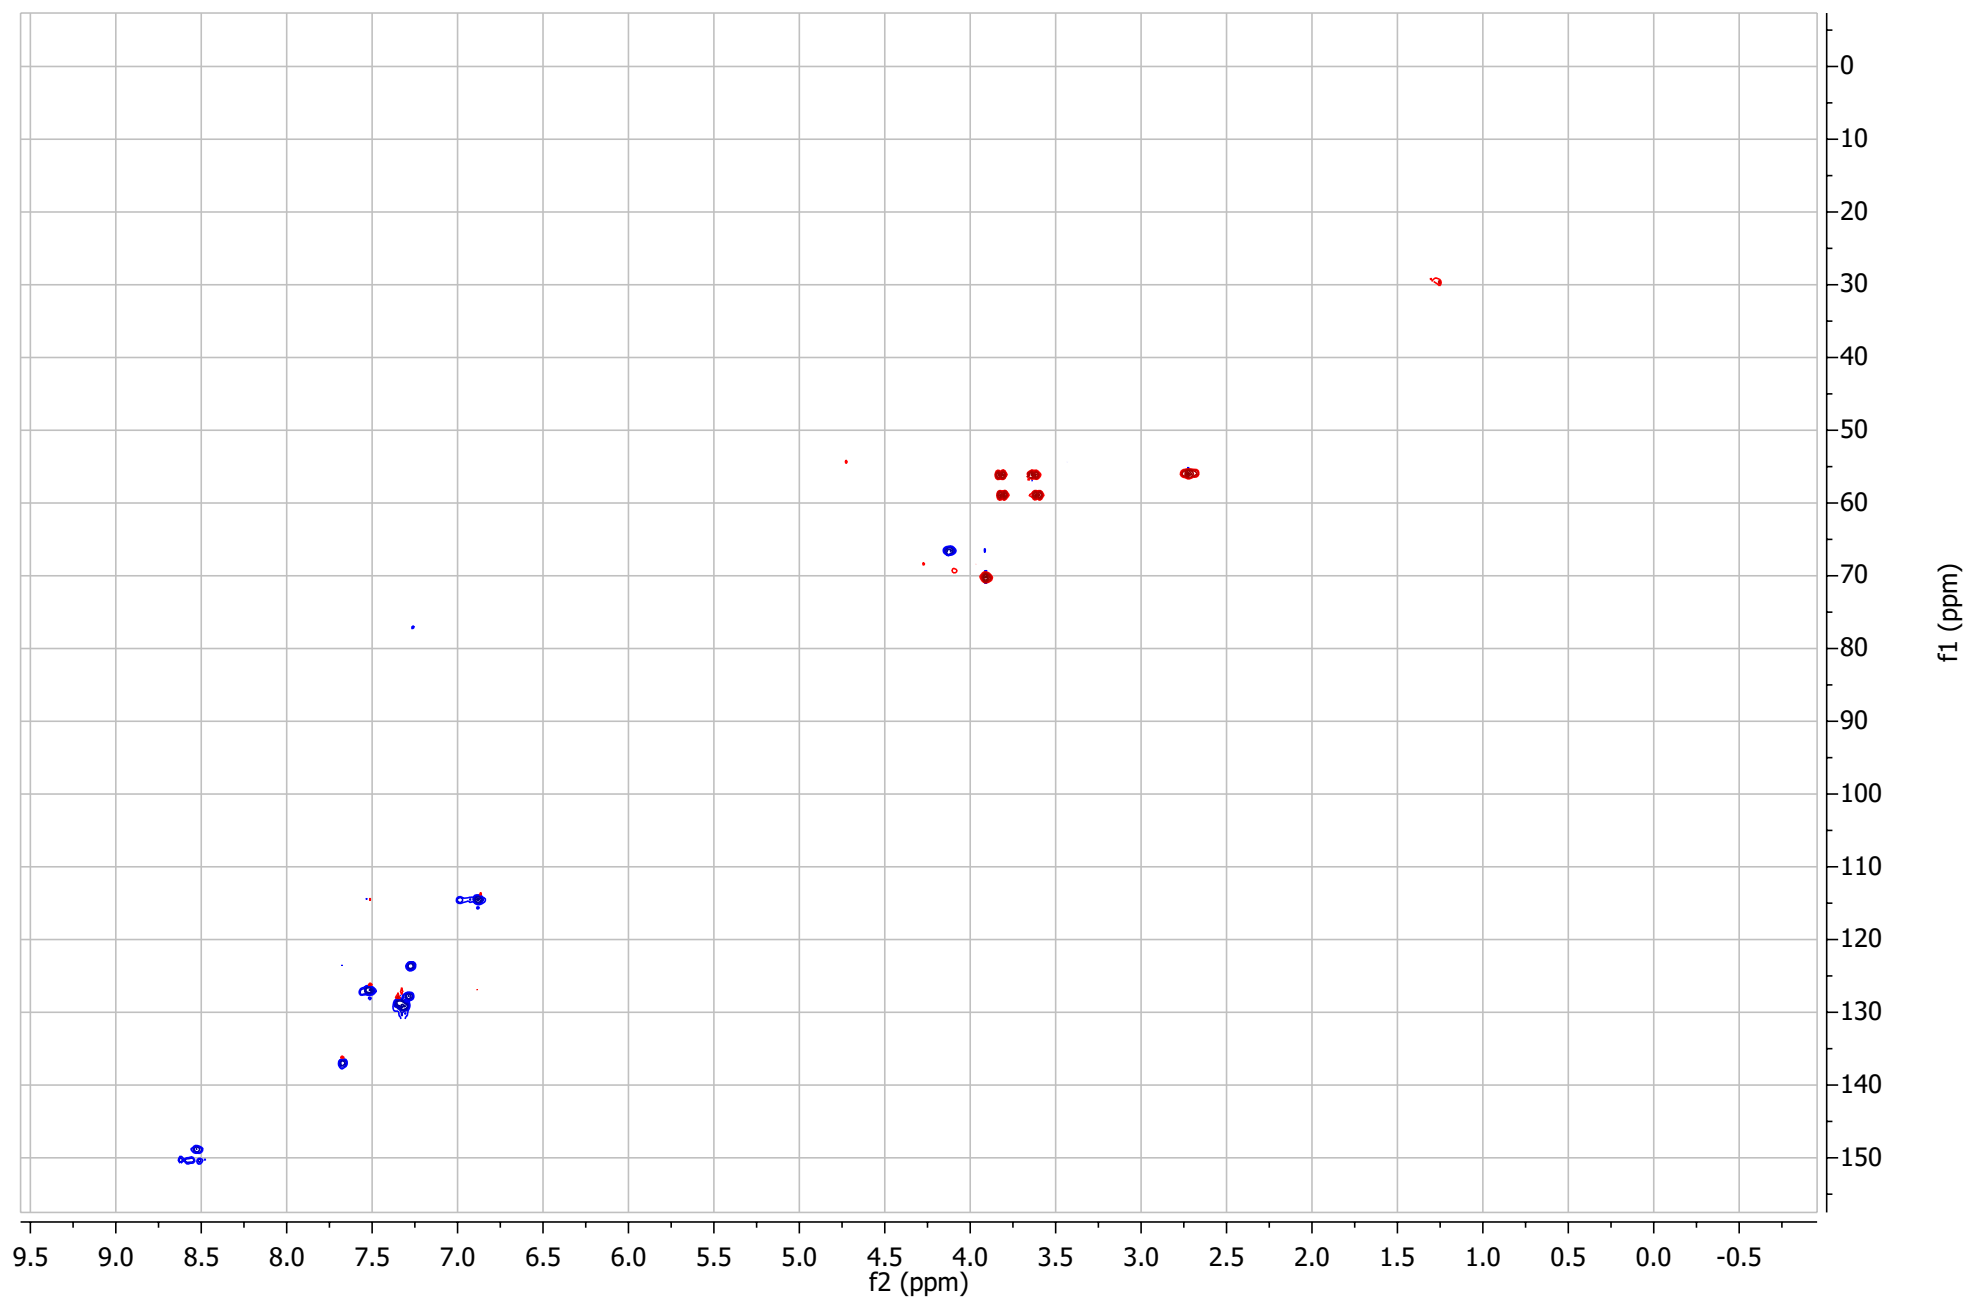

1-[Benzyl(phenyl)amino]-3-[4-(trifluoromethyl)phenoxy]propan-2-ol

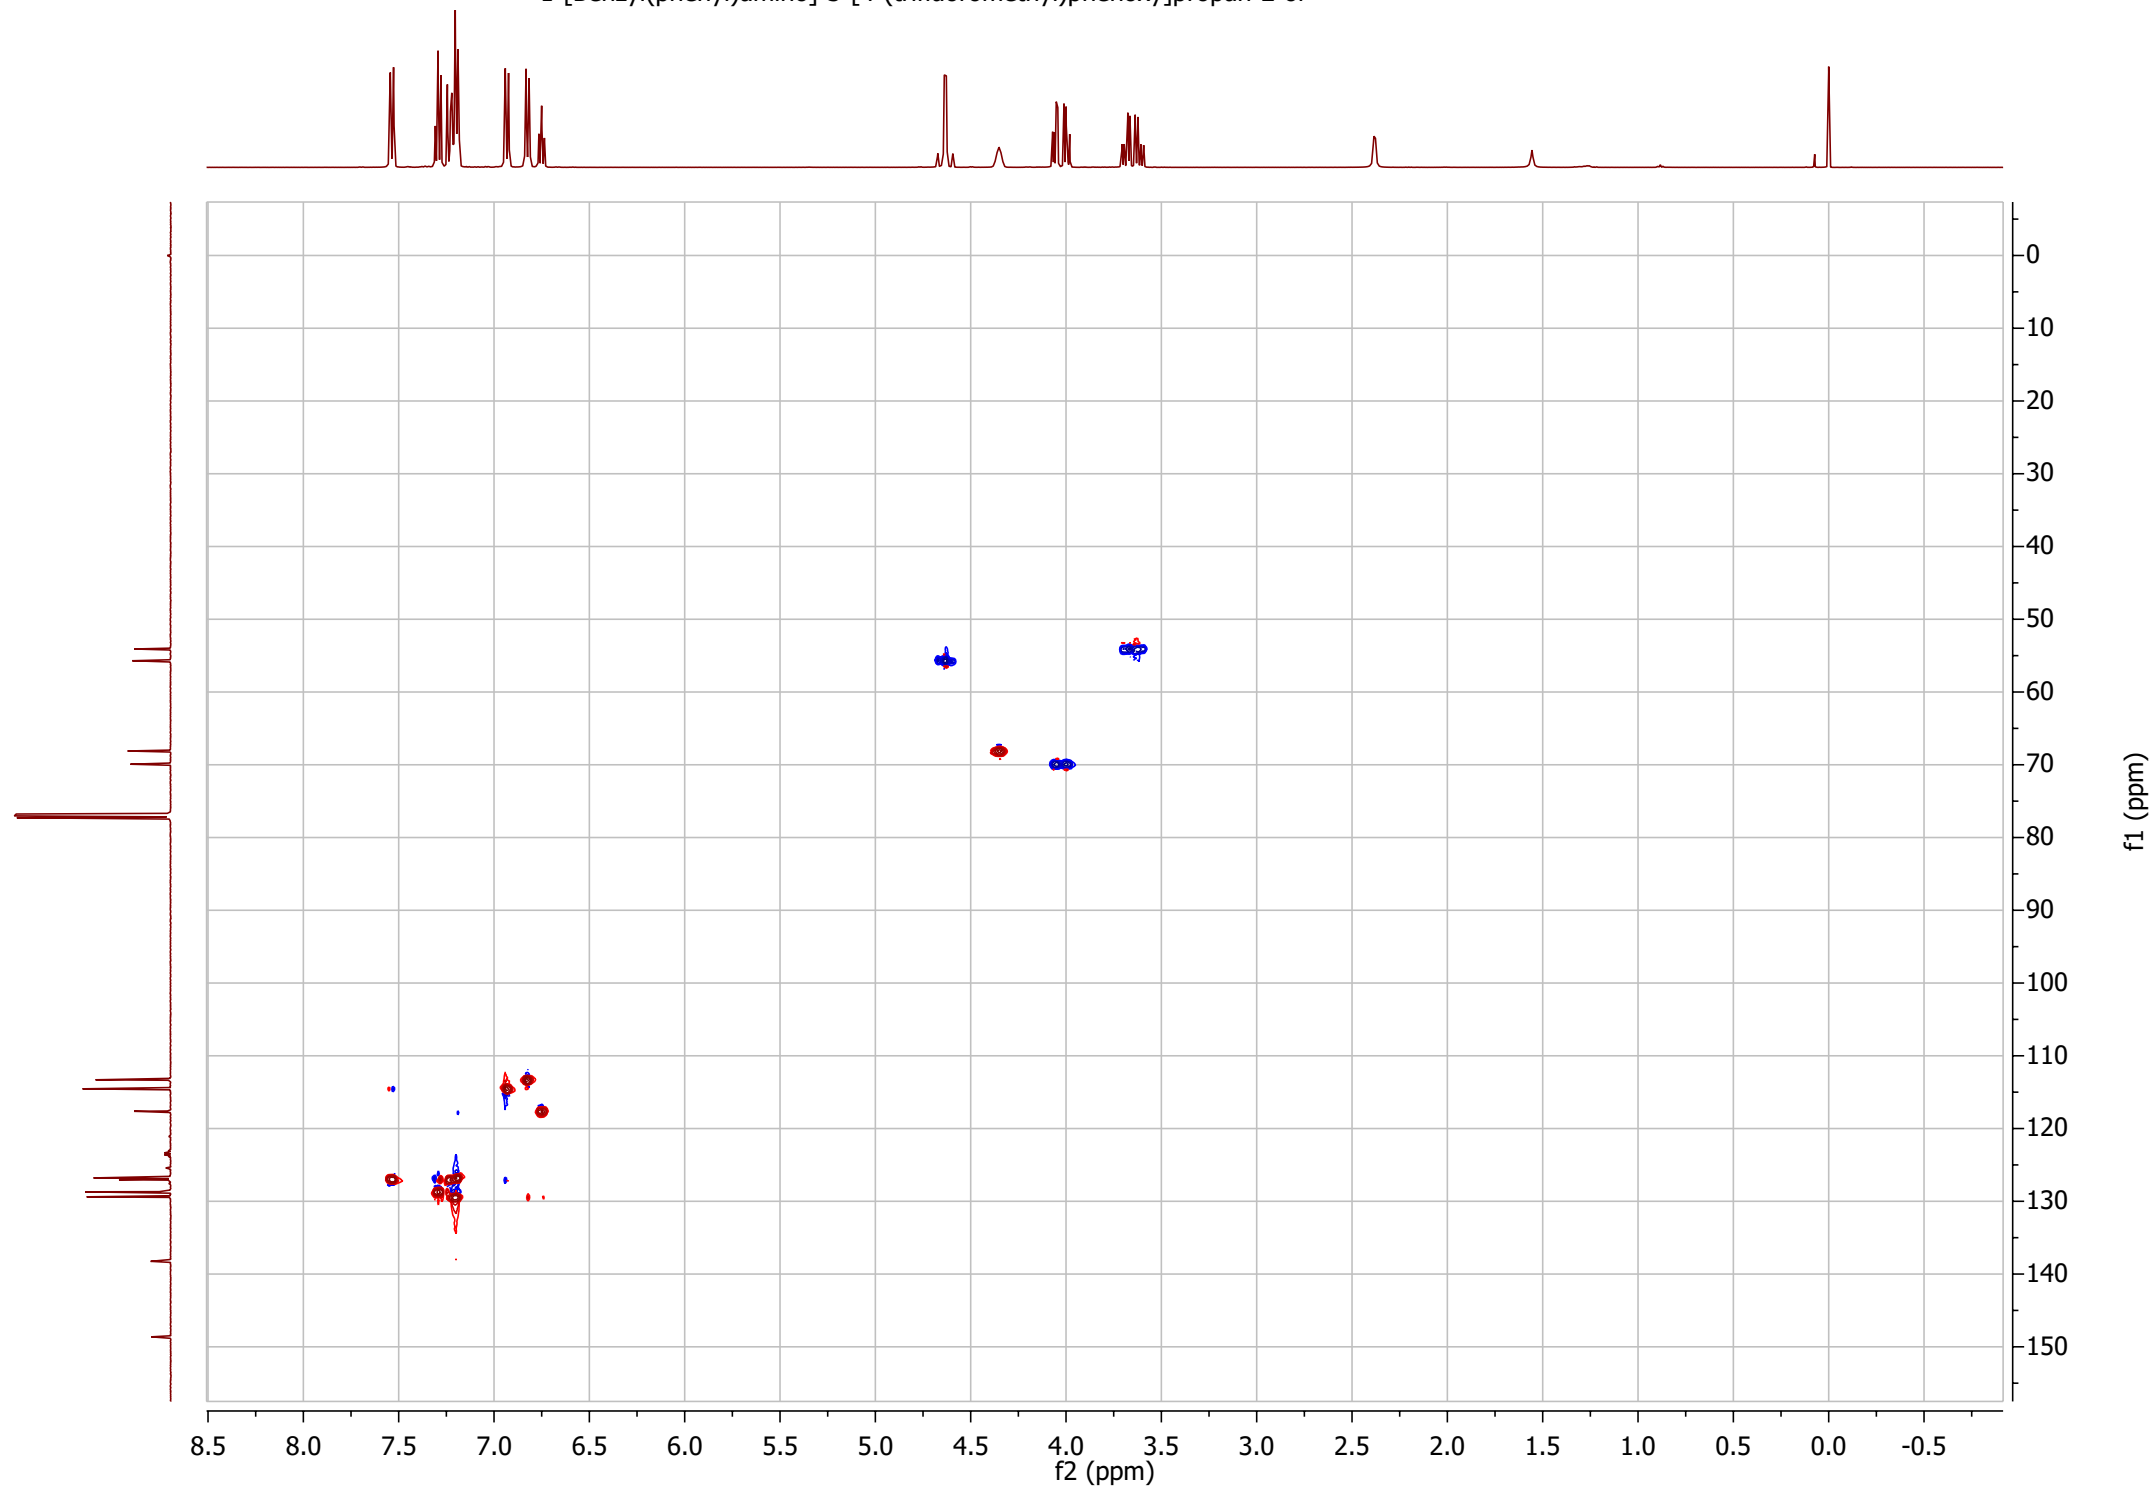

1-(Benzylamino)-3-[4-(trifluoromethyl)phenoxy]propan-2-ol

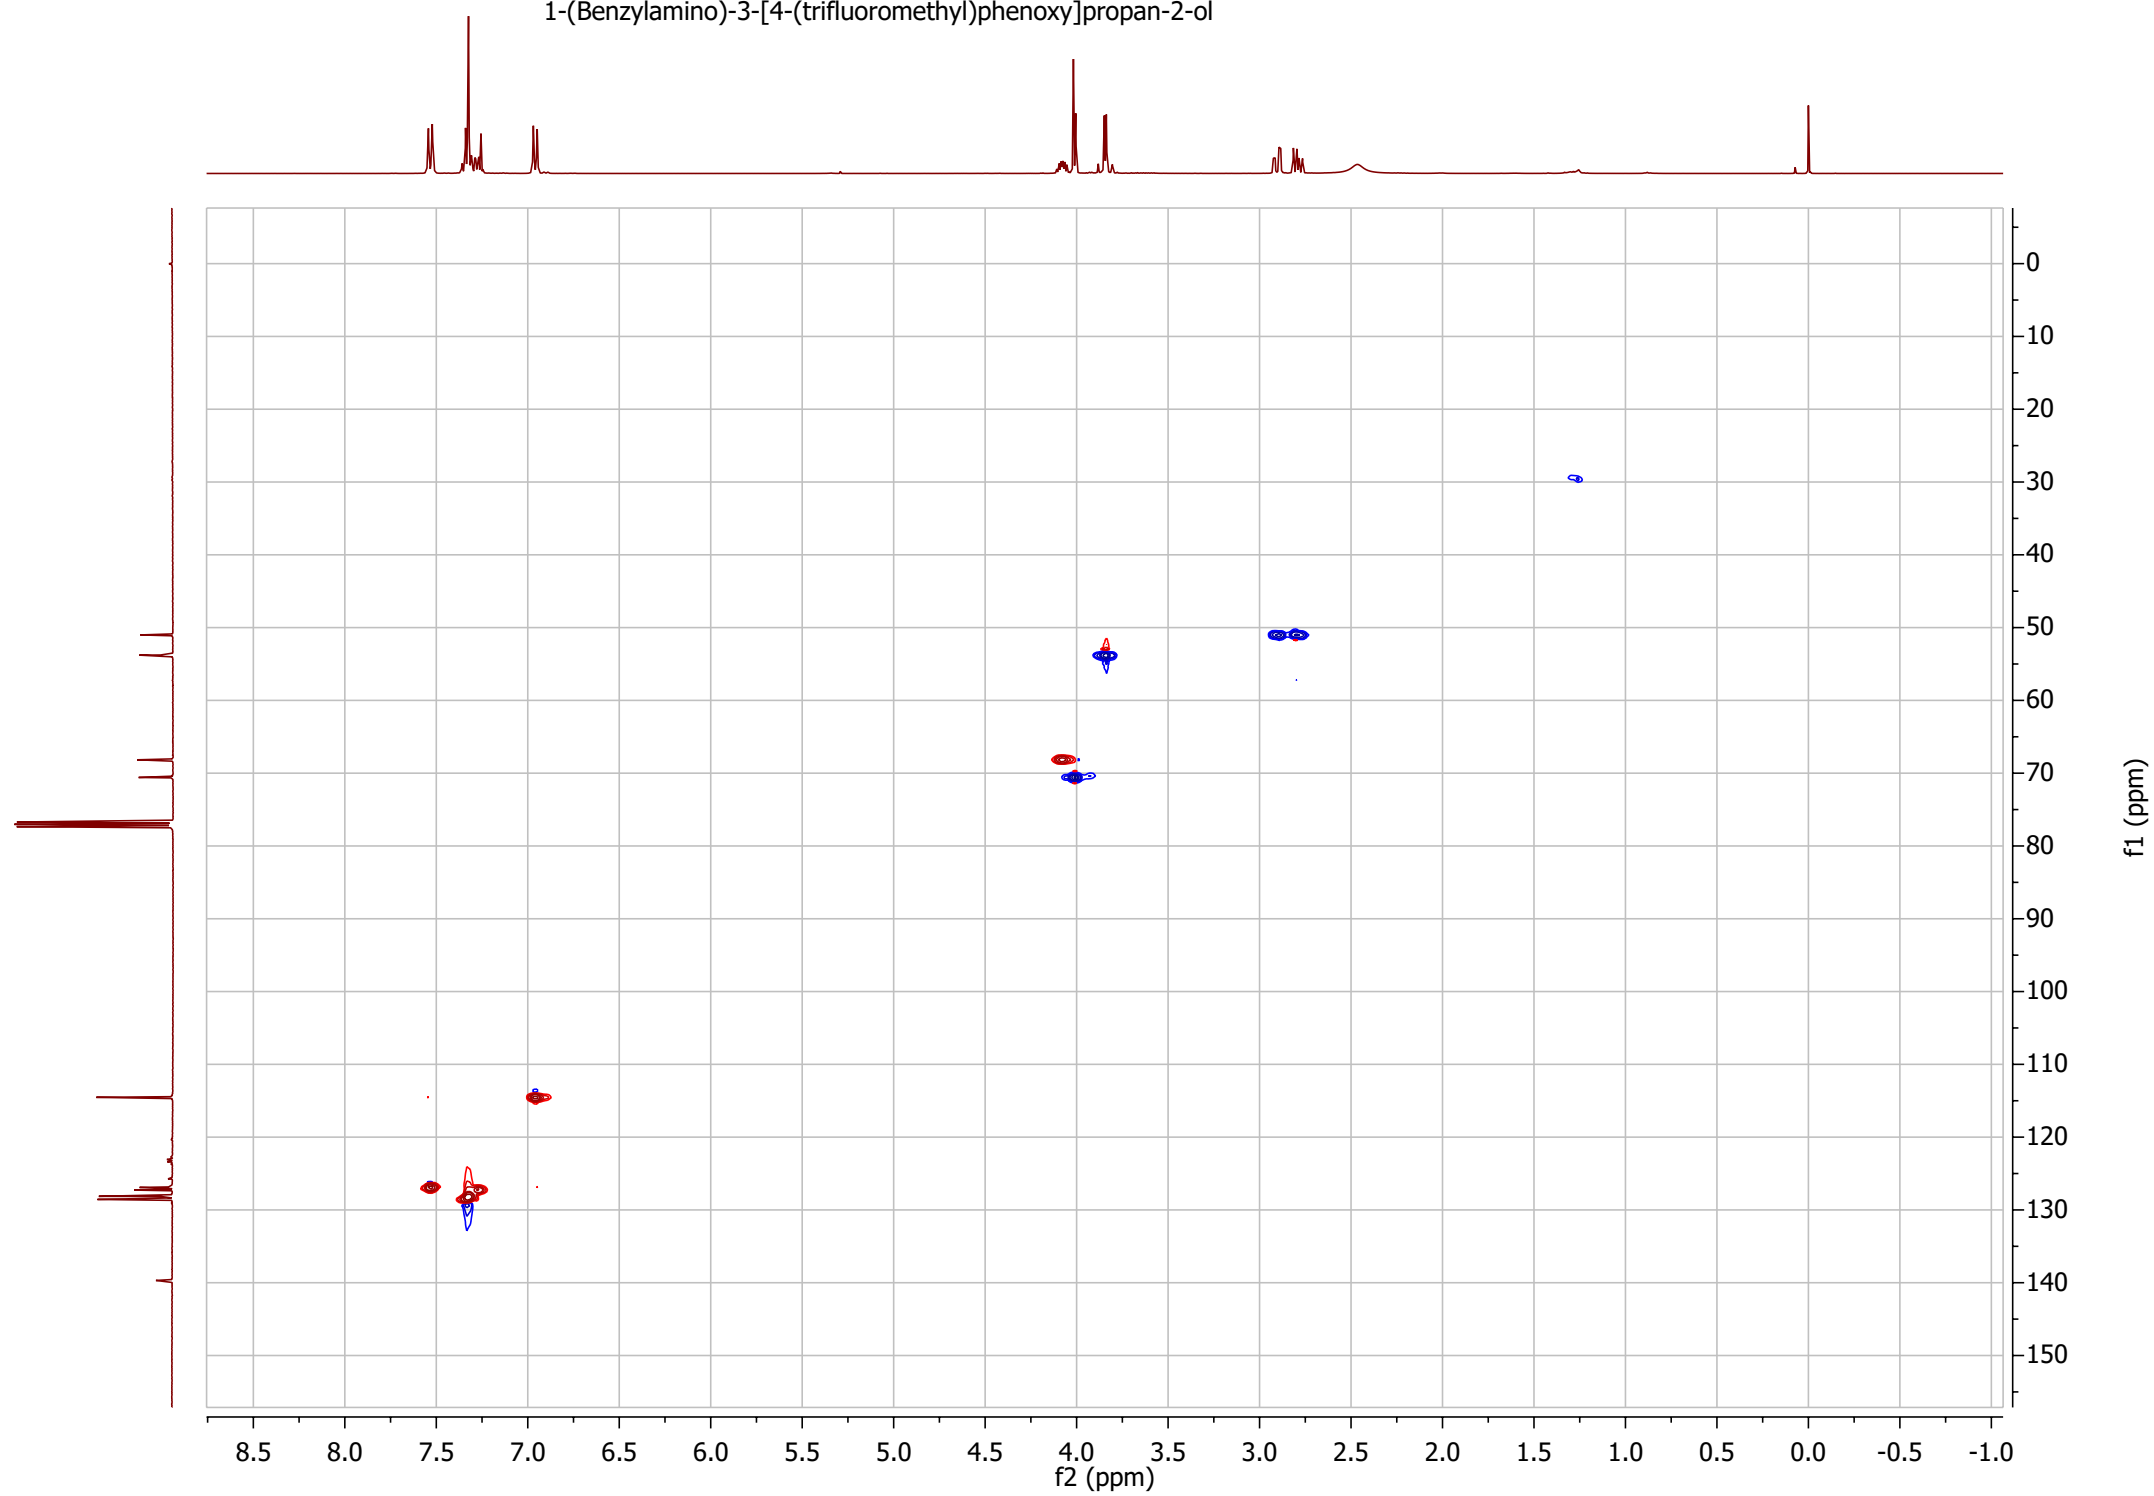



1-[Methyl(phenyl)amino]-3-[4-(trifluoromethyl)phenoxy]propan-2-ol

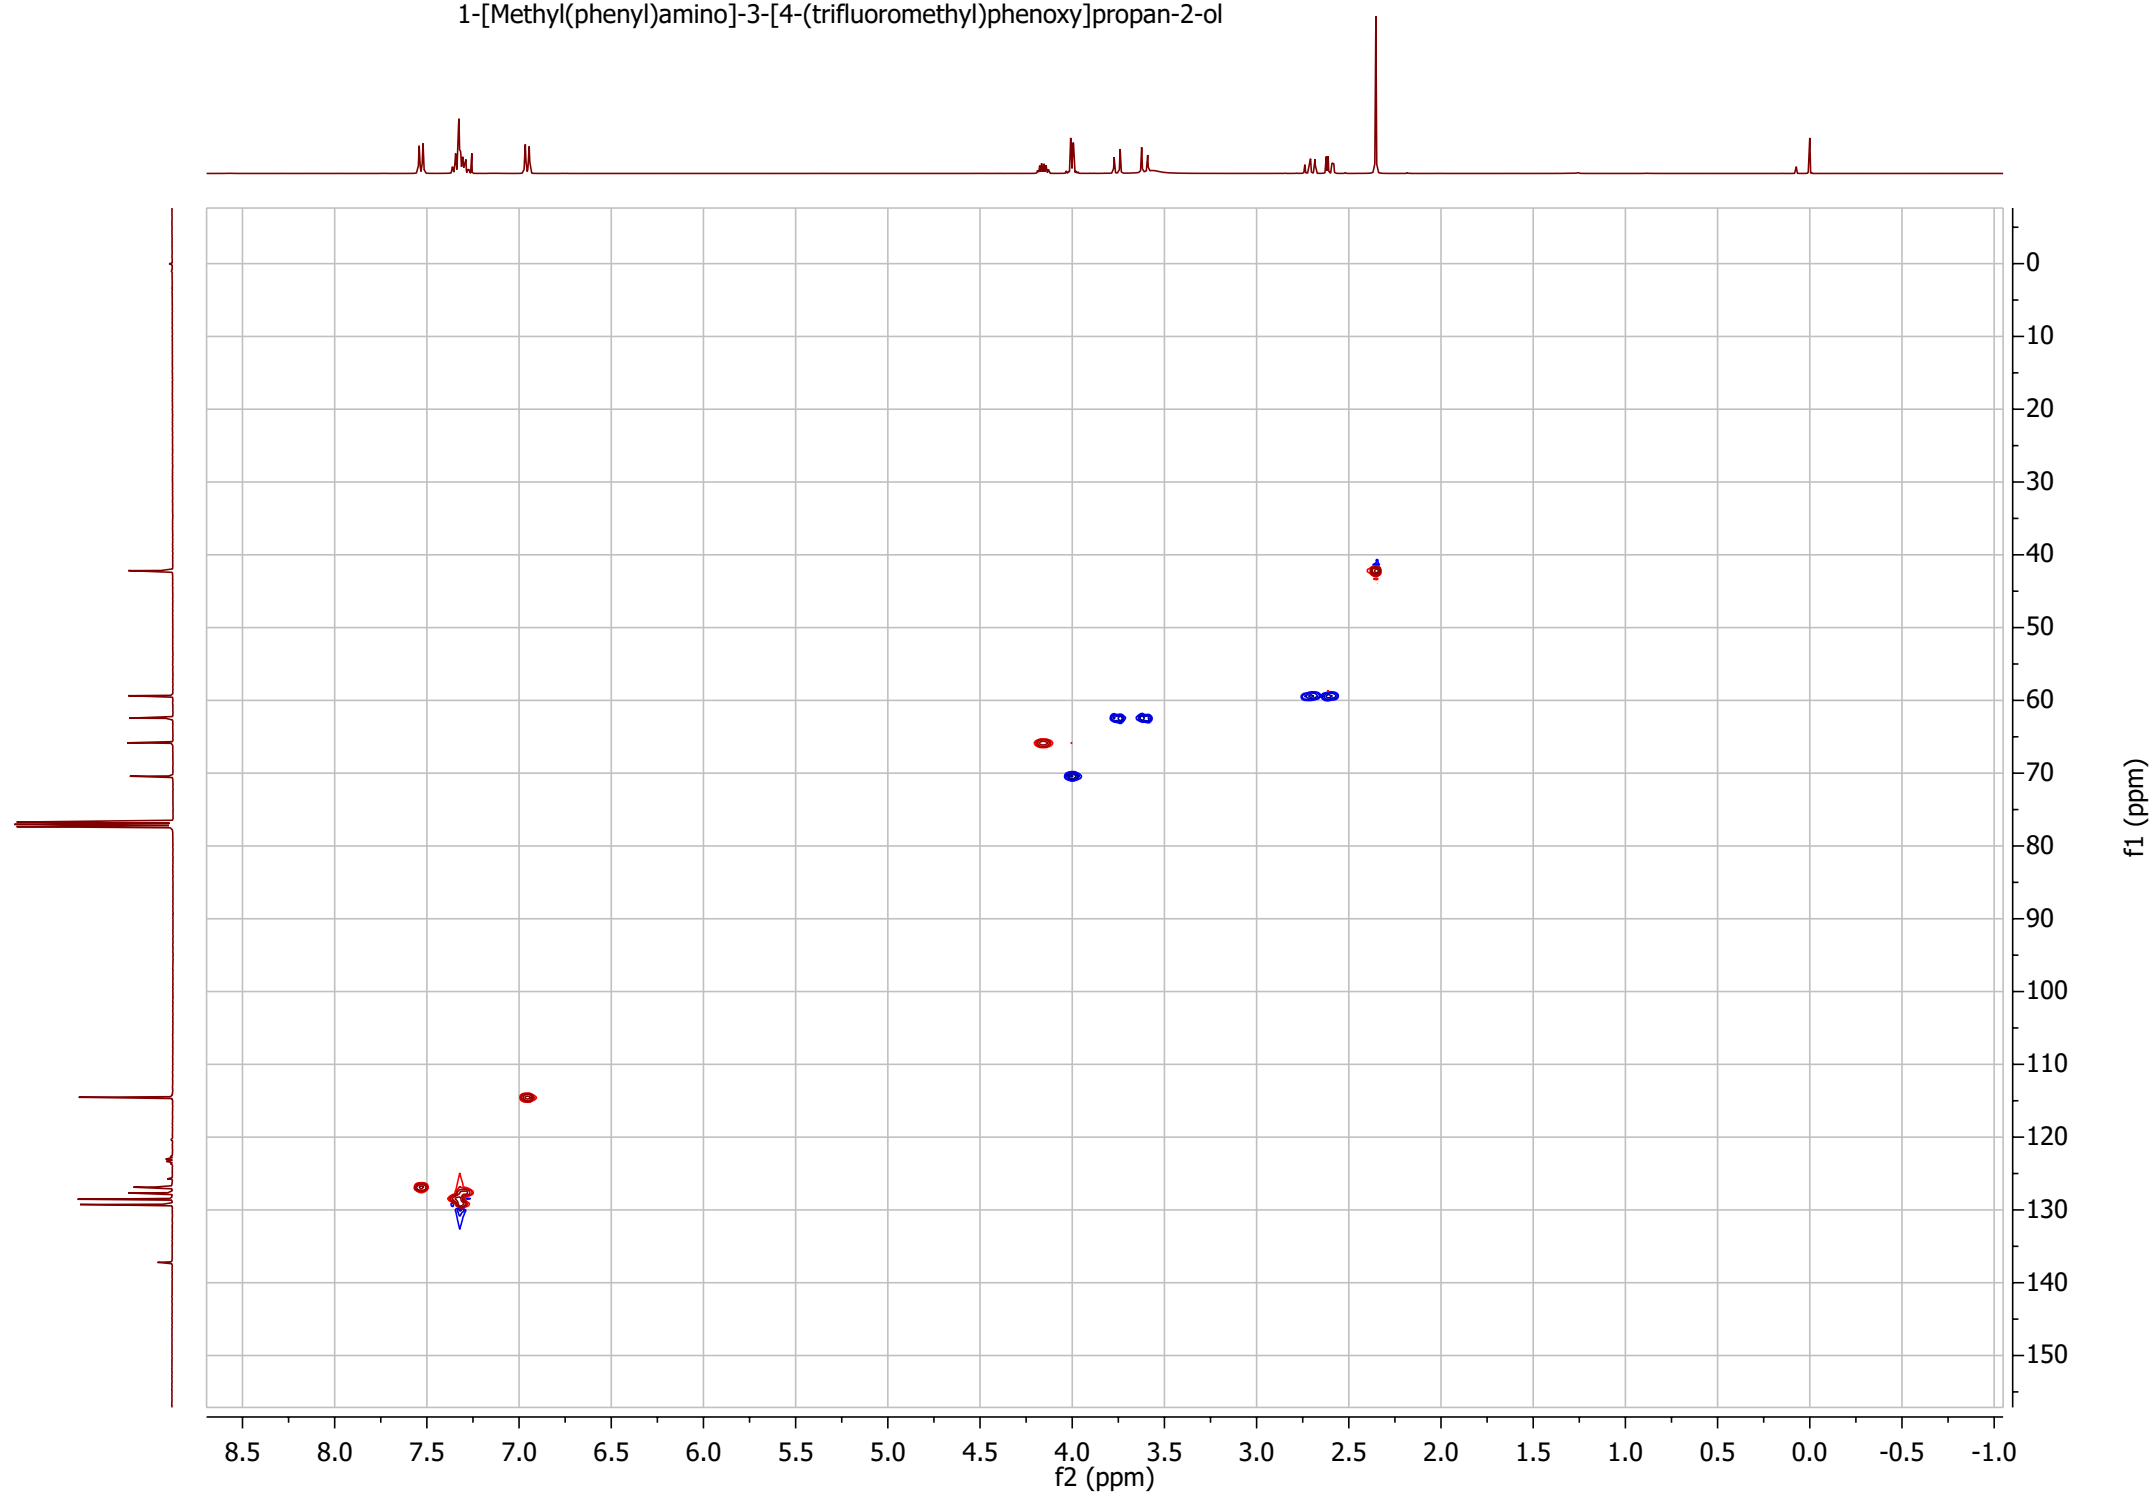

1-(Dimethylamino)-3-[4-(trifluoromethyl)phenoxy]propan-2-ol

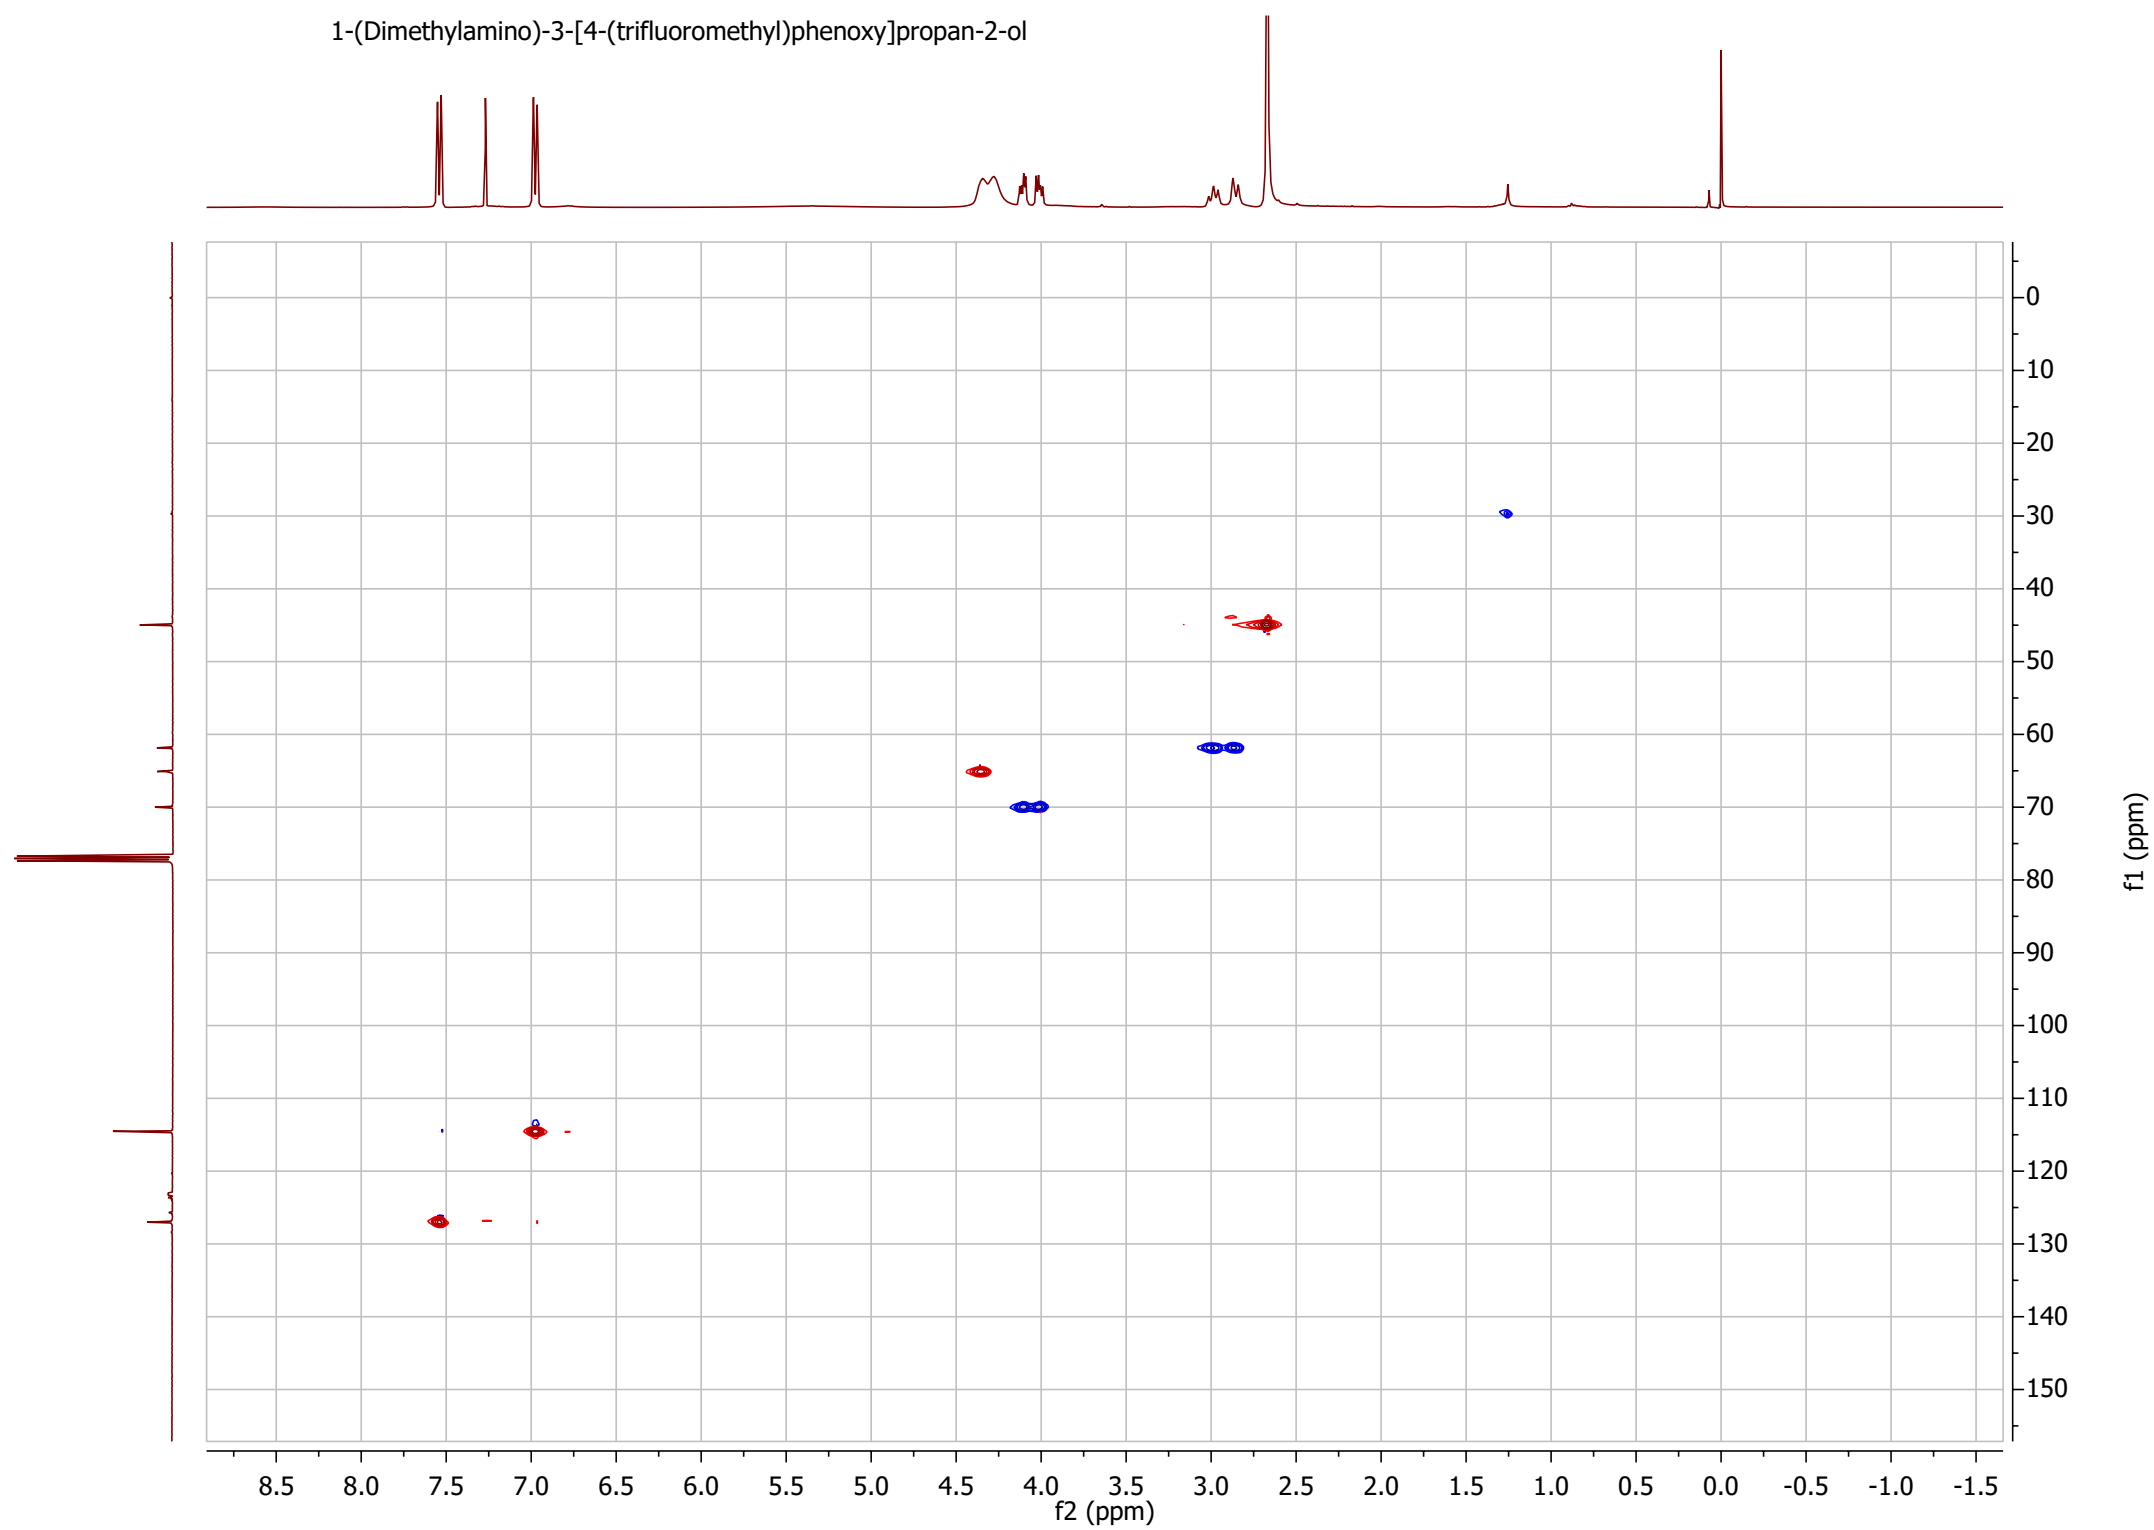

1-(4-Bromophenoxy)-3-(dibenzylamino)propan-2-ol

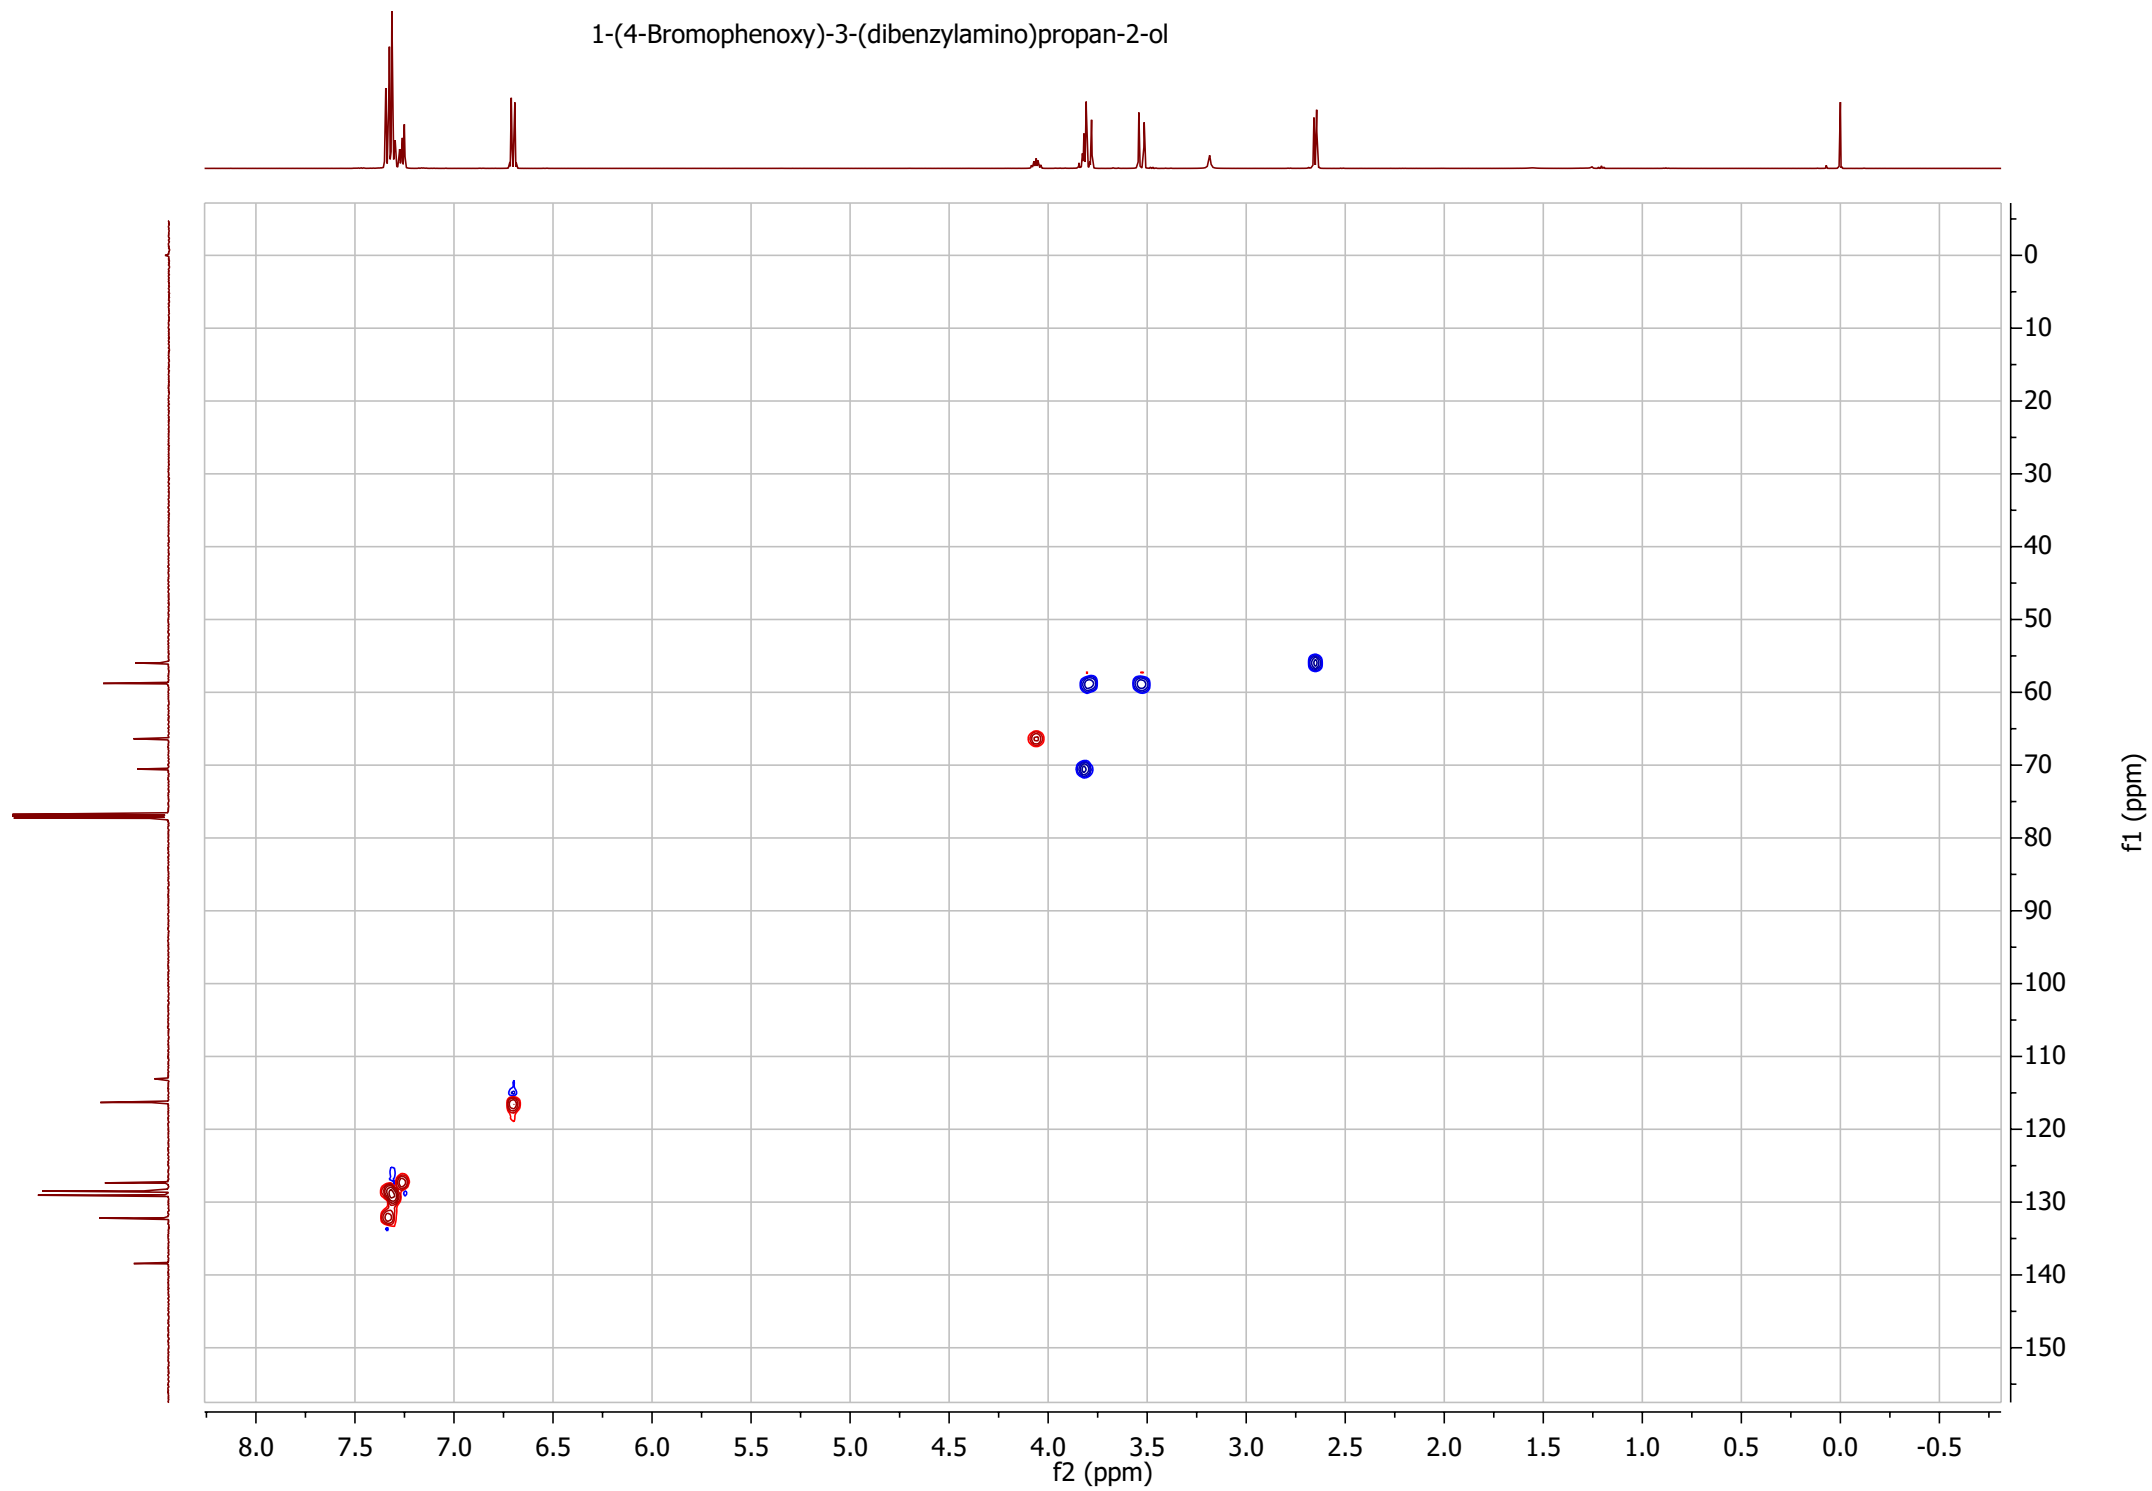

1-(Dibenzylamino)-3-(4-nitrophenoxy)propan-2-ol

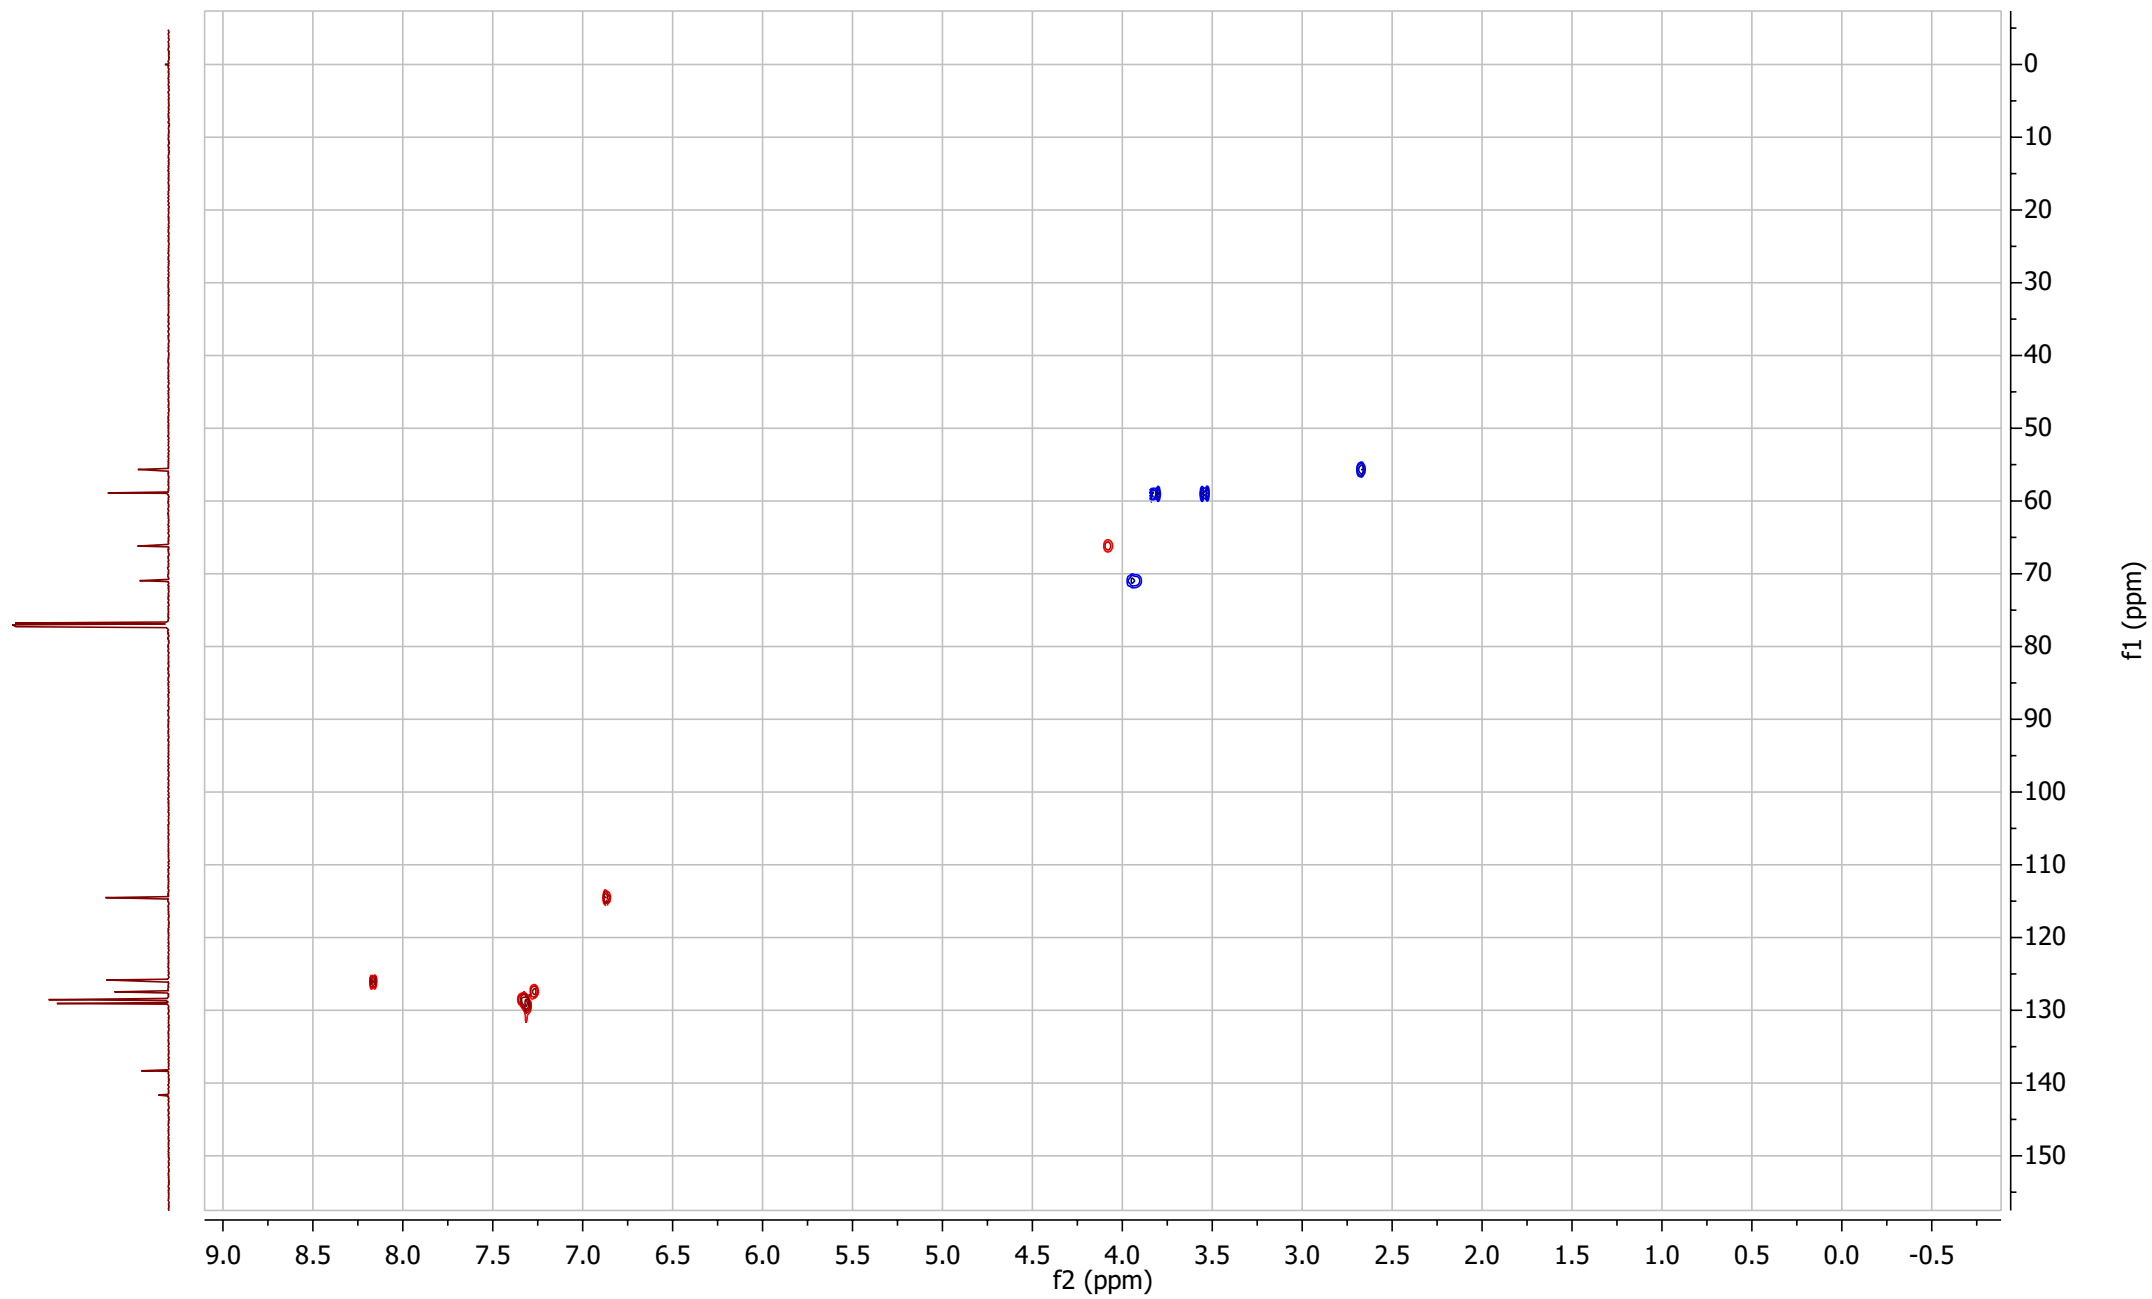

1-(Dibenzylamino)-3-(4-iodophenoxy)propan-2-ol

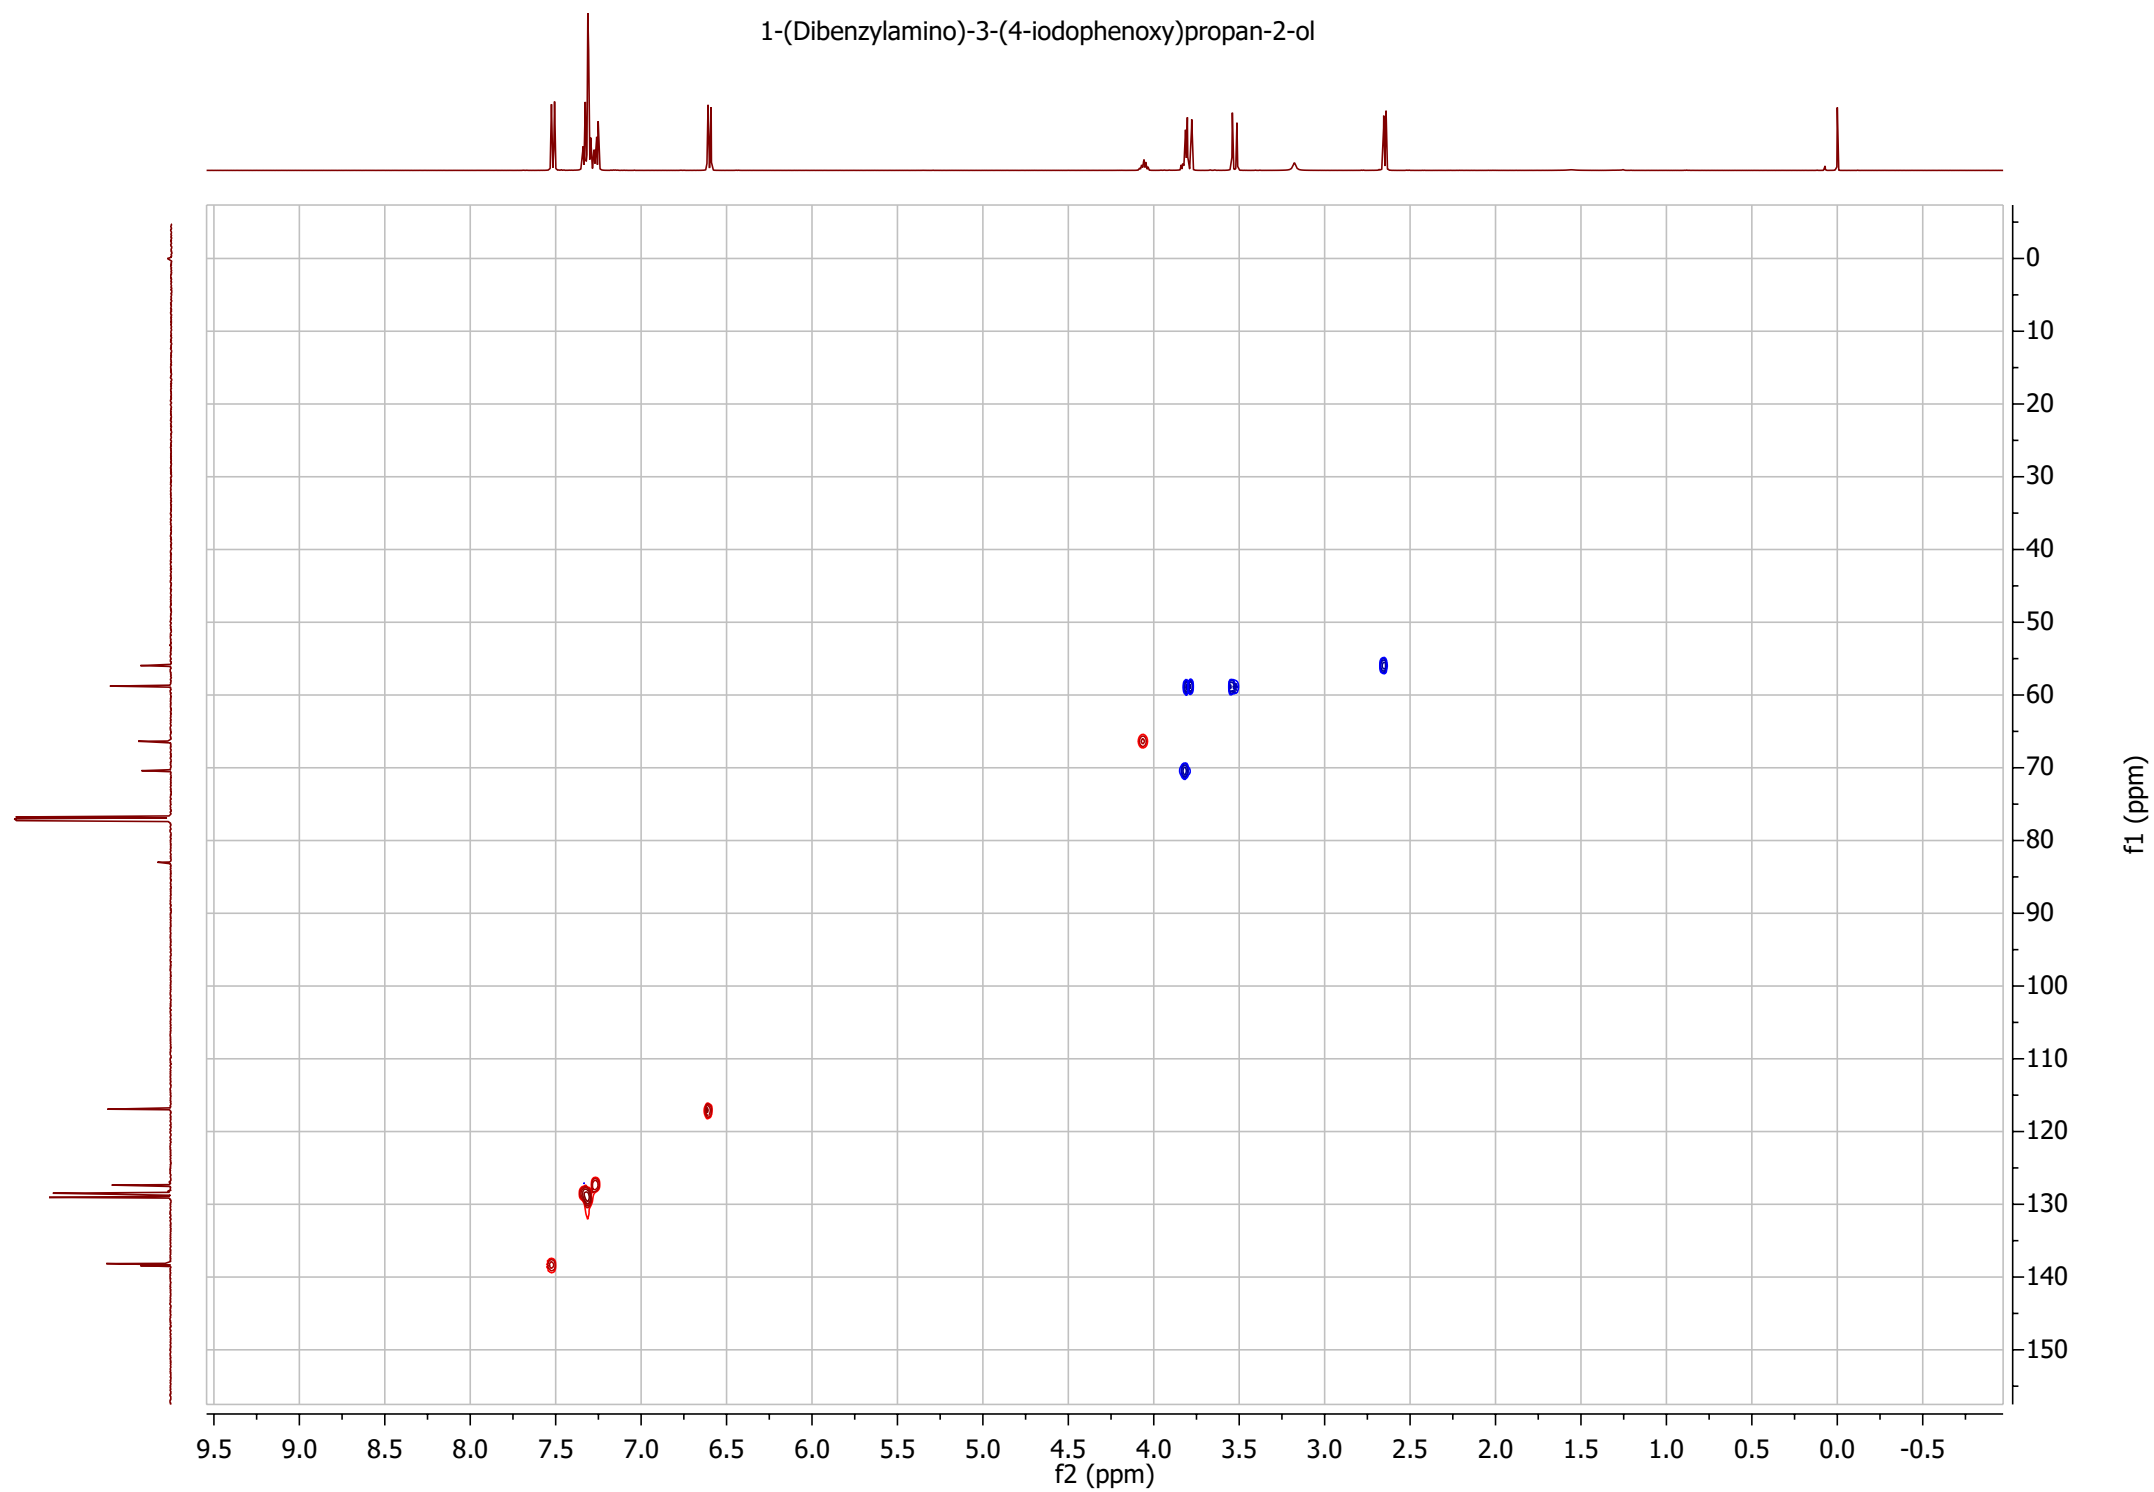

1-(Dibenzylamino)-3-[4-(pentafluoro-λ6-sulfaneyl)phenoxy]propan-2-ol

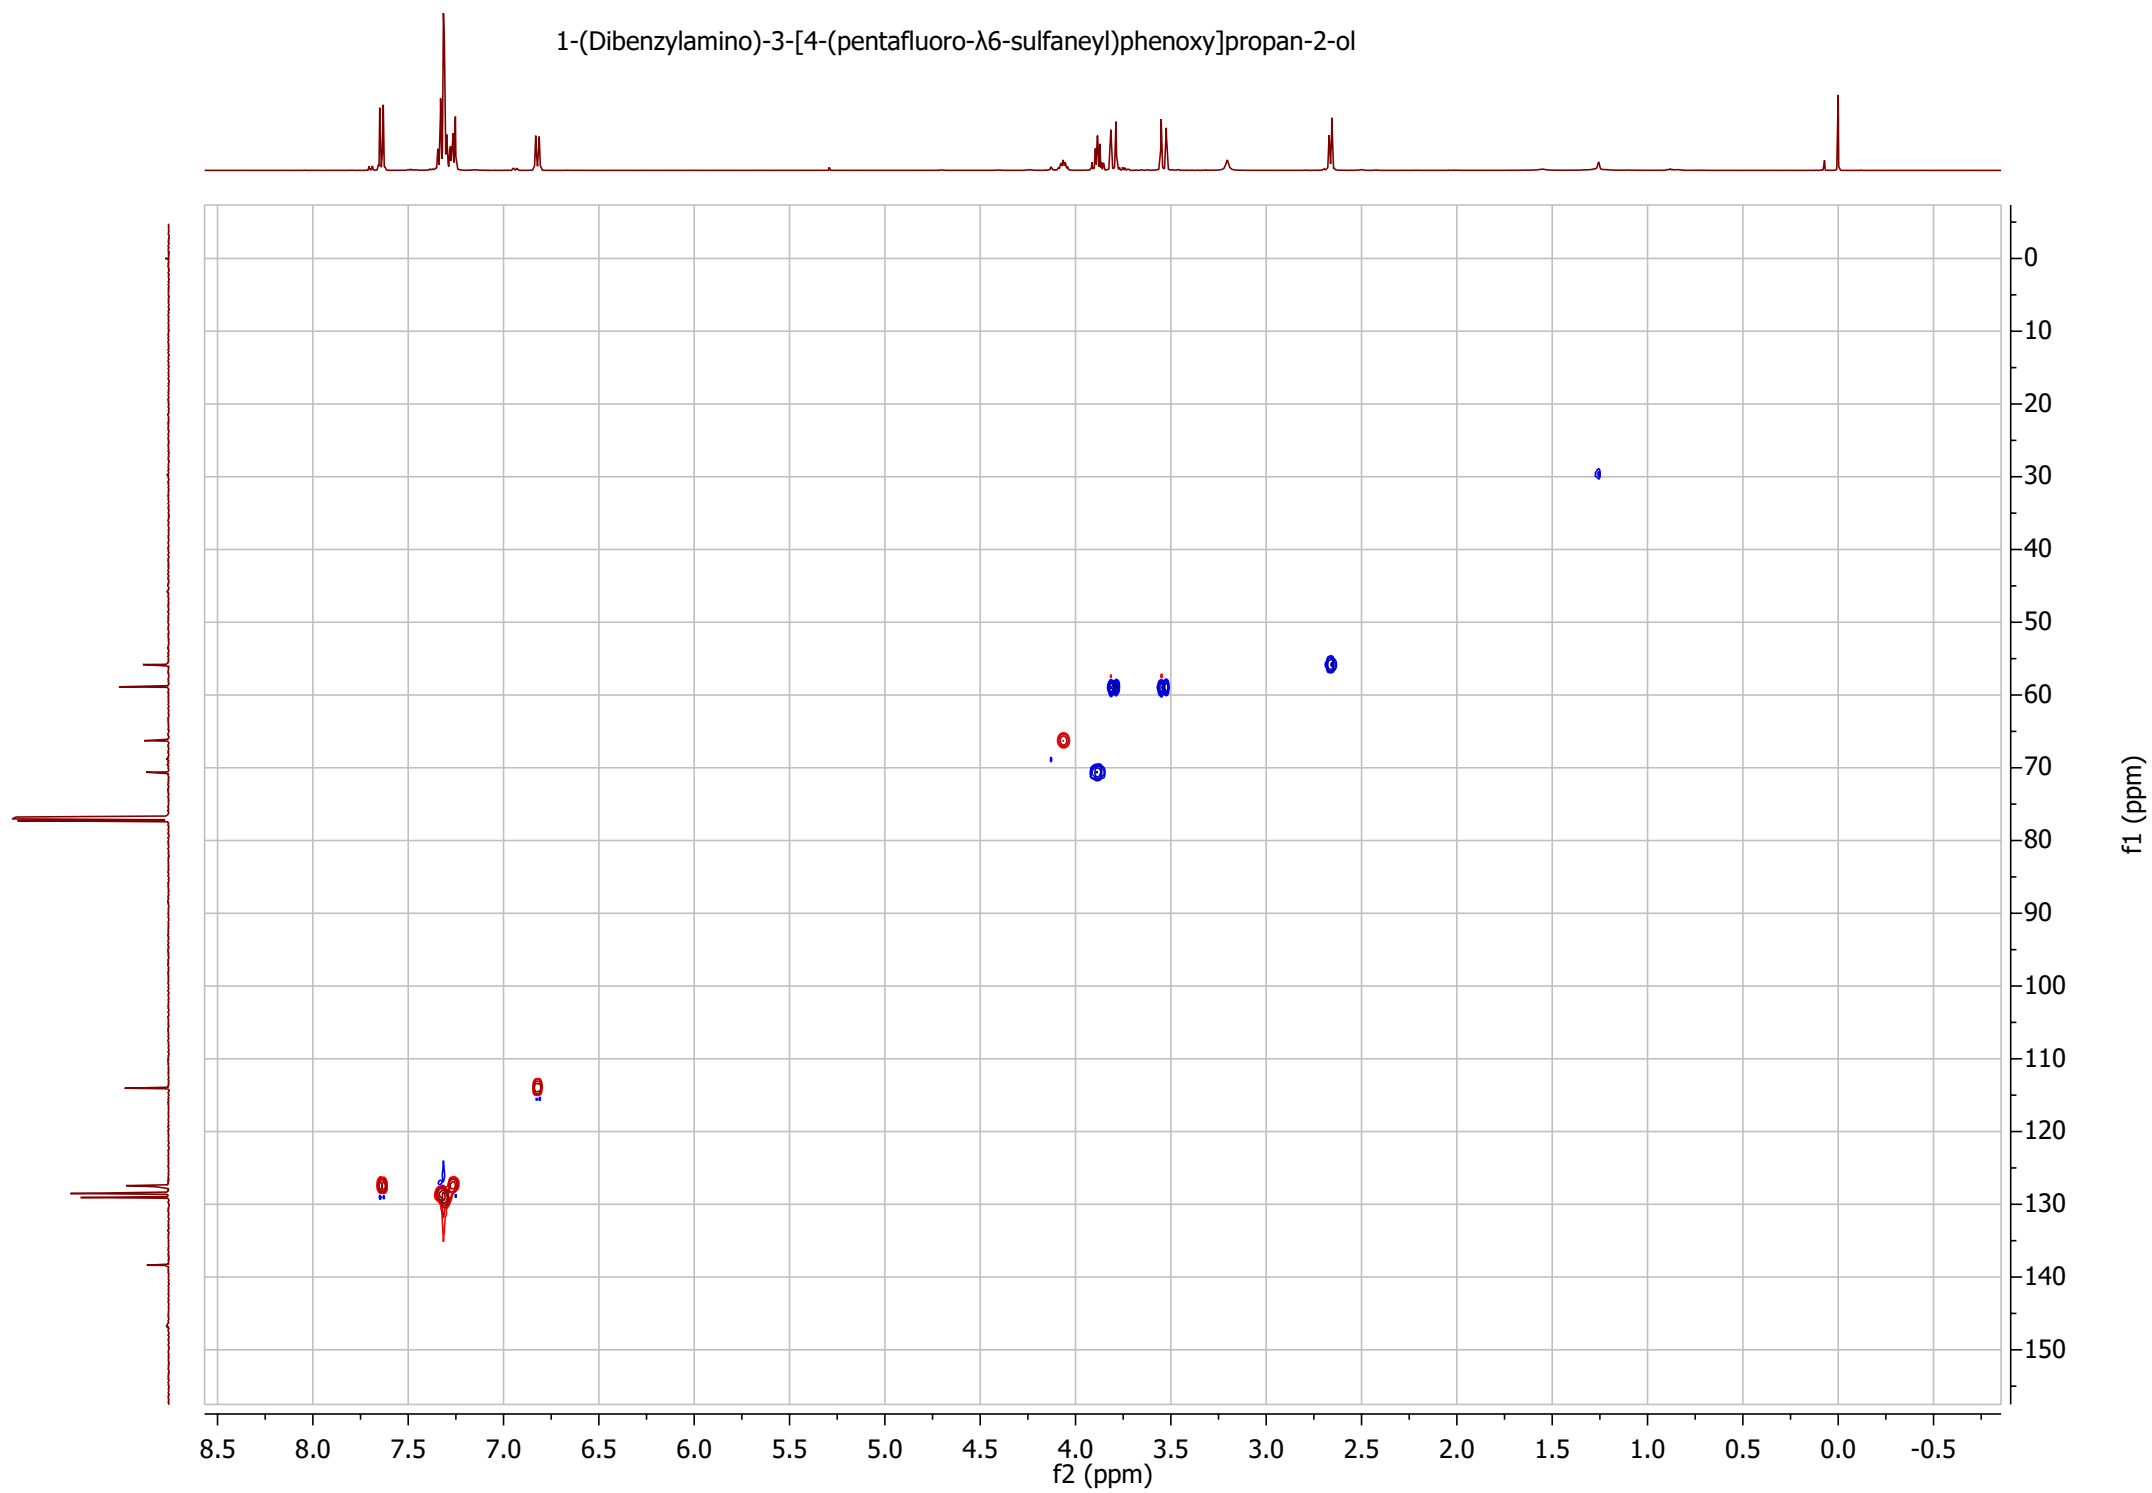

1-[Benzyl(4-chlorobenzyl)amino]-3-(4-chlorophenoxy)propan-2-ol

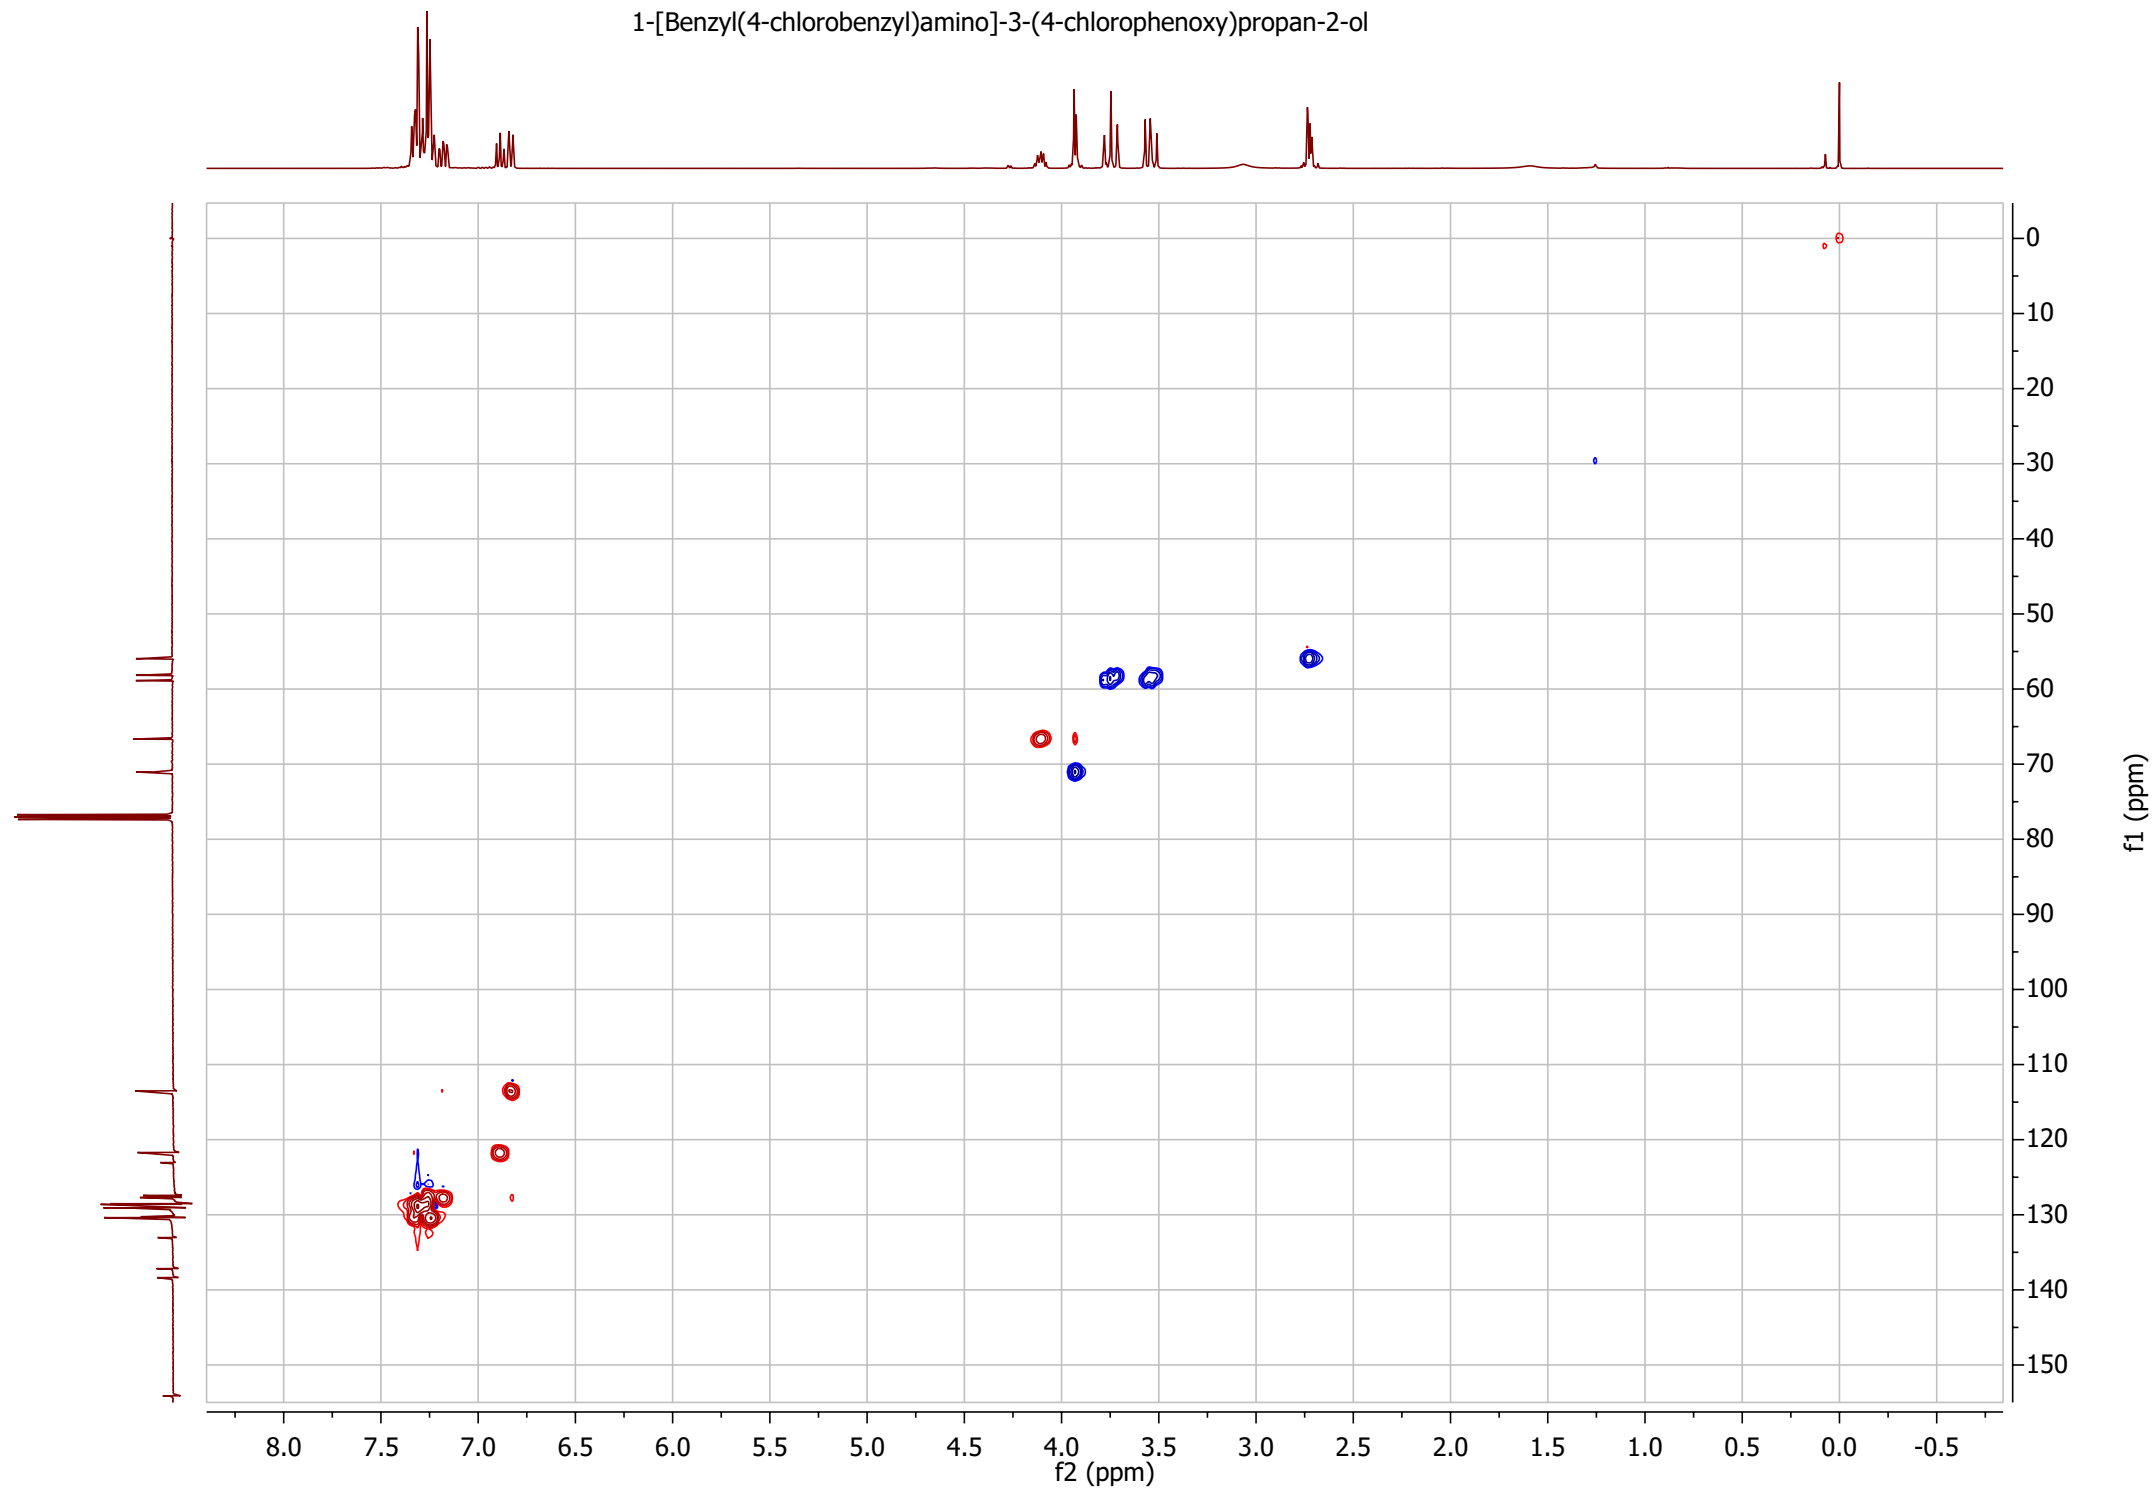

1-[Benzyl(4-methylbenzyl)amino]-3-(4-chlorophenoxy)propan-2-ol

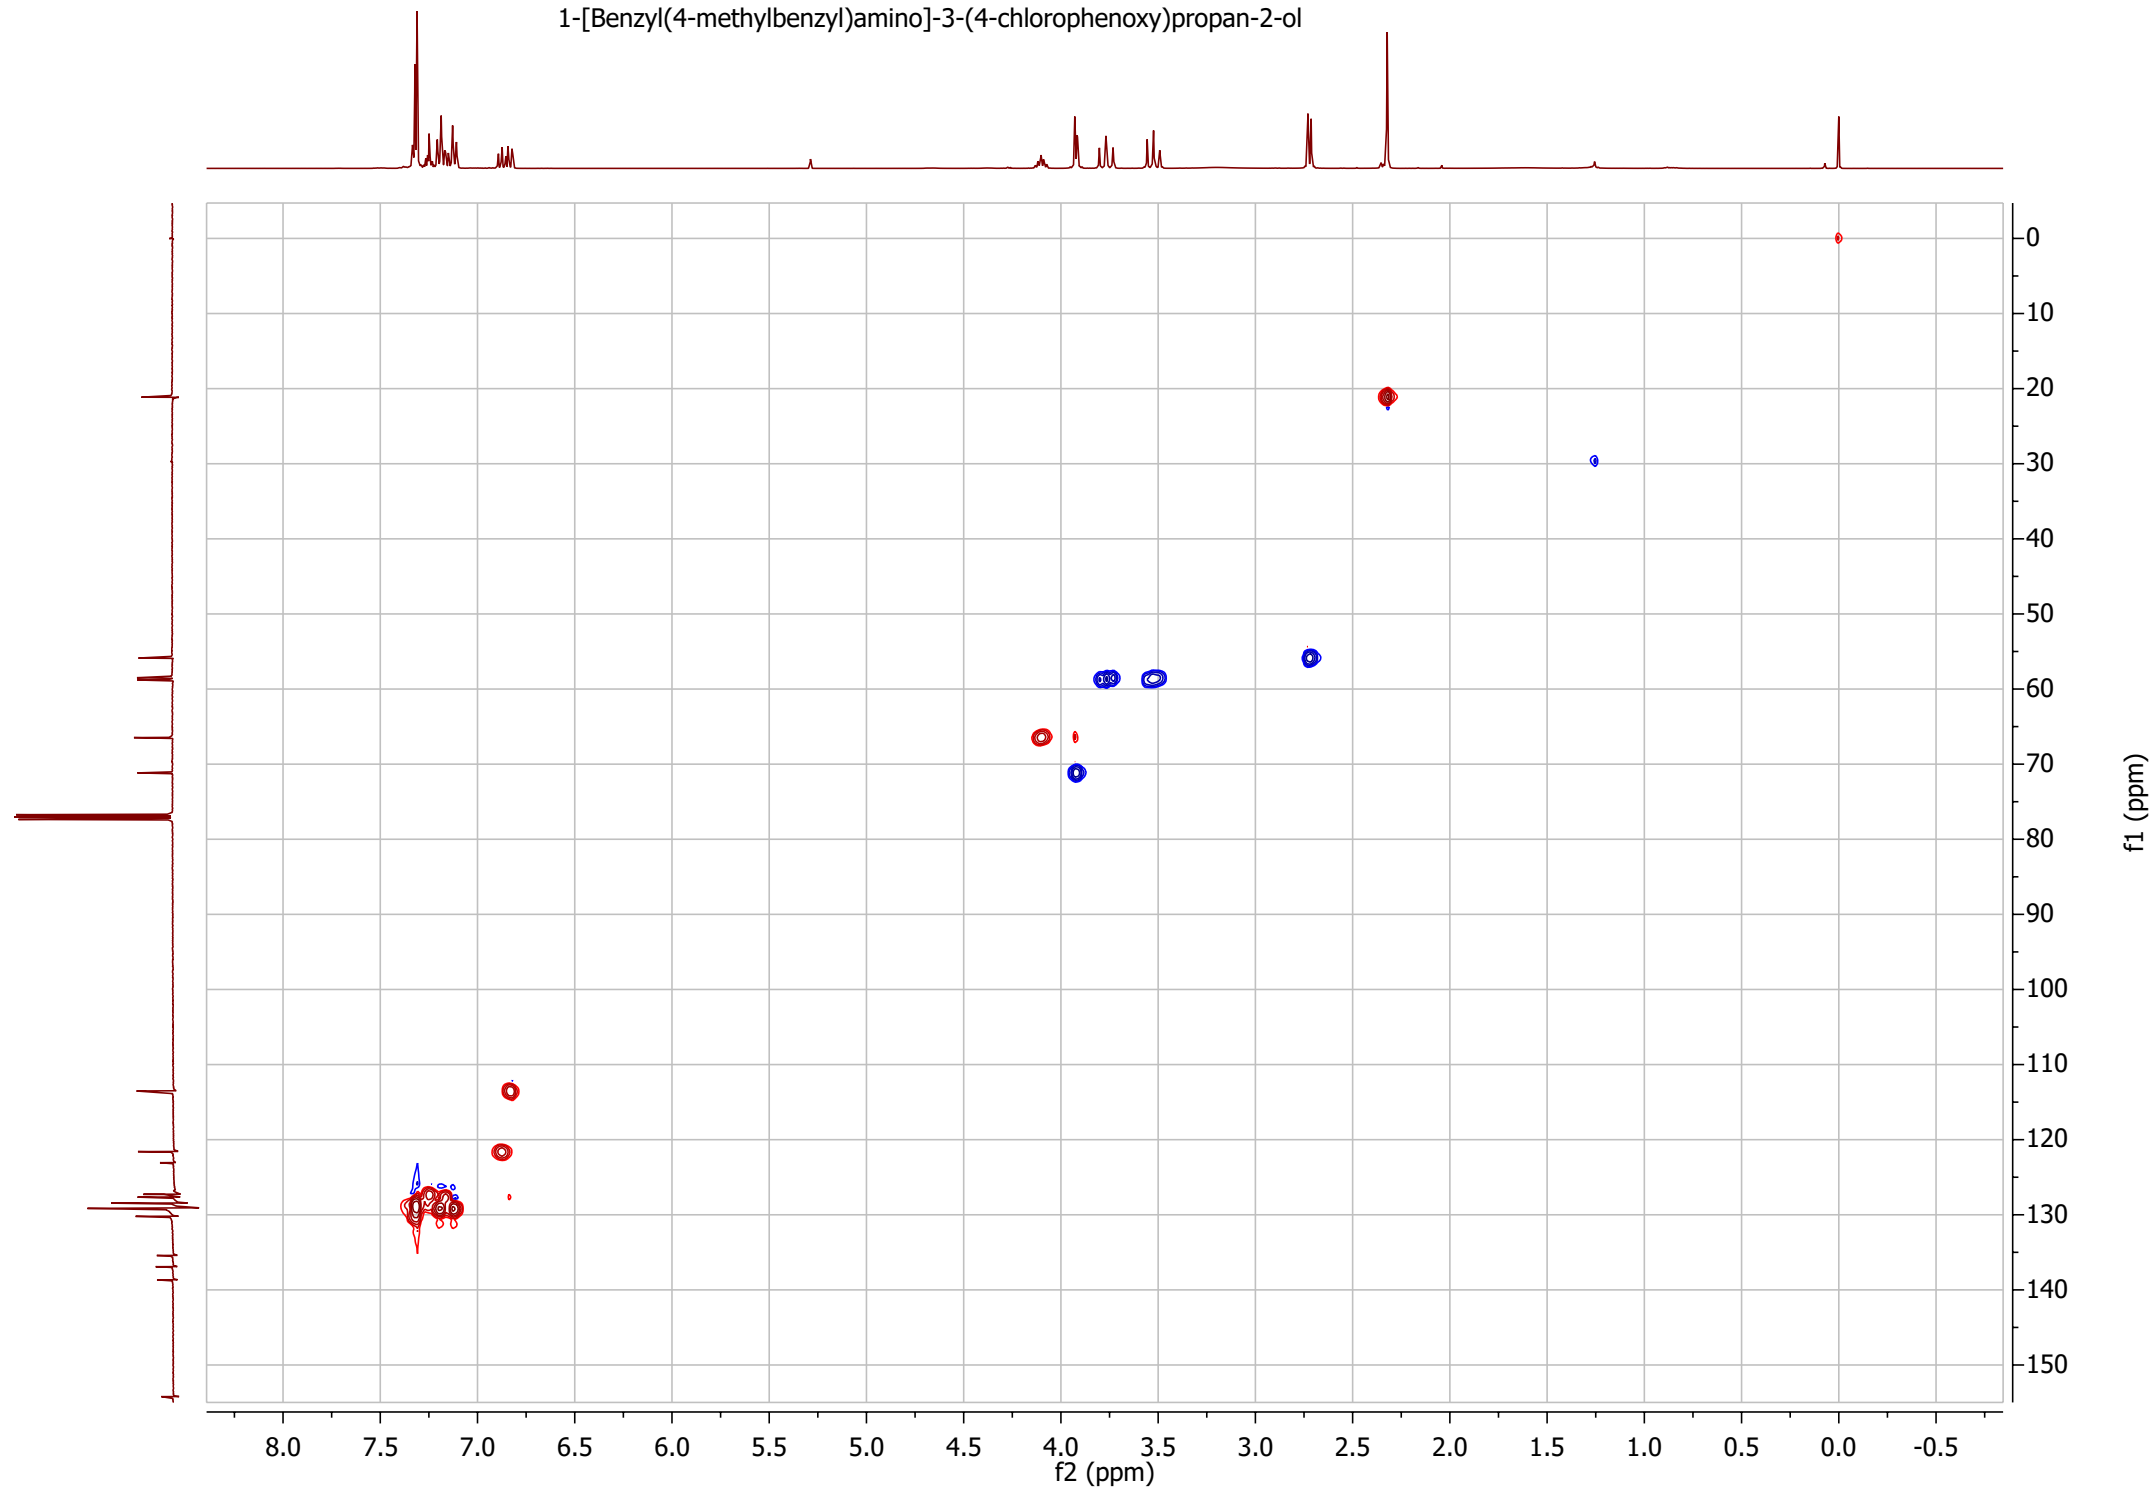



1-[Bis(4-methoxybenzyl)amino]-3-(4-chlorophenoxy)propan-2-ol

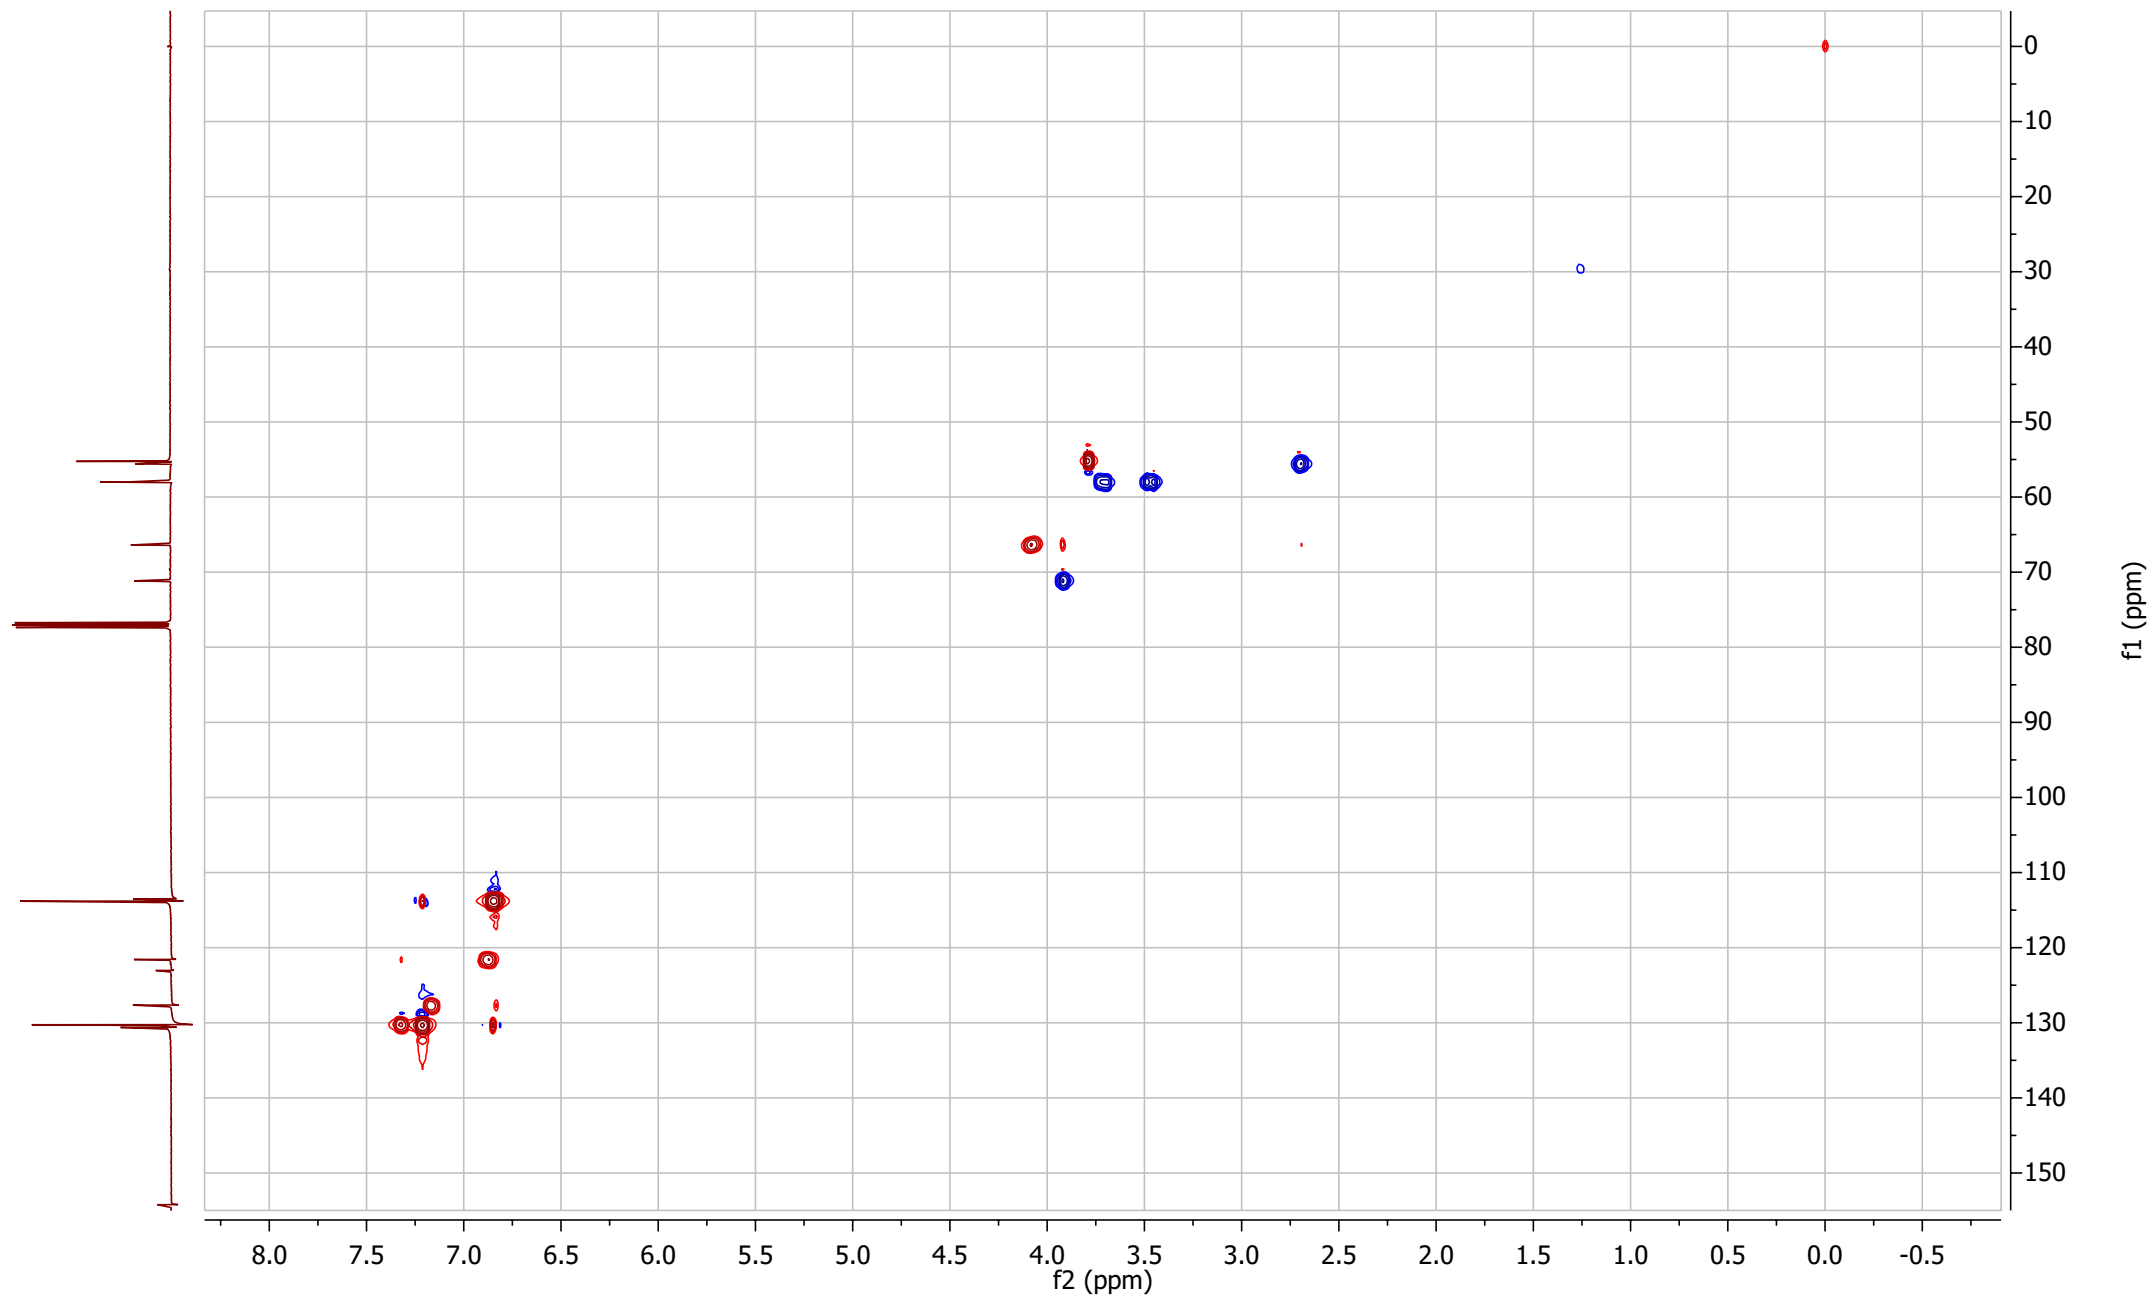

1-[Benzyl(3,4-dichlorobenzyl)amino]-3-(4-chlorophenoxy)propan-2-ol

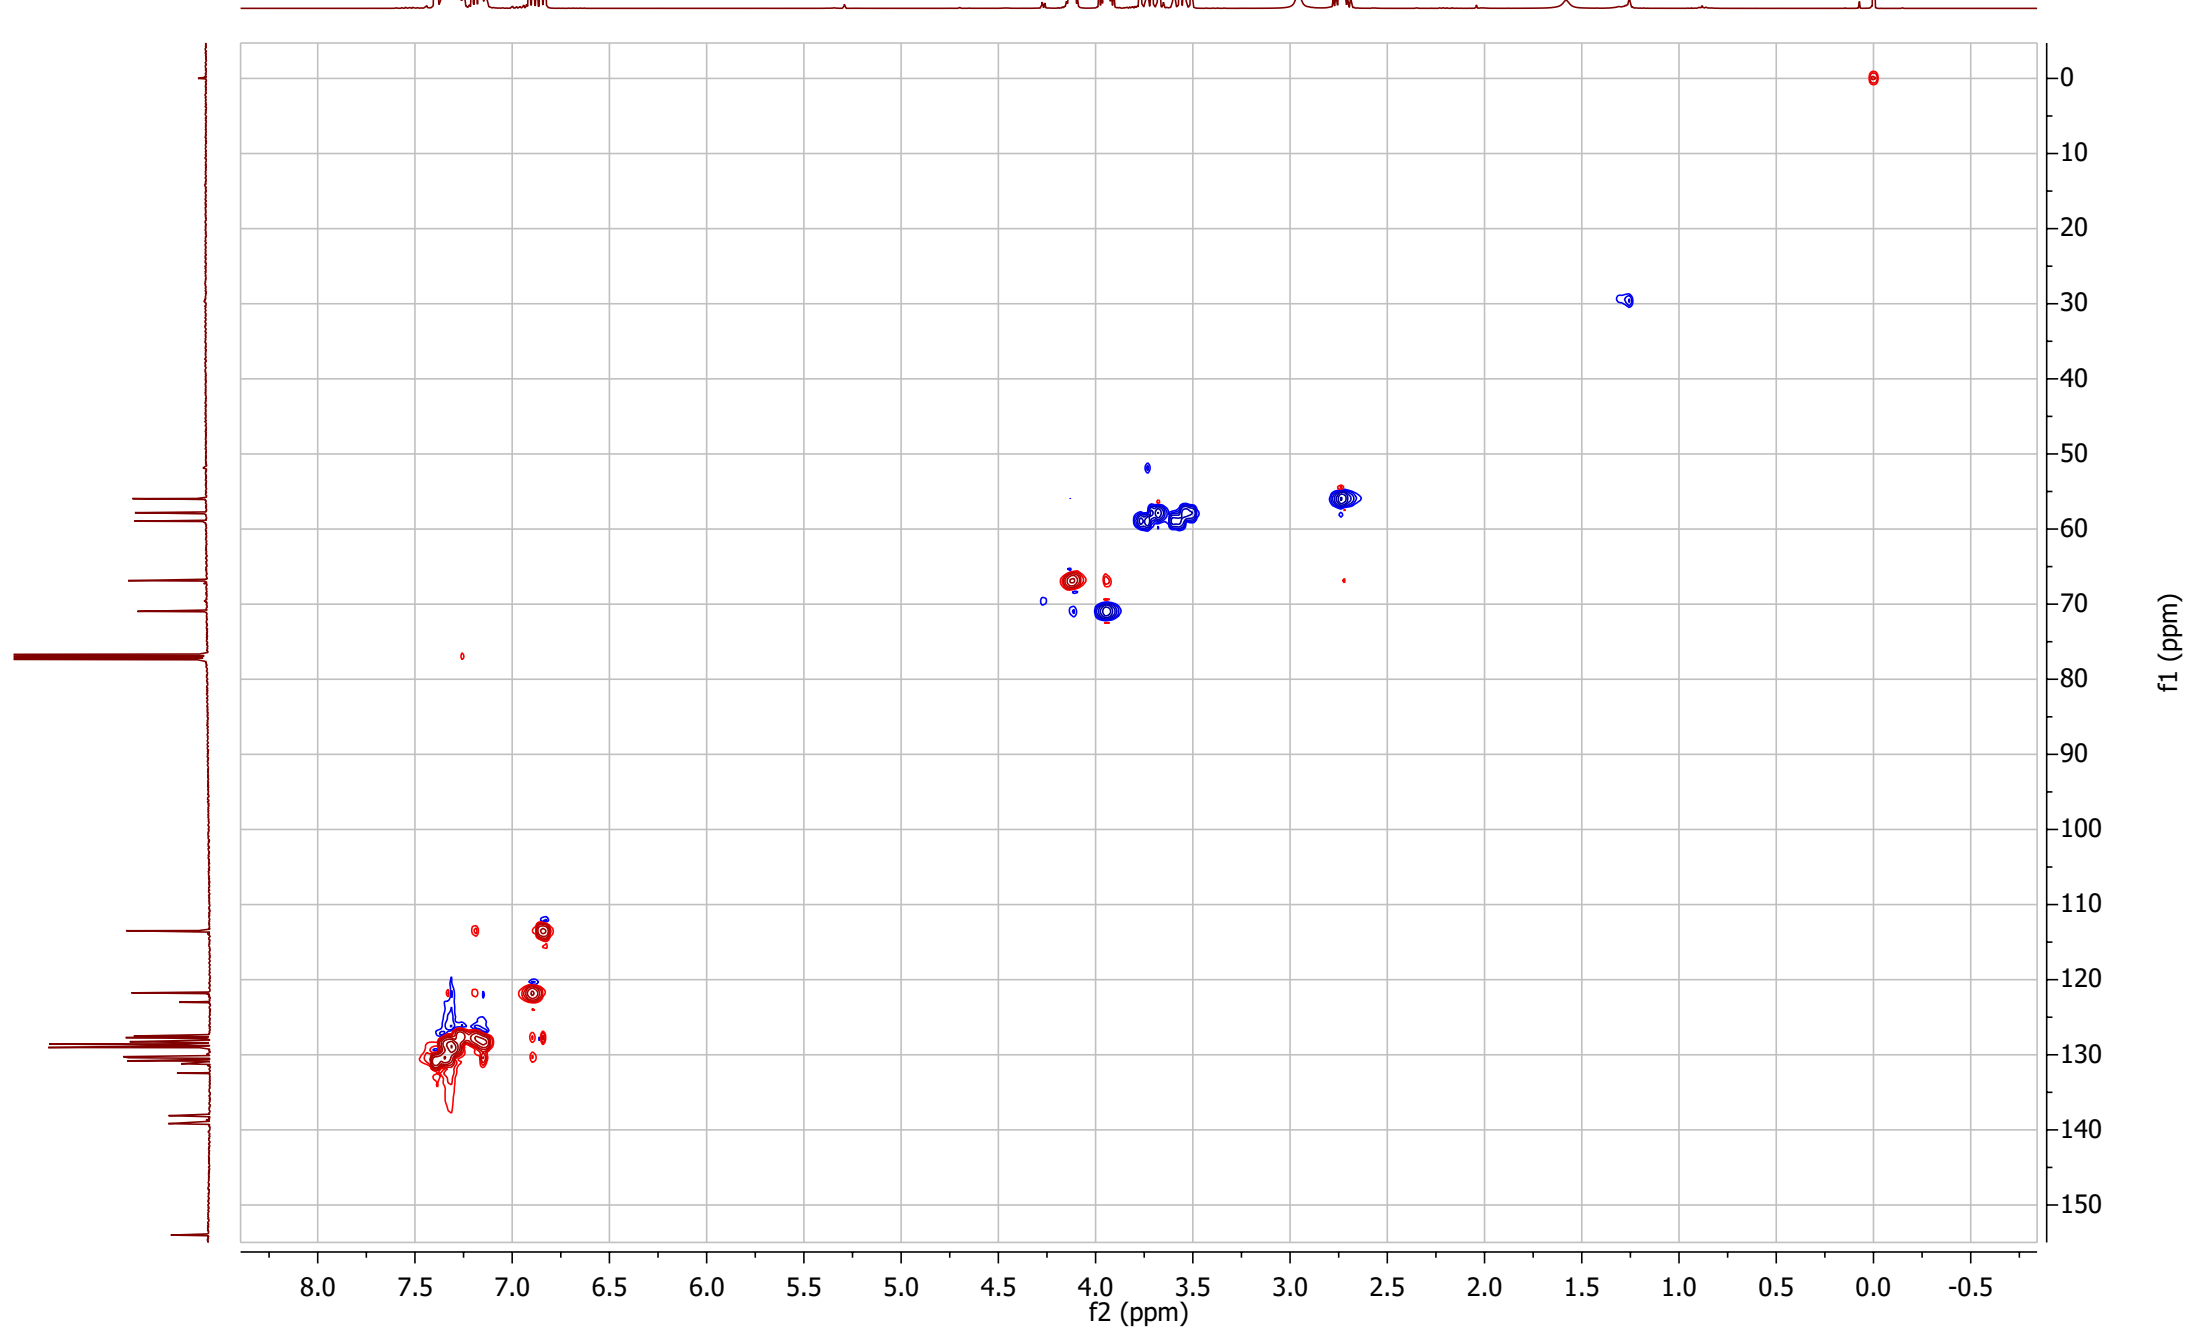

1-[Bis(4-chlorobenzyl)amino]-3-(4-chlorophenoxy)propan-2-ol

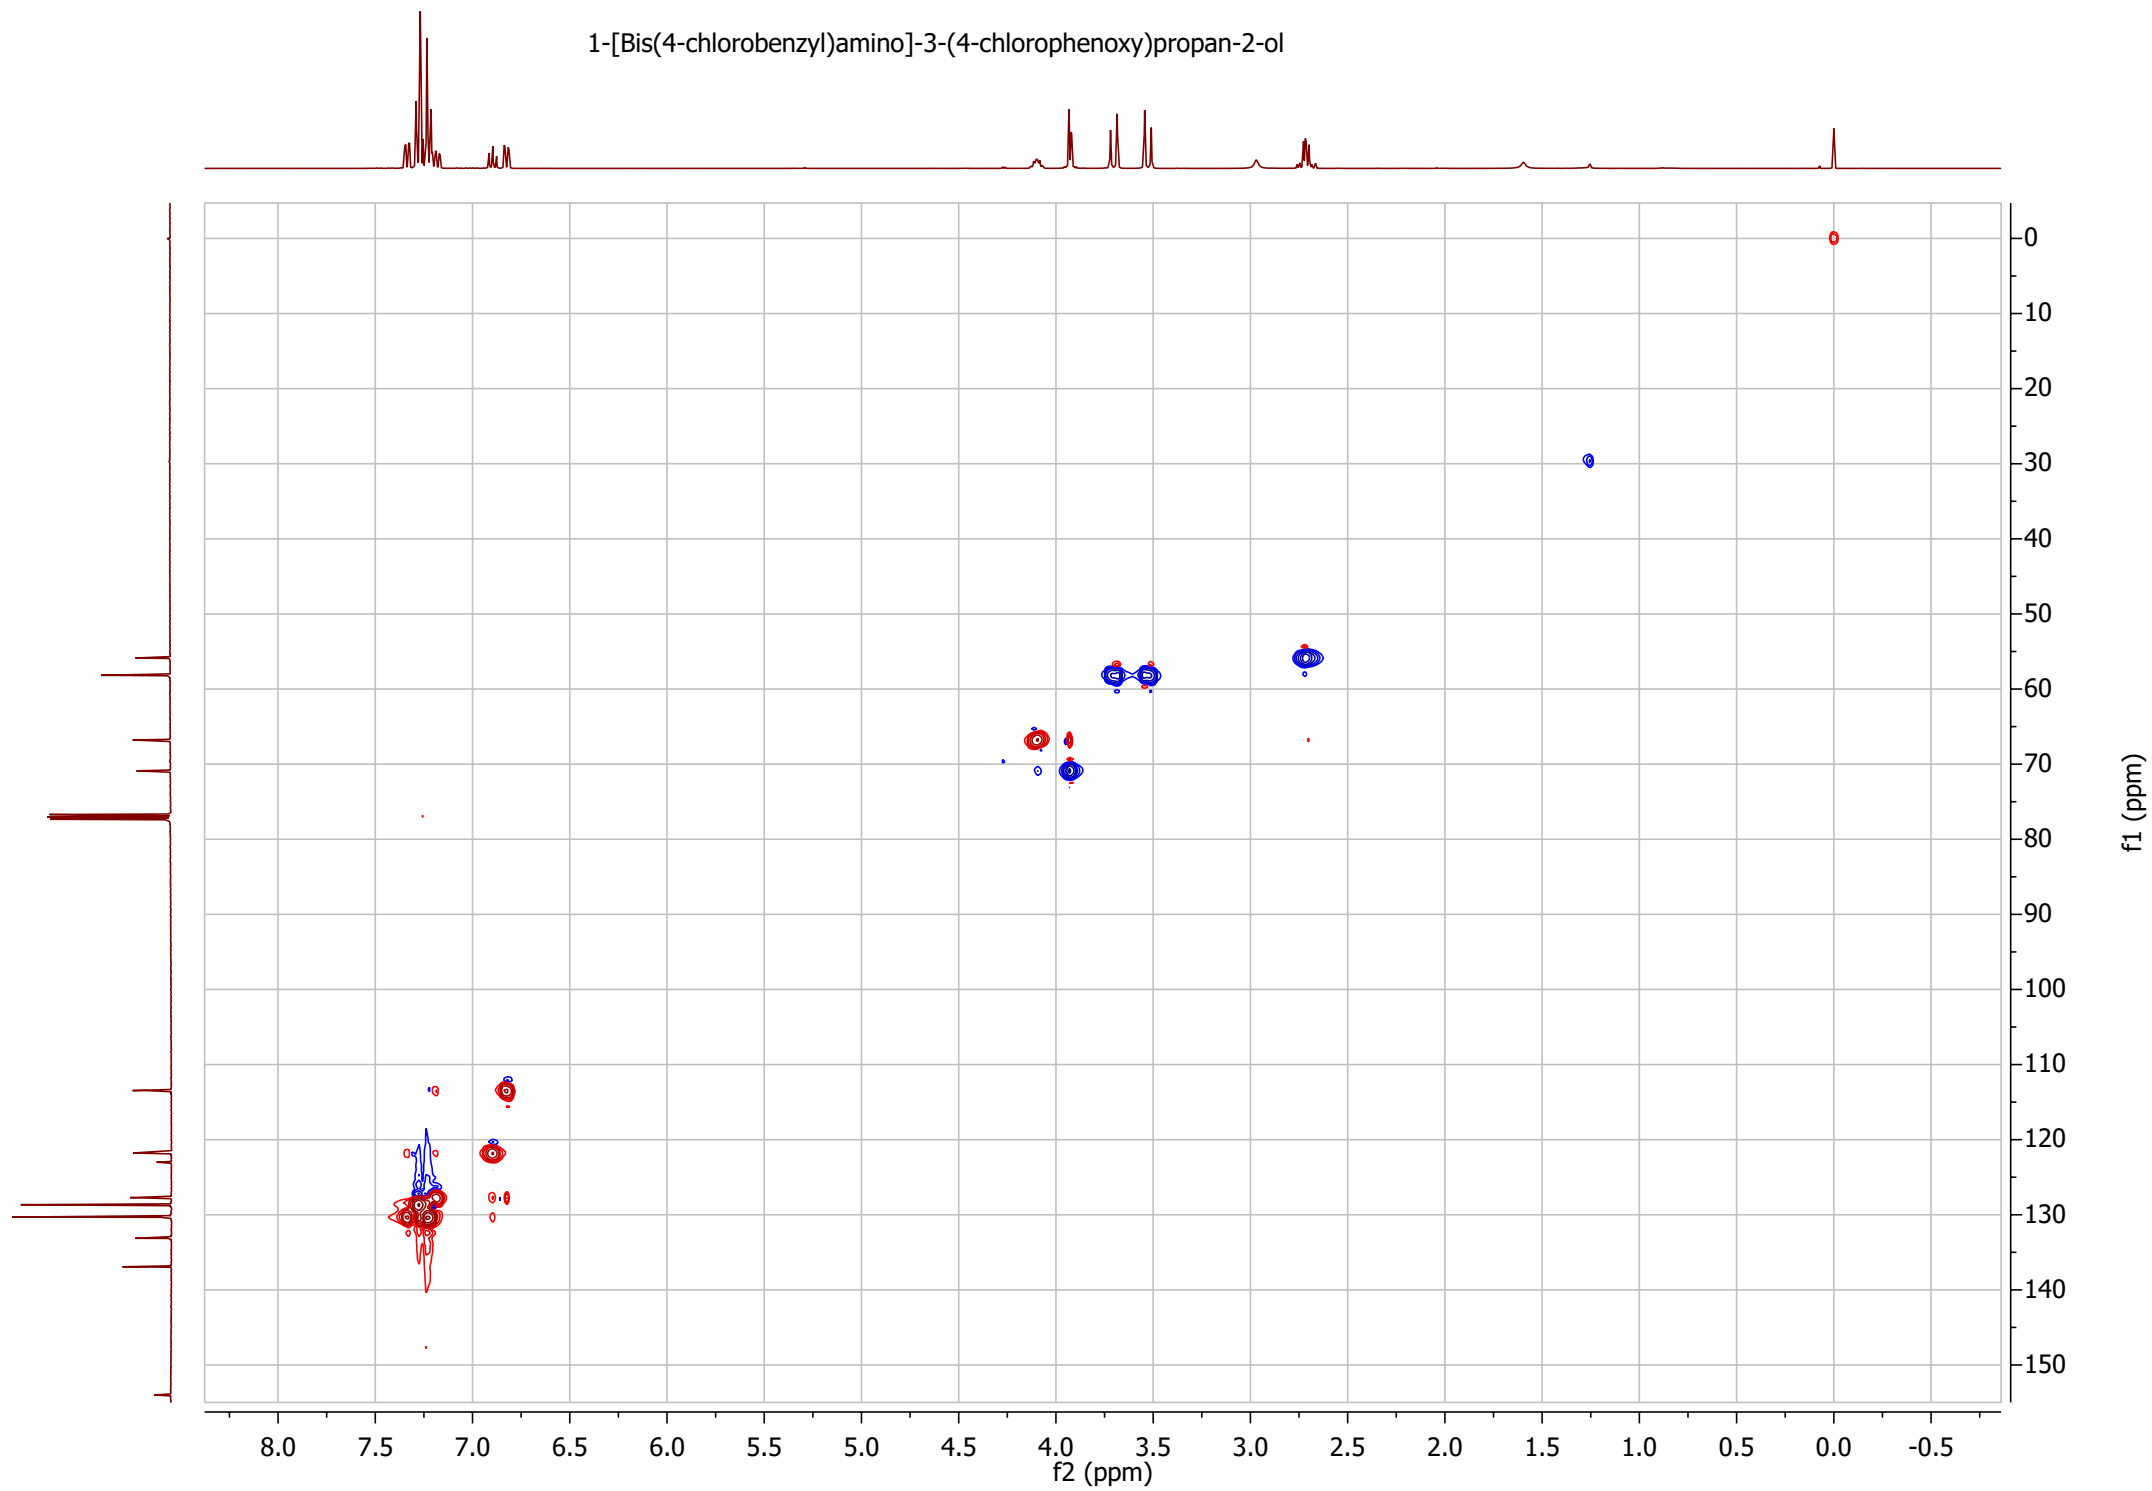

1-[Benzyl(4-methoxybenzyl)amino]-3-(4-chlorophenoxy)propan-2-ol

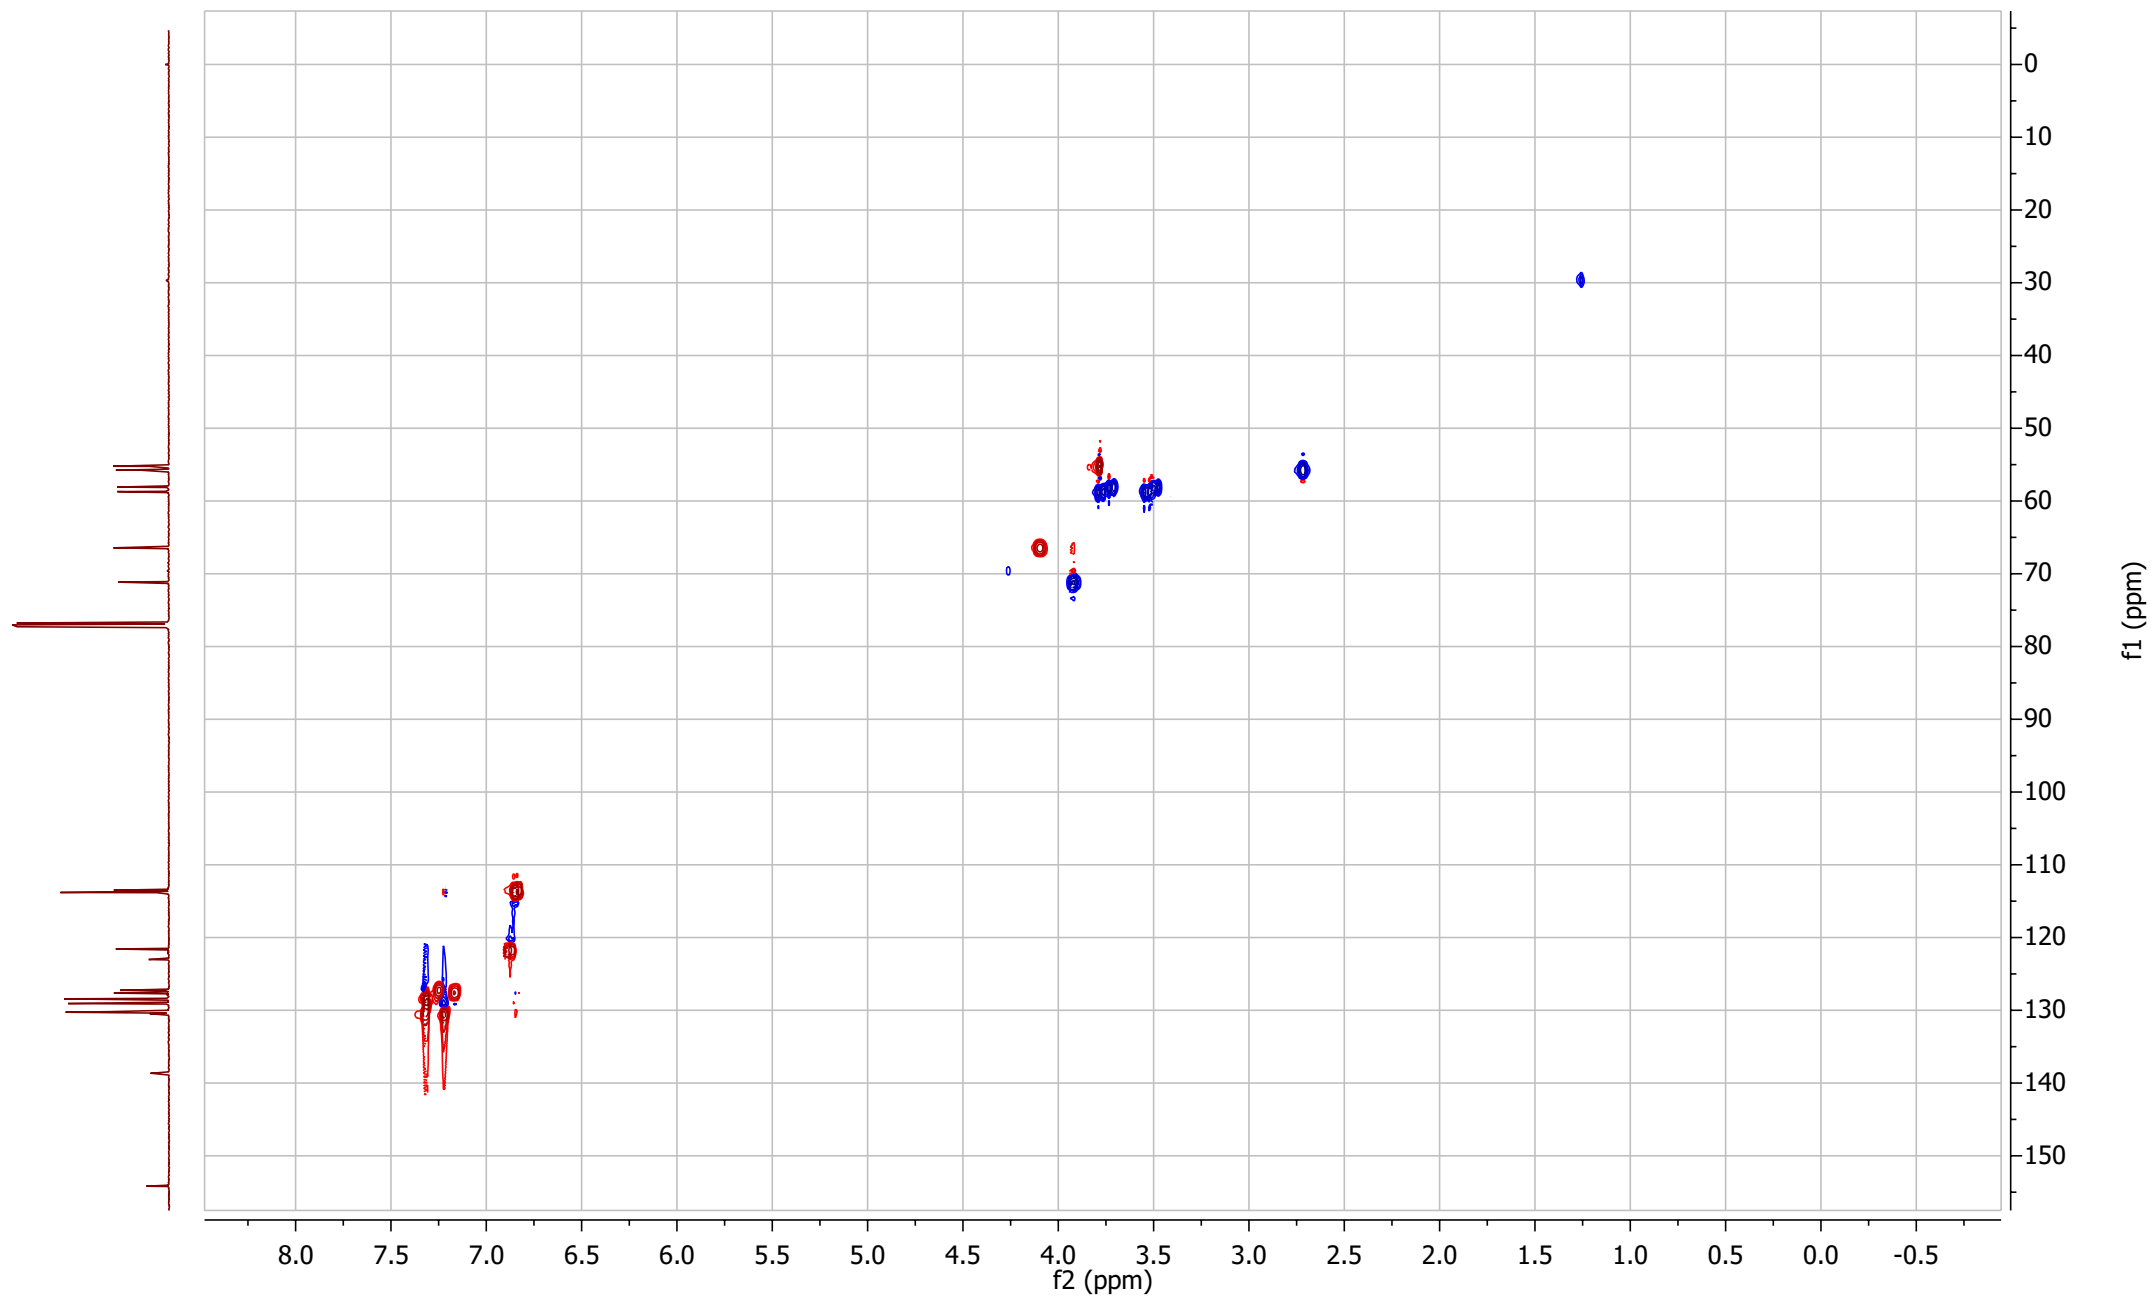

1-[(4-Chlorobenzyl)(3,4-dichlorobenzyl)amino]-3-(4-chlorophenoxy)propan-2-ol

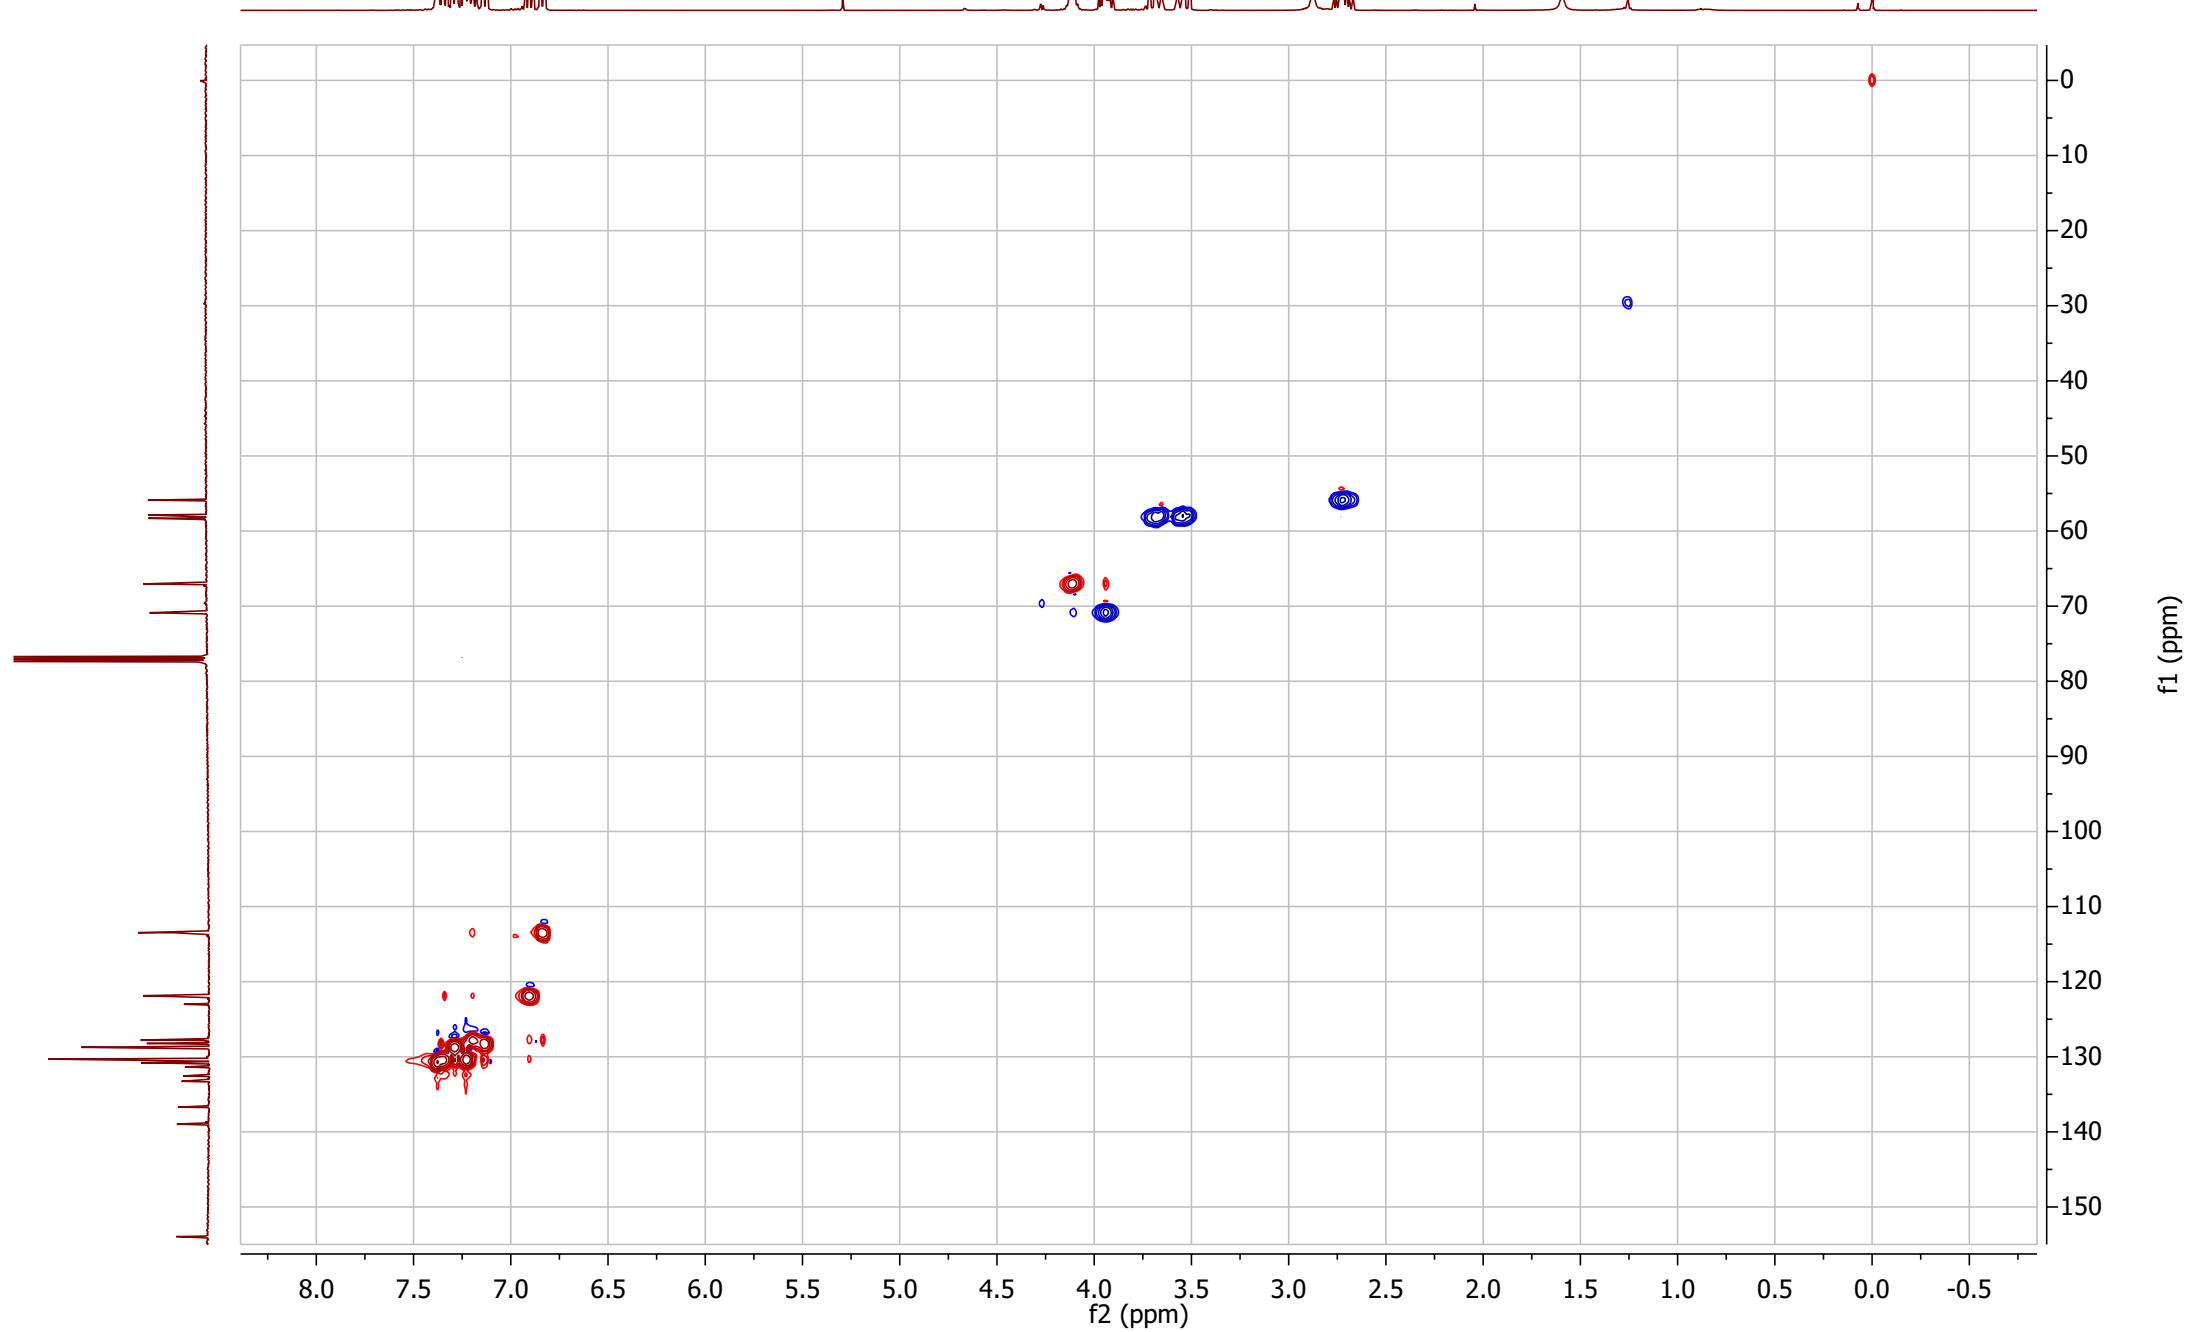

Supplement: s1 [file s1]
